# Supplementary material for: Early embryonic mutations reveal dynamics of somatic and germ cell lineages in mice
Source: HighWire-hosted journal article supplement (doi:10.1101/gr.276363.121), 2022-05-09
Supplement: Supplemental_Data_1.xlsx [file Supplemental_Data_1.xlsx]

## Sheet: Mutations(ConB23)
Supplemental Data 1. List of mosaic mutations with their VAFs
Mosaic mutations and ther VAFs in mouse ConB23
	Chr	Pos		REF	ALT		WGS data	VAF in WGS_100×	Cell position	Note	VAFS in negative control		Cerebrum	Cerebellum	Skin(Shoulder)	Skin(Buttocks)	Stomach	Lung	Liver-1	Liver-2	Liver-3	Intestine	Pancreas	Grandular gland	Quadriceps	Tongue	Heart	Spleen	Kidney	Testis1-1	Testis1-2	Testis2-1	Testis2-2	Sperm	Tail-youth	Tail	Somatic average	Germ ave	Total average	No offspring	Freq offspring	No in ntES	Tail 1:1 (diluted)	Tail 1:3 (diluted)	Tail 1:7 (diluted)	Tail 0:1 (negative con)	Sperm (negative con)	Max VAF	Min VAF
MosB 1	Chr 4	143311480	SNV	G	A	EWC	100×WGS	0.0540541	g-2		0.000759511	MosB 1	0.0815245	0.0782496	0.110648	0.0862258	0.108967	0.0914222	0.146424	0.143016	0.106804	0.0725844	0.0970037	0.0536085	0.0959782	0.0687603	0.120527	0.0704881	0.0836833	0.040918	0.0249817	0.0242066	0.0443664	0.0884436	0.0663589	0.0706094	0.092257	0.0445833	0.082325	4	0.0519481	2	0.0417873	0.0226301	0.0123766	0	0	0.146424	0.0242066
MosB 2	Chr 6	69604918	SNV	A	C	EWC	100×WGS	0.0561798	i-2		0.00795715	MosB 2	0.0610406	0.0919257	0.0777802	0.0770616	0.0509466	0.0681709	0.0661383	0.0988516	0.127593	0.0646924	0.0544832	0.158076	0.0656551	0.0958967	0.0822462	0.0834433	0.046522	0.0123144	0.0187039	0.109224	0.0217708	0.011501	0.0601357	0.149481	0.0831653	0.0347029	0.0719817	0	0	0	0.0921729	0.0493946	0.0255262	0	0	0.158076	0.011501
MosB 5	Chr 10	100917722	SNV	G	T	EWC	100×WGS	0.0612245	h-1		0.00115447	MosB 5	0.153338	0.144932	0.190952	0.183147	0.102261	0.165192	0.0994598	0.133613	0.259069	0.152752	0.0889768	0.268784	0.151658	0.176448	0.165687	0.223378	0.106604	0.176455	0.162244	0.213724	0.25619	0.15686	0.133634	0.229298	0.164694	0.193095	0.171248	18	0.233766	1	0.149148	0.0824031	0.0387353	0	0	0.268784	0.0889768
MosB 6	Chr 2	20934560	SNV	T	G	EWC	100×WGS	0.0746269	ND		0.00253924	MosB 6	0.0384077	0.0400369	0.0105105	0.0116516	0.0464208	0.0183291	0.0204133	0.0198021	0.0132548	0.0237549	0.106748	0.0334698	0.0335719	0.0233183	0.0282225	0.0163921	0.0203447	0.00206481	0.0165075	0.00803442	0.00856081	0.000300088	0.0225283	0.0103605	0.0282915	0.00709352	0.0233996	0	0	0	0.00762839	0.00437554	0.00361731	0	0	0.106748	0.000300088
MosB 9	Chr 6	60830987	SNV	C	G	EWC	100×WGS	0.0849057	f-4		0.000215385	MosB 9	0.0581949	0.0140855	0.0255166	0.0341012	0.0126968	0.0719656	0.0323692	0.0942883	0.0301308	0.0556285	0.00995618	0.0298179	0.0545381	0.0204637	0.04927	0.0488898	0.0725639	0.028986	0.010861	0.0420281	0.0263034	0.0130162	0.0739971	0.0264644	0.0428915	0.024239	0.0385871	2	0.025974	0	0.0158311	0.00990537	0.0060181	0	0	0.0942883	0.00995618
MosB 10_div2	Chr X	40850187	SNV	C	T	EWC	100×WGS	0.0851064	ND		0.000439754	MosB 10div2	0.00112223	-0.000162592	0.00312575	0.00711014	0.0119517	0.0011522	0.000370838	0.000531875	0.00030715	0.00899337	0.00262368	0.000578663	0.00269386	0.00521042	0.004281	0.0056766	0.000147988	0.000138329	0.000643673	0.000991828	0.0041903	0.000135441	0.0440216	0.00817672	0.00567964	0.00121991	0.00465047	0	0	0	0.00561889	0.00260306	0.00157403	0	0	0.0440216	-0.000162592
MosB 11	Chr 12	77658730	SNV	T	A	EWC	100×WGS	0.0882353	h-2		0.000394976	MosB 11	0.10335	0.134786	0.112436	0.10829	0.0604545	0.0962728	0.0346332	0.0303178	0.114823	0.084368	0.0309771	0.0770125	0.108004	0.0850156	0.0889786	0.138052	0.0927024	0.175602	0.137168	0.0959749	0.232931	0.152394	0.0865592	0.081867	0.0878368	0.158814	0.104216	18	0.233766	1	0.0560435	0.0277729	0.0117156	0	0	0.232931	0.0303178
MosB 12	Chr 2	47215631	SNV	G	T	EWC	100×WGS	0.0897436	d-4		0.00339708	MosB 12	0.0172278	0.017145	0.0260935	0.0276715	0.0202161	0.0367001	0.00785723	0.0174474	0.021052	0.0453003	0.00923539	0.0238452	0.0575829	0.0442779	0.0407581	0.0259258	0.0416644	0.0136133	0.00921233	0.0278515	0.00903821	0.00043872	0.0415811	0.0274195	0.0288948	0.0120308	0.0250031	0	0	0	0.0197675	0.00595843	-0.00084931	0	0	0.0575829	0.00043872
MosB 13	Chr 12	99045087	SNV	G	C	EWC	100×WGS	0.0909091	a-3		0.00147463	MosB 13	0.0686182	0.041848	0.115102	0.100524	0.139066	0.0764375	0.0253544	0.0287016	0.0278418	0.112945	0.16434	0.0925124	0.0960055	0.103008	0.0848575	0.0927865	0.107903	0.123336	0.275016	0.215515	0.145518	0.230081	0.133478	0.0859268	0.0893293	0.197893	0.114383	18	0.233766	0	0.0557625	0.0286772	0.0160732	0	0	0.275016	0.0253544
MosB 14	Chr 13	97554893	SNV	T	A	EWC	100×WGS	0.0918367	h-1		0.000275507	MosB 14	0.168501	0.236153	0.204439	0.200797	0.127193	0.177342	0.117991	0.124006	0.261711	0.15523	0.0974533	0.253546	0.183111	0.190779	0.172093	0.232354	0.167579	0.187185	0.167993	0.217961	0.258861	0.161896	0.162373	0.247032	0.183141	0.198779	0.18675	18	0.233766	1	0.154931	0.0871321	0.037203	0	0	0.261711	0.0974533
MosB 15	Chr 3	47271707	SNV	C	A	EWC	100×WGS	0.0957447	a-3		0.00274005	MosB 15	0.0681655	0.0391761	0.109841	0.0975438	0.125585	0.0745462	0.0247891	0.029507	0.0234858	0.107142	0.153857	0.0831806	0.088805	0.0942222	0.0788553	0.0905884	0.102265	0.107798	0.254403	0.199874	0.132287	0.211039	0.118238	0.0861019	0.0839945	0.18108	0.106399	18	0.233766	0	0.0488098	0.0276767	0.0167519	0	0	0.254403	0.0234858
MosB 17	Chr 9	19412175	SNV	A	G	EWC	100×WGS	0.103448	a-5		0.00288809	MosB 17	0.0230665	0.00360486	0.0459225	0.0336784	0.0509277	0.0165521	0.00936377	0.00478334	0.00385688	0.0453822	0.154122	0.0577239	0.00936526	0.0147211	0.0196338	0.0180392	0.00499252	0.10388	0.256105	0.183201	0.134293	0.225029	0.0650971	0.0167043	0.0314494	0.180501	0.065846	19	0.246753	0	0.0113325	0.005756	0.00288619	0	0	0.256105	0.00360486
MosB 18_div2	Chr X	104429236	SNV	A	T	EWC	100×WGS	0.106383	a-6		0.000122865	MosB 18div2	0.00815886	0.00170839	0.0166586	0.0204338	0.0202304	0.00450466	0.00432867	0.0019487	0.00104374	0.0140595	0.0280491	0.0557925	0.0130915	0.0104389	0.0160109	0.0111658	0.000174003	0.096963	0.256153	0.178891	0.134323	0.218995	0.0631046	0.0125639	0.0159719	0.177065	0.0531472	12	0.155844	0	0.00751139	0.00379324	0.00181057	0	0	0.256153	0.000174003
MosB 19	Chr 18	21819951	SNV	G	T	EWC	100×WGS	0.106667	a-3		0.010332	MosB 19	0.0725529	0.0349767	0.110638	0.101162	0.136782	0.0759873	0.0278819	0.035282	0.0328116	0.0990238	0.183151	0.0935481	0.0923002	0.0951745	0.080921	0.0877045	0.113326	0.117391	0.2918	0.220004	0.150991	0.231937	0.13522	0.0849085	0.0891238	0.202425	0.11527	14	0.181818	0	0.0530412	0.0271295	0.0129611	0	0	0.2918	0.0278819
MosB 20	Chr 4	69469458	SNV	A	G	EWC	100×WGS	0.107527	e-3		0.00205497	MosB 20	0.129312	0.109602	0.0689288	0.0895643	0.0949373	0.146762	0.11763	0.114092	0.0763768	0.0959129	0.114248	0.0755694	0.11629	0.105575	0.0988309	0.0713196	0.118264	0.151179	0.0394514	0.0578061	0.045299	0.0301157	0.137697	0.0714286	0.102755	0.0647703	0.0939892	3	0.038961	1	0.0419782	0.0231359	0.0125494	0	0	0.151179	0.0301157
MosB 21	Chr 3	94900762	SNV	C	T	EWC	100×WGS	0.109375	a-4		0.00190014	MosB 21	0.0616288	0.0289987	0.0773873	0.0757122	0.110425	0.0452831	0.0155771	0.012225	0.00667901	0.0591624	0.154615	0.0696661	0.0422797	0.0522702	0.0404324	0.0528922	0.0618977	0.10731	0.258677	0.183461	0.139707	0.222054	0.0863409	0.0618169	0.0586995	0.182242	0.0872093	17	0.220779	0	0.0382248	0.0211239	0.0100285	0	0	0.258677	0.00667901
MosB 22	Chr 5	118769585	SNV	C	G	EWC	100×WGS	0.120879	h-1		0.00107991	MosB 22	0.16491	0.234878	0.21017	0.204555	0.134012	0.175222	0.107458	0.134746	0.251104	0.152492	0.0881121	0.277616	0.187872	0.181194	0.175558	0.25867	0.170713	0.200295	0.156757	0.210168	0.254996	0.161004	0.153425	0.247336	0.184739	0.196644	0.187486	10	0.12987	1	0.161746	0.0846665	0.0458882	0	0	0.277616	0.0881121
MosB 24	Chr 12	99132221	SNV	G	T	EWC	100×WGS	0.155556	e-3		0.00138937	MosB 24	0.14057	0.112342	0.052048	0.0983372	0.0881772	0.142299	0.120453	0.156605	0.0865419	0.129822	0.115649	0.079944	0.121752	0.10353	0.105233	0.0793636	0.113589	0.152282	0.0386539	0.0553631	0.0462006	0.0309028	0.143391	0.0663118	0.108208	0.0646805	0.0981635	4	0.0519481	1	0.0386106	0.0233225	0.0137378	0	0	0.156605	0.0309028
MosB 25	Chr 12	99140750	SNV	C	A	EWC	100×WGS	0.179487	e-3		0.00313778	MosB 25	0.144809	0.118463	0.0517782	0.0939386	0.090564	0.134198	0.118131	0.147801	0.0864299	0.118412	0.114377	0.0841443	0.118203	0.100766	0.105654	0.0751788	0.109926	0.147879	0.0389226	0.0527624	0.0442965	0.0306684	0.14028	0.0640818	0.106165	0.0629057	0.0961821	4	0.0519481	1	0.0368778	0.0212901	0.013715	0	0	0.147879	0.0306684
MosB 26	Chr 6	21434032	SNV	C	G	EWC	100×WGS	0.192661	a-3		0.000367475	MosB 26	0.0710638	0.0381534	0.108691	0.0992048	0.133856	0.0755264	0.0271967	0.0285969	0.0282989	0.107765	0.167653	0.0914117	0.0964802	0.0982064	0.0800875	0.0929225	0.105842	0.119461	0.270453	0.212538	0.15145	0.229169	0.132566	0.0871663	0.0879309	0.196614	0.113012	11	0.142857	0	0.0539228	0.0293084	0.0168225	0	0	0.270453	0.0271967
MosB 28	Chr 15	54848437	SNV	T	G	EWC	100×WGS	0.235955	a-2		0.000789711	MosB 28	0.215781	0.152478	0.160105	0.196065	0.218946	0.222084	0.145067	0.182393	0.117159	0.232766	0.291812	0.162939	0.218062	0.204947	0.190449	0.164681	0.232314	0.268112	0.308536	0.265242	0.192856	0.258375	0.274045	0.15251	0.196558	0.258624	0.210881	17	0.220779	1	0.0948564	0.0549929	0.0254398	0	0	0.308536	0.117159
MosB 30	Chr 6	23822367	SNV	A	G	EWC	100×WGS	0.277228	a-1		0.00424049	MosB 30	0.292716	0.228905	0.288373	0.27058	0.333653	0.300489	0.289534	0.312778	0.212149	0.316448	0.372141	0.233728	0.302187	0.254388	0.304476	0.229912	0.323259	0.305902	0.33087	0.287696	0.236119	0.338904	0.336716	0.224207	0.285613	0.299898	0.288909	15	0.194805	3	0.138855	0.0787323	0.0393838	0	0	0.372141	0.212149
MosB 31	Chr 4	21959891	SNV	C	T	EWC	100×WGS	0.342342	a-2		0.0035816	MosB 31	0.214222	0.151333	0.172161	0.196418	0.219061	0.216276	0.144427	0.185748	0.109619	0.219386	0.274796	0.178212	0.215192	0.194362	0.186318	0.168776	0.220837	0.264127	0.301921	0.262005	0.190139	0.248661	0.268512	0.153744	0.194179	0.253371	0.207839	17	0.220779	1	0.0920288	0.0579719	0.0281908	0	0	0.301921	0.109619
MosB 34	Chr 15	72448744	indel	GT	G	EWC	100×WGS	0.097561	ND		0.000837922	MosB 34	0.0283355	0.0120231	0.0128804	0.0145746	0.0101909	0.0438223	0.0190577	0.0299819	0.0126548	0.0105832	0.00793475	0.0238632	0.0116938	0.00681026	0.00888379	0.0213627	0.0424503	0.00663373	0.00411236	0.00355284	0.00685368	0.000172144	0.0672158	0.0115965	0.0208376	0.00426495	0.0170132	0	0	0	0.00865091	0.00234484	0.00083067	0	0	0.0672158	0.000172144
MosB 35	Chr 3	147251890	indel	GT	G	EWC	100×WGS	0.185714	a-3		7.20357e-05	MosB 35	0.0723536	0.0395675	0.120552	0.108454	0.146838	0.0810942	0.0247906	0.0249446	0.0279373	0.130435	0.165091	0.103876	0.104916	0.100578	0.0938596	0.105976	0.125909	0.130658	0.265272	0.214869	0.149539	0.22055	0.129443	0.0881476	0.0944612	0.196178	0.117934	15	0.194805	0	0.0609257	0.034096	0.0133267	0	0	0.265272	0.0247906
MosB 37	Chr 6	129867463	SNV	G	C	EWC	100×WGS	0.075	g-2		0.000479482	MosB 37	0.0766785	0.0798353	0.115485	0.0933204	0.123841	0.0937333	0.150377	0.140752	0.10674	0.0876953	0.100809	0.0555688	0.102625	0.070548	0.127187	0.076123	0.0886275	0.0397707	0.0227164	0.0250065	0.0458278	0.0873372	0.0638324	0.0717709	0.0960816	0.0441317	0.0840931	5	0.0649351	2	0.0476978	0.0241751	0.0104653	0	0	0.150377	0.0227164
MosB 38	Chr 16	41786834	SNV	T	G	EWC	100×WGS	0.1	e-4		0.000699105	MosB 38	0.0854174	0.102111	0.0346809	0.0568762	0.0755679	0.0702429	0.0849609	0.0606788	0.0558472	0.0609945	0.102196	0.0494839	0.0637925	0.0810857	0.0544247	0.0305048	0.0472809	0.114903	0.0276579	0.0101825	0.0215048	0.0179797	0.0635309	0.0402416	0.0642062	0.0384456	0.0582615	3	0.038961	1	0.0278694	0.0183927	0.00703131	0	0	0.114903	0.0101825
MosB 42	Chr 8	52004504	SNV	C	A	EWC	100×WGS	0.0746269	g-2		0.00659885	MosB 42	0.0850015	0.0788455	0.110692	0.102147	0.124273	0.0909307	0.161172	0.147311	0.103831	0.0913022	0.0938193	0.0500478	0.100402	0.0735621	0.129615	0.0803383	0.0855126	0.0385128	0.0233365	0.0235806	0.044052	0.088264	0.05894	0.068686	0.0966542	0.0435492	0.0843992	4	0.0519481	2	0.0403755	0.0192158	0.0119924	0	0	0.161172	0.0233365
MosB 43	Chr 10	123946087	SNV	C	T	EWC	100×WGS	0.193548	h-1		0.00319521	MosB 43	0.180697	0.239157	0.196029	0.208514	0.121993	0.169555	0.112235	0.124566	0.255165	0.157441	0.0902778	0.26124	0.180439	0.181258	0.178762	0.236234	0.163658	0.198106	0.1619	0.210574	0.256053	0.16537	0.152482	0.251779	0.182183	0.198401	0.185926	8	0.103896	1	0.157649	0.0878391	0.0428733	0	0	0.26124	0.0902778
MosB 45	Chr 2	75787115	SNV	C	T	EWC	100×WGS	0.041	ND		0.0013719	MosB 45	0.0130567	0.00522151	0.00889781	0.013877	0.0244385	0.0278033	0.0167967	0.0138458	0.0639338	0.0090193	0.011717	0.00338001	0.0125837	0.0111909	0.0224807	0.0108476	0.0118917	0.000929067	0.00324227	0.00130205	0.00409313	-0.000111169	0.0436306	0.00645623	0.0174247	0.00189107	0.01384	0	0	0	0.00451592	0.00210764	0.000714695	0	0	0.0639338	-0.000111169
MosB 62	Chr 1	145925285	SNV	A	G	noEWC	100×WGS	0.149123	e-3		0.00360699	MosB 62	0.139908	0.116206	0.0638629	0.0984784	0.0989112	0.140191	0.115642	0.15335	0.0861675	0.123004	0.11655	0.0832245	0.116865	0.0952453	0.101485	0.075359	0.115422	0.142634	0.0442316	0.0540489	0.0492994	0.0300961	0.139556	0.0681601	0.107768	0.064062	0.0976819	1	0.012987	1	0.03358	0.0181682	0.0090501	0	0	0.15335	0.0300961
MosB 82	Chr 14	86131940	SNV	G	A	noEWC	100×WGS	0.0666667	a-5		0.00247861	MosB 82	0.0204084	0.00484793	0.0456869	0.0353389	0.0501402	0.0181236	0.0104621	0.00387732	0.00370882	0.0406157	0.144748	0.0540276	0.0127372	0.0141244	0.0193746	0.0208361	0.00472434	0.10101	0.249575	0.173884	0.129745	0.213609	0.060317	0.0169309	0.0305805	0.173565	0.0635769	15	0.194805	0	0.0087269	0.00553742	0.00174787	0	0	0.249575	0.00370882
													1
Genotyping results of the offspring
													Spouse #1	Spouse #2	Spouse #3	F1 of #3	F1 of #3	F1 of #3	F1 of #3	F1 of #3	F1 of #3	F1 of #3	F1 of #3	F1 of #3	F1 of #3	F1 of #3	F1 of #3	F1 of #3	F1 of #2	F1 of #2	F1 of #2	F1 of #2	F1 of #2	F1 of #1	F1 of #1	F1 of #1	IVF	IVF	IVF	IVF	IVF	IVF	IVF	IVF	IVF	IVF	IVF	IVF	IVF
													ConB23-1122f1	ConB23-1122f2	ConB23-1122f3	ConB24-0225m1	ConB24-0225m2	ConB24-0225m3	ConB24-0404m1	ConB24-0404m2	ConB24-0404m3	ConB24-0404f1	ConB24-0404f2	ConB24-0404f3	ConB24-0509m1	ConB24-0509m2	ConB24-0509f1	ConB24-0509f2	ConB24-0214m1	ConB24-0214m2	ConB24-0214f1	ConB24-0214f2	ConB24-0214f3	ConB24-0222m1	ConB24-0222m2	ConB24-0222pup	ConB23-pup1	ConB23-pup2	ConB23-pup3	ConB23-pup4	ConB23-pup5	ConB23-pup6	ConB23-pup7	ConB23-pup8	ConB23-pup9	ConB23-pup10	ConB23-pup11	ConB23-pup12	ConB23-pup13
	Chr	Pos		REF	ALT		WGS data	VAF in WGS_100×	Cell position	Note	VAFS in negative control					m	m	m	m	m	m	f	f	f	m	m	f	f	m	m	f	f	f	m	m	m	f	m	m	f	m	f	m	m	f	f	m	f	f
MosB 1	Chr 4	143311480	SNV	G	A	EWC	100×WGS	0.0540541	g-2		0.000759511	MosB 1	0.000319489	0.000400962	0	0	0.000588755	0.000310752	0.00127779	0.00133976	0.000883652	0.000684697	0.00166159	0.00150263	0.000331455	0.00196961	0.00143781	0.000963701	0	0.00141483	0.00131406	0.000714796	0.000244439	0.00139082	0	0.00112183	0.00356506	0.000971817	0.000829187	0.000820345	0	0.000982318	0	0.000847458	0.486989	0	0.00087184	0.000838223	0.00341686
MosB 2	Chr 6	69604918	SNV	A	C	EWC	100×WGS	0.0561798	i-2		0.00795715	MosB 2	0.000687285	0.000820345	0.00164339	0.00249377	0.0012285	0.00196592	0	0	0	0.00138696	0.00130548	0	0.000651466	0.0032345	0.000723589	0.00260926	0.000583771	0	0.00134862	0.00136799	0.00142925	0	0.00110193	0.000785855	0.00177936	0.0019685	0.0015015	0	0.00257732	0.00731261	0.00171821	0.0016835	0	0.00151745	0.00998004	0.00548446	0.00403226
MosB 5	Chr 10	100917722	SNV	G	T	EWC	100×WGS	0.0612245	h-1		0.00115447	MosB 5	0.00136879	0.000230627	0.000220264	0	0.000581058	0.000449236	0.501163	0.495844	0.48549	0.000651042	0.000181389	0.507725	0.00373208	0.00183731	0.496754	0.00468842	0.000951294	0.502716	0.479447	0.499349	0.00305455	0.00106061	0.494789	0.423477	0.000644745	0.515313	0	0	0.000439947	0	0.00120992	0	0	0.00101317	0.000597729	0	0.0008285
MosB 6	Chr 2	20934560	SNV	T	G	EWC	100×WGS	0.0746269	ND		0.00253924	MosB 6	0.00181488	0	0	0.000783085	0.00188679	0	0.0013587	0	0.00157978	0	0	0	0	0	0.000901713	0	0	0.000706215	0	0	0	0	0.000705716	0.000608273	0	0	0	0	0	0.00255754	0	0.00431034	0.00383142	0	0	0	0.0030303
MosB 9	Chr 6	60830987	SNV	C	G	EWC	100×WGS	0.0849057	f-4		0.000215385	MosB 9	0.000129082	0	0	0.000226783	0.000240645	0	0	0	0	0	0	0.000395517	0.000127698	0.000108096	0	0	0	0.000114416	0.000124922	0.000139958	0	0	0	0.000145243	0	0	0	0	0.000865301	0	0	0	0.000733138	0.000343525	0	0.503543	0
MosB 10_div2	Chr X	40850187	SNV	C	T	EWC	100×WGS	0.0851064	ND		0.000439754	MosB 10div2	0.000676018	0	0.000725953	0.00127421	0.000545703	0.000309693	0.000968758	0.00199501	0.000247402	0.000724244	0.00057612	0.00179115	0	0.000972999	0.00112486	0.00193143	0.000566893	0.00100075	0.000339443	0.000561693	0.000251604	0.000219829	0.00127324	0.000897129	0.000538793	0	0	0.00152207	0.000621891	0.000554017	0.000851789	0.000775795	0	0	0.000814996	0.00153453	0
MosB 11	Chr 12	77658730	SNV	T	A	EWC	100×WGS	0.0882353	h-2		0.000394976	MosB 11	0	0	0	0	0	0.529781	0.494845	0.504178	0.486076	0.00215517	0	0.484871	0	0.00201613	0	0	0	0.537713	0.528736	0.488095	0.541494	0.00223214	0.497512	0.0579268	0	0.000919963	0	0	0	0	0.000782473	0.49487	0	0	0.000880282	0	0.000923361
MosB 12	Chr 2	47215631	SNV	G	T	EWC	100×WGS	0.0897436	d-4		0.00339708	MosB 12	0.000542299	0.000704722	0.000574383	0.000502765	0	0.0015715	0.00092081	0	0.000512821	0.00169972	0.000959693	0	0.000577701	0.000983284	0.00183824	0.000558347	0	0.000967118	0.00119119	0	0.000422476	0.000444642	0	0.00283286	0.00420168	0	0.00154799	0.00149925	0	0.00186567	0.00170068	0.0015748	0	0	0	0.00162338	0.00296736
MosB 13	Chr 12	99045087	SNV	G	C	EWC	100×WGS	0.0909091	a-3		0.00147463	MosB 13	0.000242072	0.000545554	0	0.499547	0.498706	0	0.000218103	0	0.000436205	0	0	0	0	0.503559	0.00192944	0.000755287	0.000250188	0	0.000250752	0	0.000381607	0.490724	0.000227687	0.0158665	0.492958	0	0.503429	0.510008	0.00184388	0.519332	0.4968	0.000781861	0.000714796	0	0	0	0
MosB 14	Chr 13	97554893	SNV	T	A	EWC	100×WGS	0.0918367	h-1		0.000275507	MosB 14	0.000182382	0	0	0	0.000176678	0.477243	0.496924	0.511613	0.501546	0.000373552	0	0.50682	0.00143498	0.00230556	0.506133	0.00329369	0.000542299	0.000963082	0.000381316	0.000201248	0.00084246	0.000308214	0.500979	0.0588891	0	0	0	0.00055991	0	0	0	0.493867	0	0.000501505	0	0	0
MosB 15	Chr 3	47271707	SNV	C	A	EWC	100×WGS	0.0957447	a-3		0.00274005	MosB 15	0	0.000901442	0.00117199	0.479056	0.487879	0.000790931	0.00166563	0.000669643	0.000925283	0.00025641	0.000698812	0.000823271	0.000490557	0.482751	0.00236718	0.00175395	0.499536	0.00109505	0.000505178	0.00137137	0.000362253	0.490473	0.00107735	0.0391214	0.47432	0.00083612	0.00068918	0.00229008	0.00344234	0.0046729	0.00321802	0.000738007	0.00542215	0.000639795	0.0029347	0.00337382	0.00779727
MosB 17	Chr 9	19412175	SNV	A	G	EWC	100×WGS	0.103448	a-5		0.00288809	MosB 17	0.00238949	0.00201039	0.00233996	0.497585	0.00336503	0.00362498	0.00327311	0.00244167	0.00228648	0.00308592	0.00391134	0.00260799	0.00209711	0.492263	0.00591716	0.00465405	0.00378728	0.00326087	0.00359948	0.00339528	0.00396727	0.509572	0.00493827	0.00723262	0.0047619	0.00341131	0.49359	0.00459137	0.494582	0.00442478	0.00566696	0.0025652	0.00378629	0.00271003	0.00219491	0.00411147	0.00290276
MosB 18_div2	Chr X	104429236	SNV	A	T	EWC	100×WGS	0.106383	a-6		0.000122865	MosB 18div2	0.000555093	0	0.00026824	0	0	0.000708215	0	0.000549753	0	0.507679	0.000188715	0.000242483	0.000689655	0	0.000696136	0	0	0	0.000697107	0.000364033	0	0	0.00117096	0.000465333	0.511392	0	0	0.564617	0	0.530612	0	0	0	0.00107875	0	0	0.536184
MosB 19	Chr 18	21819951	SNV	G	T	EWC	100×WGS	0.106667	a-3		0.010332	MosB 19	0.00184298	0.00176445	0.00216544	0.00286898	0.00188917	0.00209644	0.00229029	0.00213025	0.00211098	0.49058	0.00102564	0.000797448	0.00198939	0.0025203	0.0027027	0.00299401	0.00239644	0.0022779	0.000313676	0.00213144	0.00127747	0.000264201	0.00152207	0.00940046	0.501733	0	0	0.00182815	0.498354	0.497137	0.00319744	0.00399361	0.0015748	0.00152207	0.00176678	0.000957854	0.00816327
MosB 20	Chr 4	69469458	SNV	A	G	EWC	100×WGS	0.107527	e-3		0.00205497	MosB 20	0.00222717	0.00383142	0.0027933	0.00178571	0.00172117	0.00344828	0.00504202	0.00342466	0.00188324	0.00221239	0	0.00230415	0.467213	0.00402145	0.0039604	0.473394	0.0032	0.00156006	0.00664452	0	0.00383142	0.00437637	0.002886	0.00486027	0.0026738	0.00291545	0.00429185	0	0.0113208	0.005	0.00449438	0	0.00255754	0	0	0.465823	0
MosB 21	Chr 3	94900762	SNV	C	T	EWC	100×WGS	0.109375	a-4		0.00190014	MosB 21	0.00134953	0.000969932	0.000895255	0	0.000826446	0.0013369	0.000757576	0.000808734	0.00127226	0.502418	0.000360881	0.000909091	0.0018018	0.0017934	0.00147203	0.00130435	0.000780945	0.0010772	0.00139795	0.00236072	0.000665336	0.000752729	0.000375094	0.000912131	0	0	0.505353	0.493166	0.510345	0.503083	0.502528	0.00216216	0.00242131	0	0	0.00462428	0.525122
MosB 22	Chr 5	118769585	SNV	C	G	EWC	100×WGS	0.120879	h-1		0.00107991	MosB 22	0	0	0	0.000522466	0	0	0	0	0.526125	0.00106838	0	0.000588235	0	0.000408998	0.000559597	0.000466853	0	0.000464684	0	0.51367	0.503194	0.000342466	0.000442282	0.00802644	0	0.492938	0.00112233	0	0.000978474	0	0	0	0	0	0	0	0
MosB 24	Chr 12	99132221	SNV	G	T	EWC	100×WGS	0.155556	e-3		0.00138937	MosB 24	0.00047081	0	0	0	0	0.000478011	0	0	0.000457457	0	0.000386698	0	0	0.000438596	0	0.480971	0	0.000850702	0	0.000569152	0	0	0	0	0.00136612	0.00142857	0	0	0.00104822	0	0.0025	0.00120627	0	0	0.00140056	0.501763	0.00223214
MosB 25	Chr 12	99140750	SNV	C	A	EWC	100×WGS	0.179487	e-3		0.00313778	MosB 25	0.000418936	0.000457875	0	0	0	0.000357398	0.000302939	0.000328623	0.000347705	0	0.000321027	0	0.000381679	0	0.000420345	0.497564	0	0	0.000381098	0.000419463	0.000277239	0.000316056	0.000659413	0	0.00125471	0	0	0.00114155	0	0.00110132	0	0	0	0	0	0.482122	0.0015748
MosB 26	Chr 6	21434032	SNV	C	G	EWC	100×WGS	0.192661	a-3		0.000367475	MosB 26	0	0	0	0.000246883	0	0.000143616	0.000234274	0.000122055	0	0.000291248	0	0	0	0.499373	0.000148854	0.000257699	0.505467	0.000123548	0.000536337	0	0.000102997	0.00011073	0.000120758	0	0	0.000422833	0.520291	0	0.493537	0	0	0	0	0	0	0	0.000414594
MosB 28	Chr 15	54848437	SNV	T	G	EWC	100×WGS	0.235955	a-2		0.000789711	MosB 28	0	0	0.0008726	0.518669	0	0	0.000461042	0	0	0	0	0	0.506266	0.0034188	0	0.480563	0.000625391	0	0	0	0.000367107	0.481521	0.000547046	0.0296514	0.00133869	0	0.495334	0.508929	0.522673	0	0	0	0	0.000711744	0	0	0.495238
MosB 30	Chr 6	23822367	SNV	A	G	EWC	100×WGS	0.277228	a-1		0.00424049	MosB 30	0.0041295	0.00353357	0.00281057	0.00387898	0.00328299	0.00224836	0.00374332	0.00293255	0.00383318	0.00310162	0.003289	0.00405429	0.00324734	0.508176	0.00399467	0.00427984	0.501652	0.00336012	0.00370121	0.00259933	0.00366764	0.00321005	0.005547	0.00365085	0.00479904	0.00246761	0.480039	0.00469974	0.5002	0.00446429	0.507834	0.00682927	0.494565	0.508181	0.00501002	0.00151134	0.0008285
MosB 31	Chr 4	21959891	SNV	C	T	EWC	100×WGS	0.342342	a-2		0.0035816	MosB 31	0.00294861	0.00200702	0.00288878	0.00269231	0.489835	0.0023245	0.000754717	0.00203943	0.00112613	0.51191	0.00144665	0.000442282	0.51246	0.499629	0.0060437	0.49763	0.00215146	0.00106045	0.00124069	0.00234082	0.000969932	0.00135044	0.00184502	0.00815956	0.00138026	0.00180018	0.000780031	0.493363	0.509854	0	0.000713776	0.002772	0.0015625	0.00259235	0.0016129	0.522314	0.00108578
MosB 34	Chr 15	72448744	indel	GT	G	EWC	100×WGS	0.097561	ND		0.000837922	MosB 34	0	0	0	0.000493097	0	0.000473037	0	0.000890076	0	0	0.00095057	0.000548246	0	0.000784314	0.000517063	0.00137552	0.000439754	0	0	0	0.000347705	0.000325521	0.000437254	0.000367918	0	0.00138504	0	0.00123916	0	0	0.00119332	0.0011655	0	0.00103627	0.00130208	0	0
MosB 35	Chr 3	147251890	indel	GT	G	EWC	100×WGS	0.185714	a-3		7.20357e-05	MosB 35	0	0	0	0.497386	0.513242	0	0	0	0	0	0	0	0	0	0	0	0.464934	0.00150905	0.0011217	0	0.000206526	0	0	0	0.475989	0	0	0	0	0.492604	0	0	0	0	0	0	0
MosB 37	Chr 6	129867463	SNV	G	C	EWC	100×WGS	0.075	g-2		0.000479482	MosB 37	0	0	0.000156495	0	0.00014518	0.00014941	0	0.00027371	0.000135906	0	0.000120207	0.000155618	0.000153445	0.000255395	0	0	0.000146156	0	0	0	0	0	0	0.000125691	0.000896861	0.000475059	0.000428816	0.000957854	0	0.00139535	0.000431034	0.000869565	0.488964	0	0.507443	0	0
MosB 38	Chr 16	41786834	SNV	T	G	EWC	100×WGS	0.1	e-4		0.000699105	MosB 38	0.000511771	0.000315856	0	0	0	0	0	0.000440335	0.000241779	0.000784929	0	0	0.485265	0.00186374	0.00183294	0.504222	0	0.000202388	0.000241196	0	0.000360036	0	0.000196078	0.000112765	0	0	0	0	0.000600601	0	0.000702741	0.000693001	0.00134228	0.000568505	0	0	0.00115607
MosB 42	Chr 8	52004504	SNV	C	A	EWC	100×WGS	0.0746269	g-2		0.00659885	MosB 42	0	0	0	0	0	0	0	0	0	0	0	0	0	0	0	0	0	0	0	0	0	0	0	0	0.00871731	0.00135318	0.00119474	0	0.000953289	0.00134953	0.00326264	0.00271739	0.00501882	0.498932	0.491284	0.00117096	0.00149701
MosB 43	Chr 10	123946087	SNV	C	T	EWC	100×WGS	0.193548	h-1		0.00319521	MosB 43	0.00234412	0.00121065	0.00263574	0.00340861	0.0016632	0.513825	0.0026892	0.00253807	0.511111	0.00510204	0.003003	0.00334448	0.00131349	0.0010281	0.494275	0.00555793	0.0015949	0.00111732	0.00378151	0.00135257	0.504991	0.00138427	0.00366435	0.0168627	0.00963597	0.00371287	0	0.00218579	0.00245098	0.00884956	0.00728408	0.0040404	0.00807265	0.000998004	0.00497512	0.00100705	0.00787402
MosB 45	Chr 2	75787115	SNV	C	T	EWC	100×WGS	0.041	ND		0.0013719	MosB 45	0	0	0	0	0.0416667	0	0	0	0.125	0	0	0	0	0	0	0.0909091	0	0	0	0	0.0555556	0	0	0	0.00280112	0.0013245	0.00486027	0.00237248	0	0.00258065	0.00119617	0.00114025	0.00119474	0.00106157	0.00116686	0.00121359	0.00167785
MosB 62	Chr 1	145925285	SNV	A	G	noEWC	100×WGS	0.149123	e-3		0.00360699	MosB 62	0.00393701	0.00445293	0.00682261	0.00472335	0.00300172	0.00411523	0.00395413	0.00278996	0.0049398	0.0037144	0.00203749	0.00455063	0.497623	0.00593668	0.00334076	0.00327466	0.00383509	0.00455729	0.00489796	0.00417319	0.00401445	0.00329046	0.00448934	0.00564668	0.00802752	0.00672948	0.0075431	0.00596659	0.00526316	0.00508906	0.00565611	0.00206612	0.0045403	0.00461255	0	0.00444939	0.00138122
MosB 82	Chr 14	86131940	SNV	G	A	noEWC	100×WGS	0.0666667	a-5		0.00247861	MosB 82	0.00227402	0.003861	0.00523349	0.00312989	0.00212427	0.00228746	0.00267459	0.0034904	0.00253485	0.00155376	0.00247389	0.00201126	0.00293647	0.479368	0.00861362	0.00252071	0.493405	0.00308902	0.00249792	0.00275049	0.00256849	0.00446803	0.000996678	0.00452675	0.00160256	0.00313725	0.477932	0.488978	0.475419	0.00314713	0.492833	0.00138696	0.00342231	0.00169875	0.00139373	0.00332447	0.476066
													1
	Genotyping results of ntES cell lines
	Chr	Pos		REF	ALT		WGS data	VAF in WGS_100×	Cell position	Note	VAFS in negative control		ConB23-UT1	ConB23-UT2	ConB23-UT3	ConB23-UT4	MAX VAF	Number of cell lines
MosB 1	Chr 4	143311480	SNV	G	A	EWC	100×WGS	0.0540541	g-2		0.000759511	MosB 1	0	0.00381194	0.479769	0.507547	0.507547	2
MosB 2	Chr 6	69604918	SNV	A	C	EWC	100×WGS	0.0561798	i-2		0.00795715	MosB 2	0.00404858	0.00442478	0.00192308	0.00228833	0.00442478	0
MosB 5	Chr 10	100917722	SNV	G	T	EWC	100×WGS	0.0612245	h-1		0.00115447	MosB 5	0.503268	0.000731529	0	0	0.503268	1
MosB 6	Chr 2	20934560	SNV	T	G	EWC	100×WGS	0.0746269	ND		0.00253924	MosB 6	0.00298507	0	0	0	0.00298507	0
MosB 9	Chr 6	60830987	SNV	C	G	EWC	100×WGS	0.0849057	f-4		0.000215385	MosB 9	0.000380518	0	0	0	0.000380518	0
MosB 10div2	Chr X	40850187	SNV	C	T	EWC	100×WGS	0.0851064	ND		0.000439754	MosB 10div2	0.00373832	0	0.000917431	0	0.00373832	0
MosB 11	Chr 12	77658730	SNV	T	A	EWC	100×WGS	0.0882353	h-2		0.000394976	MosB 11	0.535809	0.00203046	0	0	0.535809	1
MosB 12	Chr 2	47215631	SNV	G	T	EWC	100×WGS	0.0897436	d-4		0.00339708	MosB 12	0.00234742	0	0	0.0038835	0.0038835	0
MosB 13	Chr 12	99045087	SNV	G	C	EWC	100×WGS	0.0909091	a-3		0.00147463	MosB 13	0	0	0.000748503	0.00168919	0.00168919	0
MosB 14	Chr 13	97554893	SNV	T	A	EWC	100×WGS	0.0918367	h-1		0.000275507	MosB 14	0.493298	0	0.000492126	0	0.493298	1
MosB 15	Chr 3	47271707	SNV	C	A	EWC	100×WGS	0.0957447	a-3		0.00274005	MosB 15	0.00745573	0.00462963	0.00998004	0.000938086	0.00998004	0
MosB 17	Chr 9	19412175	SNV	A	G	EWC	100×WGS	0.103448	a-5		0.00288809	MosB 17	0.00345871	0.00208008	0.00309872	0.00567644	0.00567644	0
MosB 18div2	Chr X	104429236	SNV	A	T	EWC	100×WGS	0.106383	a-6		0.000122865	MosB 18div2	0.00203666	0	0	0	0.00203666	0
MosB 19	Chr 18	21819951	SNV	G	T	EWC	100×WGS	0.106667	a-3		0.010332	MosB 19	0.00275482	0.00521376	0.00166945	0.00287632	0.00521376	0
MosB 20	Chr 4	69469458	SNV	A	G	EWC	100×WGS	0.107527	e-3		0.00205497	MosB 20	0.00544959	0.489097	0.00881057	0.00692042	0.489097	1
MosB 21	Chr 3	94900762	SNV	C	T	EWC	100×WGS	0.109375	a-4		0.00190014	MosB 21	0.00105708	0	0	0.00108578	0.00108578	0
MosB 22	Chr 5	118769585	SNV	C	G	EWC	100×WGS	0.120879	h-1		0.00107991	MosB 22	0.478873	0	0	0	0.478873	1
MosB 24	Chr 12	99132221	SNV	G	T	EWC	100×WGS	0.155556	e-3		0.00138937	MosB 24	0	0.484258	0	0	0.484258	1
MosB 25	Chr 12	99140750	SNV	C	A	EWC	100×WGS	0.179487	e-3		0.00313778	MosB 25	0.00124378	0.525268	0.00243605	0	0.525268	1
MosB 26	Chr 6	21434032	SNV	C	G	EWC	100×WGS	0.192661	a-3		0.000367475	MosB 26	0	0	0	0	0	0
MosB 28	Chr 15	54848437	SNV	T	G	EWC	100×WGS	0.235955	a-2		0.000789711	MosB 28	0	0.490141	0	0	0.490141	1
MosB 30	Chr 6	23822367	SNV	A	G	EWC	100×WGS	0.277228	a-1		0.00424049	MosB 30	0.00125945	0.520891	0.495268	0.522754	0.522754	3
MosB 31	Chr 4	21959891	SNV	C	T	EWC	100×WGS	0.342342	a-2		0.0035816	MosB 31	0.00472813	0.507899	0.00296296	0.00296956	0.507899	1
MosB 34	Chr 15	72448744	indel	GT	G	EWC	100×WGS	0.097561	ND		0.000837922	MosB 34	0	0	0.00116959	0	0.00116959	0
MosB 35	Chr 3	147251890	indel	GT	G	EWC	100×WGS	0.185714	a-3		7.20357e-05	MosB 35	0	0	0	0	0	0
MosB 37	Chr 6	129867463	SNV	G	C	EWC	100×WGS	0.075	g-2		0.000479482	MosB 37	0.000989609	0	0.508881	0.503953	0.508881	2
MosB 38	Chr 16	41786834	SNV	T	G	EWC	100×WGS	0.1	e-4		0.000699105	MosB 38	0.000814996	0.496798	0.000870322	0.000732601	0.496798	1
MosB 42	Chr 8	52004504	SNV	C	A	EWC	100×WGS	0.0746269	g-2		0.00659885	MosB 42	0.0046225	0.00327332	0.490506	0.489362	0.490506	2
MosB 43	Chr 10	123946087	SNV	C	T	EWC	100×WGS	0.193548	h-1		0.00319521	MosB 43	0.512097	0.00276625	0.00749064	0	0.512097	1
MosB 45	Chr 2	75787115	SNV	C	T	EWC	100×WGS	0.041	ND		0.0013719	MosB 45	0.00244499	0.00365854	0.00111607	0.00220994	0.00365854	0
MosB 62	Chr 1	145925285	SNV	A	G	noEWC	100×WGS	0.149123	e-3		0.00360699	MosB 62	0.00354191	0.493759	0.00342857	0.00250941	0.493759	1
MosB 82	Chr 14	86131940	SNV	G	A	noEWC	100×WGS	0.0666667	a-5		0.00247861	MosB 82	0.00218182	0.0041425	0.0015163	0.00135318	0.0041425	0
													1
[truncated: 45 more columns]

## Sheet: Mutations(ConC31)
Supplemental Data 1. List of mosaic mutations with their VAFs
Mosaic mutations and ther VAFs in mouse ConC31
	Chr	Pos		REF	ALT		WGS data	VAF in WGS_100×	Cell position	Note	VAFS in negative control		Cerebrum	Cerebellum	Skin(Shoulder)	Skin(Buttocks)	Stomach	Lung	Liver 1	Liver 2	Intestine	Pancreas	Glandular gland	Quadriceps	Tongue	Heart	Spleen	Kidney	Testis1-1	Testis1-2	Testis2-1	Testis2-2	Sperm	Tail-youth	Tail	Tail 8week	Tail 12week	Somatic average	Germ average	Total average	No offspring	Freq offspring	Tail 1:1 (diluted)	Tail 1:3 (diluted)	Tail 1:7 (diluted)	Tail 0:1 (negative con)	Sperm (negative con)	Max VAF	Min VAF
MosC 2	Chr 1	100654069	SNV	G	A	EWC	100×WGS	0.30303	a-1		0.000887408	MosC 2	0.276886	0.229758	0.367651	0.396609	0.362984	0.301607	0.197197	0.336022	0.338752	0.198338	0.269003	0.283054	0.309184	0.33941	0.331239	0.263816	0.291651	0.296109	0.333551	0.306169	0.315523	0.315617	0.264649	0.32219	0.284344	0.298987	0.308601	0.301077	11	0.215686	0.158263	0.0849066	0.0386208	0	0	0.396609	0.197197
MosC 3	Chr 1	124010062	SNV	G	A	EWC	100×WGS	0.0555556	e-2		0.0044762	MosC 3	0.105585	0.115986	0.0512818	0.0323362	0.063099	0.058451	0.188836	0.0992656	0.0671136	0.262633	0.106784	0.0576993	0.0534908	0.0753349	0.0419634	0.0879205	0.183375	0.167071	0.135251	0.150986	0.174846	0.0627861	0.097328	0.0665066	0.07577	0.0904385	0.162306	0.106062	10	0.196078	0.0578076	0.0282328	0.0131518	0	0	0.262633	0.0323362
MosC 4	Chr 1	130818778	SNV	C	T	EWC	100×WGS	0.0510204	d-3		0.00116791	MosC 4	0.0455661	0.0517396	0.0574062	0.0678194	0.0983427	0.00937525	0.0386571	0.0592312	0.052511	0.0342362	0.0291734	0.0430315	0.0431828	0.0258523	0.0220427	0.0768166	0.00636524	0.00834151	0.00981407	0.0141974	0.000643923	0.0634443	0.0407122	0.0595096	0.044191	0.04773	0.00787242	0.0390653	0	0	0.0225748	0.0113052	0.00716089	0	0	0.0983427	0.000643923
MosC 6	Chr 1	148821870	SNV	C	G	EWC	100×WGS	0.0425532	d-3		0.000918646	MosC 6	0.0487942	0.0593149	0.0628908	0.0721307	0.100382	0.00853136	0.04126	0.0592171	0.0626972	0.0334879	0.0262218	0.0413589	0.0462761	0.0294014	0.0220934	0.082826	0.0070025	0.0100933	0.0110377	0.0138428	0.000787737	0.0700843	0.0415909	0.0628291	0.0435536	0.0504755	0.00855281	0.0413619	0	0	0.023665	0.0118841	0.00437068	0	0	0.100382	0.000787737
MosC 8	Chr 2	87573610	SNV	A	C	EWC	100×WGS	0.0681818	e-2	High VAF in negative control	0.0208285	MosC 8	0.0852343	0.0912674	0.0433291	0.0277399	0.0526661	0.0472761	0.1601	0.0832437	0.0528444	0.215068	0.0871414	0.0495507	0.0448408	0.061056	0.0305502	0.0784568	0.156091	0.137374	0.106258	0.124613	0.151143	0.0573716	0.0778446	0.05293	0.0633311	0.0747545	0.135096	0.0878721	10	0.196078	0.0444837	0.0247703	0.0111233	0	0	0.215068	0.0277399
MosC 9	Chr 3	59038529	SNV	G	A	EWC	100×WGS	0.0888889	g-3		0.000966288	MosC 9	0.0891585	0.0862862	0.0554903	0.0508124	0.0623016	0.114112	0.0510176	0.0612325	0.0792525	0.028763	0.107882	0.0916501	0.0877373	0.0546896	0.0952437	0.111084	0.00956262	0.00968877	0.0170915	0.0266951	0.00309808	0.0963719	0.0995817	0.0900723	0.0973633	0.079037	0.0132272	0.0647305	0	0	0.0555677	0.0312	0.0140607	0	0	0.114112	0.00309808
MosC 10	Chr 3	71549988	SNV	G	A	EWC	100×WGS	0.04	e-2		0.0013612	MosC 10	0.108563	0.119649	0.0557675	0.0362242	0.0683812	0.0590086	0.192672	0.107115	0.0602544	0.265467	0.108227	0.0629853	0.0578674	0.0775258	0.0455858	0.0881493	0.182689	0.167936	0.135606	0.154575	0.175545	0.0657277	0.0902483	0.0644219	0.078516	0.0927456	0.16327	0.108077	7	0.137255	0.0553802	0.031266	0.0140249	0	0	0.265467	0.0362242
MosC 11	Chr 4	13334924	SNV	G	A	EWC	100×WGS	0.08	c-3		0.000548847	MosC 11	0.12812	0.0613187	0.129956	0.11508	0.0720044	0.160235	0.0790822	0.114833	0.0622666	0.0503809	0.113984	0.093186	0.134533	0.112129	0.185366	0.0898965	0.0151255	0.0188029	0.0188156	0.0175197	0.00257957	0.0868477	0.0970806	0.0973066	0.0912958	0.104795	0.0145687	0.0851802	0	0	0.0551878	0.0287763	0.0123272	0	0	0.185366	0.00257957
MosC 12	Chr 4	23886338	SNV	T	C	EWC	100×WGS	0.12766	c-3		0.00367452	MosC 12	0.123226	0.0683327	0.125853	0.115254	0.0729994	0.153915	0.0788179	0.115486	0.0530193	0.0522861	0.108926	0.0848988	0.135619	0.112078	0.178964	0.096939	0.0146461	0.0200514	0.0174279	0.0172164	0.00190078	0.0819004	0.0900129	0.0960697	0.0912279	0.102696	0.0142485	0.0834683	0	0	0.0546108	0.0301662	0.0123119	0	0	0.178964	0.00190078
MosC 14	Chr 4	33960413	SNV	C	T	EWC	100×WGS	0.197368	a-2		0.000726551	MosC 14	0.113581	0.10837	0.175506	0.212663	0.195928	0.140948	0.0925458	0.171191	0.232339	0.110665	0.123362	0.151472	0.127589	0.206863	0.131516	0.101066	0.267353	0.27844	0.318036	0.280143	0.319474	0.174243	0.138744	0.164578	0.146801	0.150477	0.292689	0.181393	18	0.352941	0.078129	0.0430339	0.0180275	0	0	0.319474	0.0925458
MosC 15	Chr 4	54234247	SNV	G	A	EWC	100×WGS	0.0917431	g-2		0.00130349	MosC 15	0.112759	0.15037	0.0819254	0.067965	0.0665619	0.131564	0.100004	0.063377	0.0857091	0.0333248	0.118744	0.154282	0.136102	0.0776847	0.121495	0.139351	0.0204483	0.0229126	0.0224528	0.036267	0.0036342	0.119209	0.132967	0.106163	0.141063	0.105189	0.021143	0.0869178	0	0	0.077643	0.0403734	0.0202843	0	0	0.154282	0.0036342
MosC 16	Chr 4	65972739	SNV	C	T	EWC	100×WGS	0.0537634	e-2		0.000867099	MosC 16	0.107966	0.121216	0.0543723	0.0369714	0.0678416	0.0611285	0.196004	0.104209	0.0713526	0.266858	0.113181	0.0620712	0.0548855	0.0807638	0.0446639	0.0872317	0.189644	0.170048	0.136681	0.153748	0.182624	0.0650617	0.0966735	0.0664207	0.0763731	0.094025	0.166549	0.109791	8	0.156863	0.0576509	0.0293549	0.0148051	0	0	0.266858	0.0369714
MosC 17	Chr 4	69459480	SNV	T	A	EWC	100×WGS	0.0932203	d-3		0.000304721	MosC 17	0.0487207	0.0552375	0.0581817	0.0647831	0.0983893	0.00793487	0.0383477	0.0543582	0.0575801	0.0329905	0.0284983	0.041323	0.0430537	0.0250838	0.0210963	0.0796775	0.00719863	0.0103123	0.00868071	0.0131419	0.000547055	0.0627115	0.0399862	0.0592031	0.0438394	0.0476641	0.00797612	0.0390363	0	0	0.0230046	0.0109763	0.00508823	0	0	0.0983893	0.000547055
MosC 18	Chr 4	96812294	SNV	C	A	EWC	100×WGS	0.0471698	d-3		0.00071533	MosC 18	0.0474023	0.0549649	0.0606876	0.0689923	0.104355	0.0107563	0.0366973	0.0571794	0.0556379	0.0337479	0.0305121	0.043232	0.0478808	0.0287166	0.0232534	0.0789324	0.00770602	0.010293	0.00977703	0.0134574	0.000378319	0.0672891	0.0409128	0.0637742	0.0460186	0.0495084	0.00832236	0.0405549	0	0	0.024151	0.0125353	0.00540321	0	0	0.104355	0.000378319
MosC 19	Chr 4	133438457	SNV	C	T	EWC	100×WGS	0.390625	a-1		0.00109242	MosC 19	0.279886	0.225268	0.364297	0.382361	0.366801	0.303757	0.204494	0.333912	0.33888	0.198615	0.260296	0.278831	0.304316	0.338088	0.326878	0.272543	0.286096	0.307609	0.335333	0.3096	0.313989	0.322392	0.268205	0.316826	0.278661	0.298323	0.310526	0.300976	19	0.372549	0.156801	0.0875725	0.0383617	0	0	0.382361	0.198615
MosC 23	Chr 6	99684612	SNV	G	T	EWC	100×WGS	0.0454545	ND		0.00430089	MosC 23	0.00611521	0.0179444	0.00969521	0.0483445	0.0204415	0.0244072	0.0102568	0.00732748	0.0167984	0.0494908	0.0376811	0.0310941	0.0254372	0.0329526	0.0363081	0.0128103	0.00331761	0.00326399	0.00189609	0.0017849	0.00388316	0.0265254	0.0162873	0.0261316	0.0159463	0.0238843	0.00282915	0.0193071	0	0	0.00844015	0.00480406	0.00247814	0	0	0.0494908	0.0017849
MosC 26	Chr 7	28171943	SNV	G	A	EWC	100×WGS	0.109756	a-3		0.00131075	MosC 26	0.073202	0.0841208	0.118582	0.108963	0.133836	0.122577	0.0458134	0.123484	0.158361	0.103485	0.096673	0.099109	0.0891082	0.141334	0.0875389	0.042808	0.256476	0.263257	0.298652	0.264595	0.305185	0.123743	0.0893609	0.1197	0.0911741	0.102339	0.277633	0.140446	15	0.294118	0.0537031	0.0292082	0.0125093	0	0	0.305185	0.042808
MosC 27	Chr 7	89164333	SNV	C	T	EWC	100×WGS	0.0987654	c-3		0.00127785	MosC 27	0.120412	0.0663387	0.13047	0.117239	0.074931	0.152741	0.0736517	0.113379	0.0561276	0.0514709	0.111425	0.089886	0.137667	0.115272	0.229774	0.0969849	0.0133117	0.0181198	0.0167768	0.0169262	0.00284411	0.084926	0.0919471	0.0944102	0.0909515	0.106369	0.0135957	0.086201	0	0	0.0536116	0.0285359	0.0148079	0	0	0.229774	0.00284411
MosC 28	Chr 8	41684566	SNV	A	G	EWC	100×WGS	0.182927	e-1		0.00563887	MosC 28	0.225948	0.269774	0.140116	0.113569	0.136353	0.193271	0.300372	0.16706	0.157617	0.298974	0.235163	0.223551	0.193503	0.160406	0.177452	0.229034	0.21347	0.192858	0.162923	0.190032	0.187696	0.178342	0.235896	0.172862	0.220136	0.202022	0.189396	0.199277	10	0.196078	0.130037	0.0707142	0.0346934	0	0	0.300372	0.113569
MosC 30	Chr 8	53296152	SNV	A	G	EWC	100×WGS	0.0449438	ND		0.00183816	MosC 30	0.000627293	4.28719e-05	0.000252897	0.000405857	0.000529454	0.000280019	0.0006373	-0.000975954	0.000317503	-0.000136227	-0.000409823	0.000328633	0.000466574	9.4316e-05	0.000357767	0.000143757	0.00174541	0.000505178	0.000382206	0.000102247	-4.87475e-05	0.00740454	0.00367901	0.0112767	0.00292998	0.000780321	0.000537259	0.000727482	0	0	0.00213533	0.00174646	0.00083849	0	0	0.0112767	-0.000975954
MosC 32	Chr 8	94623337	SNV	T	C	EWC	100×WGS	0.0576923	b-3		0.00251764	MosC 32	0.0389735	0.020647	0.0618131	0.103305	0.0573334	0.0256588	0.0404956	0.0402107	0.0695085	0.0103107	0.030377	0.0537801	0.0355045	0.0563546	0.0370603	0.0562272	0.00966466	0.00768931	0.00615387	0.00695732	0.00205019	0.0489238	0.0435643	0.0444032	0.0496579	0.0461138	0.00650307	0.0375028	0	0	0.0278795	0.0149516	0.00730715	0	0	0.103305	0.00205019
MosC 33A	Chr 8	109983714	SNV	T	A	EWC	100×WGS	0.346154	a-1		0.000436276	MosC 33A	0.271768	0.216919	0.352045	0.37876	0.352836	0.292593	0.191439	0.326316	0.342077	0.189944	0.259495	0.275905	0.297209	0.331902	0.292414	0.263356	0.280481	0.292651	0.327153	0.297202	0.307219	0.30525	0.260844	0.315281	0.26516	0.288948	0.300941	0.291556	20	0.392157	0.149403	0.0805544	0.0390215	0	0	0.37876	0.189944
MosC 33C	Chr 8	109983714	SNV	T	C	EWC	100×WGS	0.125	e-1		0.00467039	MosC 33C	0.222524	0.275289	0.137513	0.104916	0.137976	0.197888	0.299323	0.170999	0.154537	0.302493	0.234205	0.219686	0.193435	0.155683	0.181492	0.223749	0.212729	0.193414	0.164047	0.190804	0.181683	0.185534	0.23848	0.177163	0.219042	0.201985	0.188535	0.199061	9	0.176471	0.133356	0.0731107	0.0332372	0	0	0.302493	0.104916
MosC 40	Chr 10	101367929	SNV	C	T	EWC	100×WGS	0.0952381	g-2		0.00249713	MosC 40	0.109036	0.155255	0.0821127	0.0702446	0.0655716	0.130839	0.098979	0.060878	0.0898278	0.0331833	0.119185	0.158106	0.136518	0.0778212	0.109529	0.134785	0.0193533	0.021905	0.0236762	0.0356018	0.00360933	0.11419	0.133676	0.105912	0.139356	0.10443	0.0208291	0.0862558	0	0	0.076337	0.0421983	0.0174256	0	0	0.158106	0.00360933
MosC 41	Chr 11	104607828	SNV	C	G	EWC	100×WGS	0.15873	a-2		0.0010597	MosC 41	0.111188	0.104842	0.173369	0.20677	0.185652	0.148191	0.0849491	0.166407	0.230283	0.110899	0.12894	0.146731	0.127354	0.198113	0.135989	0.0969541	0.273076	0.287833	0.307044	0.287002	0.307841	0.170178	0.131506	0.170886	0.140229	0.147684	0.292559	0.179179	19	0.372549	0.0760026	0.0416002	0.0166673	0	0	0.307841	0.0849491
MosC 44	Chr 13	48081740	SNV	T	A	EWC	100×WGS	0.0576923	e-2		0.000364818	MosC 44	0.106733	0.115442	0.0534843	0.034475	0.0662405	0.0584261	0.196321	0.104366	0.0652206	0.258648	0.10729	0.0593234	0.0543613	0.0764914	0.0430182	0.0857048	0.18612	0.171803	0.135999	0.152742	0.179628	0.0692348	0.0925801	0.0627361	0.0755423	0.09152	0.165258	0.10755	8	0.156863	0.0543589	0.029859	0.0131716	0	0	0.258648	0.034475
MosC 45	Chr 13	48503783	SNV	A	G	EWC	100×WGS	0.0666667	e-3		0.00342622	MosC 45	0.0214895	0.00869764	0.00600997	0.00502151	0.00579757	0.0062773	0.0575299	0.021501	0.0352318	0.197472	-0.000563623	0.0145918	0.0101023	0.0211317	0.00104948	0.0161872	0.1689	0.00271284	0.0532026	0.0694251	0.087136	0.0239494	0.02991	0.0162198	0.0167759	0.0267437	0.0762753	0.0375114	3	0.0588235	0.017869	0.00992245	0.00447553	0	0	0.197472	-0.000563623
MosC 46	Chr 13	82363212	SNV	C	A	EWC	100×WGS	0.039604	ND		0.000774458	MosC 46	0.0384336	0.0477398	0.0209289	0.0183252	0.0298208	0.0767078	0.0393569	0.0126423	0.033591	0.0124359	0.0554022	0.0215018	0.0281536	0.0420668	0.043514	0.0326061	0.00439556	0.00527796	0.00549981	0.00591458	0.00194893	0.0573032	0.0310851	0.0486809	0.0310086	0.0356453	0.00460737	0.0288979	0	0	0.0191392	0.0108455	0.00467877	0	0	0.0767078	0.00194893
MosC 47	Chr 13	86043856	SNV	T	C	EWC	100×WGS	0.0673077	d-3		0.0046483	MosC 47	0.0475847	0.0545599	0.0564545	0.0627503	0.097906	0.00914856	0.0360335	0.0543633	0.0590453	0.0344459	0.0280697	0.039957	0.044128	0.0308136	0.0258809	0.0776269	0.00797236	0.0101577	0.00913913	0.0145753	0.000710001	0.0631898	0.0382101	0.058768	0.0436544	0.0477871	0.00851089	0.0392488	0	0	0.0228437	0.0119621	0.00663323	0	0	0.097906	0.000710001
MosC 49	Chr 14	63058987	SNV	G	A	EWC	100×WGS	0.0531915	e-2		0.00188126	MosC 49	0.108111	0.123723	0.0573912	0.0333623	0.0676268	0.0621392	0.192351	0.103553	0.0739468	0.264031	0.110823	0.0603735	0.0535799	0.0784048	0.0412461	0.0888525	0.19346	0.168425	0.135368	0.152899	0.18392	0.0672174	0.0956724	0.0656229	0.0775542	0.0934669	0.166814	0.109412	7	0.137255	0.053605	0.0293502	0.0147313	0	0	0.264031	0.0333623
MosC 51	Chr 15	29487549	SNV	A	T	EWC	100×WGS	0.165049	c-2		0.000526694	MosC 51	0.170781	0.124448	0.184891	0.185219	0.172716	0.16327	0.116765	0.174433	0.11753	0.0845273	0.139777	0.132223	0.187639	0.14957	0.187619	0.170044	0.020452	0.0309494	0.0295253	0.0344506	0.00408472	0.150618	0.133763	0.160011	0.14096	0.152546	0.0238924	0.124578	0	0	0.0812208	0.042797	0.0186285	0	0	0.187639	0.00408472
MosC 52	Chr 15	86468203	SNV	C	T	EWC	100×WGS	0.185484	g-2		0.00110876	MosC 52	0.110838	0.151371	0.0802303	0.0683163	0.065949	0.132523	0.100469	0.0601747	0.085078	0.0331257	0.120452	0.155496	0.130468	0.0787472	0.111132	0.130863	0.0193926	0.0209936	0.0222741	0.0327177	0.00317391	0.116603	0.134393	0.105219	0.137277	0.103679	0.0197104	0.0854252	0	0	0.0768594	0.0421833	0.0189676	0	0	0.155496	0.00317391
MosC 53	Chr 16	96593359	SNV	G	A	EWC	100×WGS	0.0875	c-3		0.0013545	MosC 53	0.122443	0.0684282	0.132407	0.117233	0.0768253	0.156145	0.076712	0.115492	0.0509492	0.052843	0.109993	0.0856847	0.141435	0.114227	0.174712	0.0991728	0.0134258	0.0216168	0.0186345	0.0178739	0.00205536	0.0872267	0.0956276	0.0940903	0.091513	0.104309	0.0147213	0.0848332	0	0	0.0548952	0.0298604	0.012976	0	0	0.174712	0.00205536
MosC 54	Chr 17	19461459	SNV	C	T	EWC	100×WGS	0.0531915	d-3		0.000504541	MosC 54	0.0438372	0.0498374	0.0536669	0.0628786	0.0937831	0.00924647	0.0363612	0.047637	0.0535626	0.0319622	0.0261711	0.0374838	0.0417927	0.026782	0.0183842	0.0701268	0.00602514	0.0103415	0.007642	0.014647	0.000565828	0.0578741	0.037303	0.0583179	0.0427555	0.0443717	0.00784428	0.036431	0	0	0.0202894	0.0131386	0.00553257	0	0	0.0937831	0.000565828
MosC 55	Chr 17	54646345	SNV	T	C	EWC	100×WGS	0.0545455	ND		0.00494328	MosC 55	0.00813099	0.00076688	0.00748659	0.00554801	0.00216688	0.0032582	0.00166293	0.000899889	0.00334202	0.00701351	0.00927461	0.0114324	0.00724061	0.00191415	0.00826043	0.0140812	0.00201486	0.00190912	0.00140917	0.00124077	2.65225e-05	0.0284684	0.00930523	0.0265111	0.00903578	0.00723627	0.00132009	0.00595015	0	0	0.00586136	0.00311561	0.00148897	0	0	0.0284684	2.65225e-05
MosC 57	Chr 19	52141357	SNV	T	C	EWC	100×WGS	0.043956	ND		0.00553298	MosC 57	0.000523105	0.000416516	0.000366068	0.000192553	0.00134303	-0.00057053	0.00161866	0.000782593	0.00096589	0.000435756	0.000588868	0.00120103	0.0010488	-0.000259085	0.00148467	0.00119052	0.000758834	-9.57511e-05	0.00103326	0.000314057	0.000308454	0.0154066	0.00611986	0.0104066	0.001644	0.00182527	0.00046377	0.00152929	0	0	0.00466352	0.00235538	0.00137008	0	0	0.0154066	-0.00057053
MosC 62	Chr 10	31906029	INDEL	T	TA	EWC	100×WGS	0.113636	c-3	indel	0.00116765	MosC 62	0.101166	0.0569759	0.109888	0.0956505	0.0644702	0.123786	0.0689184	0.0945161	0.050673	0.0477776	0.0958639	0.0777172	0.112487	0.0982198	0.129993	0.0804496	0.0119302	0.0183613	0.0171309	0.0172032	0.00208394	0.0754894	0.0803272	0.0840357	0.0773866	0.0869094	0.0133419	0.0709165	0	0	0.0444623	0.0245077	0.0111555	0	0	0.129993	0.00208394
MosC 71	Chr 3	74485640	SNV	C	A	noEWC	100×WGS	0.0645161	g-2		0.000266188	MosC 71	0.117293	0.150942	0.0844214	0.0692419	0.065089	0.130864	0.100854	0.061955	0.0908541	0.0325614	0.118192	0.155488	0.132552	0.0734599	0.123938	0.131845	0.0176301	0.0203587	0.0230625	0.0356286	0.00410336	0.115757	0.133434	0.109069	0.138713	0.10493	0.0201567	0.086501	0	0	0.07692	0.0431029	0.0171508	0	0	0.155488	0.00410336
MosC 72	Chr 3	136328074	SNV	G	A	noEWC	100×WGS	0.152941	a-3		0.000995733	MosC 72	0.0732612	0.0838612	0.114195	0.111154	0.133418	0.118209	0.0466509	0.124875	0.161925	0.105512	0.0954508	0.0963842	0.0886881	0.147308	0.099926	0.0440149	0.256114	0.266622	0.30402	0.269153	0.309717	0.122209	0.0941624	0.128709	0.0923059	0.1034	0.281125	0.142036	14	0.27451	0.0522008	0.0278018	0.0142551	0	0	0.309717	0.0440149
MosC 80	Chr 10	44856767	SNV	T	A	EWC	100×WGS	0.198473	c-2		0.000442765	MosC 80	0.16493	0.11963	0.183709	0.180448	0.174321	0.158186	0.116161	0.166576	0.108067	0.086385	0.142097	0.128632	0.18306	0.142009	0.186796	0.16768	0.019508	0.0296692	0.0264413	0.0331619	0.00282301	0.151771	0.135141	0.157206	0.13978	0.149756	0.0223207	0.122052	0	0	0.0761116	0.0435138	0.0191846	0	0	0.186796	0.00282301
													1
Genotyping results of the offspring
													Spouse #1	Spouse #2	F1 of #2	F1 of #2	F1 of #2	F1 of #2	F1 of #2	F1 of #2	F1 of #2	F1 of #2	F1 of #2	F1 of #2	F1 of #1	F1 of #1	F1 of #1	F1 of #2	F1 of #2	F1 of #2	F1 of #2	IVF	IVF	IVF	IVF	IVF	IVF	IVF	IVF	IVF	IVF	IVF	IVF	IVF	IVF	IVF	IVF	IVF	IVF
	CHR	POS		REF	ALT			VAF in WGS_100×	Cell position	Note	VAFS in negative control		ConC31-1012f1	ConC31-1012f3	ConC32-0112m1	ConC32-0112f1	ConC32-0218m1	ConC32-0218m2	ConC32-0218m3	ConC32-0218m4	ConC32-0218m5	ConC32-0218m6	ConC32-0218f1	ConC32-0218f2	ConC32-0501m1	ConC32-0501m2	ConC32-0501m3	ConC32-0901m1	ConC32-0901m2	ConC32-0901f1	ConC32-0901f2	ConC31-pup1	ConC31-pup2	ConC31-pup3	ConC31-pup4	ConC31-pup5	ConC31-pup6	ConC31-pup7	ConC31-pup8	ConC31-pup9	ConC31-pup10	ConC31-pup11	ConC31-pup12	ConC31-pup13	ConC31-pup14	ConC31-pup15	ConC31-pup16	ConC31-pup17	ConC31-pup18
MosC 2	Chr 1	100654069	SNV	G	A	EWC	100×WGS	0.30303	a-1		0.000887408	MosC 2	0.000987654	0.000831947	0.000722282	0	0.000921659	0	0.529342	0.00179614	0.479931	0	0.000755858	0.478924	0.000465333	0.0012285	0.000425351	0.509936	0.493218	0.498752	0.00130152	0	0.00141945	0.000474158	0	0	0.0014771	0	0.000355872	0.499803	0	0.000437445	0.00070373	0.000794913	0	0.000819672	0.50382	0.000350508	0.513233
MosC 3	Chr 1	124010062	SNV	G	A	EWC	100×WGS	0.0555556	e-2		0.0044762	MosC 3	0.00232288	0.00326087	0.00266904	0.530048	0.00105932	0	0.00100301	0.00380228	0.0010627	0.00196078	0.463542	0.00102775	0.00439883	0.488784	0.460166	0.00104822	0.00830565	0.00363306	0.492701	0.00241838	0.0011919	0.00259067	0.00238949	0.00114155	0.00346821	0.00219058	0.00227015	0.00110865	0.481681	0.00238949	0.0010989	0.0020202	0.489649	0	0	0.00411523	0
MosC 4	Chr 1	130818778	SNV	C	T	EWC	100×WGS	0.0510204	d-3		0.00116791	MosC 4	0.00214592	0.00330688	0.000507872	0.00208044	0.00124766	0	0.00116414	0	0.00387097	0.000554631	0.00062422	0.00113636	0.00143575	0	0.00127959	0	0.00163132	0	0.00126024	0.00107296	0.000569801	0.00291886	0.00118977	0.00107875	0.0010917	0.00110558	0.00219298	0.000616143	0.00057241	0.00190597	0.00100251	0.00159405	0.00142721	0	0.00152207	0.00208225	0
MosC 6	Chr 1	148821870	SNV	C	G	EWC	100×WGS	0.0425532	d-3		0.000918646	MosC 6	0.000909918	0.000450248	0	0.00445545	0.00207125	0	0	0.000302939	0.000357654	0.00124805	0.00118437	0.0009431	0.00280584	0.000970874	0.000447227	0	0.00381679	0	0.00104275	0	0.00197824	0.00384193	0.00196271	0	0.0029511	0.00127173	0	0	0.003327	0	0.00181884	0.000371471	0.000684463	0	0.0010929	0.000746547	0.000588235
MosC 8	Chr 2	87573610	SNV	A	C	EWC	100×WGS	0.0681818	e-2	High VAF in negative control	0.0208285	MosC 8	0.0324675	0.0250482	0.0269006	0.31753	0.320486	0.025	0.0237752	0.0244264	0.0238257	0.0242608	0.302676	0.0211566	0.0220299	0.317677	0.322725	0.014974	0.0198537	0.0209351	0.0230525	0.0218732	0.0233178	0.316785	0.0198973	0.0255991	0.0267247	0.325087	0.0222947	0.0240572	0.0246418	0.319527	0.0226886	0.0142772	0.025	0.320219	0.016092	0.0284464	0.0184237
MosC 9	Chr 3	59038529	SNV	G	A	EWC	100×WGS	0.0888889	g-3		0.000966288	MosC 9	0.000574053	0	0.00164541	0.00172513	0.00138122	0	0.000982801	0.00215169	0.00202532	0.00155925	0.0009298	0.000467946	0.000554324	0.0010005	0.00244379	0	0	0.000989609	0.0010015	0.000866927	0.00150981	0.00121065	0	0.000417014	0.00135318	0.00135563	0.000429185	0	0.000470367	0.00114745	0.00174596	0.00093985	0	0.00116754	0.001207	0.000439754	0.000730994
MosC 10	Chr 3	71549988	SNV	G	A	EWC	100×WGS	0.04	e-2		0.0013612	MosC 10	0.00176991	0.00189753	0.00115607	0.00153846	0.529043	0	0.00127714	0.00202293	0.00136519	0.000726216	0.490814	0	0.00183655	0.00252313	0.520995	0.000641437	0	0.00167691	0.00272232	0.00359712	0.000865801	0	0.00352734	0.00210231	0.00142959	0.000582751	0	0.00121655	0	0.508921	0	0.506684	0.00279799	0.000716846	0.000951475	0.000682594	0
MosC 11	Chr 4	13334924	SNV	G	A	EWC	100×WGS	0.08	c-3		0.000548847	MosC 11	0	0	0.00833333	0	0.00952381	0.0294118	0	0	0.0105263	0	0	0	0	0	0	0	0	0	0	0	0	0	0	0	0	0	0	0	0	0	0	0	0	0	0	0	0
MosC 12	Chr 4	23886338	SNV	T	C	EWC	100×WGS	0.12766	c-3		0.00367452	MosC 12	0.00380614	0.00336842	0.00405597	0.0039185	0.00533463	0	0.00316313	0.00323142	0.00304348	0.00388305	0.00480769	0.00296209	0.00346449	0.00365631	0.00389779	0.00572363	0.00327273	0.004329	0.00362669	0.00215905	0.00444148	0.00343535	0.00225938	0.00208373	0.00215471	0.00204221	0.00358965	0.00444664	0.00363714	0.00498504	0.004662	0.00290243	0.00223414	0.00338983	0.004914	0.00361228	0.00471281
MosC 14	Chr 4	33960413	SNV	C	T	EWC	100×WGS	0.197368	a-2		0.000726551	MosC 14	0	0	0.509491	0	0.00290698	0.526718	0.474562	0	0.000942507	0.529026	0.00084246	0.000879507	0.512774	0.000823045	0.000840336	0	0.512616	0.518676	0.00299401	0.481584	0	0.00273723	0.00324412	0.524648	0.5363	0	0.00071582	0.492623	0.0014881	0	0.522589	0.000750188	0.00145455	0	0.00295567	0.00287563	0.508995
MosC 15	Chr 4	54234247	SNV	G	A	EWC	100×WGS	0.0917431	g-2		0.00130349	MosC 15	0.00279916	0.000581734	0.0014918	0.00136893	0.00174317	0.00938967	0.000547046	0.00121507	0	0.00171038	0.00165654	0.00245399	0	0.00180397	0.000617665	0.000617665	0.000899281	0.00220022	0.00128866	0.000491642	0.00220264	0.00285388	0.0010929	0.000529381	0.00152439	0.00110375	0.00103413	0.000547645	0.00103306	0.00172612	0.00369515	0.00368834	0.00139405	0.00158311	0.00279916	0.00148221	0.000768049
MosC 16	Chr 4	65972739	SNV	C	T	EWC	100×WGS	0.0537634	e-2		0.000867099	MosC 16	0.000869943	0.001404	0.00199137	0.00375059	0.000752445	0	0.00116324	0.00041806	0.000367782	0.00192234	0	0.000299581	0.000898473	0.505552	0.511208	0.00177494	0.00129534	0.00149365	0.00075188	0.00120337	0.000771903	0.00153139	0.00149198	0.000960922	0.000361402	0.491011	0.00104022	0.000917011	0.506572	0.00124378	0.00168805	0.00105559	0.504571	0.000752162	0.00374707	0.000649984	0.0024975
MosC 17	Chr 4	69459480	SNV	T	A	EWC	100×WGS	0.0932203	d-3		0.000304721	MosC 17	0	0	0.000349406	0	0	0	0.000408664	0	0	0	0.000798403	0	0	0	0.000403388	0.000760167	0	0	0	0	0.000409333	0.000525486	0.000378931	0	0	0.00041632	0	0.000819336	0	0	0.000329272	0	0.000742666	0	0.000486145	0.000322685	0
MosC 18	Chr 4	96812294	SNV	C	A	EWC	100×WGS	0.0471698	d-3		0.00071533	MosC 18	0.000539084	0.00216826	0.000763359	0.000558036	0.000963855	0	0.00186916	0.000471254	0.00048852	0.000922509	0.000392619	0.000879121	0.00105042	0	0.000896057	0.000865801	0.000693963	0.000448029	0.00200401	0.000676133	0.00251151	0.00165563	0.000419111	0.000366166	0.00122951	0.00133452	0	0.0017452	0.000383142	0.00142789	0.000360881	0.00198807	0.00122249	0.000429185	0.00221361	0.00149925	0.00113186
MosC 19	Chr 4	133438457	SNV	C	T	EWC	100×WGS	0.390625	a-1		0.00109242	MosC 19	0.00147493	0	0.495351	0.0021692	0.00129366	0	0.509496	0.00406229	0.494403	0.000608643	0.00164654	0.507289	0.000621118	0.00169683	0.00119332	0.52623	0.500496	0.482572	0.00176367	0.0019656	0.00120482	0.00157978	0.000513084	0.495296	0.000511247	0.00116822	0.524072	0.503679	0	0	0.000472813	0.00149402	0.000539665	0	0.511302	0.468106	0.000917431
MosC 23	Chr 6	99684612	SNV	G	T	EWC	100×WGS	0.0454545	ND		0.00430089	MosC 23	0.00613706	0.00813953	0.00608519	0.00793966	0.00720789	0.00684932	0.00587508	0.00963677	0.00262726	0.00527879	0.00755833	0.00630192	0.00595998	0.00441436	0.00392394	0.00288268	0.00546448	0.00766058	0.0061849	0.00660194	0.00978547	0.00663265	0.00638138	0.00375822	0.00795372	0.00653595	0.00507271	0.00434075	0.00873016	0.00404694	0.0077233	0.00297114	0.0070922	0.00566718	0.00294695	0.00463548	0.00323924
MosC 26	Chr 7	28171943	SNV	G	A	EWC	100×WGS	0.109756	a-3		0.00131075	MosC 26	0.00135501	0.0010582	0.502955	0.00209059	0.0013587	0	0.00116077	0.494595	0	0.00206897	0.000586166	0.498389	0.534936	0	0.00128041	0.505839	0.00263389	0.00225225	0.001693	0.513591	0.499658	0.00183655	0.00154321	0.0023488	0.505658	0.00206044	0.488567	0	0.00333056	0.00179856	0.50591	0	0.00338028	0.00146199	0.492929	0.498969	0.508949
MosC 27	Chr 7	89164333	SNV	C	T	EWC	100×WGS	0.0987654	c-3		0.00127785	MosC 27	0	0.0012747	0.00110284	0.00192456	0.00322675	0.000766284	0.00126984	0.00124031	0.000644745	0.00170532	0	0.00091352	0.00043535	0.00193573	0.00333704	0.00302318	0	0.00147232	0.00206398	0.000366032	0.00107759	0.00206271	0.00133976	0.000625782	0.000635122	0.00106667	0.000359066	0.00156838	0	0.00223214	0.00141143	0.000633513	0.000811688	0.00060241	0.00162075	0.00031211	0.003327
MosC 28	Chr 8	41684566	SNV	A	G	EWC	100×WGS	0.182927	e-1		0.00563887	MosC 28	0.00915751	0.0055788	0.0141677	0.525926	0.512072	0.0403226	0.0133745	0.00974026	0.00628272	0.0133983	0.499322	0.00475059	0.0110619	0.518868	0.0144462	0.0041841	0.00613497	0.00468933	0.475	0.01222	0.0108696	0.465011	0.0118421	0.0108025	0.00997151	0.00847458	0.00676819	0.0118644	0.00723327	0.0146789	0.00859599	0.507614	0.00236407	0.497403	0.0189394	0.00484653	0.00888889
MosC 30	Chr 8	53296152	SNV	A	G	EWC	100×WGS	0.0449438	ND		0.00183816	MosC 30	0	0.00740741	0.00151745	0.00672646	0.00510204	0	0.00482315	0	0	0.00165563	0.00162602	0.00160256	0.00263158	0.00437637	0.00199601	0.00472813	0.00282486	0.00191571	0.00666667	0.0019305	0.00202429	0.00194553	0.00207469	0.00756144	0.00207039	0.0019305	0.00186567	0.004	0.00184502	0.0039604	0.00175439	0	0.00314961	0.00753296	0.0021692	0.00163934	0.00507614
MosC 32	Chr 8	94623337	SNV	T	C	EWC	100×WGS	0.0576923	b-3		0.00251764	MosC 32	0.0017741	0.00206932	0.00496614	0.00126582	0.00287356	0	0.00243665	0.00279174	0.00318302	0.00228441	0.00385675	0.00178651	0.00102564	0.000445633	0.00144928	0.00472441	0.00235294	0.00247158	0.00149105	0.00262369	0.00263043	0.00208117	0.0034705	0.00138122	0.0034379	0.00194175	0.00308506	0.00162338	0.00307692	0.00106952	0.00215239	0.00298635	0.0017043	0.000890076	0.00183599	0.0012443	0.000544662
MosC 33A	Chr 8	109983714	SNV	T	A	EWC	100×WGS	0.346154	a-1		0.000436276	MosC 33A	0.000654879	0	0.476102	0.00122249	0.00200501	0.434343	0.00117302	0.481481	0.000559284	0.49	0.000540833	0.000544366	0	0.00112486	0.00420168	0.491015	0.000901713	0.506414	0.00206398	0.485275	0.0017094	0	0.00144578	0.500882	0.002001	0	0.492411	0	0.000902527	0.00222841	0.00083612	0.000956023	0.00142383	0.00320513	0.491049	0.5	0.000829187
MosC 33C	Chr 8	109983714	SNV	T	C	EWC	100×WGS	0.125	e-1		0.00467039	MosC 33C	0.00844704	0.00259471	0.0105171	0.5	0.00549451	0.0175439	0.00525701	0.00813008	0.0039019	0.0107759	0.00591716	0.00433839	0.00695762	0.536292	0.499736	0.0112936	0.00449236	0.00722394	0.00514403	0.0179153	0.00567537	0.511995	0.00432484	0.00788782	0.00498753	0.501124	0.0090535	0.00428036	0.00494382	0.00665557	0.00208768	0.00570885	0.00520095	0.507392	0.0136307	0.00522648	0.00577558
MosC 40	Chr 10	101367929	SNV	C	T	EWC	100×WGS	0.0952381	g-2		0.00249713	MosC 40	0	0.00110011	0.00105097	0	0	0	0.0014245	0.00146092	0.00254453	0.000665336	0.00118554	0	0	0.00116077	0.00180941	0.000648508	0	0	0.00179856	0.00106101	0.0020284	0.00127065	0.00111297	0.000592066	0	0.000637349	0.000545554	0.000554324	0	0	0.00108401	0.00184162	0.000535332	0.000603865	0.000738007	0.00110988	0.00178891
MosC 41	Chr 11	104607828	SNV	C	G	EWC	100×WGS	0.15873	a-2		0.0010597	MosC 41	0.0043573	0.00413223	0.47093	0	0.00429185	0.526316	0.517986	0.447284	0.00581395	0	0.0108108	0.485089	0.513725	0.00383142	0	0.505938	0.506438	0.501362	0.0035461	0.52994	0.541033	0.004329	0.00320513	0.486874	0.0027933	0	0.00308642	0.515464	0	0	0.501779	0	0.00273224	0.00763359	0.00694444	0.0114943	0.535
MosC 44	Chr 13	48081740	SNV	T	A	EWC	100×WGS	0.0576923	e-2		0.000364818	MosC 44	0.000558659	0.000990589	0.000446828	0	0.476578	0	0	0.00114482	0.00106045	0.000529661	0.48788	0.00053135	0.00119261	0.00093633	0.506244	0.000523286	0.00088968	0	0.511559	0.000383877	0.00142857	0	0.000896861	0.000894454	0.000466418	0.496218	0.000421763	0	0	0.00101471	0.0012931	0.463922	0.50088	0.50661	0.000608273	0.000866927	0.00131579
MosC 45	Chr 13	48503783	SNV	A	G	EWC	100×WGS	0.0666667	e-3		0.00342622	MosC 45	0.0042605	0.00395257	0.000824402	0.00246457	0.496706	0.00406504	0.00471921	0.00446207	0.00156822	0.00247647	0.00186047	0.00286396	0.00393258	0.00438169	0.000511509	0.00358056	0.00413223	0.00141243	0.483906	0.00215424	0.00378072	0.00375059	0.00342969	0.00355872	0.00124224	0.0026441	0.00406711	0.00162075	0.00376117	0.00205023	0.00166945	0.503567	0.00234009	0.00194932	0.00302297	0.00236742	0.00138408
MosC 46	Chr 13	82363212	SNV	C	A	EWC	100×WGS	0.039604	ND		0.000774458	MosC 46	0.00116686	0.00248385	0.00277906	0.00179533	0.00058548	0.0223464	0.00232423	0.00298507	0.0010983	0.0010917	0.00217155	0.00166297	0.00573723	0.00244499	0.00147131	0.00108992	0.00181324	0.00243309	0.00254323	0.00205761	0.00398804	0.00505051	0.00142045	0.00286123	0.000982318	0.00310881	0.000445831	0.000948317	0.00131234	0.00158395	0.00138376	0.00099108	0.00178891	0.00103573	0.00595948	0.00129534	0.0035791
MosC 47	Chr 13	86043856	SNV	T	C	EWC	100×WGS	0.0673077	d-3		0.0046483	MosC 47	0.00722022	0.00837908	0.00707177	0.00630564	0.00802139	0.00543478	0.00757576	0.00309811	0.00355872	0.00822639	0.00339079	0.00696662	0.00414365	0.00265655	0.00537428	0.00549451	0.00192031	0.00272777	0.00467091	0.00273973	0.00811966	0.00116009	0.00378237	0.00744153	0.00583791	0.00505051	0.00125104	0.00492264	0.00638751	0.00552486	0.00714554	0.0068741	0.00559754	0.00687285	0.00736067	0.00573833	0.00384369
MosC 49	Chr 14	63058987	SNV	G	A	EWC	100×WGS	0.0531915	e-2		0.00188126	MosC 49	0.0015361	0.00131579	0	0.00548446	0.00423729	0.0232558	0	0.0033389	0.00265957	0.00133333	0	0	0.00398406	0.00142857	0.00302572	0.00182482	0.00706714	0	0.00302572	0.00142857	0.00337838	0.464957	0.00136054	0.00146413	0	0.521664	0.00394218	0	0.496479	0	0	0.498965	0.0017301	0.535163	0	0.00151515	0.00232558
MosC 51	Chr 15	29487549	SNV	A	T	EWC	100×WGS	0.165049	c-2		0.000526694	MosC 51	0	0.00122699	0	0	0.00152439	0	0	0.0013947	0	0	0	0	0	0	0	0.00131062	0	0	0	0	0	0	0	0	0.00141443	0	0	0	0	0	0	0	0	0	0	0	0
MosC 52	Chr 15	86468203	SNV	C	T	EWC	100×WGS	0.185484	g-2		0.00110876	MosC 52	0.0014556	0	0.000962927	0.000655308	0.00209974	0	0.00149402	0.00114416	0	0	0.000558036	0.000571755	0.00260643	0.00295421	0.00222058	0.00164024	0	0.000509944	0.000677507	0.00253593	0	0.00267857	0.000981354	0.00060024	0.00236827	0.000496032	0	0.000538213	0.000623441	0.000722022	0.00129032	0.000574383	0.000469925	0.00116009	0.000881834	0.000627353	0.00100402
MosC 53	Chr 16	96593359	SNV	G	A	EWC	100×WGS	0.0875	c-3		0.0013545	MosC 53	0.00289645	0.00122549	0.00110926	0.00142146	0.00206897	0	0.000696379	0.00147059	0.00195312	0.0020339	0.00198544	0.00256246	0.00346021	0.00221976	0.000611247	0.00130039	0	0.00175336	0.00139762	0.00256279	0.00135501	0.00205339	0.00170843	0.00110988	0.00163488	0.00123916	0.00103681	0.00220872	0.000523013	0.00195059	0.00372936	0.0017585	0.0010989	0.000561482	0.00160772	0.00101163	0.000917431
MosC 54	Chr 17	19461459	SNV	C	T	EWC	100×WGS	0.0531915	d-3		0.000504541	MosC 54	0	0	0	0	0	0	0.000791766	0.00243902	0.000958773	0.000849618	0.000791139	0	0.00107296	0	0	0	0.00101833	0	0	0	0.00154919	0.00076864	0	0	0	0.000806452	0	0	0	0.000895255	0.000782473	0.000761035	0.00134048	0.000794913	0.000929368	0	0.00102775
MosC 55	Chr 17	54646345	SNV	T	C	EWC	100×WGS	0.0545455	ND		0.00494328	MosC 55	0.00311526	0.00702247	0.004	0.00165017	0.00242326	0.0215054	0.00184729	0.00429492	0.0042523	0.00232378	0.00376884	0.00712897	0.00295858	0.001287	0.00254291	0.00334225	0.00857449	0.00347021	0.00329164	0.00409207	0.00329128	0.00491918	0.00478469	0.00569801	0.0044618	0.00253325	0.0066482	0.0018315	0.00391937	0.00192184	0.00393314	0.00360268	0.00310078	0.00470865	0.0017301	0.00742312	0.000753012
MosC 57	Chr 19	52141357	SNV	T	C	EWC	100×WGS	0.043956	ND		0.00553298	MosC 57	0.00956938	0.00834106	0.0116525	0.00271739	0.00744417	0.0291005	0.00567644	0.0140351	0.0049456	0.00857843	0.0126449	0.00461894	0.0189474	0.00567108	0	0.00628272	0.0133136	0.00415973	0.00806452	0.00348432	0.00243902	0.00591716	0.00552486	0.00212314	0.0103306	0.00787402	0.00543478	0	0.013468	0	0.00457666	0.00232019	0	0.0026455	0.00598802	0.0102302	0
MosC 62	Chr 10	31906029	INDEL	T	TA	EWC	100×WGS	0.113636	c-3	indel	0.00116765	MosC 62	0.00126263	0.000586854	0.00147059	0.00126422	0	0	0.00125945	0.00135501	0.00119403	0.00176263	0.00115942	0.00175029	0.00192555	0	0.000588235	0	0.00199203	0	0.00117371	0.00135993	0.00104767	0	0.000506073	0.000544662	0.00153925	0	0	0	0.00097704	0.000569801	0.00253165	0.0010983	0.00101471	0	0.000728332	0.00140581	0
MosC 71	Chr 3	74485640	SNV	C	A	noEWC	100×WGS	0.0645161	g-2		0.000266188	MosC 71	0	0	0	0	0	0	0	0	0	0	0	0	0	0	0	0	0	0	0.00301205	0	0	0	0	0	0	0	0	0	0	0	0	0.00215517	0	0	0	0.00186567	0
MosC 72	Chr 3	136328074	SNV	G	A	noEWC	100×WGS	0.152941	a-3		0.000995733	MosC 72	0	0	0.00126743	0.00084246	0.00119689	0	0.00063857	0.00329164	0.485811	0.485177	0.0013986	0.000754148	0.464151	0.000971817	0.0010101	0.486864	0.00117925	0.00131579	0	0.00116686	0.002079	0	0.00210231	0.504795	0.00166667	0.00154799	0.511673	0.000870322	0.000948767	0.001002	0.00170648	0.00311769	0.00273038	0	0.492326	0.492241	0.00159744
MosC 80	Chr 10	44856767	SNV	T	A	EWC	100×WGS	0.198473	c-2		0.000442765	MosC 80	0.000606428	0.00108108	0.000847817	0.000568182	0.00103681	0	0.000469484	0.00146699	0.000537924	0.000492611	0.000472367	0	0.0011655	0.000538793	0.00108401	0.000990099	0.00219298	0	0.000576037	0.00133274	0.000484731	0.000959233	0.000911162	0.000922509	0	0.000940291	0.00174444	0	0.000946074	0.000970874	0.000858738	0	0.000805477	0.000463177	0.00126823	0.000863558	0.000691085
													1
[truncated: 18 more columns]

## Sheet: Mutations(ConD31)
Supplemental Data 1. List of mosaic mutations with their VAFs
Mosaic mutations and ther VAFs in mouse ConD31
	Chr	Pos		REF	ALT		WGS data	VAF in WGS_100×	Cell position	Note	VAFS in negative control		Cerebrum	Cerebellum	Skin(Shoulder)	Skin(Buttocks)	Stomach	Lung	Liver 1	Liver 2	Intestine	Pancreas	Glandular gland	Quadriceps	Tongue	Heart	Spleen	Kidney	Testis1-1	Testis1-2	Testis2-1	Testis2-2	Sperm	Tail-youth	Tail	Tail 8week	Somatic average	Germ ave	Total ave	No offspring	Freq offspring	Tail 1:1 (diluted)	Tail 1:3 (diluted)	Tail 1:7 (diluted)	Tail 0:1 (negative con)	Sperm (negative con)	Max VAF	Min VAF	Annotation by SnpEff
MosD 1	Chr 1	136327613	SNV	C	T	EWC	100×WGS	0.0458015	j-2		0.000664478	MosD 1	0.0646954	0.0426881	0.0586196	0.0479277	0.208474	0.0757224	0.0549289	0.108379	0.0739948	0.101015	0.0811443	0.0162726	0.0976626	0.0479842	0.0728237	0.0174387	0.00844222	0.00779704	0.0155144	0.0116451	0.00130467	0.0551459	0.054241	0.0482746	0.0710644	0.00894069	0.0575592	0	0	0.0286611	0.0172534	0.00631492	0	0	0.208474	0.00130467	downstream_gene_variant
MosD 2	Chr 1	138873847	SNV	G	C	EWC	100×WGS	0.0918367	e-2		0.000418532	MosD 2	0.0889217	0.10941	0.10981	0.0752749	0.0532729	0.0689481	0.0320479	0.0311769	0.112613	0.0307607	0.0815658	0.0430982	0.054678	0.0590241	0.046451	0.0842791	0.143393	0.149581	0.237456	0.0283527	0.117715	0.0714532	0.0716745	0.0556428	0.0680255	0.1353	0.0826503	5	0.0833333	0.0363192	0.015628	0.00920982	0	0	0.237456	0.0283527	downstream_gene_variant
MosD 5	Chr 2	56018049	SNV	G	A	EWC	100×WGS	0.11236	g-2		0.00168436	MosD 5	0.0604958	0.150967	0.0427964	0.0846754	0.0196695	0.0518013	0.0211589	0.0135733	0.0362512	0.0351765	0.0491962	0.0418816	0.0580601	0.0593626	0.0555737	0.01806	0.013184	0.018437	0.0690772	0.0683307	0.0451997	0.0799295	0.0527968	0.0822977	0.0517459	0.0428457	0.0498111	8	0.133333	0.0276585	0.0133519	0.00669623	0	0	0.150967	0.013184	intergenic_region
MosD 8	Chr 2	111942370	SNV	C	T	EWC	100×WGS	0.119403	d-2		0.0023005	MosD 8	0.141188	0.0973486	0.0841379	0.0983396	0.108673	0.111884	0.221141	0.147035	0.135515	0.126948	0.100737	0.183438	0.148988	0.150612	0.10994	0.12034	0.025672	0.0416049	0.0195111	0.021939	0.0179759	0.114951	0.109343	0.123507	0.128364	0.0253406	0.105968	0	0	0.054309	0.0281998	0.0125357	0	0	0.221141	0.0179759	downstream_gene_variant
MosD 9	Chr 2	122725286	SNV	T	G	EWC	100×WGS	0.0740741	a-3	High VAF in negative control	0.034531	MosD 9	0.0163365	0.0330612	0.0552812	0.0759373	0.0295524	0.0600213	0.0674018	0.0758996	0.0323936	0.0971657	0.0747958	0.0824813	0.0273406	0.0472188	0.0801734	0.070379	0.271057	0.224747	0.148119	0.300662	0.26617	0.0800494	0.0791838	0.0850768	0.0602596	0.242151	0.0998012	18	0.3	0.0375151	0.0187231	0.010529	0	0	0.300662	0.0163365	downstream_gene_variant
MosD 11	Chr 2	135155379	SNV	C	T	EWC	100×WGS	0.0454545	g-4*	Cell position determined by offspring	0.000659803	MosD 11	0.0176927	0.0319543	0.00889989	0.0263607	0.00591493	0.00391644	0.0050186	0.00692435	0.00810151	0.0145521	0.0217765	0.0165727	0.0126485	0.0208702	0.0135918	0.0080863	0.00753934	0.003222	0.0334761	0.00657292	0.012921	0.0322547	0.01613	0.0353662	0.0150703	0.0127463	0.0145651	2	0.0333333	0.00680418	0.00305893	0.00164541	0	0	0.0353662	0.003222	intron_variant
MosD 13	Chr 3	66473715	SNV	G	T	EWC	100×WGS	0.040404	ND		0.00327392	MosD 13	8.56535e-05	0.000127607	0.00021286	0.000422159	7.41059e-05	0.000375594	-7.49823e-06	-0.00142832	-8.96892e-05	0.000220081	0.000295821	0.00198791	0.00030172	-0.000127641	-0.000210403	0.00199684	0.00017495	-0.00124481	3.18348e-05	-0.00127477	0.000106843	0.0245464	0.0068713	0.0365994	0.0019808	-0.000441191	0.00145428	0	0	0.0041896	0.00214644	0.000767208	0	0	0.0365994	-0.00142832	intergenic_region
MosD 14	Chr 3	99914989	SNV	A	T	EWC	100×WGS	0.0952381	j-1		0.00145982	MosD 14	0.164027	0.0705608	0.17259	0.0986427	0.280921	0.151473	0.100843	0.154977	0.149991	0.165473	0.118647	0.0867022	0.181363	0.155869	0.188374	0.106773	0.0180379	0.0163674	0.0396907	0.021072	0.00168443	0.124415	0.135858	0.120049	0.144861	0.0193705	0.117581	0	0	0.0695803	0.0354024	0.0163592	0	0	0.280921	0.00168443	intron_variant
MosD 16	Chr 3	138886740	SNV	A	T	EWC	100×WGS	0.05	ND		0.000573203	MosD 16	5.19125e-05	-0.000144597	-2.65563e-05	0.0001261	0.00173567	0.000156435	0.00793936	-0.000201732	0.000327569	0.00152848	0.000128791	9.04773e-05	0.000125662	5.64954e-05	0.000490745	5.65307e-05	-5.26199e-05	-0.000150306	0.000104002	-0.000152726	4.06523e-06	0.00819088	0.00173203	0.00721544	0.00124246	-4.95169e-05	0.000961594	0	0	0.00128708	0.000299741	0.00019814	0	0	0.00819088	-0.000201732	intron_variant
MosD 19	Chr 4	76849980	SNV	C	T	EWC	100×WGS	0.154639	g-3*	Cell position determined by offspring	0.00326026	MosD 19	0.0232069	0.0367148	0.00907785	0.0352782	0.00748472	0.0167587	0.00919165	0.00728665	0.0159492	0.0148794	0.0260983	0.023992	0.0153474	0.0320737	0.0170541	0.0125051	0.00887057	0.00974431	0.0362647	0.0120325	0.0134626	0.0430839	0.0265453	0.0493411	0.020696	0.0160749	0.0196914	2	0.0333333	0.0157288	0.00725231	0.0031767	0	0	0.0493411	0.00728665	intron_variant
MosD 20	Chr 4	88430829	SNV	T	G	EWC	100×WGS	0.059322	j-3		0.0007357	MosD 20	0.0689281	0.0217851	0.047741	0.0439578	0.140608	0.0553483	0.051494	0.0614532	0.0700919	0.102691	0.0360411	0.00917924	0.096419	0.0270822	0.0705544	0.0162198	0.00558606	0.00762576	0.00629269	0.0133212	0.000908073	0.0447388	0.0493187	0.0414806	0.056314	0.00674676	0.0455385	0	0	0.02703	0.012084	0.00601464	0	0	0.140608	0.000908073	intron_variant
MosD 21	Chr 4	117318438	SNV	A	G	EWC	100×WGS	0.0704225	e-2		0.00551767	MosD 21	0.0760492	0.102393	0.0937322	0.0679891	0.0490033	0.0646397	0.0312804	0.032012	0.10053	0.0322357	0.0744839	0.0390403	0.0510965	0.0570365	0.0466033	0.0770845	0.120956	0.148413	0.194143	0.0270585	0.11814	0.0706107	0.0624472	0.0564838	0.0626815	0.121742	0.0755208	4	0.0666667	0.0357615	0.0158057	0.00771672	0	0	0.194143	0.0270585	intron_variant
MosD 22	Chr 4	135452915	SNV	G	A	EWC	100×WGS	0.0487805	ND		0.000701282	MosD 22	4.40345e-05	-5.093e-05	-0.000145043	-7.69513e-05	0.000104929	0.000156503	5.65466e-05	-6.04409e-05	4.41417e-05	-0.000149087	-6.76503e-05	2.73861e-06	-2.79684e-05	0.000183023	-2.89138e-05	-1.11171e-05	0.000105065	-6.31437e-05	6.66329e-06	-1.42444e-05	0.00015891	0.00843496	0.0119831	0.00885634	0.00113288	3.86501e-05	0.000895006	0	0	0.00599263	0.0022752	0.00133079	0	0	0.0119831	-0.000149087	downstream_gene_variant
MosD 25	Chr 5	20399869	SNV	T	C	EWC	100×WGS	0.118812	d-2		0.0104085	MosD 25	0.141142	0.0999021	0.0778769	0.09062	0.107184	0.102249	0.217122	0.137779	0.1303	0.120561	0.101164	0.181238	0.142875	0.145932	0.10611	0.114758	0.0241458	0.0410397	0.0198469	0.0227898	0.0177805	0.108568	0.108584	0.114086	0.124109	0.0251205	0.10259	1	0.0166667	0.051452	0.0275215	0.0144577	0	0	0.217122	0.0177805	intron_variant
MosD 28	Chr 6	34331719	SNV	C	T	EWC	100×WGS	0.113924	g-2		0.00146369	MosD 28	0.0624178	0.14715	0.0426153	0.0846506	0.0192722	0.0555313	0.0202754	0.011264	0.0380628	0.0345443	0.0506256	0.0439811	0.0631736	0.0600483	0.0561921	0.0199761	0.0129626	0.0174692	0.0717178	0.0691619	0.0469564	0.0749648	0.0544926	0.0826922	0.0521799	0.0436536	0.0503264	4	0.0666667	0.0255672	0.0128132	0.0069698	0	0	0.14715	0.011264	intergenic_region
MosD 29	Chr 6	74398281	SNV	T	G	EWC	100×WGS	0.12381	a-2		0.00147067	MosD 29	0.0589963	0.0802917	0.112711	0.157758	0.0465111	0.130318	0.125394	0.161358	0.0833404	0.144468	0.159678	0.149692	0.059786	0.0816344	0.10945	0.179886	0.314295	0.271288	0.181545	0.356843	0.314254	0.120773	0.148111	0.126648	0.117231	0.287645	0.154277	21	0.35	0.0732662	0.0370627	0.0202026	0	0	0.356843	0.0465111	intergenic_region
MosD 31	Chr 7	115118470	SNV	C	T	EWC	100×WGS	0.105691	g-2		0.00220335	MosD 31	0.0549398	0.149659	0.0439474	0.0766951	0.0180673	0.0508198	0.0202923	0.0118283	0.0386587	0.0350931	0.0471988	0.0407805	0.0562943	0.0599569	0.0528785	0.0201816	0.0128442	0.0172348	0.0660046	0.0658464	0.044824	0.0751322	0.0522503	0.0794225	0.0502597	0.0413508	0.0483229	4	0.0666667	0.02604	0.0132822	0.00686233	0	0	0.149659	0.0118283	intergenic_region
MosD 32	Chr 8	14901273	SNV	C	T	EWC	100×WGS	0.0687023	e-2		0.00138218	MosD 32	0.0800424	0.097642	0.0980569	0.0705063	0.0496974	0.0652761	0.0313448	0.0317485	0.102166	0.031124	0.0705564	0.0383415	0.0537531	0.0553382	0.0440352	0.0786678	0.120632	0.149016	0.193889	0.026436	0.119135	0.0688056	0.0644827	0.0547118	0.0628658	0.121822	0.0756823	6	0.1	0.0305335	0.0162068	0.00736368	0	0	0.193889	0.026436	3_prime_UTR_variant
MosD 34	Chr 9	56019324	SNV	G	A	EWC	100×WGS	0.0507246	a-4		0.000534195	MosD 34	0.0133595	0.0149825	0.0405339	0.023332	0.0197284	0.0226482	0.0552351	0.0627604	0.0122133	0.0727295	0.0641465	0.0400471	0.0181696	0.0170364	0.0472655	0.02064	0.0250605	0.0134597	0.012198	0.0461934	0.0192766	0.0246466	0.0447563	0.019962	0.0341239	0.0232376	0.0317573	0	0	0.0208606	0.0112825	0.00437452	0	0	0.0727295	0.012198	intergenic_region
MosD 35	Chr 10	96794416	SNV	C	T	EWC	100×WGS	0.12605	e-1		0.00213115	MosD 35	0.14024	0.249941	0.137886	0.15285	0.0687038	0.122841	0.0511053	0.0414757	0.14957	0.0661683	0.120713	0.077962	0.105075	0.113469	0.103716	0.097539	0.134634	0.169743	0.263632	0.0964571	0.16572	0.144396	0.118562	0.134403	0.114567	0.166037	0.125756	16	0.266667	0.0602785	0.0310993	0.0148756	0	0	0.263632	0.0414757	intergenic_region
MosD 37	Chr 11	36086105	SNV	C	T	EWC	100×WGS	0.0853659	j-1		0.0017814	MosD 37	0.154838	0.0716662	0.167083	0.0970678	0.276781	0.149433	0.0972941	0.153545	0.141102	0.155083	0.115146	0.0788973	0.172258	0.147503	0.17477	0.101435	0.0200583	0.0164609	0.0364392	0.0249123	0.0025977	0.121951	0.126106	0.112254	0.138998	0.0200937	0.113149	0	0	0.0646686	0.0332957	0.0165943	0	0	0.276781	0.0025977	downstream_gene_variant
MosD 39	Chr 12	34577688	SNV	G	A	EWC	100×WGS	0.0521739	ND		0.00109833	MosD 39	0.00104633	0.000620604	0.00145568	0.0404794	0.000508226	0.00154821	0.000506346	0.000646204	0.00238032	0.0034796	0.00254431	0.00746306	0.00283709	0.00234299	0.00394387	0.00445951	0.00024049	0.000801943	0.000356703	0.000339381	0.000385968	0.0405676	0.0216645	0.0472269	0.0076941	0.000424897	0.00611384	0	0	0.0110754	0.00574979	0.00269739	0	0	0.0472269	0.00024049	intron_variant
MosD 41	Chr 13	96273179	SNV	G	T	EWC	100×WGS	0.25	a-1		0.00034287	MosD 41	0.198704	0.185283	0.195163	0.255984	0.151266	0.234101	0.353972	0.301461	0.209744	0.267996	0.265479	0.338165	0.215671	0.231963	0.217876	0.298658	0.352725	0.320539	0.208247	0.387273	0.335581	0.233701	0.253809	0.24587	0.244944	0.320873	0.261451	19	0.316667	0.132625	0.0667387	0.0320241	0	0	0.387273	0.151266	intergenic_region
MosD 44	Chr 15	5485823	SNV	G	A	EWC	100×WGS	0.134831	a-2		0.00129044	MosD 44	0.0594063	0.0891277	0.115403	0.158704	0.0479324	0.132754	0.129507	0.169342	0.08156	0.150182	0.16289	0.15456	0.065517	0.0783639	0.110108	0.1858	0.321526	0.279352	0.182466	0.360789	0.318743	0.12413	0.142632	0.132386	0.119884	0.292575	0.157426	21	0.35	0.0745873	0.0377212	0.019913	0	0	0.360789	0.0479324	intergenic_region
MosD 48	Chr 15	52615284	SNV	C	G	EWC	100×WGS	0.0519481	j-2		0.000265209	MosD 48	0.0818624	0.0440174	0.0622762	0.0574401	0.21006	0.0895377	0.062663	0.113216	0.0795949	0.111897	0.0883105	0.0277473	0.107295	0.0658808	0.0877649	0.0225	0.0102406	0.00769396	0.0181049	0.0137746	0.00149301	0.0680283	0.0671177	0.0566289	0.0804005	0.0102614	0.0651529	0	0	0.0350051	0.0163332	0.00888925	0	0	0.21006	0.00149301	intergenic_region
MosD 50	Chr 15	98890966	SNV	C	A	EWC	100×WGS	0.162162	e-1		0.000262821	MosD 50	0.137378	0.240944	0.135859	0.149276	0.063859	0.116176	0.0516556	0.0412828	0.141428	0.0700833	0.119873	0.0780661	0.109985	0.120841	0.101674	0.0990243	0.135989	0.170947	0.254241	0.094371	0.163544	0.139046	0.120613	0.138957	0.11317	0.163818	0.124181	13	0.216667	0.0594374	0.0287209	0.0143763	0	0	0.254241	0.0412828	downstream_gene_variant
MosD 51	Chr 16	39992189	SNV	G	T	EWC	100×WGS	0.0454545	e-3		0.00100685	MosD 51	0.0815135	0.0980818	0.0892945	0.0660414	0.0311623	0.0347187	0.0179474	0.0262821	0.0993454	0.0231506	0.066149	0.0318178	0.0478876	0.0371009	0.0307728	0.0698372	0.00641791	0.0912381	0.0031012	0.0091734	0.0147162	0.0556979	0.0512404	0.0418816	0.0532245	0.0249294	0.0470734	0	0	0.0261018	0.0125787	0.00740507	0	0	0.0993454	0.0031012	intron_variant
MosD 52	Chr 16	41924133	SNV	C	T	EWC	100×WGS	0.109375	j-1		0.000760858	MosD 52	0.152719	0.0664851	0.163334	0.0946269	0.273845	0.138834	0.0943565	0.149618	0.145732	0.155385	0.108683	0.0790368	0.170608	0.149954	0.175489	0.0991299	0.02009	0.0151779	0.0357114	0.0232617	0.00251299	0.11928	0.128501	0.111521	0.136979	0.0193508	0.111407	0	0	0.062135	0.0310301	0.0157631	0	0	0.273845	0.00251299	intron_variant
MosD 54	Chr 17	40193064	SNV	T	A	EWC	100×WGS	0.0505051	a-2		0.000354827	MosD 54	0.0616848	0.0822858	0.113049	0.152257	0.046589	0.131053	0.124898	0.167475	0.081393	0.147781	0.16051	0.151656	0.0632181	0.0815916	0.10436	0.187737	0.314364	0.280847	0.186104	0.357111	0.316502	0.119401	0.145757	0.126997	0.117928	0.290986	0.155549	21	0.35	0.0754048	0.0368268	0.021618	0	0	0.357111	0.046589	intergenic_region
MosD 55	Chr 17	55935469	SNV	G	C	EWC	100×WGS	0.0380952	ND		0.000122936	MosD 55	0.000154083	0.0160307	0.00352897	0.00611143	0.00515025	0.00457347	0.000472831	0.00868319	0.00215711	0.00140867	0.00587872	0.0200004	0.00196637	0.000349387	0.00739124	0.00963834	0.000509756	0.00140106	0.000358946	0.00260496	6.71355e-05	0.0104493	0.00656868	0.00912882	0.00613962	0.000988372	0.00501978	0	0	0.00493166	0.00107998	0.000835765	0	0	0.0200004	6.71355e-05	downstream_gene_variant
MosD 56	Chr 17	64929799	SNV	G	A	EWC	100×WGS	0.112676	e-1	High VAF in negative control	0.0296892	MosD 56	0.112935	0.20711	0.108788	0.120262	0.0549254	0.0944483	0.046599	0.034264	0.113661	0.0537774	0.0913333	0.0671599	0.0898882	0.0947261	0.0856117	0.0848589	0.107281	0.134265	0.206609	0.0803346	0.132485	0.11656	0.0953415	0.109512	0.0929027	0.132195	0.101444	11	0.183333	0.0511032	0.0266828	0.0112973	0	0	0.20711	0.034264	intergenic_region
MosD 57	Chr 18	39315000	SNV	C	T	EWC	100×WGS	0.0875	g-2		0.000987899	MosD 57	0.0598246	0.146307	0.044015	0.0810154	0.0179922	0.0524448	0.0212276	0.0117887	0.0408038	0.0351483	0.049901	0.0417828	0.0606447	0.0625042	0.0585846	0.0188972	0.0129679	0.0197287	0.0694799	0.0647809	0.046424	0.0760907	0.0534852	0.0834883	0.0518032	0.0426763	0.0498191	7	0.116667	0.0261694	0.0150696	0.0060012	0	0	0.146307	0.0117887	intron_variant
MosD 58	Chr 18	66993284	SNV	G	T	EWC	100×WGS	0.0694444	j-1		0.000977291	MosD 58	0.159319	0.0679884	0.165112	0.100321	0.284596	0.148225	0.0966714	0.153844	0.141051	0.162758	0.117115	0.082038	0.177148	0.153226	0.180033	0.0981152	0.0220136	0.0154434	0.0340918	0.0214974	0.00242439	0.122576	0.125463	0.115052	0.140867	0.0190941	0.114394	0	0	0.0685523	0.0308841	0.0176525	0	0	0.284596	0.00242439	intergenic_region
MosD 60_div2	Chr X	11081028	SNV	C	T	EWC	100×WGS	0.0784314	ND		0.000215666	MosD 60div2	-5.02459e-05	6.34576e-05	3.92671e-05	-3.70067e-06	0.000110546	1.35896e-05	-2.25675e-05	0.000161835	-1.41754e-05	-2.56202e-05	3.2784e-05	8.70428e-05	5.83208e-05	9.86315e-05	0.000125348	2.47123e-05	9.81102e-05	0.000191171	-4.5362e-05	0.000124362	1.44578e-05	0.00917428	0.00807771	0.00800965	0.00099729	7.65477e-05	0.000797129	0	0	0.00452709	0.00253743	0.00100988	0	0	0.00917428	-5.02459e-05	intergenic_region
MosD 72	Chr 1	48415014	SNV	C	T	noEWC	100×WGS	0.102941	j-3		0.00155786	MosD 72	0.0668742	0.0217098	0.0444	0.0447267	0.13587	0.0549266	0.0509744	0.0588005	0.0689416	0.100055	0.0374346	0.0102141	0.106826	0.0281262	0.0706861	0.0167481	0.00499297	0.0073898	0.00635013	0.0115812	0.00166239	0.0480247	0.050247	0.0379045	0.0564215	0.0063953	0.0455462	0	0	0.0247809	0.0123088	0.00548487	0	0	0.13587	0.00166239	intergenic_region
MosD 79	Chr 8	108710104	SNV	G	T	noEWC	100×WGS	0.0526316	ND		0.00169495	MosD 79	4.45632e-05	5.54486e-05	0.000102719	0.000181746	0.00010774	0.000487084	-8.49124e-05	-0.000728241	5.51063e-05	-1.2115e-05	-5.06728e-05	0.000190146	1.96809e-06	0.000100751	3.50491e-05	2.79606e-05	4.38762e-05	-0.000770135	-1.27779e-05	-0.00070244	8.79194e-05	0.00425659	0.00749593	0.00187846	0.000681492	-0.000270712	0.000474491	0	0	0.00409869	0.00234539	0.00158996	0	0	0.00749593	-0.000770135	upstream_gene_variant
													1
Genotyping results of the offspring
													Spouse #1	F1 of #1	F1 of #1	F1 of #1	F1 of #1	F1 of #1	F1 of #1	F1 of #1	F1 of #1	F1 of #1	F1 of #1	F1 of #1	F1 of #1	F1 of #1	F1 of #1	F1 of #1	F1 of #1	F1 of #1	F1 of #1	F1 of #1	F1 of #1	F1 of #1	F1 of #1	F1 of #1	F1 of #1	F1 of #1	F1 of #1	F1 of #1	F1 of #1	F1 of #1	F1 of #1	F1 of #1	IVF	IVF	IVF	IVF	IVF
	Chr	Pos		REF	ALT		WGS data	VAF in WGS_100×	Cell position	Note	VAFS in negative control		ConD31-0828f1	ConD32-1211m1	ConD32-1211m2	ConD32-1211m3	ConD32-1211m4	ConD32-1211m5	ConD32-1211f1	ConD32-1211f2	ConD32-1211f3	ConD32-1211f4	ConD32-0210m1	ConD32-0210m2	ConD32-0210m3	ConD32-0210m4	ConD32-0210m5	ConD32-0210f1	ConD32-0210f2	ConD32-0210f3	ConD32-0409m1	ConD32-0409m2	ConD32-0409m3	ConD32-0409f1	ConD32-0409f2	ConD32-0613m1	ConD32-0613f1	ConD32-0613f2	ConD32-0613f3	ConD32-0613f4	ConD32-0903m1	ConD32-0903m2	ConD32-0903f1	ConD32-0903f2	ConD31_pup1	ConD31_pup2	ConD31_pup3	ConD31_pup4	ConD31_pup5
MosD 1	Chr 1	136327613	SNV	C	T	EWC	100×WGS	0.0458015	j-2		0.000664478	MosD 1	3.80765e-05	-8.95742e-05	0.000137226	0.000143266	1.63978e-05	1.90664e-05	-0.000275989	-9.73711e-05	-7.866e-05	0.000190131	-5.20915e-05	0.000326823	-7.60855e-05	-1.56463e-05	-0.000171954	0.000114271	-1.97741e-05	-2.68784e-05	6.13722e-06	5.39905e-05	3.02689e-05	-0.000321581	-3.81897e-05	8.84426e-05	8.23817e-07	0.000197228	0.000313319	0.000197284	-8.91058e-05	0.000205338	-6.56228e-05	-1.34451e-05	-0.000221054	-0.000290242	-9.06613e-05	-3.85733e-05	0.000137231
MosD 2	Chr 1	138873847	SNV	G	C	EWC	100×WGS	0.0918367	e-2		0.000418532	MosD 2	-5.60398e-05	0.000499887	0.000186303	0.000487565	-0.000101589	7.23469e-05	-1.54838e-05	0.000126539	0.508098	0.000467214	0.502297	-7.54138e-07	5.22073e-05	0.000563108	-1.98093e-05	-5.23728e-05	0.000276183	4.75363e-05	2.95438e-05	0.000290596	-0.000102983	1.74234e-05	-7.21682e-05	-4.1758e-05	0.000739105	-3.06906e-05	0.000203709	-6.73759e-05	0.000113791	0.495091	0.000228145	3.81581e-05	0.499274	2.41554e-05	2.54466e-05	0.000439265	7.36951e-05
MosD 5	Chr 2	56018049	SNV	G	A	EWC	100×WGS	0.11236	g-2		0.00168436	MosD 5	0.000354829	0.000394414	0.000261405	-0.000344087	0.000239527	0.00122565	0.000523345	3.38461e-05	-0.000208161	-0.000342484	-0.00029308	0.489294	0.500301	0.000406421	0.492198	0.000606166	-2.07773e-05	-0.000414483	-0.00018787	4.85563e-05	0.508157	0.00143703	0.49932	0.492509	7.34078e-05	0.00016466	-0.000281193	0.000294107	0.000350729	-0.000191031	0.00140874	0.493027	2.92466e-05	-0.000169487	-0.000353882	-7.50002e-05	0.000263618
MosD 8	Chr 2	111942370	SNV	C	T	EWC	100×WGS	0.119403	d-2		0.0023005	MosD 8	7.23486e-05	6.0566e-05	0.000160669	0.000441932	-0.00025852	-5.87319e-05	0.000482871	-7.89918e-05	9.13356e-05	-0.000112626	0.000180684	0.000261381	-5.08958e-05	0.000700606	-3.57347e-05	0.000138332	-2.24544e-05	-0.000144711	4.60972e-05	-0.000365155	-2.23043e-05	-0.000234023	5.53502e-06	9.62831e-05	0.000165473	-0.000386467	0.000349347	-0.00024174	0.000295987	-0.000360162	0.000589419	0.00020069	0.000236068	-0.000175082	-0.000319292	9.12644e-05	0.000356807
MosD 9	Chr 2	122725286	SNV	T	G	EWC	100×WGS	0.0740741	a-3	High VAF in negative control	0.034531	MosD 9	-0.000195719	-0.000279662	-0.001439	0.43753	-0.000373888	0.437204	-0.000708503	0.434637	0.000269807	-0.00113554	-0.00104255	-0.00321296	0.00253719	0.434339	0.000548534	0.441333	-0.00174659	0.000675969	0.000522326	-0.00205307	-0.000388962	-0.000870872	-0.0016084	-0.00022607	0.000700956	0.447038	-0.000861602	0.000560274	-0.00177924	-0.00115415	0.430496	-0.00175413	-0.00169668	0.423511	0.000332491	0.422835	0.429168
MosD 11	Chr 2	135155379	SNV	C	T	EWC	100×WGS	0.0454545	g-4*	Cell position determined by offspring	0.000659803	MosD 11	0.000556956	0.000285892	-0.000201478	-0.000153512	-0.00018314	7.52527e-05	-0.000391645	9.84518e-05	-0.000264934	-0.000373519	-1.23797e-05	-0.000175126	-0.000299027	-0.000211778	0.497336	-0.000165203	-0.000240784	-0.000247341	-0.000132948	-0.000225296	0.494409	0.000369295	-8.34656e-05	3.31616e-05	-0.000221166	-0.000265407	0.000131267	-0.000230363	-1.61128e-05	-0.000214798	0.000742487	0.000125144	-0.000102494	-4.82066e-05	-0.000100636	-0.000174039	0.000316332
MosD 13	Chr 3	66473715	SNV	G	T	EWC	100×WGS	0.040404	ND		0.00327392	MosD 13	-0.000246561	-0.000101263	-0.000252524	-0.000189905	-9.0422e-05	-0.000556183	0.000211312	-0.000139344	0.000254713	-0.000275015	9.32797e-05	0.000192041	-7.6392e-05	0.000229601	-0.00048857	-0.000403539	0.000128201	-2.06002e-05	0.000289405	8.98104e-05	-2.99936e-05	-7.62875e-06	-7.9299e-05	-0.000160848	-0.000149376	-3.84667e-05	3.43941e-05	0.000163696	-0.000259526	-9.53292e-05	0.000117807	6.91116e-05	-4.78859e-05	-3.99048e-06	0.000150517	-0.000216642	-0.000293547
MosD 14	Chr 3	99914989	SNV	A	T	EWC	100×WGS	0.0952381	j-1		0.00145982	MosD 14	-0.000534871	-0.00065806	-0.000722058	0.00018779	-0.00108748	-0.000530482	-0.000406465	-0.00133997	-0.000180531	-0.00126739	-0.00013868	-0.000955688	-0.00116492	-0.000516123	-0.00145671	-0.000225848	-5.82608e-05	-0.000543596	3.75058e-06	-6.62904e-05	-0.000500142	-0.00145393	-0.000804113	-0.000464814	-0.00124004	-0.00015203	-0.000563334	-0.000147707	-0.000553106	-0.000798215	1.94114e-05	-0.000365675	0.0004021	-0.000559572	-0.000437474	-0.000144261	0.000242575
MosD 16	Chr 3	138886740	SNV	A	T	EWC	100×WGS	0.05	ND		0.000573203	MosD 16	-3.09438e-05	-3.75308e-05	0.00016335	-2.6898e-05	4.58894e-05	0.000154828	0.000142214	0.000256215	-4.78509e-05	1.79224e-05	0.000156159	0.000226753	0.000215896	0.000276295	0.000300639	0.000190726	-2.4589e-05	0.000233824	3.63326e-05	0.000139551	3.42267e-05	-0.000178138	4.62924e-05	0.000156419	6.60523e-05	0.00011127	0.00010756	4.62726e-05	0.000156327	-5.10341e-05	0.000378086	9.02284e-05	8.78497e-05	0.000146055	-8.36383e-05	0.000230595	-6.0453e-05
MosD 19	Chr 4	76849980	SNV	C	T	EWC	100×WGS	0.154639	g-3*	Cell position determined by offspring	0.00326026	MosD 19	0.000585707	0.00081033	0.000575165	-0.000133714	0.000164356	0.00069528	0.000335049	0.000335827	0.000151427	0.000288768	0.000145984	0.000252279	0.000811076	0.00024594	0.493576	0.000440238	0.000136666	-0.000152311	0.000186515	0.000611435	-0.000546588	2.46103e-05	0.491628	0.000815173	-0.000400785	-0.000424258	0.000516886	0.000333857	0.000387677	9.15202e-05	0.000789062	-9.91208e-05	0.000811689	-3.22705e-06	-0.000260894	-0.000118436	-2.16362e-05
MosD 20	Chr 4	88430829	SNV	T	G	EWC	100×WGS	0.059322	j-3		0.0007357	MosD 20	2.50115e-05	-2.11285e-05	-4.19046e-05	0.000143006	-3.64078e-06	9.50407e-05	5.14247e-05	0.000215864	0.00023359	-5.65811e-06	-0.000122359	0.000158656	2.19199e-05	5.94854e-05	0.000154856	7.74494e-05	-0.000103718	-0.000147083	-0.000132803	3.82953e-05	2.97897e-05	-4.11696e-05	0.000146636	-1.16931e-05	-4.96006e-05	-3.19635e-05	-5.37813e-05	2.12823e-06	9.19118e-05	-4.54258e-05	9.38616e-05	7.36311e-06	0.00024231	4.48241e-05	-1.99725e-05	-2.97243e-05	9.14473e-05
MosD 21	Chr 4	117318438	SNV	A	G	EWC	100×WGS	0.0704225	e-2		0.00551767	MosD 21	2.7096e-05	-0.000140586	-0.000672708	0.000862967	0.00047508	-4.1512e-05	0.000760261	-0.000545733	0.000933235	0.000363806	0.490844	0.000664579	0.000572408	-0.000176076	0.000478306	-1.08074e-05	0.495118	0.000960976	5.5241e-05	0.00025749	0.000366471	-0.000524906	-0.00102024	0.000981032	0.00076633	-0.000414212	0.000601327	-0.000404318	-0.000165387	2.39371e-05	7.11573e-05	0.000663251	9.49059e-05	0.000117419	-0.000509859	0.00116782	-0.000653426
MosD 22	Chr 4	135452915	SNV	G	A	EWC	100×WGS	0.0487805	ND		0.000701282	MosD 22	0.000164612	-8.82268e-07	0.000372165	6.79814e-05	-1.79725e-05	-9.87049e-05	-6.53986e-05	-9.30791e-05	-0.000145355	2.90238e-06	9.94351e-05	0.000379526	2.05784e-05	-0.000275217	-0.000119059	0.000112095	-0.000201256	-0.000390449	-8.2105e-05	-9.67335e-05	-7.12237e-05	-0.000194584	-7.05266e-05	-3.20852e-05	3.35409e-05	-1.33033e-05	-5.69342e-05	-0.000136867	-1.06866e-05	8.74151e-05	-5.67849e-05	1.3084e-05	-2.8124e-05	-0.00011821	-2.26132e-05	0.000120413	-0.0003005
MosD 25	Chr 5	20399869	SNV	T	C	EWC	100×WGS	0.118812	d-2		0.0104085	MosD 25	0.000173911	-0.00116307	-0.000138721	0.000250212	0.000387133	0.000922042	0.000769715	0.000103262	0.000249176	0.000730349	0.000697797	0.000665735	0.000476194	0.00101965	0.0008407	0.000126221	0.000388455	0.000331729	0.00045097	0.000459755	0.000460394	-0.000491105	-0.000775242	-2.37921e-05	0.00090402	0.000421595	0.00102542	0.00111704	-0.0004623	0.000389374	0.000744274	0.000427332	-0.000253851	0.000192437	-2.46039e-05	0.000367712	0.000517833
MosD 28	Chr 6	34331719	SNV	C	T	EWC	100×WGS	0.113924	g-2		0.00146369	MosD 28	0.000279786	4.89637e-05	-0.000816914	-0.000207493	-0.000852699	0.000153547	-0.000409293	-0.000214515	-0.000433657	-0.000756127	0.000170949	0.0001325	0.488481	-1.1017e-05	-0.000210568	-0.000859995	-0.000308881	-2.27859e-05	-3.31004e-05	-0.000399612	-0.000386038	-0.000736532	-5.19506e-05	-0.000481846	-0.000949848	0.000118919	-0.000240924	0.498765	0.000121855	-0.000455676	0.000713633	-0.000313713	-0.000362469	-0.000379962	-5.1992e-06	-0.000114996	0.00036357
MosD 29	Chr 6	74398281	SNV	T	G	EWC	100×WGS	0.12381	a-2		0.00147067	MosD 29	0.000952354	0.000145314	0.487613	-0.000330902	0.499409	0.000845982	0.491181	0.493526	0.000193589	0.00124098	0.00232943	0.000887292	-7.22344e-05	0.00128431	0.00114754	0.494416	6.91961e-05	0.001038	0.00093661	0.495491	0.00144591	0.000901364	0.00139883	0.000421593	0.492582	0.000450447	0.496699	0.000530302	9.4876e-05	0.00103773	0.48767	0.00138808	-0.000264904	0.00245081	0.500084	0.00133868	0.494714
MosD 31	Chr 7	115118470	SNV	C	T	EWC	100×WGS	0.105691	g-2		0.00220335	MosD 31	0.00227505	0.00119719	0.000883418	5.16351e-05	-8.05265e-05	0.000110174	0.000221718	0.000596969	0.000101373	0.000605018	0.000394785	0.000297594	0.000121827	6.30896e-05	0.487647	0.000502333	0.000123361	-0.000148193	-8.5937e-05	0.00106716	0.000475042	0.00141116	6.59776e-05	-0.00031577	0.00014729	0.000395946	0.000511024	0.000385947	3.0246e-06	0.000259828	0.00160678	0.491438	0.00182065	1.45979e-05	0.000442358	0.000128604	0.000773054
MosD 32	Chr 8	14901273	SNV	C	T	EWC	100×WGS	0.0687023	e-2		0.00138218	MosD 32	0.000145471	-0.000318	-0.000316321	0.000563692	0.000106374	2.88208e-05	-4.10356e-05	-9.79982e-05	0.000208432	0.000110046	0.000581518	0.000921325	0.00049025	-0.000275857	3.62294e-05	-0.000156321	0.49799	-5.24541e-05	0.000405018	-8.08451e-05	-3.10893e-05	0.487095	3.98844e-05	1.3188e-05	-6.42249e-05	0.00061278	0.000920062	0.000350387	0.4941	0.000467161	-0.00027168	-0.000124083	0.502555	-0.000281702	4.20861e-05	0.00037594	0.000132738
MosD 34	Chr 9	56019324	SNV	G	A	EWC	100×WGS	0.0507246	a-4		0.000534195	MosD 34	0.000184131	-5.01816e-05	0.000299009	-0.000236606	6.94285e-05	-4.22298e-05	0.000157309	8.38916e-05	-0.000254714	0.000228387	7.11176e-05	-0.000314022	6.75059e-05	4.3969e-05	-4.04203e-05	-0.000120486	0.000236357	-0.000122691	-2.61333e-05	6.77883e-05	-8.97369e-05	8.31071e-05	0.00013239	-6.05715e-05	0.000172615	0.000227799	0.000124827	7.44088e-05	0.000361716	-6.34337e-05	0.000100289	0.000185894	-0.000112977	0.000155157	-5.23676e-05	0.000371431	0.000142223
MosD 35	Chr 10	96794416	SNV	C	T	EWC	100×WGS	0.12605	e-1		0.00213115	MosD 35	0.000747674	0.493734	-0.000255334	0.000966555	0.000619007	-3.79053e-05	-0.000256793	-0.000435998	0.000440499	1.48947e-05	0.000399473	0.490637	0.00109099	0.00065122	0.49983	-0.000343554	0.486655	0.499149	3.57156e-05	-0.000280751	0.503196	0.498456	0.485774	0.488426	-2.99486e-05	-0.000613735	0.000475561	0.488141	0.497985	-2.21564e-05	0.000949826	-0.000420564	0.493748	0.000549032	-0.00047575	0.000441875	0.000400574
MosD 37	Chr 11	36086105	SNV	C	T	EWC	100×WGS	0.0853659	j-1		0.0017814	MosD 37	0.000299824	3.29277e-05	0.000533279	0.000251243	0.000313262	0.000574234	1.55971e-06	3.8088e-05	2.21601e-05	-0.000424354	2.0064e-05	-0.000206241	3.7666e-05	0.000159635	0.000704892	-8.88246e-05	-6.47387e-05	0.000240354	9.2705e-05	0.00015942	0.000356564	-5.2354e-05	0.000171953	-9.91709e-05	-0.000209572	-0.000237068	3.47966e-05	7.86196e-05	0.000330447	0.000311958	0.000318569	7.48333e-05	0.000328355	6.3936e-05	0.000223291	0.000150208	0.000320886
MosD 39	Chr 12	34577688	SNV	G	A	EWC	100×WGS	0.0521739	ND		0.00109833	MosD 39	0.000267504	2.63034e-05	0.00033953	6.63553e-07	-7.38952e-05	1.95701e-05	0.000378407	0.00036402	0.000201337	0.000256133	-6.35433e-05	0.000577837	-6.33579e-05	8.20944e-05	0.000113142	0.000846067	0.000230962	0.000467205	0.000335742	0.00033529	0.000524345	0.000616959	0.000207895	0.000359308	0.000358974	0.000391676	0.000286421	0.000200139	0.000359751	0.00024595	0.000704206	0.000551148	0.00046369	0.000891932	0.000280128	0.000252593	0.000567086
MosD 41	Chr 13	96273179	SNV	G	T	EWC	100×WGS	0.25	a-1		0.00034287	MosD 41	0.000492663	0.000430577	0.000425587	0.000559221	-8.09426e-05	0.484967	0.000764706	0.508107	0.000740444	0.508922	0.00226972	0.000154525	0.00128413	0.00143903	0.00114827	0.000149986	0.000260194	0.000242629	0.0018248	0.497441	0.000901031	0.000492947	0.000653037	0.000731535	0.511181	0.000410642	0.00061134	0.000870109	0.000898056	0.00164751	0.493118	0.000255169	0.000678651	0.000341413	0.501584	0.499743	0.000613013
MosD 44	Chr 15	5485823	SNV	G	A	EWC	100×WGS	0.134831	a-2		0.00129044	MosD 44	0.000610985	-1.2772e-05	0.00144005	0.49175	0.489684	0.492599	0.501912	0.000241939	0.000958903	0.50507	0.00206706	0.000761092	0.000725353	0.498619	0.000326972	0.500533	0.000252559	0.000615639	0.492731	0.501132	0.000395201	-0.000219735	0.000316509	0.000625944	0.502299	0.00110715	0.506251	0.000393842	0.000573917	0.00164299	0.000209246	0.00110108	5.20978e-05	0.495077	0.500132	0.501095	-0.000231831
MosD 48	Chr 15	52615284	SNV	C	G	EWC	100×WGS	0.0519481	j-2		0.000265209	MosD 48	-1.98904e-05	3.02071e-05	2.09191e-05	3.90737e-05	1.60591e-05	1.66929e-05	-6.59294e-05	1.62499e-05	6.47572e-05	2.26638e-05	-9.35637e-06	2.41247e-05	-9.41538e-06	-8.52606e-05	-6.81273e-05	-6.13771e-05	6.63771e-05	-5.95245e-05	-5.10269e-05	-1.9874e-05	4.25799e-05	-2.04125e-05	-6.96906e-05	2.7924e-06	3.22782e-05	-6.37487e-05	-1.3446e-05	-1.0959e-05	-4.44884e-05	2.41702e-05	7.2037e-05	-2.66601e-06	4.50903e-05	4.93988e-05	1.34659e-05	-4.3806e-06	-7.50613e-06
MosD 50	Chr 15	98890966	SNV	C	A	EWC	100×WGS	0.162162	e-1		0.000262821	MosD 50	1.32714e-05	0.000918068	0.000343978	0.000972227	0.00101362	-0.000310774	-5.87582e-05	-0.000165818	0.492883	-0.000426676	0.490242	0.000587009	0.000904439	0.00105136	-0.000216503	5.50972e-05	0.497377	0.506106	-0.000182476	-0.000426676	-0.000312573	0.49223	0.000143287	0.493716	0.0014383	-0.000267895	0.000701645	0.499898	0.49927	0.48994	0.00182526	0.488039	0.00114627	-4.94596e-05	-0.000426676	-6.11119e-05	-9.12179e-05
MosD 51	Chr 16	39992189	SNV	G	T	EWC	100×WGS	0.0454545	e-3		0.00100685	MosD 51	3.8586e-06	1.76166e-05	-0.000385194	-6.63776e-06	-3.08109e-06	-0.000135124	-0.000128835	-0.000213909	8.58925e-06	-0.000514065	2.06134e-05	0.000159105	-0.000145609	2.52671e-05	-0.000218558	-0.000320269	-6.07856e-05	-0.000120353	-0.000298042	-0.000268645	-0.000230691	-5.89434e-05	-0.000160699	-7.34837e-05	-0.000263545	-0.000293374	-7.97111e-05	-0.000187548	-0.000167237	-0.000135215	0.000295113	-0.00032961	0.000251149	-0.000422258	-8.07017e-05	0.000112489	-4.68629e-05
MosD 52	Chr 16	41924133	SNV	C	T	EWC	100×WGS	0.109375	j-1		0.000760858	MosD 52	-1.77447e-05	0.000211732	7.31768e-06	6.18853e-05	-0.000120483	5.7806e-05	1.9189e-05	7.64286e-05	-0.000137445	-0.000105993	-0.000133063	0.000151506	0.000454099	6.0189e-05	6.68547e-05	0.000246293	-8.34283e-05	-0.000232712	-9.5361e-05	-4.49793e-05	1.90481e-05	0.000109195	-2.93901e-05	0.000152987	0.000467405	0.000117036	0.000126258	4.85705e-05	0.000143155	-3.30743e-07	0.000134848	0.000294419	7.22447e-05	-2.46417e-05	0.000159178	8.82768e-05	7.55398e-05
MosD 54	Chr 17	40193064	SNV	T	A	EWC	100×WGS	0.0505051	a-2		0.000354827	MosD 54	0.000327814	-9.89535e-05	0.493088	0.492204	0.492831	0.50406	0.00133928	0.490051	-4.05828e-05	0.501426	0.00130008	0.000118654	0.00012172	0.000570757	3.82736e-05	0.498645	0.00030493	0.00227064	0.000545539	0.495161	-6.45424e-05	0.000483719	0.000536101	0.000287084	5.34932e-05	0.000480892	0.000269579	0.000418955	-0.000156549	0.00152061	-0.000326089	0.000547792	0.000253014	0.493147	0.50129	0.491095	0.000140185
MosD 55	Chr 17	55935469	SNV	G	C	EWC	100×WGS	0.0380952	ND		0.000122936	MosD 55	-5.94765e-05	-5.56815e-05	0.000119808	-5.45536e-05	-8.37336e-05	-8.37336e-05	-5.08605e-05	6.78677e-05	-4.92318e-05	-3.33228e-05	-8.37336e-05	-5.0093e-05	-8.37336e-05	-5.29786e-05	3.61254e-07	6.07055e-05	1.0762e-05	-4.66306e-05	-1.48868e-05	-2.11358e-05	-2.20338e-05	-1.14218e-05	8.20874e-05	1.72255e-05	4.12299e-05	-4.42001e-05	-5.48352e-05	-1.36e-05	3.92828e-05	-5.26178e-05	7.80944e-05	-8.37336e-05	2.0607e-05	-1.58496e-05	-1.39791e-05	-5.33052e-05	-4.68441e-05
MosD 56	Chr 17	64929799	SNV	G	A	EWC	100×WGS	0.112676	e-1	High VAF in negative control	0.0296892	MosD 56	0.00138914	0.000533275	-0.00257704	-0.000924369	-0.0020445	-0.00387253	-0.00302802	-0.00164677	0.396308	-0.000485174	-0.00456837	-0.00472528	-0.00102684	-0.00156794	0.398615	-0.000732224	-0.00173457	0.000971052	-0.00175478	-0.00101575	-0.00268753	-0.00353214	-0.00556775	-0.00356652	-0.00307078	-0.00171066	-0.00193121	0.401146	0.394426	0.405154	0.000765179	0.386868	0.396275	-0.000520691	-0.00200219	-0.00269351	-9.09382e-05
MosD 57	Chr 18	39315000	SNV	C	T	EWC	100×WGS	0.0875	g-2		0.000987899	MosD 57	0.00132936	0.000849779	0.000200247	-2.78222e-06	0.000290929	-9.59276e-05	-0.000321206	0.00070247	-0.000221476	-6.77444e-05	9.66155e-05	0.493818	0.000102127	-0.000370345	0.51299	0.000369301	-0.000167003	-0.000112959	-0.000305885	-5.16964e-05	0.490928	0.00145377	0.495984	-0.000263447	-0.000339272	1.80363e-05	-0.000390999	0.000396143	-8.04831e-05	-0.000245545	0.001978	0.502077	6.43499e-05	-8.69418e-05	-0.000182646	-6.00933e-05	0.000202641
MosD 58	Chr 18	66993284	SNV	G	T	EWC	100×WGS	0.0694444	j-1		0.000977291	MosD 58	2.50874e-06	-5.55328e-05	-0.000194248	-2.74489e-05	-0.000315598	-1.8914e-05	0.000108044	0.000116017	-9.67701e-05	-7.67451e-05	1.30784e-05	-0.000225409	0.000110724	7.11364e-05	7.51094e-05	-5.35478e-05	0.000178004	-0.000146631	8.49207e-05	-5.67191e-05	9.62563e-05	0.000232352	-0.000154201	-1.08165e-06	-0.000233823	-1.34176e-05	3.04054e-05	-6.21662e-05	-4.78204e-05	-0.000198279	0.000859331	4.47232e-05	-0.000124795	-0.000104073	-4.32415e-05	0.000240385	5.93134e-05
MosD 60_div2	Chr X	11081028	SNV	C	T	EWC	100×WGS	0.0784314	ND		0.000215666	MosD 60div2	4.96532e-05	9.64476e-05	-2.05942e-06	-6.81172e-05	-3.97208e-05	0.000221139	-0.00012825	-2.0758e-05	-2.49818e-05	0.000150081	-0.000249363	-5.30232e-05	0.000467121	0.000228832	9.45029e-05	-0.000110613	9.56315e-05	-1.91854e-05	0.000132132	0.000192121	0.000135677	-6.20245e-05	2.67081e-05	1.25064e-05	1.64043e-05	-0.000181271	-8.79002e-05	9.85415e-05	-0.000288711	-0.000182596	-0.000224817	-0.000109734	6.69252e-06	0.000152684	4.26892e-05	2.2108e-05	0.000131652
MosD 72	Chr 1	48415014	SNV	C	T	noEWC	100×WGS	0.102941	j-3		0.00155786	MosD 72	0.000348382	0.000369858	0.000544596	0.000599826	0.000410085	0.000243964	0.000419732	0.000537313	0.00062157	0.000108969	0.00032109	5.23669e-05	0.000718419	0.000254289	0.000401805	0.000323937	0.000615142	0.000358134	0.000616315	0.000360519	0.000285194	0.000656502	0.000914715	0.00109235	0.000701254	-1.87326e-07	0.000358226	6.22426e-05	0.000424103	0.000161158	0.000112729	-0.000242476	-0.000211382	0.000758627	0.000380096	0.00026048	0.000380929
MosD 79	Chr 8	108710104	SNV	G	T	noEWC	100×WGS	0.0526316	ND		0.00169495	MosD 79	-0.000134393	0.000172266	0.000307396	-1.76418e-05	1.28442e-05	0.00011121	9.69832e-05	-0.000227533	-1.81943e-05	0.000137466	4.37769e-05	0.000132157	-0.000163925	2.94969e-05	8.31042e-05	-2.10515e-05	-0.000228473	7.71507e-06	-0.000148882	9.32462e-05	0.000160707	-0.000151909	0.000323654	-0.000354554	-0.000178736	0.00012002	0.000231021	0.000113953	-0.00027191	-6.54787e-05	0.000966606	-0.000122314	0.000156747	4.77881e-05	0.000283143	1.71471e-05	0.000416625
													1
[truncated: 26 more columns]

## Sheet: Mutations(ConE29)
Supplemental Data 1. List of mosaic mutations with their VAFs
Mosaic mutations and ther VAFs in mouse ConE29
	Chr	Pos		REF	ALT		WGS data	VAF in WGS_100×	Cell position	Note	VAFS in negative control		Cerebrum	Cerebellum	Skin(Shoulder)	Skin(Buttocks)	Stomach	Lung	Liver-1	Liver-2	Intestine	Pancreas	Glandular gland	Quadriceps	Tongue	Heart	Spleen	Kidney	Testis 1-1	Testis1-2	Testis 2-1	Testis2-2	Sperm	Tail-youth	Tail	Tail 8week	Somatic average	Germ ave	Total ave	No offspring	Freq offspring	Tail 1:1 (diluted)	Tail 1:3 (diluted)	Tail 1:7 (diluted)	Tail 0:1 (negative con)	Sperm (negative con)	Max VAF	Min VAF	Annotation by SnpEff
MosE 1	Chr 1	25345165	SNV	G	A	EWC	100×WGS	0.177	g-1		0.00190209	MosE 1	0.1496	0.206527	0.130312	0.183411	0.176464	0.118825	0.0946095	0.130584	0.126482	0.0341531	0.153611	0.191948	0.158725	0.144671	0.164449	0.154473	0.0571191	0.135366	0.13685	0.254359	0.159255	0.159019	0.171238	0.165889	0.147172	0.14859	0.14748	5	0.1	0.0790127	0.0422188	0.0194378	0	0	0.254359	0.0341531	downstream_gene_variant
MosE 2	Chr 1	45849251	SNV	G	T	EWC	100×WGS	0.046	ND		0.00189913	MosE 2	0.000987701	0.0019023	0.000777525	0.00140371	0.00214064	4.70215e-05	-0.000785239	0.000189892	0.00434003	0.000226828	0.000880047	0.00261809	0.00123239	0.000981955	0.00127914	0.000123621	0.000975254	0.000100973	-0.000724047	0.00022534	3.77271e-05	0.0132401	0.0110041	0.0170198	0.0023661	0.00012305	0.00187848	0	0	0.00476241	0.000811504	0.000980156	0	0	0.0170198	-0.000785239	intergenic_region
MosE 3	Chr 1	99352116	SNV	G	A	EWC	100×WGS	0.242	a-1		0.00195231	MosE 3	0.337797	0.263297	0.365758	0.272273	0.293742	0.363386	0.380571	0.368225	0.352651	0.463137	0.317709	0.314649	0.32386	0.331439	0.329514	0.327301	0.44795	0.364569	0.358736	0.248793	0.342469	0.339963	0.310215	0.315715	0.336416	0.352503	0.339913	20	0.4	0.164324	0.0706599	0.0333195	0	0	0.463137	0.248793	intergenic_region
MosE 4	Chr 1	148901472	SNV	T	G	EWC	100×WGS	0.032	ND		0.00480325	MosE 4	0.00360859	0.0129535	0.0370021	0.0173357	0.0126742	0.0150822	0.0232959	0.0311412	0.0257644	0.0043078	0.0200001	0.0132251	0.0140713	0.0263345	0.0176566	0.0184598	0.00988335	0.0108968	0.00486428	0.00280737	0.00142955	0.0304577	0.0184875	0.0313482	0.0189921	0.00597627	0.0161626	0	0	0.0112277	0.00728616	0.00263515	0	0	0.0370021	0.00142955	intergenic_region
MosE 7	Chr 2	165324579	SNV	T	C	EWC	100×WGS	0.06	ND		0.00388085	MosE 7	0.00144933	0.000153735	-0.00160891	0.00176705	0.000266379	-0.00187523	-0.000266041	0.000286551	-9.9753e-05	-0.000598284	-0.000860308	-0.000124658	0.00187372	0.000235874	-5.58781e-05	0.000361577	0.000380516	0.000330995	0.000615555	0.000233324	7.17631e-05	0.0279635	0.0309653	0.0246324	0.00332411	0.000326431	0.00267244	0	0	0.0136307	0.0089324	0.00268083	0	0	0.0309653	-0.00187523	upstream_gene_variant
MosE 8	Chr 2	178525015	SNV	C	T	EWC	100×WGS	0.176	g-1		0.00120012	MosE 8	0.155089	0.219378	0.12334	0.196428	0.191313	0.122597	0.103793	0.128157	0.149579	0.0360418	0.162025	0.189017	0.174184	0.165081	0.161729	0.169556	0.0488094	0.137575	0.140465	0.256249	0.161493	0.162513	0.164772	0.168553	0.154144	0.148918	0.153008	5	0.1	0.0857485	0.0418652	0.0209794	0	0	0.256249	0.0360418	intergenic_region
MosE 9	Chr 3	13523218	SNV	A	T	EWC	100×WGS	0.066	ND		0.000926355	MosE 9	0.0225457	0.0608736	0.0148514	0.00958226	0.00233016	0.0118357	0.00362402	0.00365898	0.0196099	0.00354708	0.0144989	0.0129385	0.0091997	0.00196884	0.0108503	0.0356752	0.0054198	0.00470395	0.00618575	0.00651766	0.000446314	0.0325877	0.0382126	0.024535	0.0171328	0.0046547	0.0144202	0	0	0.0218737	0.00936524	0.00332093	0	0	0.0608736	0.000446314	intron_variant
MosE 10	Chr 3	76456627	SNV	C	T	EWC	100×WGS	0.123	a-3		0.00161525	MosE 10	0.138157	0.141957	0.178773	0.0819146	0.154106	0.114999	0.182785	0.0673539	0.145444	0.199163	0.134814	0.152251	0.110032	0.163669	0.158346	0.130399	0.281805	0.0185862	0.166637	0.124936	0.101191	0.157322	0.122782	0.144406	0.140793	0.138631	0.140323	6	0.12	0.0603971	0.0314146	0.012167	0	0	0.281805	0.0185862	intron_variant
MosE 12	Chr 3	119354360	SNV	T	A	EWC	100×WGS	0.0561798	ND		0.000581034	MosE 12	-1.234e-05	-2.6024e-05	3.43063e-05	5.17079e-05	5.57167e-05	-1.60345e-05	-2.01495e-05	3.33642e-05	0.00010183	0.000124947	4.99001e-05	6.80523e-05	0.00312455	5.18075e-05	-4.06129e-05	-3.54908e-05	-6.70246e-05	-1.40745e-05	8.48107e-05	-3.69052e-05	4.87779e-05	0.0290725	0.0159299	0.0219325	0.0026971	3.11685e-06	0.00211145	0	0	0.00702074	0.00387791	0.00224689	-5.33504e-05	5.33504e-05	0.0290725	-6.70246e-05	intron_variant
MosE 15	Chr 5	55107459	SNV	G	A	EWC	100×WGS	0.061	i-2		0.000579278	MosE 15	0.0447987	0.0959207	0.0551411	0.0391446	0.055067	0.0492313	0.0509392	0.0637398	0.0404088	0.0128736	0.043694	0.087906	0.0286271	0.0316993	0.0627578	0.0816008	0.00863201	0.00725146	0.0129024	0.0138396	0.00676077	0.057519	0.0740066	0.0373597	0.0541709	0.00987724	0.0445418	0	0	0.0335497	0.0178181	0.00813199	0	0	0.0959207	0.00676077	intergenic_region
MosE 17	Chr 5	87260846	SNV	C	T	EWC	100×WGS	0.049	d-4		0.0012418	MosE 17	0.0294647	0.0150904	0.0133011	0.0321435	0.00253892	0.0252132	0.0356404	0.013696	0.0259008	0.0355036	0.0361624	0.0214904	0.0468865	0.051203	0.0169891	0.00769707	0.0664444	0.270045	0.161176	0.0838335	0.198592	0.027376	0.0233602	0.0301913	0.0255365	0.156018	0.0539021	17	0.34	0.0142435	0.00651971	0.00265387	0	0	0.270045	0.00253892	intergenic_region
MosE 20	Chr 6	125700572	SNV	C	T	EWC	100×WGS	0.303	a-1		0.00102263	MosE 20	0.337928	0.287231	0.363683	0.307192	0.310214	0.387322	0.386848	0.370917	0.374917	0.447816	0.339559	0.31826	0.338263	0.360226	0.31596	0.346353	0.448553	0.364722	0.369524	0.245967	0.337101	0.341025	0.33864	0.340103	0.348464	0.353173	0.349488	20	0.4	0.149207	0.0707585	0.0423027	0	0	0.448553	0.245967	intron_variant
MosE 22	Chr 6	135443495	SNV	C	T	EWC	100×WGS	0.051	ND		0.00200615	MosE 22	0.000726088	0.000131654	-9.95745e-05	-0.000345329	0.000864873	0.000109802	0.000103552	0.000127112	0.000390014	-9.31087e-05	-0.000831853	0.000861706	0.00125413	-0.000615573	-0.000404871	0.000333661	-0.000533398	0.000176452	0.000925893	0.000143257	-3.17602e-06	0.0276874	0.0260692	0.0197065	0.00312605	0.000141806	0.0024773	0	0	0.0132519	0.00722966	0.00265777	0	0	0.0276874	-0.000831853	intergenic_region
MosE 24	Chr 7	71611779	SNV	T	G	EWC	100×WGS	0.372	a-1		0.000467144	MosE 24	0.356588	0.288356	0.375351	0.302807	0.307981	0.376437	0.396782	0.377994	0.385353	0.464329	0.342816	0.31115	0.336882	0.353116	0.333755	0.339731	0.446534	0.365284	0.376479	0.250157	0.34062	0.349337	0.332681	0.343207	0.351747	0.355815	0.352631	27	0.54	0.164687	0.0808888	0.0363939	0	0	0.464329	0.250157	intergenic_region
MosE 25	Chr 9	58222237	SNV	C	T	EWC	100×WGS	0.135	g-1		0.0018453	MosE 25	0.150251	0.218337	0.137544	0.196537	0.191291	0.117815	0.10808	0.128291	0.125552	0.0393835	0.154656	0.186878	0.170324	0.149085	0.158937	0.165526	0.0532102	0.1387	0.133592	0.253918	0.160564	0.154133	0.173669	0.157965	0.151461	0.147997	0.150708	6	0.12	0.0820355	0.0396361	0.0203825	0	0	0.253918	0.0393835	downstream_gene_variant
MosE 26	Chr 10	28977291	SNV	G	T	EWC	100×WGS	0.109	a-4		0.00363993	MosE 26	0.0472407	0.0679067	0.149308	0.0364544	0.100393	0.0892246	0.0920484	0.0592566	0.0890174	0.127279	0.0780291	0.092708	0.0765673	0.104096	0.0944403	0.0521247	0.0146866	0.009663	0.0542778	0.0204087	0.0221879	0.094945	0.0686236	0.0825745	0.0844257	0.0242448	0.0713429	4	0.08	0.0322801	0.0178972	0.00682279	0	0	0.149308	0.009663	upstream_gene_variant
MosE 27	Chr 10	39087487	SNV	G	A	EWC	100×WGS	0.099	g-1		0.00229298	MosE 27	0.148514	0.219999	0.129364	0.196716	0.188732	0.128912	0.111646	0.130585	0.127669	0.0397252	0.162153	0.191021	0.163514	0.157035	0.16628	0.17349	0.0539706	0.137829	0.136573	0.25568	0.163888	0.160783	0.173641	0.164452	0.153877	0.149588	0.152944	5	0.1	0.0817894	0.0412752	0.0199512	0	0	0.25568	0.0397252	intron_variant
MosE 30	Chr 12	5264106	SNV	G	A	EWC	100×WGS	0.042	ND		0.00306488	MosE 30	0.00449988	0.0118032	0.00712836	0.00841483	0.00160043	0.00949346	0.0027099	0.000760681	0.0023699	0.00179321	0.00726985	0.00690119	0.00365684	0.000128393	0.00844217	0.019997	0.00498782	0.00283102	0.0012181	0.00349263	0.000413891	0.018575	0.0348478	0.0109253	0.00835512	0.00258869	0.00710155	0	0	0.0195316	0.008634	0.00479514	0	0	0.0348478	0.000128393	intron_variant
MosE 31	Chr 13	98726073	SNV	G	A	EWC	100×WGS	0.321	a-1		0.00206368	MosE 31	0.341807	0.279018	0.370055	0.308923	0.311542	0.37643	0.390698	0.369962	0.381898	0.455499	0.338566	0.31494	0.325499	0.34798	0.327286	0.339869	0.456062	0.365954	0.377372	0.24818	0.337046	0.350474	0.339127	0.34492	0.34831	0.356923	0.350182	20	0.4	0.154984	0.0800178	0.0328951	0	0	0.456062	0.24818	missense_variant
MosE 32	Chr 13	114638313	SNV	T	G	EWC	100×WGS	0.179	d-2		0.00673575	MosE 32	0.171389	0.0971064	0.133936	0.195145	0.13495	0.152925	0.126473	0.157781	0.135328	0.173815	0.185617	0.132012	0.175692	0.146881	0.153811	0.13075	0.108771	0.325174	0.208654	0.103709	0.22587	0.135667	0.154954	0.140499	0.14968	0.194436	0.159409	11	0.22	0.0669345	0.0353967	0.0217792	0	0	0.325174	0.0971064	intron_variant
MosE 33	Chr 14	46535464	SNV	T	A	EWC	100×WGS	0.112	g-1		0.00321095	MosE 33	0.15536	0.218889	0.124637	0.20036	0.199437	0.123844	0.108625	0.127842	0.122942	0.038252	0.165199	0.194354	0.171239	0.151159	0.149799	0.172935	0.0584793	0.135399	0.142967	0.250939	0.158474	0.161421	0.179597	0.158685	0.153661	0.149252	0.152702	7	0.14	0.0879083	0.0446006	0.0151708	0	0	0.250939	0.038252	intergenic_region
MosE 36	Chr 17	67375394	SNV	C	T	EWC	100×WGS	0.143	a-2		0.00178063	MosE 36	0.175658	0.191183	0.229896	0.0990216	0.177182	0.219491	0.255823	0.212995	0.243833	0.279997	0.152336	0.163691	0.149932	0.213792	0.185158	0.191584	0.336644	0.0259435	0.178758	0.144725	0.117689	0.207934	0.166356	0.207877	0.195326	0.160752	0.18781	8	0.16	0.0854331	0.0385363	0.0185588	0	0	0.336644	0.0259435	intergenic_region
MosE 37	Chr 19	41435769	SNV	G	A	EWC	100×WGS	0.173	g-1		0.00426516	MosE 37	0.126855	0.192195	0.11147	0.176341	0.166182	0.117085	0.0963813	0.130909	0.116959	0.0387532	0.139591	0.172028	0.162125	0.135581	0.153987	0.141429	0.0438286	0.138848	0.121716	0.252841	0.159461	0.158456	0.155375	0.16396	0.138428	0.143339	0.139496	6	0.12	0.0742358	0.0351608	0.0151311	0	0	0.252841	0.0387532	intergenic_region
MosE 38_div2	Chr X	17263418	SNV	G	A	EWC	100×WGS	0.089	d-3		0.00102282	MosE 38_div2	0.0811116	0.0402321	0.0484244	0.0578821	0.0201188	0.093492	0.074876	0.0654605	0.0383491	0.120264	0.0951809	0.0524919	0.0596681	0.0767222	0.0390593	0.0716775	0.0890097	0.294722	0.165816	0.0854168	0.219623	0.0711879	0.0681646	0.0662292	0.0652424	0.170918	0.0882152	13	0.26	0.0349677	0.0172539	0.00912947	0	0	0.294722	0.0201188	intron_variant
MosE 41	Chr 3	45410593	INDEL	A	AT	EWC	100×WGS	0.035	ND		0.000206484	MosE 41	-0.000206484	-0.000206484	-0.000206484	-0.000206484	-0.000206484	-0.000206484	-0.000206484	4.76358e-06	-0.000206484	-0.000206484	-0.000206484	-0.000206484	-0.000206484	-0.000206484	-0.000206484	-0.000206484	-0.000206484	-4.45981e-06	-0.000206484	3.52888e-06	-4.45981e-06	0.0157326	0.0108473	0.013593	0.00130486	-8.36716e-05	0.001003	0	0	0.00512211	0.00159939	0.00147348	0	0	0.0157326	-0.000206484	intron_variant
MosE 46	Chr 2	150673355	SNV	C	A	noEWC	100×WGS	0.054	g-3*	Cell position determined by offspring	0.00188964	MosE 46	0.00161345	0.0190692	0.00174562	0.0107757	0.00369695	0.0144128	0.00194807	0.00093403	0.00559699	-0.000742066	0.00552561	0.00731846	0.00472411	0.00344802	0.00752704	0.00369695	0.0175375	0.001079	0.0794803	0.00093135	0.133403	0.000671368	0.0164488	0.0293513	0.00602284	0.0464862	0.0148192	5	0.1	0.00970859	0.00300293	0.00163475	0	0	0.133403	-0.000742066	upstream_gene_variant
MosE 65	Chr 6	133347305	SNV	G	T	noEWC	100×WGS	0.0614035	g-2		0.000196899	MosE 65	0.0714093	0.0904719	0.0533358	0.143861	0.109262	0.0666328	0.0318931	0.0410796	0.0389515	0.0236591	0.107762	0.0778104	0.110365	0.0844648	0.0934299	0.0606459	0.0397147	0.133728	0.102002	0.240254	0.133827	0.0963209	0.0864215	0.101243	0.0770987	0.129905	0.0885783	7	0.14	0.0385539	0.0208405	0.0123844	-1.15768e-05	1.15768e-05	0.240254	0.0236591	intergenic_region
													1
Genotyping results of the offspring
													Spouse #1	Spouse #2	Spouse #3	F1 of #2	F1 of #2	F1 of #2	F1 of #2	F1 of #2	F1 of #2	F1 of #2	F1 of #2	F1 of #3	F1 of #3	F1 of #3	F1 of #3	F1 of #3	F1 of #3	F1 of #1	F1 of #1	F1 of #1	F1 of #1	F1 of #1	F1 of #1	F1 of #1	F1 of #1	F1 of #3	F1 of #3	F1 of #3	F1 of #3	F1 of #3	F1 of #2	F1 of #2	F1 of #2	F1 of #2	F1 of #2	F1 of #2	IVF
													ConE29-0821f1	ConE29-0821f2	ConE29-0821f3	ConE30-1108m1	ConE30-1108m2	ConE30-1108m3	ConE30-1108m4	ConE30-1108m5	ConE30-1108f1	ConE30-1108f2	ConE30-1108f3	ConE30-1116m1	ConE30-1116m2	ConE30-1116f1	ConE30-1116f2	ConE30-1116f3	ConE30-1116f4	ConE30-1219m1	ConE30-1219m2	ConE30-1219f1	ConE30-1219f2	ConE30-1219f3	ConE30-1219f4	ConE30-1219f5	ConE30-1219f6	ConE30-0113m1	ConE30-0113m2	ConE30-0113f1	ConE30-0113f2	ConE30-0113f3	ConE30-0411m1	ConE30-0411m2	ConE30-0411f1	ConE30-0411f2	ConE30-0411f3	ConE30-0909m1	ConE29-pup1
	Chr	Pos		REF	ALT		WGS data	VAF in WGS_100×	Cell position	Note	VAFS in negative control					m	m	m	m	m	f	f	f	m	m	f	f	f	f	m	m	f	f	f	f	f	f	m	m	f	f	f	m	m	f	f	f	m	m
MosE 1	Chr 1	25345165	SNV	G	A	EWC	100×WGS	0.177	g-1		0.00190209	MosE 1	0.0017202	0.00192057	0.0013077	0.00111974	0.00132668	0.00149501	0.00132813	0.00175857	0.00152913	0.00105494	0.00174255	0.00146869	0.0016692	0.00190908	0.00165488	0.00162817	0.00159402	0.00176641	0.00109189	0.0015212	0.00166292	0.00139607	0.00098052	0.505152	0.00188221	0.00153185	0.00161708	0.00159314	0.00190172	0.492724	0.498298	0.00203613	0.00116892	0.00132562	0.00168529	0.00149113	0.000735294
MosE 2	Chr 1	45849251	SNV	G	T	EWC	100×WGS	0.046	ND		0.00189913	MosE 2	0.000273835	0.000407285	0.00032631	0.000358218	0.000468252	0.000248303	0.000384645	0.000475534	0.000482276	0.000213573	0.000370425	0.000376128	0.000395012	0.000492161	0.000736377	0.000466331	0.000742076	0.00054338	7.42225e-05	0.000709622	0.000261757	0.00027697	0.000119646	0.000267938	0.000357961	0.000280034	0.000637925	0.000519061	0.000472529	0.000681763	0.000294308	0.000495077	0.000219443	0.000538535	0.0004057	0.000219861	0
MosE 3	Chr 1	99352116	SNV	G	A	EWC	100×WGS	0.242	a-1		0.00195231	MosE 3	0.00125268	0.00129851	0.00118321	0.491931	0.00099678	0.502047	0.000881501	0.00132733	0.00218213	0.500853	0.00249119	0.000752243	0.501187	0.00138789	0.504243	0.00147716	0.00119491	0.506751	0.492223	0.481791	0.496388	0.00135417	0.00180467	0.000628394	0.509965	0.500076	0.491173	0.520323	0.00149084	0.000970751	0.00212112	0.00145957	0.495022	0.498727	0.00184087	0.00120735	0.472916
MosE 4	Chr 1	148901472	SNV	T	G	EWC	100×WGS	0.032	ND		0.00480325	MosE 4	0.00139418	0.00147414	0.000920641	0.00244535	0.00166608	0.00221501	0.000902083	0.00113459	0.00146132	0.00118959	0.00190852	0.00166782	0.00286438	0.00138302	0.0013303	0.00150485	0.00192208	0.00212811	0.00172368	0.00178891	0.00205286	0.000969149	0.00235784	0.00148414	0.00134664	0.00221495	0.00180191	0.00207518	0.00123957	0.000913474	0.00128252	0.00162131	0.00196181	0.00220084	0.00223547	0.00103093	0.00180723
MosE 7	Chr 2	165324579	SNV	T	C	EWC	100×WGS	0.06	ND		0.00388085	MosE 7	0.00351821	0.00308875	0.00300396	0.00252735	0.00309318	0.00347608	0.00415445	0.00383437	0.00351756	0.00412012	0.00319655	0.00341408	0.00323267	0.00291373	0.00363124	0.00287372	0.00346783	0.00400483	0.00348511	0.00344405	0.00358972	0.0039367	0.00324359	0.00408736	0.00312305	0.00361673	0.00321984	0.00265227	0.00342518	0.00309106	0.00326452	0.00356119	0.00371837	0.00352809	0.00358381	0.0033479	0.00333731
MosE 8	Chr 2	178525015	SNV	C	T	EWC	100×WGS	0.176	g-1		0.00120012	MosE 8	0.00111207	0.000814084	0.00101718	0.00139775	0.000952251	0.000908206	0.000928829	0.00109784	0.489511	0.00115255	0.000781326	0.49571	0.000949119	0.000849762	0.00171129	0.00135257	0.00106564	0.000856388	0.000988656	0.000746226	0.000928633	0.000983284	0.000821693	0.00125427	0.00134142	0.00096225	0.00166929	0.00119674	0.00126814	0.000725163	0.496759	0.00125552	0.000755382	0.000729029	0.00110659	0.000976394	0.000851547
MosE 9	Chr 3	13523218	SNV	A	T	EWC	100×WGS	0.066	ND		0.000926355	MosE 9	0.000288642	0.000688778	0.000596125	0.000390887	0.000439014	0.000613798	0.000550863	0.000435746	0.000378759	0.000745403	0.000438188	0.000458033	0.000303701	0.000537634	0.000540457	0.000160836	0.000416512	0.000399856	0.000467605	0.000536737	0.000181521	0.000248447	0.000401849	0.000566947	0.000629683	0.000154595	0.00022779	0.000254777	0.000477232	0.000609756	0.000194505	0.000680185	0.000320523	0.000211104	0.000211104	0.000371632	0.000306185
MosE 10	Chr 3	76456627	SNV	C	T	EWC	100×WGS	0.123	a-3		0.00161525	MosE 10	0.000785183	0.000774154	0.000532931	0.00131377	0.000702864	0.000827565	0.00105992	0.000817476	0.00144934	0.000977326	0.000974406	0.000924841	0.0006975	0.000792079	0.000579039	0.480847	0.000975848	0.492416	0.000977654	0.00162536	0.000674737	0.000538503	0.00100178	0.000863972	0.49491	0.000585676	0.000781106	0.488727	0.000991383	0.000741702	0.000931609	0.0013934	0.00114956	0.000587795	0.000831831	0.00077799	0.00105876
MosE 12	Chr 3	119354360	SNV	T	A	EWC	100×WGS	0.0561798	ND		0.000581034	MosE 12	0.000326569	0.000339306	0.000337436	0.000167113	0.000356692	0.000307608	0.000408271	0.000379911	0.000375384	0.00042907	0.000339102	0.000250258	0.000287852	0.000274802	0.000372203	0.000436274	0.000348362	0.000326437	0.000302282	0.000228964	0.000327805	0.000390974	0.000424272	0.0004313	0.000412751	0.000310315	0.000468725	0.000332347	0.000354208	0.000323807	0.000352681	0.000230028	0.000326881	0.000320502	0.000352801	0.000361361	0.000263163
MosE 15	Chr 5	55107459	SNV	G	A	EWC	100×WGS	0.061	i-2		0.000579278	MosE 15	0.000769231	0.000767593	0.000607903	0.00058356	0.000531897	0.000607441	0.000638511	0.000722022	0.000897923	0.000751329	0.000539843	0.000513111	0.000638478	0.000544647	0.000480221	0.000582857	0.00103123	0.000654265	0.000690628	0.0005741	0.000607145	0.000961459	0.000732565	0.00072882	0.000609433	0.000412329	0.000751943	0.000577515	0.000546766	0.00065247	0.000594125	0.000869916	0.000546775	0.000595465	0.000401533	0.000811643	0.000822538
MosE 17	Chr 5	87260846	SNV	C	T	EWC	100×WGS	0.049	d-4		0.0012418	MosE 17	0.00150325	0.00163839	0.00212571	0.0021465	0.499547	0.49419	0.00190442	0.494303	0.00231721	0.00224359	0.00141153	0.000611592	0.482068	0.00217732	0.00210143	0.00143427	0.0019698	0.00236833	0.489959	0.499842	0.00156447	0.478387	0.49829	0.00135704	0.0012941	0.00185271	0.47677	0.00131022	0.492821	0.0013192	0.000962155	0.499432	0.492304	0.49225	0.496292	0.00114495	0.486404
MosE 20	Chr 6	125700572	SNV	C	T	EWC	100×WGS	0.303	a-1		0.00102263	MosE 20	0.00116616	0.000564874	0.000911993	0.494377	0.0010646	0.00151809	0.000974709	0.000662581	0.000933917	0.000863089	0.49238	0.00139392	0.00149752	0.00103661	0.000368905	0.500971	0.504464	0.00146985	0.49216	0.0011499	0.49632	0.488587	0.00068499	0.000494054	0.496762	0.000849772	0.502574	0.000434358	0.498551	0.000508421	0.000727914	0.49139	0.51325	0.00146303	0.000776581	0.00133289	0
MosE 22	Chr 6	135443495	SNV	C	T	EWC	100×WGS	0.051	ND		0.00200615	MosE 22	0.00157199	0.00164649	0.000795703	0.00174412	0.00132996	0.00154828	0.00116016	0.00178772	0.00136764	0.00155502	0.000893608	0.0012503	0.00140414	0.00130317	0.00165563	0.001026	0.00167317	0.0010506	0.00121004	0.000919963	0.00110136	0.00199632	0.00125144	0.00163467	0.000958665	0.00133558	0.000974431	0.00132335	0.00116869	0.00143029	0.000952165	0.00197078	0.00112279	0.00105332	0.00150615	0.00141844	0.00116584
MosE 24	Chr 7	71611779	SNV	T	G	EWC	100×WGS	0.372	a-1		0.000467144	MosE 24	0.00120486	0.00071675	0.000280456	0.529361	0.494555	0.508712	0.512839	0.502023	0.000615073	0.512473	0.00084317	0.000777605	0.508255	0.501124	0.500721	0.507265	0.000646857	0.485499	0.00088476	0.489773	0.501599	0.504773	0.000741221	0.000932124	0.490586	0.510176	0.507658	0.510012	0.500137	0.000491763	0.000940533	0.000771073	0.000490517	0.000481822	0.499719	0.497705	0.492654
MosE 25	Chr 9	58222237	SNV	C	T	EWC	100×WGS	0.135	g-1		0.0018453	MosE 25	0.00154026	0.00152321	0.0013302	0.00149404	0.00152338	0.00129565	0.00172015	0.00169529	0.00129693	0.0012065	0.00161918	0.50217	0.00126323	0.00242104	0.00186255	0.00148121	0.00195555	0.00123386	0.00121859	0.00163103	0.0015512	0.00115297	0.00123842	0.5034	0.00162888	0.00128045	0.0016641	0.00153078	0.00125066	0.491085	0.00153894	0.00143967	0.00133306	0.00126699	0.00135829	0.0016203	0.00054605
MosE 26	Chr 10	28977291	SNV	G	T	EWC	100×WGS	0.109	a-4		0.00363993	MosE 26	0.000680022	0.000826651	0.000577876	0.000461404	0.000488311	0.000549835	0.504324	0.000574574	0.00050215	0.494835	0.000769675	0.000802947	0.000603318	0.000579738	0.000761193	0.00062004	0.000596491	0.000554881	0.000379111	0.000494413	0.000430194	0.000674049	0.00160826	0.000827293	0.000833898	0.000754053	0.000579486	0.000681882	0.000789759	0.000386473	0.000282691	0.000787992	0.000587659	0.000512699	0.000547765	0.000518697	0.000795967
MosE 27	Chr 10	39087487	SNV	G	A	EWC	100×WGS	0.099	g-1		0.00229298	MosE 27	0.00175833	0.00129332	0.00141768	0.0012217	0.00135379	0.0015678	0.00140032	0.00155786	0.00121402	0.00126439	0.00161886	0.495211	0.00114009	0.00246981	0.00128716	0.00147373	0.00128816	0.00144896	0.00162736	0.00154666	0.00139533	0.00156586	0.00153398	0.00148403	0.001242	0.00137904	0.00156598	0.0018926	0.00154977	0.505672	0.00147037	0.00142015	0.00120928	0.00151662	0.00123849	0.00121053	0.00150716
MosE 30	Chr 12	5264106	SNV	G	A	EWC	100×WGS	0.042	ND		0.00306488	MosE 30	0.00209955	0.00219278	0.00159693	0.00150541	0.00183079	0.00185594	0.00162042	0.00161122	0.00200868	0.00202297	0.0014917	0.00143921	0.00151224	0.00216002	0.00167508	0.00171796	0.00205603	0.00149932	0.00207958	0.00146436	0.00156115	0.00159357	0.00140449	0.00145145	0.00221416	0.00171018	0.00122676	0.00151158	0.00184628	0.00170834	0.0015571	0.00141178	0.00216765	0.00191766	0.00196582	0.0019467	0.0036292
MosE 31	Chr 13	98726073	SNV	G	A	EWC	100×WGS	0.321	a-1		0.00206368	MosE 31	0.00131251	0.00139068	0.00141704	0.492064	0.490941	0.501752	0.495284	0.490037	0.00128921	0.00140275	0.00118592	0.00131227	0.492182	0.0012314	0.488619	0.505826	0.00115226	0.00133391	0.00155233	0.493245	0.00168241	0.00178532	0.493513	0.00196833	0.00125651	0.506842	0.00144858	0.00151634	0.00168067	0.00114707	0.00130695	0.00179618	0.00124454	0.499775	0.499725	0.00218982	0.000755668
MosE 32	Chr 13	114638313	SNV	T	G	EWC	100×WGS	0.179	d-2		0.00673575	MosE 32	0.000720222	0.000766604	0.00088623	0.00102293	0.50364	0.486751	0.000854376	0.496101	0.000823094	0.00069939	0.000262881	0.000617951	0.000550509	0.000439367	0.486626	0.000580821	0.000483192	0.000434924	0.00055417	0.487488	0.00154552	0.000669344	0.492588	0.00102688	0.000584795	0.501525	0.000855171	0.000830852	0.000327475	0.00058292	0.000858922	0.00114989	0.000702779	0.490015	0.501748	0.000916842	0
MosE 33	Chr 14	46535464	SNV	T	A	EWC	100×WGS	0.112	g-1		0.00321095	MosE 33	0.000345616	0.000366107	0.000405727	0.00027356	0.000289335	0.000248114	0.000313152	0.000643049	0.4952	0.00025043	0.000158523	4.2328e-05	0.000177186	0.00115685	0.000241404	0.000453397	0.000198965	9.73362e-05	0.000351695	4.50227e-05	0.000396626	0.000143947	0.000337724	0.490467	0.000469836	0.000308052	7.23144e-05	0.000210512	8.70777e-05	0.503046	0.000184665	3.44768e-05	0.000320382	0.000237925	0.000107177	0.000186663	0.000824176
MosE 36	Chr 17	67375394	SNV	C	T	EWC	100×WGS	0.143	a-2		0.00178063	MosE 36	0.00123323	0.00164123	0.00155871	0.00175417	0.00159085	0.00206573	0.503719	0.00151874	0.00187334	0.507666	0.00192951	0.00152	0.00164344	0.00136764	0.00156175	0.488441	0.00173907	0.00136426	0.00134947	0.00154437	0.00241474	0.00130308	0.00197284	0.00144774	0.496467	0.0020193	0.00116659	0.00137041	0.00152398	0.00160383	0.00180193	0.0017526	0.0014516	0.00157123	0.00141575	0.497755	0.00186319
MosE 37	Chr 19	41435769	SNV	G	A	EWC	100×WGS	0.173	g-1		0.00426516	MosE 37	0.00203905	0.00171549	0.00123285	0.00156029	0.0011759	0.00140596	0.00138302	0.00173882	0.495461	0.00198177	0.00183396	0.491314	0.00145807	0.00195578	0.0019598	0.00145136	0.00147884	0.00133061	0.00150955	0.00124763	0.00119084	0.00149487	0.0012854	0.509627	0.00119466	0.00131135	0.00111955	0.00144278	0.00096648	0.489744	0.508397	0.00150874	0.00152748	0.000934761	0.0012171	0.00116158	0.00134499
MosE 38_div2	Chr X	17263418	SNV	G	A	EWC	100×WGS	0.089	d-3		0.00102282	MosE 38_div2	0.00246672	0.00275465	0.00192836	0.00329146	0.00290364	0.00373045	0.00319663	0.00226435	0.00164574	0.00261307	0.488323	0.00351822	0.00357158	0.499787	0.498639	0.00262717	0.486617	0.00304925	0.0032615	0.502242	0.502706	0.499328	0.504514	0.00180726	0.00251712	0.00162086	0.00312246	0.00241598	0.490885	0.00214432	0.0031482	0.0027018	0.496734	0.495161	0.511516	0.00259067	0.00307167
MosE 41	Chr 3	45410593	INDEL	A	AT	EWC	100×WGS	0.035	ND		0.000206484	MosE 41	0	0	0	0	0	9.23702e-05	0	0	0	0	0	0	0	0	0	0	0	0	0	0	0	0	0	0	0	0	0	0	0	0	0	0	0	0	0	0	0
MosE 46	Chr 2	150673355	SNV	C	A	noEWC	100×WGS	0.054	g-3*	Cell position determined by offspring	0.00188964	MosE 46	0.000359768	0.000946148	0.000512453	0.000534855	0.000105831	0.000102987	0.000493291	0.000227028	0.497612	0.000195033	9.07029e-05	0.000478316	0.000371632	0.000686695	0.00078405	0.000184139	0.000138313	0.000224732	0.00021245	0.000433539	0.000459805	0.00035775	0.000142308	0.000263557	0.000683002	0.000229384	0.000528103	0.000221125	0.000344037	0.513788	0.49261	0	0.000279122	0.0003831	0.000752497	0.000403226	0.000732869
MosE 65	Chr 6	133347305	SNV	G	T	noEWC	100×WGS	0.0614035	g-2		0.000196899	MosE 65	0.00040308	0.000376073	0.000647765	0.00052679	0.000461229	0.000411115	0.000364012	0.00039069	0.508248	0.000376294	0.000437456	0.503359	0.000471933	0.000440294	0.000490751	0.000521841	0.000510134	0.000560317	0.000411904	0.000408981	0.0005549	0.000431131	0.000299744	0.50389	0.000406396	0.000586449	0.000308278	0.000479262	0.000421294	0.503903	0.000298492	0.000378269	0.000472102	0.000466858	0.000371242	0.000471228	0.000338134
													1
[truncated: 18 more columns]

## Sheet: Mutations(ConJ12)
Supplemental Data 1. List of mosaic mutations with their VAFs
Mosaic mutations and ther VAFs in mouse ConJ12
	Chr	Pos		REF	ALT		WGS data	VAF in WGS_100×	VAF in WGS_900×merge	Cell position	Note	VAFS in negative control		Cerebrum	Cerebellum	Skin(Shoulder)	Skin(Buttocks)	Stomach	Lung	Liver-1	Liver-2	Intestine	Pancreas	Glandular gland	Quadricep	Tongue	Heart	Spleen	Kidney	Testis1-1	Testis1-2	Testis2-1	Testis2-2	Sperm	Tail-youth	Tail	Somatic average	Germ ave	Total ave	No offspring	Freq offspring	No in ntES	Tail 1:1 (diluted)	Tail 1:3 (diluted)	Tail 1:7 (diluted)	Tail 0:1 (negative con)	Sperm (negative con)	Max VAF	Min VAF
MosJ 1	Chr 2	30001023	SNV	T	C	EWC	100×WGS	0.0816327	0.0287921	t-2		0.00350371	MosJ 1	0.0271946	0.039708	0.0480361	0.0140303	0.0211758	0.0247785	0.0311878	0.0208498	0.0219629	0.0125212	0.0837428	0.0745644	0.0345936	0.0419665	0.0423215	0.0228346	0.0029716	0.011088	0.00343662	0.00771583	0.000421863	0.0507642	0.0511679	0.0368556	0.00512677	0.029958	0	0	0	0.0277437	0.0137973	0.00887157	0	0	0.0837428	0.000421863
MosJ 2	Chr 3	43180517	SNV	G	A	EWC	100×WGS	0.0531915	0.160177	h-3		0.000384123	MosJ 2	0.0669245	0.0712674	0.0316796	0.0434902	0.0641879	0.0625027	0.0525126	0.00881453	0.0376762	0.0255393	0.0262559	0.0274349	0.0443979	0.0188262	0.025577	0.0238596	0.205453	0.19939	0.233087	0.168331	0.246394	0.0523536	0.0624841	0.0414325	0.210531	0.078193	13	0.265306	0	0.034011	0.0173735	0.00727871	0	0	0.246394	0.00881453
MosJ 3	Chr 3	44980310	SNV	T	G	EWC	100×WGS	0.0697674	0.031401	g-4		0.000860956	MosJ 3	0.0181494	0.0382839	0.075478	0.0317785	0.058157	0.0451283	0.0192782	0.0423894	0.0670527	0.0712524	0.0371328	0.0282815	0.035792	0.0275603	0.079397	0.0452979	0.00994843	0.0118081	0.00924224	0.00963241	0.00106566	0.0563984	0.0379508	0.0452644	0.00833937	0.0372372	0	0	1	0.0280665	0.0114098	0.00738274	0	0	0.079397	0.00106566
MosJ 4	Chr 3	150529800	SNV	C	A	EWC	100×WGS	0.122137	0.133882	a-3		0.000357782	MosJ 4	0.178594	0.169929	0.23004	0.185569	0.13778	0.19116	0.189297	0.226727	0.187886	0.164862	0.24367	0.166032	0.167165	0.184827	0.215306	0.228474	0.129567	0.163019	0.0678129	0.101401	0.0650367	0.185538	0.189499	0.191242	0.105367	0.172574	7	0.142857	3	0.113756	0.0675016	0.0275013	0	0	0.24367	0.0650367
MosJ 5	Chr 3	157542251	SNV	G	A	EWC	100×WGS	0.0806452	0.0426929	u-3		0.000944025	MosJ 5	0.0609007	0.0716672	0.0560662	0.0845129	0.0311923	0.0396562	0.0920664	0.0238302	0.0472959	0.0743732	0.0459939	0.0711347	0.0849944	0.0555427	0.0544099	0.101027	0.0116177	0.0245625	0.0272715	0.0538233	0.0225223	0.0700296	0.0750152	0.0633171	0.0279595	0.0556307	2	0.0408163	3	0.0391541	0.0216778	0.0108672	0	0	0.101027	0.0116177
MosJ 6	Chr 4	28411309	SNV	T	G	EWC	100×WGS	0.0538462	0.040201	u-3		0.000100236	MosJ 6	0.0613494	0.0666956	0.0613152	0.0832012	0.0299943	0.0361373	0.100218	0.0273984	0.0516314	0.0745664	0.0390144	0.0744025	0.0852064	0.0536181	0.0527782	0.105718	0.011863	0.0244751	0.027924	0.0522373	0.0239181	0.0721787	0.0770871	0.0640284	0.0280835	0.0562143	1	0.0204082	3	0.0437655	0.0264685	0.0120309	0	0	0.105718	0.011863
MosJ 7	Chr 5	25452510	SNV	A	G	EWC	100×WGS	0.240741	0.134648	a-3		0.00235954	MosJ 7	0.194718	0.187475	0.22488	0.192653	0.162942	0.190891	0.206179	0.233624	0.213536	0.18006	0.244603	0.166183	0.16497	0.187945	0.248212	0.237523	0.125161	0.176216	0.0734188	0.10978	0.0668592	0.193762	0.197426	0.201532	0.110287	0.181696	5	0.102041	3	0.118502	0.0749095	0.032171	0	0	0.248212	0.0668592
MosJ 8	Chr 5	38864983	SNV	A	T	EWC	100×WGS	0.11236	0.041129	t-2		0.000605111	MosJ 8	0.0232517	0.0395969	0.0436	0.0140465	0.0191859	0.0216626	0.0300263	0.018559	0.0277208	0.0104118	0.0783798	0.0655875	0.0342702	0.0382989	0.0385898	0.0209097	0.00356251	0.00959698	0.00372154	0.00689324	0.000473611	0.0441676	0.0459964	0.0341256	0.00484958	0.0277613	0	0	0	0.0269186	0.0117936	0.00618508	0	0	0.0783798	0.000473611
MosJ 9	Chr 5	61696521	SNV	G	C	EWC	100×WGS	0.288462	0.146552	a-3		5.58005e-05	MosJ 9	0.193029	0.18018	0.239309	0.190297	0.157069	0.190835	0.200266	0.231792	0.204596	0.178887	0.239694	0.166832	0.172909	0.193059	0.238616	0.241616	0.133594	0.171471	0.0696318	0.105996	0.0684474	0.192349	0.194501	0.200324	0.109828	0.180651	4	0.0816327	3	0.11289	0.0603101	0.0309221	0	0	0.241616	0.0684474
MosJ 10	Chr 5	118040448	SNV	T	G	EWC	100×WGS	0.278689	0.131993	a-3		0.000383068	MosJ 10	0.194127	0.187193	0.235743	0.189462	0.161214	0.18984	0.199007	0.229018	0.20813	0.179078	0.24702	0.159135	0.164691	0.196611	0.24529	0.244165	0.124294	0.173087	0.0719793	0.10674	0.0702676	0.195002	0.199008	0.201319	0.109274	0.181309	5	0.102041	3	0.115868	0.0622025	0.0280817	0	0	0.24702	0.0702676
MosJ 11	Chr 6	32459090	SNV	C	G	EWC	100×WGS	0.292929	0.300086	a-2		0.000191608	MosJ 11	0.295228	0.298462	0.316224	0.277062	0.30681	0.293641	0.304847	0.308796	0.285312	0.330838	0.326176	0.233695	0.291371	0.295082	0.309002	0.304427	0.334736	0.38763	0.307473	0.281598	0.318575	0.294648	0.286889	0.297695	0.326002	0.303849	16	0.326531	5	0.180614	0.0908248	0.0433986	0	0	0.38763	0.233695
MosJ 12	Chr 6	51631763	SNV	T	C	EWC	100×WGS	0.184211	0.174603	u-1		0.00462003	MosJ 12	0.190391	0.162283	0.14279	0.219193	0.162244	0.206099	0.160463	0.169913	0.186772	0.154013	0.112391	0.197064	0.188034	0.165688	0.162386	0.182221	0.156715	0.105865	0.198056	0.211978	0.18702	0.161475	0.171204	0.171924	0.171927	0.171924	7	0.142857	6	0.102499	0.0658001	0.0255931	0	0	0.219193	0.105865
MosJ 13	Chr 6	132883301	SNV	T	C	EWC	100×WGS	0.0727273	0.0269841	t-2		0.00397567	MosJ 13	0.0233101	0.0363253	0.0442109	0.0133671	0.0216925	0.023873	0.0277663	0.0176953	0.0261782	0.012306	0.0732599	0.0604276	0.0323571	0.0345028	0.0413815	0.0209377	0.0037155	0.0110064	0.00386089	0.0081981	0.00101818	0.0505003	0.0469087	0.0337222	0.00555982	0.0276	0	0	0	0.0265214	0.012257	0.00576169	4.17805e-05	-4.17805e-05	0.0732599	0.00101818
MosJ 15	Chr 8	60387990	SNV	G	C	EWC	100×WGS	0.102041	0.0638468	u-2		0.0012005	MosJ 15	0.101049	0.113494	0.0896105	0.118076	0.0793488	0.12798	0.119609	0.134336	0.0769615	0.102067	0.0899771	0.100815	0.0949652	0.0953578	0.0816372	0.131343	0.015975	0.0360796	0.0301084	0.0612452	0.0262489	0.0986201	0.110263	0.103639	0.0339314	0.0884855	3	0.0612245	4	0.055229	0.0251818	0.0147918	5.17974e-05	-5.17974e-05	0.134336	0.015975
MosJ 17	Chr 10	72899626	SNV	C	A	EWC	100×WGS	0.0720721	0.133731	h-3		0.000638424	MosJ 17	0.0723813	0.0787526	0.031327	0.0460554	0.0678192	0.0667737	0.0534656	0.00870436	0.0330499	0.0308112	0.0292273	0.0310925	0.0474393	0.0197137	0.0281749	0.0261277	0.206752	0.20826	0.242063	0.171215	0.25601	0.0542654	0.0590086	0.0435661	0.21686	0.0812386	10	0.204082	0	0.0349761	0.0165189	0.00841861	0	0	0.25601	0.00870436
MosJ 18	Chr 10	74493454	SNV	C	T	EWC	100×WGS	0.0727273	0.027193	g-4		0.00340731	MosJ 18	0.0139652	0.0376708	0.082166	0.0290583	0.0641547	0.047277	0.0195832	0.0428335	0.0649896	0.0775705	0.0355768	0.0254016	0.0302949	0.0269353	0.0753999	0.0448999	0.0077532	0.0121229	0.0080777	0.0102837	0.00115638	0.0559033	0.0348151	0.0449164	0.00787878	0.0368648	0	0	1	0.0201717	0.0102971	0.00478755	0	0	0.082166	0.00115638
MosJ 20	Chr 11	13758835	SNV	G	A	EWC	100×WGS	0.152174	0.0724638	u-2		0.00119063	MosJ 20	0.101543	0.106068	0.085715	0.119758	0.0833408	0.133728	0.119915	0.137994	0.0752082	0.106437	0.0849059	0.0905135	0.100778	0.097142	0.0816834	0.133297	0.0170287	0.0373395	0.0310689	0.0646806	0.029535	0.0974354	0.107762	0.103512	0.0359305	0.0888206	2	0.0408163	4	0.0634985	0.0373698	0.0161542	0	0	0.137994	0.0170287
MosJ 23	Chr 11	118789688	SNV	C	T	EWC	100×WGS	0.111111	0.0994764	a-4		0.0013238	MosJ 23	0.172649	0.143786	0.158105	0.15389	0.0957321	0.137538	0.175842	0.189586	0.143292	0.0998565	0.199684	0.142275	0.131069	0.157518	0.162239	0.201576	0.114526	0.156047	0.0591899	0.101509	0.0686018	0.134158	0.150669	0.152748	0.0999749	0.141276	7	0.142857	2	0.09182	0.0478504	0.0256282	0	0	0.201576	0.0591899
MosJ 25	Chr 13	9843606	SNV	C	T	EWC	100×WGS	0.178082	0.130601	a-3		0.000624523	MosJ 25	0.197547	0.201589	0.237726	0.205838	0.164476	0.191874	0.200938	0.237781	0.224112	0.184605	0.255964	0.156643	0.173679	0.191758	0.240648	0.250659	0.130616	0.173735	0.0734841	0.109365	0.0739922	0.193039	0.199901	0.206043	0.112238	0.185651	7	0.142857	3	0.11371	0.0681284	0.0305474	0	0	0.255964	0.0734841
MosJ 27	Chr 13	41601495	SNV	G	A	EWC	100×WGS	0.333333	0.31533	a-1		0.000785634	MosJ 27	0.301729	0.324295	0.349464	0.289813	0.326654	0.317494	0.330153	0.326429	0.310732	0.342964	0.373832	0.295551	0.329309	0.331657	0.347324	0.31731	0.339413	0.393994	0.309609	0.287813	0.320659	0.33804	0.323165	0.32644	0.330297	0.327278	16	0.326531	5	0.193246	0.0967127	0.0478072	0	0	0.393994	0.287813
MosJ 28	Chr 13	52744135	SNV	G	A	EWC	100×WGS	0.0789474	0.137304	x-2		0.00116678	MosJ 28	0.0858877	0.0491215	0.0518551	0.101682	0.0886958	0.0539705	0.0514709	0.0322676	0.104967	0.0561741	0.0184577	0.107749	0.0847978	0.0699496	0.0740366	0.047249	0.14389	0.0649381	0.160175	0.151272	0.153724	0.0598757	0.063455	0.066759	0.1348	0.0815505	7	0.142857	2	0.037406	0.0176746	0.0066472	0	0	0.160175	0.0184577
MosJ 30	Chr 14	96805436	SNV	G	A	EWC	100×WGS	0.11236	0.061008	u-2		0.0006035	MosJ 30	0.0972437	0.117562	0.0902377	0.11621	0.0859671	0.128742	0.114564	0.136073	0.0805265	0.101965	0.0867585	0.0865532	0.0976744	0.100219	0.0788802	0.130253	0.0164837	0.0370957	0.0311208	0.0627645	0.0273389	0.102919	0.110264	0.103478	0.0349607	0.0885833	2	0.0408163	4	0.0618443	0.0342212	0.0138938	0	0	0.136073	0.0164837
MosJ 33	Chr 17	29033738	SNV	A	T	EWC	100×WGS	0.118812	0.109076	x-2		0.000380066	MosJ 33	0.085417	0.0467404	0.0520998	0.100076	0.0901527	0.0580411	0.0583675	0.0351669	0.108818	0.0609384	0.0198851	0.103622	0.0842969	0.0761399	0.0796092	0.0494333	0.144629	0.0699523	0.164033	0.148389	0.160176	0.0589654	0.0656546	0.0685236	0.137436	0.0835045	7	0.142857	2	0.0328894	0.0156182	0.00854517	0	0	0.164033	0.0198851
MosJ 34	Chr 18	31002810	SNV	A	G	EWC	100×WGS	0.0530973	0.0269627	t-2		0.00441334	MosJ 34	0.0256228	0.0389533	0.0454179	0.0125239	0.0233667	0.0261938	0.0279582	0.0195124	0.0269017	0.0133417	0.0818844	0.0683352	0.035409	0.0372185	0.0419825	0.0231992	0.0037776	0.0106989	0.00381767	0.0081337	0.00063146	0.0494005	0.047941	0.0358424	0.00541186	0.0292271	0	0	0	0.0309477	0.0156396	0.00917068	0	0	0.0818844	0.00063146
MosJ 35	Chr 19	7495976	SNV	G	C	EWC	100×WGS	0.15493	0.136322	a-3		4.74586e-05	MosJ 35	0.190737	0.19236	0.229721	0.19731	0.167819	0.18259	0.199975	0.234249	0.21205	0.191408	0.253801	0.171678	0.159092	0.190367	0.251465	0.251324	0.132739	0.177381	0.0727718	0.108012	0.0718857	0.194893	0.193939	0.203599	0.112558	0.183807	6	0.122449	3	0.100072	0.0531626	0.0239799	0	0	0.253801	0.0718857
MosJ 37	Chr 4	115039628	indel	TC	T	EWC	100×WGS	0.207921	0.178727	u-1	indel	0.000159426	MosJ 37	0.189977	0.159118	0.143666	0.214337	0.169423	0.179827	0.166356	0.16815	0.185676	0.158522	0.100933	0.193087	0.183829	0.174509	0.154246	0.178123	0.152072	0.0991578	0.190202	0.206076	0.183234	0.157966	0.170029	0.169321	0.166148	0.168631	6	0.122449	6	0.0929663	0.0467043	0.0290761	0	0	0.214337	0.0991578
MosJ 38	Chr 5	60254092	indel	AT	A	EWC	100×WGS	0.0891089	0.0232342	t-2	indel, High VAF in negative control	0.0305512	MosJ 38	0.023634	0.0404687	0.0397484	0.0156449	0.0248028	0.0245896	0.0261102	0.0190687	0.0287267	0.0136608	0.0755608	0.065146	0.0356434	0.039256	0.0391585	0.0227414	0.00477752	0.0105142	0.00175267	0.00916028	0.000238678	0.0495704	0.0411655	0.0347054	0.00528867	0.0283104	0	0	0	0.0282078	0.016363	0.00780689	0	0	0.0755608	0.000238678
MosJ 40	Chr 6	101850462	indel	GA	G	EWC	100×WGS	0.0860215	0.0658579	a-5	indel	6.23675e-05	MosJ 40	0.093427	0.100468	0.103843	0.129584	0.0731311	0.0883298	0.0464141	0.0649837	0.0830187	0.04833	0.129458	0.0577649	0.0841583	0.101909	0.115326	0.0683632	0.103976	0.138803	0.0511169	0.0885453	0.0655919	0.0713887	0.0751967	0.085283	0.0896066	0.0862229	4	0.0816327	2	0.0431054	0.0248532	0.0116269	0	0	0.138803	0.0464141
MosJ 42	Chr 11	17786233	indel	TTA	T	EWC	100×WGS	0.271186	0.205525	u-1*	indel, High VAF in negative control, cell position was manually determined	0.174736	MosJ 42	0.179996	0.165897	0.156877	0.211383	0.185331	0.188202	0.176053	0.127334	0.200083	0.170327	0.128688	0.187554	0.201002	0.186624	0.163327	0.18945	0.166438	0.077539	0.145791	0.154624	0.140022	0.122234	0.188953	0.173851	0.136883	0.165814	6	0.122449	6	-0.00499283	0.00742334	-0.00649239	0	0	0.211383	0.077539
MosJ 45	Chr 15	69937436	indel	AT	A	EWC	100×WGS	0.0864198	0.0334317	e-3	indel, High VAF in negative control, cell position was determined by ntES cell (in 100×WGS)	0.0262714	MosJ 45	0.0691238	0.0281343	0.0208644	0.0720411	0.0482697	0.0425145	0.032659	0.027422	0.0475824	0.041128	0.00567146	0.0643688	0.0451987	0.0510367	0.0199048	0.0308233	0.00561934	0.0141121	0.00353512	0.00677846	0.00117122	0.0390198	0.0461112	0.0406597	0.00624324	0.0331778	0	0	1	0.0286641	0.0178833	0.00830329	0	0	0.0720411	0.00117122
MosJ 53	Chr 9	12444215	SNV	C	T	noEWC	100×WGS	0.0421053	0.104357	x-2		0.00179022	MosJ 53	0.0872279	0.052322	0.0531427	0.103713	0.0805205	0.0554711	0.0549924	0.032908	0.108518	0.0518355	0.0197771	0.107447	0.0909207	0.0769801	0.079541	0.0513219	0.139865	0.0675061	0.163378	0.149076	0.155955	0.0595139	0.0605229	0.0681487	0.135156	0.0827155	6	0.122449	2	0.0355351	0.0153767	0.00843961	0	0	0.163378	0.0197771
MosJ 55	Chr 9	75750049	SNV	T	C	noEWC	100×WGS	0.0588235	0.0590015	a-5	High VAF in negative control	0.0122635	MosJ 55	0.0920055	0.0890165	0.0951971	0.125612	0.069017	0.0780795	0.0407505	0.0587615	0.0793309	0.0422431	0.121503	0.064314	0.074754	0.0926621	0.101541	0.0693202	0.0976367	0.126712	0.0493642	0.0783885	0.0561644	0.0639276	0.0671926	0.0791793	0.0816532	0.0797171	4	0.0816327	2	0.0362958	0.0203001	0.00875785	6.51784e-05	-6.51784e-05	0.126712	0.0407505
MosJ 56	Chr 10	106639317	SNV	C	G	noEWC	100×WGS	0.0727273	0.135569	h-3		4.78973e-05	MosJ 56	0.0651462	0.0739177	0.0308817	0.0490943	0.072268	0.0592237	0.0494509	0.00836998	0.0356597	0.0254957	0.0246312	0.0262912	0.0489944	0.0179659	0.0253156	0.0233118	0.214766	0.199346	0.238145	0.166507	0.249524	0.0528593	0.0604469	0.0416291	0.213658	0.0790266	10	0.204082	0	0.0313699	0.0123393	0.0083213	0	0	0.249524	0.00836998
MosJ 58	Chr 15	52878947	SNV	T	G	noEWC	100×WGS	0.0588235	0.0341297	e-5		0.00204029	MosJ 58	0.0746833	0.0539697	0.0596397	0.0266075	0.020312	0.0490467	0.132028	0.12012	0.0543449	0.06099	0.0781128	0.0746038	0.0539875	0.0576295	0.0525354	0.119702	0.0121536	0.0205642	0.00976279	0.0122244	0.00148495	0.0616822	0.080324	0.0683511	0.011238	0.0559352	0	0	0	0.0380435	0.0200871	0.0102383	0.00011389	-0.00011389	0.132028	0.00148495
MosJ 59_div2	Chr X	122693584	SNV	A	C	noEWC	100×WGS	0.0545455		ND		0.000573862	MosJ 59_div2	3.02784e-05	2.29749e-05	2.0808e-05	-8.15038e-05	1.83007e-06	-0.000138626	1.5892e-05	-2.23303e-05	0.000124885	-8.83173e-05	-3.53385e-05	5.06788e-05	6.50144e-06	0.00012642	7.48039e-05	-3.60134e-05	2.45232e-06	4.93897e-05	0.0001675	6.2773e-06	6.87817e-05	0.00974629	0.0246435	0.0019146	5.88802e-05	0.00151118	0	0	0	0.0121985	0.00671838	0.00327022	3.55704e-05	-3.55704e-05	0.0246435	-0.000138626
MosJ 66	Chr 2	65276098	SNV	G	A	EWC	900×WGS		0.0213493	x-6		0.00118141	MosJ 66	6.42366e-05	3.30939e-05	9.45966e-05	-5.06054e-05	-3.31004e-05	1.69899e-06	0.000210495	8.691e-06	0.000144929	7.45427e-05	-9.64567e-05	-0.000146935	5.70682e-05	-0.000126814	5.32021e-05	7.49784e-05	0.0334846	0.0130228	0.0489243	0.0611091	0.026061	-1.62482e-06	5.54241e-05	2.319e-05	0.0365204	0.00795736	0	0	0	-0.000325317	4.18228e-05	-0.000412026	-0.00013128	0.00013128	0.0611091	-0.000146935
MosJ 67	Chr 12	10106637	SNV	G	C	EWC	900×WGS		0.0218447	a-7		0.000549453	MosJ 67	0.0178574	0.00149672	0.0114668	0.0117672	0.0273486	0.0107281	0.00180809	0.00466482	0.016831	0.0335472	0.0276991	0.0275433	0.00866384	0.0265709	0.00758267	0.00732496	0.0945363	0.124254	0.0430371	0.0804528	0.0645178	0.00700603	0.00750704	0.0143008	0.0813596	0.0288788	4	0.0816327	1	0.0029454	0.00194298	0.00132765	-7.75689e-05	7.75689e-05	0.124254	0.00149672
MosJ 68	Chr 18	27437337	SNV	T	A	EWC	900×WGS		0.0229592	g-4		0.000136949	MosJ 68	0.0169219	0.0407959	0.0797498	0.034348	0.0621692	0.046315	0.0207705	0.0428713	0.0665173	0.077234	0.0382746	0.0339689	0.032576	0.0282724	0.0774289	0.0441104	0.0101661	0.0114804	0.00939476	0.010307	0.00153394	0.0597121	0.0417374	0.0468763	0.00857643	0.0385502	0	0	1	0.0228217	0.00993831	0.00512533	-2.3885e-05	2.3885e-05	0.0797498	0.00153394
MosJ 70	Chr 15	39038162	SNV	T	A	EWC	900×WGS		0.0255387	r-3		0.000597086	MosJ 70	0.031164	0.0396133	0.0512821	0.0325837	0.0873112	0.0474299	0.0553768	0.0704129	0.0463515	0.129284	0.0444729	0.0450662	0.075769	0.0913269	0.0463486	0.0349258	0.00531719	0.012893	0.00553196	0.00820085	0.00129605	0.0501632	0.0306908	0.0560874	0.0066478	0.0453397	0	0	2	0.0189612	0.00921509	0.00309113	1.91288e-05	-1.91288e-05	0.129284	0.00129605
MosJ 71	Chr 5	127791331	SNV	G	A	EWC	900×WGS		0.0257611	o-6		0.00108514	MosJ 71	-0.000185733	4.1684e-06	0.000128152	-0.000175382	-3.78415e-06	9.61355e-05	-4.3841e-05	-9.99626e-05	-7.57193e-05	-0.000144452	-5.04023e-05	-0.000143949	-0.000146208	6.66777e-05	1.83727e-05	-2.4565e-05	0.0400555	0.0113071	0.0508786	0.00971285	0.0208694	-0.00021699	-3.05026e-05	-5.71102e-05	0.0265647	0.00573024	1	0.0204082	0	-0.000169081	-7.52356e-05	-0.000101792	-2.21429e-05	2.21429e-05	0.0508786	-0.00021699
MosJ 72	Chr 6	138556245	SNV	A	T	EWC	900×WGS		0.0260138	o-6		0.000353171	MosJ 72	-5.504e-05	7.18464e-05	-1.96893e-05	2.49551e-05	4.84839e-05	3.37122e-05	5.04392e-05	-1.98229e-05	-1.04466e-05	8.2058e-05	0.000115221	7.18315e-05	-1.07184e-05	0.000467033	7.07806e-06	7.72087e-05	0.0383992	0.0124064	0.0522795	0.0118681	0.021424	6.34233e-06	4.67204e-05	5.48451e-05	0.0272754	0.00597237	1	0.0204082	0	3.6698e-05	8.4121e-05	4.2358e-05	-2.35494e-05	2.35494e-05	0.0522795	-5.504e-05
MosJ 73	Chr 12	24393082	SNV	G	A	EWC	900×WGS		0.026738	h-9*	Cell position determined by offspring	0.00105607	MosJ 73	1.41208e-05	-1.55101e-06	0.000243667	-2.30073e-06	3.92859e-05	-0.000101415	0.000176455	0.000172552	0.000216883	-5.67864e-05	0.000244975	9.12164e-05	8.53632e-05	7.33917e-05	3.19848e-05	0.000146314	0.0338307	0.0086638	0.0499639	0.0185716	0.0525503	-9.06993e-05	-2.42983e-05	6.99532e-05	0.0327161	0.00716693	2	0.0408163	0	-0.000162449	-1.53625e-05	2.08228e-05	-3.32943e-05	3.32943e-05	0.0525503	-0.000101415
MosJ 74	Chr 1	11382055	SNV	G	C	EWC	900×WGS		0.0270701	d-6		0.000846299	MosJ 74	0.0723211	0.0920528	0.0597315	0.100601	0.0375553	0.026298	0.0135334	0.0456237	0.0242016	0.00806162	0.0897031	0.0349728	0.0438363	0.057215	0.0642946	0.0340605	0.00396877	0.00976907	0.00246935	0.00247957	0.000913609	0.03715	0.0387586	0.0488873	0.00392007	0.0391118	0	0	1	0.0198056	0.00943133	0.00537694	5.59287e-05	-5.59287e-05	0.100601	0.000913609
MosJ 75	Chr 4	43528155	SNV	C	T	EWC	900×WGS		0.0303929	o-5		0.00160576	MosJ 75	0.000298507	-3.11881e-05	9.24557e-05	-5.27806e-05	5.51579e-05	3.89486e-05	0.000292243	0.000247132	0.0182022	0.000280036	0.000270056	6.1034e-06	0.00014527	0.000963464	0.000250544	3.1504e-05	0.0399251	0.0122786	0.0501489	0.011491	0.0181406	0.000198198	-0.000169093	0.00117326	0.0263969	0.00665665	0	0	0	0.00021088	0.000318723	-9.62419e-05	2.10926e-05	-2.10926e-05	0.0501489	-0.000169093
MosJ 76	Chr 13	84930481	SNV	G	A	EWC	900×WGS		0.0549915	x-4		0.00120192	MosJ 76	0.000206057	0.000172022	0.000351357	9.36095e-05	5.96976e-05	9.57957e-05	1.50604e-05	0.000474908	0.000211164	-9.36686e-05	0.000219314	0.0002866	0.000323193	9.9873e-05	0.000241093	0.000473476	0.096943	0.0230631	0.120932	0.0795085	0.100481	-0.000121908	-5.30054e-05	0.000169702	0.0841855	0.018434	6	0.122449	0	-6.47519e-06	0.000164781	0.000349548	-0.00017496	0.00017496	0.120932	-0.000121908
MosJ 77	Chr 18	86920934	SNV	T	A	EWC	900×WGS		0.0554675	h-7		0.000469011	MosJ 77	-3.55566e-05	-9.5586e-05	-5.18626e-05	-0.000122041	-4.15835e-05	-0.000141404	-4.10514e-05	7.47587e-05	-2.45239e-05	-6.06445e-05	-4.3103e-05	0.00013255	-9.04681e-05	-1.26896e-05	-2.69054e-05	4.10322e-05	0.107218	0.0987331	0.123889	0.0631355	0.177279	-0.000125981	-6.37768e-05	-4.04909e-05	0.114051	0.024762	3	0.0612245	0	-5.83408e-05	-8.42427e-05	3.9903e-05	-6.17099e-05	6.17099e-05	0.177279	-0.000141404
MosJ 78_div2	Chr X	115773248	SNV	C	A	EWC	900×WGS		0.0807249	x-5		0.000105128	MosJ 78_div2	2.38614e-06	1.89764e-05	5.71156e-05	-2.60003e-05	4.69023e-05	0.00012053	3.79421e-05	2.44358e-05	0.000127113	-2.96019e-05	-1.01212e-05	3.83098e-05	-2.15065e-05	-3.91704e-05	-1.67555e-05	-2.94238e-06	0.0346258	0.0138988	0.125284	0.0695191	0.0694945	-2.56732e-05	6.70034e-05	2.04969e-05	0.0625645	0.013617	1	0.0204082	0	6.67995e-06	2.36513e-05	3.72996e-05	-7.27739e-07	7.27739e-07	0.125284	-3.91704e-05
MosJ 79	Chr 4	113727133	SNV	A	G	EWC	900×WGS		0.08285	x-3		0.0034546	MosJ 79	0.0155188	0.0221582	0.0368959	0.0258251	0.0316786	0.0122038	0.0161902	0.00883663	0.0557513	0.00980768	0.0123821	0.0316649	0.0381953	0.0217382	0.0526541	0.0174761	0.135667	0.0550417	0.155786	0.141214	0.152654	0.0192643	0.0128139	0.0245031	0.128072	0.0470182	6	0.122449	1	0.00719438	0.0036278	0.0020413	-0.000111787	0.000111787	0.155786	0.00883663
MosJ 80	Chr 7	33525242	SNV	T	G	EWC	900×WGS		0.0840787	x-3		0.00274019	MosJ 80	0.0141496	0.0203546	0.0354501	0.02677	0.031071	0.0119613	0.0178495	0.00778415	0.0622678	0.0102018	0.0117573	0.0314643	0.0399068	0.0206907	0.054608	0.0168939	0.138698	0.0531189	0.161183	0.144499	0.157618	0.0194697	0.01292	0.0247539	0.131023	0.047856	7	0.142857	1	0.00688938	0.00331351	0.0028491	4.32524e-05	-4.32524e-05	0.161183	0.00778415
MosJ 81	Chr 1	30848799	SNV	G	A	EWC	900×WGS		0.0869925	x-3		0.00126796	MosJ 81	0.0141234	0.0213318	0.0327955	0.0284448	0.0311209	0.0129364	0.0147624	0.00769751	0.0554013	0.0101339	0.0122748	0.032353	0.0371141	0.0228399	0.0524814	0.0147291	0.133042	0.0558584	0.155429	0.143674	0.153493	0.0200289	0.0125646	0.024063	0.128299	0.046723	5	0.102041	1	0.00475846	0.00305181	0.00248618	-2.42298e-06	2.42298e-06	0.155429	0.00769751
MosJ 82	Chr 1	184095585	SNV	A	C	EWC	900×WGS		0.0883503	x-3		0.00191878	MosJ 82	0.0134918	0.0197253	0.0332539	0.0275413	0.0287913	0.0124211	0.0155524	0.00590468	0.0554803	0.0102869	0.0111358	0.0309343	0.0363176	0.0218444	0.051489	0.0141489	0.13406	0.0538818	0.155899	0.135483	0.145011	0.0208799	0.0117485	0.023386	0.124867	0.045447	9	0.183673	1	0.0068903	0.0038067	0.00133087	-3.26796e-05	3.26796e-05	0.155899	0.00590468
MosJ 83	Chr 11	42650505	SNV	C	G	EWC	900×WGS		0.0963455	h-6		0.000694282	MosJ 83	0.0162646	0.00768618	0.00261809	0.00411345	0.00155726	-2.56878e-05	0.00210068	0.00017723	0.000319718	0.000392191	0.018142	0.00252184	0.00711081	0.000360059	0.00104385	0.00023902	0.137536	0.169929	0.157225	0.147722	0.211328	0.000244289	6.08344e-05	0.00360702	0.164748	0.0386377	13	0.265306	0	5.5537e-05	6.6159e-05	-1.85238e-05	7.15787e-05	-7.15787e-05	0.211328	-2.56878e-05
MosJ 84	Chr 5	116653758	SNV	C	T	EWC	900×WGS		0.134303	h-4		0.00113202	MosJ 84	0.0475896	0.0441114	0.0190372	0.00991777	0.0233497	0.0115094	0.0049116	0.00224589	0.0232979	0.0230391	0.0227246	0.0118187	0.0152343	0.00597354	0.0154962	0.012757	0.193721	0.19141	0.226434	0.15712	0.236167	0.0289761	0.0337144	0.0197985	0.202637	0.0591546	17	0.346939	0	0.0168296	0.00800009	0.00399787	5.46566e-05	-5.46566e-05	0.236167	0.00224589
MosJ 85	Chr 13	23581720	SNV	G	A	EWC	900×WGS		0.1425	h-3		0.00185137	MosJ 85	0.0691716	0.0731805	0.0293621	0.0428972	0.066579	0.0581528	0.0515203	0.00963275	0.0315992	0.0256682	0.0260156	0.0295662	0.0443851	0.0178345	0.0242397	0.0244945	0.202894	0.202639	0.228355	0.164091	0.24995	0.0504454	0.0606398	0.0408547	0.209586	0.0775354	15	0.306122	0	0.0309914	0.0177208	0.00976089	-8.79214e-07	8.79214e-07	0.24995	0.00963275
MosJ 86	Chr 19	17429587	SNV	C	T	noEWC	900×WGS		0.020219	ND		0.000946242	MosJ 86	5.28745e-05	0.00014067	-8.81051e-05	8.16223e-05	0.000190004	-8.42685e-05	0.000111467	-5.56923e-06	0.000215255	0.000266852	0.000225091	0.000142338	-2.173e-05	0.000261936	0.000274814	-7.43771e-05	0.000144433	2.76362e-05	0.0455127	0.00600048	0.0069493	0.000276728	8.92728e-05	0.00011416	0.0117269	0.00263867	0	0	0	-7.71643e-05	0.000154233	-5.27992e-05	-4.9023e-06	4.9023e-06	0.0455127	-8.81051e-05
MosJ 87	Chr 2	30751634	SNV	C	T	noEWC	900×WGS		0.0230608	o-6		0.00107168	MosJ 87	7.19219e-05	1.25287e-05	-4.01693e-05	8.10012e-05	0.00017763	-0.000192056	-0.000194226	-1.34533e-05	1.07963e-05	-4.18537e-05	-2.13937e-05	8.73974e-05	-3.17502e-05	0.000853547	1.8644e-05	-0.000136461	0.0387166	0.0116908	0.0529027	0.0115045	0.0216049	7.09222e-06	5.66248e-05	3.92123e-05	0.0272839	0.00596197	1	0.0204082	0	-0.000137535	-0.000229691	-3.79303e-05	-5.66717e-05	5.66717e-05	0.0529027	-0.000194226
MosJ 88	Chr 13	92160294	SNV	C	T	noEWC	900×WGS		0.0259615	e-3		0.00042327	MosJ 88	0.073909	0.0290105	0.0228274	0.0792305	0.0530256	0.0415037	0.0395706	0.0293444	0.0480305	0.0431609	0.00672719	0.0647583	0.0475008	0.0544426	0.0199804	0.0303211	0.00665838	0.0119639	0.00358547	0.00902837	0.000680359	0.038658	0.0482762	0.0427932	0.0063833	0.034878	0	0	1	0.0244418	0.0137023	0.00726949	-4.82089e-05	4.82089e-05	0.0792305	0.000680359
MosJ 90	Chr 3	118238695	SNV	C	A	noEWC	900×WGS		0.0299625	a-8		0.000389765	MosJ 90	8.29509e-05	-3.58672e-05	9.59317e-05	-1.12429e-05	-4.8942e-05	8.81293e-05	6.6981e-08	9.963e-05	-4.53223e-05	-5.17822e-05	8.21285e-05	8.03758e-05	0.00011336	7.39948e-05	-5.0042e-05	-9.67406e-06	0.0960033	0.106301	0.0375175	0.0821142	0.0640784	3.78376e-05	3.58329e-05	2.98536e-05	0.0772028	0.0168066	2	0.0408163	0	6.17795e-06	6.00337e-05	0.000135629	-6.63282e-05	6.63282e-05	0.106301	-5.17822e-05
MosJ 91	Chr 7	14728786	SNV	C	T	noEWC	900×WGS		0.0303644	h-8		0.00116807	MosJ 91	5.03163e-05	-0.000136142	-8.11687e-05	-0.000173839	9.02201e-05	-4.10658e-05	3.01361e-05	6.72424e-05	-2.831e-05	-0.000176386	7.57394e-05	6.90869e-05	-1.73791e-05	0.000148529	-0.000115402	-9.18683e-05	0.0513517	0.0452688	0.0582437	0.0293293	0.0952562	0.000183549	0.0001051	-2.31334e-06	0.0558899	0.0121482	4	0.0816327	0	-0.000137715	9.39804e-06	1.31542e-05	6.97569e-05	-6.97569e-05	0.0952562	-0.000176386
MosJ 92	Chr 6	123248662	SNV	G	A	noEWC	900×WGS		0.0444856	x-4		0.00189688	MosJ 92	0.000262211	5.93377e-05	-3.83759e-05	5.68725e-05	-5.11473e-05	9.77539e-05	0.000278833	9.88801e-05	0.000340851	-8.43804e-05	0.000216888	0.000281476	0.000105693	-2.92571e-05	0.000117309	7.67668e-05	0.0935309	0.026967	0.130425	0.0813185	0.109968	-1.62926e-05	0.000238615	0.00011178	0.0884418	0.019314	4	0.0816327	0	4.01998e-05	-9.72326e-05	0.000359596	8.19451e-05	-8.19451e-05	0.130425	-8.43804e-05
MosJ 93	Chr 14	122761461	SNV	A	T	EWC	900×WGS		0.0155483	ND		9.00355e-05	MosJ 93	0.0174902	0.0244843	0.0181817	0.00965234	0.0178589	0.0180317	0.0206282	0.0169751	0.0106486	0.00395024	0.00607578	0.0272306	0.0121863	0.0190648	0.023582	0.0153542	0.000955129	0.0058831	0.002159	0.00572627	0.000384936	0.0287258	0.0252378	0.0175199	0.00302169	0.0143681	0	0	0	0.0126388	0.00834402	0.00358356	9.2806e-06	-9.2806e-06	0.0287258	0.000384936
MosJ 94	Chr 5	57520799	SNV	T	A	EWC	900×WGS		0.0139116	e-4*	Cell position determined by offspring	0.000117602	MosJ 94	0.0175304	0.00452663	0.01535	0.0474019	0.0482233	0.00591833	0.0206915	0.0109734	0.0332757	0.0327416	0.00427525	0.023613	0.0216287	0.0142277	0.0132804	0.0173956	0.00129839	0.00450562	0.00159758	0.00153589	0.000557798	0.0198465	0.0330307	0.0213295	0.00189906	0.0171055	0	0	1	0.0159427	0.00821743	0.00462937	-1.34481e-05	1.34481e-05	0.0482233	0.000557798
MosJ 95_div2	Chr X	79491580	SNV	A	C	EWC	900×WGS		0.0176991	ND		0.000164411	MosJ 95_div2	0.00229038	0.00105245	0.00170361	0.00101952	0.0165453	0.000706912	0.00702846	0.000208285	0.0073403	0.000192954	0.00056841	0.0169775	0.00283924	0.000246028	0.00720141	0.00841797	0.0004656	0.00159705	0.00107574	0.00386091	4.74473e-05	0.0101713	0.00903768	0.0051971	0.00140935	0.00437367	0	0	0	0.00416211	0.0013736	0.00125301	-2.90637e-05	2.90637e-05	0.0169775	4.74473e-05
MosJ 96	Chr 6	61292895	SNV	G	A	EWC	900×WGS		0.0165138	v-3		0.00194742	MosJ 96	0.0407269	0.0472577	0.032611	0.0365909	0.0509166	0.0895035	0.0215279	0.111443	0.0240812	0.0284602	0.0476085	0.0149317	0.0182163	0.0438392	0.0275395	0.0315163	0.00445865	0.00985617	0.00455346	0.00764774	0.00517799	0.0301413	0.0336773	0.0405883	0.0063388	0.0331428	0	0	1	0.0163703	0.00911987	0.0027693	4.32708e-05	-4.32708e-05	0.111443	0.00445865
MosJ 97	Chr 6	61481094	SNV	C	T	EWC	900×WGS		0.0188216	ND		0.00251522	MosJ 97	0.00811817	0.000156895	0.0394584	0.0350601	0.00162678	0.0141518	0.00290593	0.00275796	0.0120957	0.00131306	0.00878322	0.0105094	0.0067783	0.00141281	0.0416021	0.00333421	0.000846256	0.00342782	0.000753655	0.00106243	0.000381634	0.0117158	0.0200287	0.0123227	0.00129436	0.00992526	0	0	0	0.0105137	0.00615294	0.00266707	-0.000207233	0.000207233	0.0416021	0.000156895
MosJ 98	Chr 10	97155225	SNV	T	C	EWC	900×WGS		0.011324	b-4*	Cell position determined by offspring	0.00390044	MosJ 98	0	0	0	0	0	0	0.000359195	0	0	0	0	0	0	0	-4.26946e-05	0	0.0361313	0.0209702	0.0269355	0.0537538	0.0470826	0	0.000285448	3.34416e-05	0.0369747	0.00806414	3	0.0612245	0	nt	nt	nt	nt	0	0.0537538	-4.26946e-05
MosJ 99	Chr 2	164195677	SNV	G	A	EWC	900×WGS		0.0128593	ND_Group1		0.00118077	MosJ 99	0	0	0	0	0	0	-6.70427e-05	0	0	0	0	5.67013e-05	0	2.59409e-05	1.52915e-05	0	-8.92112e-05	7.23014e-05	0.0291213	0.0111588	0.00839523	0	-7.42504e-05	-2.40886e-06	0.00973168	0.0021137	0	0	0	nt	nt	nt	nt	0	0.0291213	-8.92112e-05
MosJ 101	Chr 2	39711459	SNV	C	T	EWC	900×WGS		0.0130776	k-7		0.00122732	MosJ 101	0	0	0	0	0	0	6.28876e-06	0	3.22196e-05	0	0	0	0	0	-1.68744e-06	0	0.0338401	0.0750477	0.0361036	0.0796556	0.0462475	0	-0.00010913	-4.01715e-06	0.0541789	0.0117749	4	0.0816327	0	nt	nt	nt	nt	0	0.0796556	-0.00010913
MosJ 102	Chr 3	102121874	SNV	G	A	EWC	900×WGS		0.013181	ND_Group1		0.00128647	MosJ 102	0	0	0	0	0	0	-3.45386e-05	0	0	0	0	0	0	0	-1.94358e-05	0	-0.000144952	-0.00018123	0.0321536	0.0114029	0.00910548	0	0.000119655	3.64895e-06	0.0104672	0.00227833	0	0	0	nt	nt	nt	nt	0	0.0321536	-0.00018123
MosJ 103	Chr 7	101516067	SNV	G	A	EWC	900×WGS		0.0134357	ND_Group1		0.00135465	MosJ 103	0	1.4561e-06	0	0	0	0	-4.75593e-06	0	4.04119e-05	1.81858e-05	0	0	7.16832e-06	4.79811e-05	0.000124093	0	0.000153726	-1.45109e-05	0.0314661	0.0106499	0.00941649	0	0.000368238	3.34877e-05	0.0103343	0.00227281	1	0.0204082	0	nt	nt	nt	nt	0	0.0314661	-1.45109e-05
MosJ 104	Chr 17	92102208	SNV	G	C	EWC	900×WGS		0.014827	a-8		0.000254652	MosJ 104	0	0	0	0	0	0	-5.60552e-05	0	0	0	0	0	0	0	-6.13752e-06	0	0.094842	0.116378	0.0383508	0.0805081	0.061911	0	-0.000125572	-1.04313e-05	0.0783979	0.0170349	7	0.142857	0	nt	nt	nt	nt	0	0.116378	-0.000125572
MosJ 105	Chr 6	106329759	SNV	G	A	EWC	900×WGS		0.0151274	b-4*	Cell position determined by offspring	0.00104415	MosJ 105	0	0	0	0	0	0	-0.000222823	0	0	0	0	0	0	0	2.88303e-05	0	0.0384826	0.0207192	0.0207192	0.0501214	0.0468503	0	-7.1918e-05	-1.47728e-05	0.0353785	0.00767943	1	0.0204082	0	nt	nt	nt	nt	0	0.0501214	-0.000222823
MosJ 106	Chr 7	26325272	SNV	C	T	EWC	900×WGS		0.0145414	k-8*	Cell position determined by offspring	0.000814589	MosJ 106	0	7.54232e-06	0	0	3.817e-05	0	1.54384e-05	0	9.45865e-05	1.13546e-06	4.74419e-05	3.23548e-05	0	1.22399e-06	1.07918e-05	0	-2.99028e-05	-2.86658e-05	0.0265903	0.0179643	0.00679444	0	2.40245e-05	1.51505e-05	0.0102581	0.00224188	1	0.0204082	0	nt	nt	nt	nt	0	0.0265903	-2.99028e-05
MosJ 107	Chr 1	87737181	SNV	A	C	EWC	900×WGS		0.0152526	b-5*	Cell position determined by offspring	8.19353e-05	MosJ 107	8.89674e-05	5.91044e-05	6.50753e-05	5.66589e-05	7.35365e-05	5.9067e-05	2.38999e-05	9.70371e-05	8.66676e-05	5.3537e-05	5.86775e-05	0.000100663	6.15719e-05	7.81145e-05	7.16367e-05	7.09107e-05	0.00693933	0.00453484	0.0201593	0.0347226	0.0313015	2.92751e-05	8.86472e-05	6.79471e-05	0.0195315	0.00429916	1	0.0204082	0	nt	nt	nt	nt	0	0.0347226	2.38999e-05
MosJ 108	Chr 1	180795369	SNV	T	G	EWC	900×WGS		0.0168244	ND	High VAF in negative control	0.0344456	MosJ 108	0.000471793	0.000665254	0.000683415	0.000268574	0.00206968	0.00199965	0.000715037	0.00115532	0.000695382	0.00101651	0.00154566	0.00190745	0.00127717	0.00106831	0.000275478	0.00187983	0.0229945	0.00528338	0.0261112	0.00351905	0.016822	0.00151109	-0.000977981	0.00101265	0.014946	0.00404164	0	0	0	nt	nt	nt	nt	0	0.0261112	-0.000977981
MosJ 109	Chr 14	119108078	SNV	G	A	EWC	900×WGS		0.0196918	x-7		0.00411024	MosJ 109	0	0	0	0	0	0	-0.000182868	0	0	0	0	0	0	0	-9.10603e-05	0	0.000287673	-8.52659e-05	0.0497566	0.061511	0.0207978	0	-0.00011381	-2.1541e-05	0.0264536	0.00573392	0	0	0	nt	nt	nt	nt	0	0.061511	-0.000182868
MosJ 110	Chr 16	81938367	SNV	C	A	noEWC	900×WGS		0.0150235	ND		0.00139002	MosJ 110	7.0037e-05	0	0.000172391	0	6.77352e-05	0.000107344	-0.000122709	0	0.000104588	9.84214e-05	0.000178924	0.000101545	4.32255e-05	0.000138583	-3.71429e-06	0.000259676	0.00205725	0.000640289	0.0205178	-0.00012688	0.0103461	8.92292e-06	7.5296e-05	-2.84043e-06	0.00668691	0.00151021	0	0	0	nt	nt	nt	nt	0	0.0205178	-0.00012688
MosJ 113	Chr 3	144622373	SNV	G	A	noEWC	900×WGS		0.0183206	b-4*	Cell position determined by offspring	0.000254654	MosJ 113	-5.03217e-05	0.00012037	0.00132399	0.000613885	0.0010733	0.000673147	-1.92117e-05	0.000245072	0.000105473	0.00144207	0.0012885	0.00160472	4.22712e-05	0.000357696	0.000971212	0.000752058	0.0400968	0.0196972	0.0267999	0.0549657	0.0531827	0.0027595	0.000890588	0.000788573	0.0389485	0.0090842	1	0.0204082	0	0.000210849	0.00104503	0.00010701	4.48533e-07	-4.48533e-07	0.0549657	-5.03217e-05
MosJ 114_double	Chr 4	147500843	SNV	C	T	noEWC	900×WGS		0.0332661	h-5	Suspected tandem duplication region	0.00038709	MosJ 114_double	0.0484239	0.0478701	0.0142048	0.00955273	0.0110743	0.0104799	0.00621908	0.00152137	0.00575429	0.0202258	0.0206479	0.0103955	0.0114171	0.00604396	0.0157324	0.00692861	0.141242	0.173339	0.163117	0.150168	0.217218	0.0242303	0.0241992	0.0163845	0.169017	0.0495654	6	0.122449	0	0.0107449	0.00576116	0.00212393	-0.000131767	0.000131767	0.217218	0.00152137
MosJ 115	Chr 1	58092006	SNV	G	A	EWC	900×WGS		0.0127055	ND		0.00115905	MosJ 115	0.00963697	0.0225815	0.00423065	0.0060488	0.00282633	0.0243825	0.0463803	0.000807475	0.00330604	0.000580467	0.000451146	0.00705697	0.0276166	0.0122441	0.00378518	0.00447909	0.00038289	0.00157824	0.00265641	0.000874769	0.00018258	0.0105034	0.0100542	0.0109429	0.00113498	0.00881072	0	0	0	0.00378931	0.00132986	0.000893429	0.000161609	-0.000161609	0.0463803	0.00018258
MosJ 122	Chr 4	116050665	SNV	G	T	EWC	900×WGS		0.112815	x-2		0.00165141	MosJ 122	0.0883614	0.0484735	0.053562	0.105666	0.0842436	0.0598301	0.052334	0.0318239	0.107685	0.0558354	0.0160127	0.0949342	0.088201	0.0744526	0.0751337	0.0520093	0.136528	0.0657594	0.160321	0.148263	0.156481	0.0570386	0.0592467	0.0669358	0.133471	0.0813999	5	0.102041	2	0.0305115	0.0170896	0.00784759	4.71611e-05	-4.71611e-05	0.160321	0.0160127
MosJ 124	Chr 5	67765158	SNV	C	T	EWC	900×WGS		0.0121766	ND		0.000821847	MosJ 124	0.0024324	0.00216967	0.00199439	0.00485393	0.0170487	0.000791915	0.0067167	0.000625086	0.00662257	0.000164852	0.00196592	0.0183757	0.00382342	-4.93557e-06	0.00784768	0.00663609	0.000342394	0.00268906	0.00151409	0.00391467	0.000134455	0.0126034	0.0145056	0.00606517	0.00171893	0.00512034	0	0	0	0.00718071	0.00346793	0.00210358	-3.79402e-05	3.79402e-05	0.0183757	-4.93557e-06
MosJ 125	Chr 6	63544839	SNV	G	A	EWC	900×WGS		0.0114035	k-8*	Cell position determined by offspring	0.00112345	MosJ 125	-6.82827e-05	-7.15741e-05	-8.61654e-05	-0.000146241	-8.36123e-06	-6.23925e-05	9.44466e-05	-0.000101688	-4.82038e-05	-4.50473e-05	-1.20803e-06	-0.000145481	-9.20081e-05	1.00238e-05	0.000119137	1.32911e-05	-5.04919e-05	3.18781e-05	0.021318	0.0129779	0.00692647	-9.85327e-05	-9.26525e-05	-4.61634e-05	0.00824075	0.00175534	1	0.0204082	0	1.75855e-05	-6.19958e-05	-0.000192628	-2.96097e-05	2.96097e-05	0.021318	-0.000146241
MosJ 126	Chr 9	81745263	indel	C	CT	EWC	900×WGS		0.0397112	a-6	indel	0.000194615	MosJ 126	0.0232901	0.00559447	0.0389171	0.028817	0.0326814	0.0549616	0.0267163	0.0181145	0.0564219	0.0320149	0.0343818	0.0285645	0.0379055	0.0426807	0.037732	0.0383149	0.0948756	0.111905	0.0443709	0.0760471	0.0626393	0.0349643	0.0333472	0.0336344	0.0779676	0.0432721	6	0.122449	1	0.0178593	0.00862102	0.00421285	-7.36218e-06	7.36218e-06	0.111905	0.00559447
MosJ 127	Chr 9	112439672	SNV	T	G	EWC	900×WGS		0.0100587	s-4		0.00121016	MosJ 127	0.0144467	0.00672426	0.00741812	0.0151142	0.0534371	0.0249493	0.00186894	0.0402797	0.0220844	0.0141801	0.00472295	0.0181373	0.0505889	0.00893779	0.00739632	0.018117	0.00334211	0.00784185	0.00210836	0.00489303	5.66569e-06	0.0159198	0.015106	0.0188572	0.0036382	0.0155487	0	0	1	0.00897723	0.00308988	0.00246277	1.49936e-05	-1.49936e-05	0.0534371	5.66569e-06
MosJ 128	Chr 10	71603052	SNV	G	A	EWC	900×WGS		0.0107317	v-4		0.00235628	MosJ 128	0.00497886	0.047023	0.0110083	0.00196957	0.0425403	0.039264	0.0183904	0.0935711	0.00532149	0.0237691	0.0068324	0.00232148	0.00868222	0.024602	0.00815235	0.00248643	0.000236464	0.000626959	0.000268111	0.00234175	0.00493021	0.0128491	0.0220786	0.02088	0.0016807	0.0167063	0	0	1	0.0143217	0.00627358	0.00327988	3.40258e-05	-3.40258e-05	0.0935711	0.000236464
MosJ 131	Chr 13	32333391	SNV	C	T	EWC	900×WGS		0.0136437	r-4		0.000681275	MosJ 131	0.0145297	0.0331886	0.040023	0.0174888	0.0299277	0.0210416	0.0519261	0.0318398	0.0233874	0.109219	0.0393802	0.0253328	0.0192229	0.0707476	0.0358423	0.0155459	0.00395212	0.0055486	0.00331246	0.00407441	0.0015975	0.0326771	0.0156078	0.0348294	0.00369702	0.0280615	0	0	1	0.00853686	0.00387537	0.00191722	-0.000117492	0.000117492	0.109219	0.0015975
MosJ 132	Chr 19	19705504	SNV	G	A	EWC	900×WGS		0.0137318	e-6*	Cell position determined by offspring	0.00142412	MosJ 132	0.0120644	0.0140369	0.0158623	0.0092116	0.00415184	0.0144451	0.0331954	0.040807	0.0130927	0.00194944	0.00563586	0.023829	0.0132776	0.0235348	0.0174268	0.031377	0.0032843	0.00803007	0.00346511	0.00448719	0.000410083	0.0187037	0.0177045	0.0172392	0.00393535	0.0143471	0	0	0	0.0112189	0.00473334	0.00304999	0.000105684	-0.000105684	0.040807	0.000410083
														1
Genotyping results of the offspring																																	WGS	WGS	WGS
														Spouse #1	Spouse #2	Spouse #3	F1 of #2	F1 of #2	F1 of #2	F1 of #2	F1 of #2	F1 of #2	F1 of #2	F1 of #2	F1 of #3	F1 of #3	F1 of #3	F1 of #3	F1 of #3	F1 of #3	F1 of #3	F1 of #3	F1 of #1	F1 of #1	F1 of #1	F1 of #1	F1 of #1	F1 of #1	F1 of #1	F1 of #1	F1 of #1	F1 of #1	F1 of #1	F1 of #1	F1 of #1	F1 of #1	F1 of #1	F1 of #1	F1 of #1
	Chr	Pos		REF	ALT		WGS data	VAF in WGS_100×	VAF in WGS_900×merge	Cell position	Note	VAFS in negative control		ConJ 12-0718f1	ConJ 12-0718f2	ConJ 12-0718f3	ConJ 13-1015m1	ConJ 13-1015m2	ConJ 13-1015m3	ConJ 13-1015m4	ConJ 13-1015f1	ConJ 13-1015f2	ConJ 13-1015f3	ConJ 13-1015f4	ConJ 13-1019m1	ConJ 13-1019m2	ConJ 13-1019m3	ConJ 13-1019m4	ConJ 13-1019m5	ConJ 13-1019f1	ConJ 13-1019f2	ConJ 13-1019f3	ConJ 13-1027m1	ConJ 13-1027f1	ConJ 13-1027f2	ConJ 13-1203m1	ConJ 13-1203m2	ConJ 13-1203m3	ConJ 13-1203m4	ConJ 13-1203m5	ConJ 13-1203m6	ConJ 13-1203m7	ConJ 13-1203f1	ConJ 13-1203f2	ConJ 13-1203f3	ConJ 13-1203f4	ConJ 13-0126m1	ConJ 13-0126m2	ConJ 13-0126m3
MosJ 1	Chr 2	30001023	SNV	T	C	EWC	100×WGS	0.0816327	0.0287921	t-2		0.00350371	MosJ 1	0.00224143	0.00522317	0.00307338	0.00322008	0.00345609	0.00349786	0.00364292	0.00345316	0.00332452	0.00290413	0.0036377	0.00337308	0.00359317	0.00340608	0.00380896	0.00382806	0.00373784	0.0037052	0.00332217	0.00372889	0.00349589	0.00341482	0.0017316	0.00300802	0.00140384	0.004329	0.00444586	0.00273889	0.00425039	0.00528026	0.00459167	0.0025344	0.00520472	0.00282725	0.00334076	0.00375
MosJ 2	Chr 3	43180517	SNV	G	A	EWC	100×WGS	0.0531915	0.160177	h-3		0.000384123	MosJ 2	0.00285633	0.000833333	0.000355366	0.000779208	0.00125903	0.000850363	0.000471531	0.000532371	0.495067	0.500342	0.00116156	0.000596659	0.000740476	0.485083	0.496849	0.000787529	0.000758595	0.000739776	0.000608542	0.496666	0.489836	0.503427	0.000301114	0.00119119	0.000396197	0	0.000581058	0.000340948	0.504318	0.499825	0.000587027	0	0.000306279	0.00080819	0.00104312	0.000383436
MosJ 3	Chr 3	44980310	SNV	T	G	EWC	100×WGS	0.0697674	0.031401	g-4		0.000860956	MosJ 3	0.000892061	0.00116686	0	0.000256799	0.000549433	0.000357624	0.000450414	0.000712515	0.000212772	0.000413828	0.000308981	0.000384098	0.000278312	0.000285714	8.1504e-05	0.00030934	0.000445153	0.000185174	0.000320503	0.000160681	0.000147167	0.000452193	0.000803213	0.000828157	0.00164384	0.00220386	0.00115785	0.000457457	0.000973236	0.00196947	0.000395883	0.000457038	0.00167224	0.000741565	0.00140056	0.000547645
MosJ 4	Chr 3	150529800	SNV	C	A	EWC	100×WGS	0.122137	0.133882	a-3		0.000357782	MosJ 4	0.000776398	0.00113122	0.00090009	0.0012758	0.00191378	0.00162978	0.00172439	0.491494	0.00194462	0.00209827	0.506505	0.00221468	0.00183472	0.00206426	0.00173168	0.0012501	0.495773	0.00165502	0.00237718	0.001446	0.00137285	0.00150162	0	0.00197109	0	0.50291	0.000651466	0	0	0.000635728	0.000706714	0.502492	0	0.485618	0	0.00175131
MosJ 5	Chr 3	157542251	SNV	G	A	EWC	100×WGS	0.0806452	0.0426929	u-3		0.000944025	MosJ 5	0.00309704	0.000454959	0.00149087	0.000536222	0.000921083	0.000800491	0.000922398	0.00111432	0.00088752	0.000831627	0.000660663	0.00064707	0.000963653	0.000710033	0.00111146	0.000953533	0.000802904	0.000841462	0.000759035	0.000579939	0.000994601	0.000978474	0.00136612	0.00108932	0.00194742	0.000461681	0	0.000395101	0.00126689	0.000761905	0.00104131	0.000773994	0.490069	0.0022194	0.00120676	0
MosJ 6	Chr 4	28411309	SNV	T	G	EWC	100×WGS	0.0538462	0.040201	u-3		0.000100236	MosJ 6	0.000873935	0.000324149	0.00026469	0.00107997	0.00115114	0.0012279	0.00162523	0.00121902	0.00157291	0.0013739	0.00145505	0.00134293	0.501051	0.00133668	0.00187423	0.00150493	0.00167744	0.00159708	0.00175797	0.00141007	0.00136881	0.00129185	0	0	0	0.000309215	0	0.000260417	0.00026295	0	0	0	0.000673703	0	0	0
MosJ 7	Chr 5	25452510	SNV	A	G	EWC	100×WGS	0.240741	0.134648	a-3		0.00235954	MosJ 7	0.00143021	0.00229008	0.0042153	0.00245516	0.00228976	0.00225862	0.00290926	0.498685	0.00241731	0.00255411	0.499924	0.00254075	0.0021003	0.00242195	0.00258347	0.49264	0.502222	0.00272329	0.0024963	0.00223385	0.00235501	0.00226089	0.00230282	0.000878735	0.00323494	0.00380952	0.0022618	0.00446999	0.00383543	0.00238095	0.00140174	0.00192864	0.0021348	0.0020555	0.0016852	0.513816
MosJ 8	Chr 5	38864983	SNV	A	T	EWC	100×WGS	0.11236	0.041129	t-2		0.000605111	MosJ 8	0.000123274	0.00175243	0.0015013	0.00141569	0.00161747	0.00169253	0.00137115	0.00162543	0.00135022	0.00141529	0.00165597	0.0012148	0.00160374	0.00161447	0.00168129	0.00148706	0.00141984	0.000977463	0.00125746	0.00140772	0.0015617	0.00122095	0.00030525	0.000881834	0.00136906	0.000589855	0.0015873	0.000499833	0.000965437	0.00034459	0.000586596	0.000711617	0.000528634	0.000550737	0	0.000308928
MosJ 9	Chr 5	61696521	SNV	G	C	EWC	100×WGS	0.288462	0.146552	a-3		5.58005e-05	MosJ 9	0	0.000359066	0	0.000142642	0.00012946	0.00014964	0.000154445	0.000239785	0.000187029	0.000163655	0.506725	0.00033706	0.000158822	0.000191042	0.000234432	0.000256406	0.000165171	4.72936e-05	0.000314621	0.000168269	0.000115256	0.000332512	0	0	0.00105485	0.000346141	0	0	0	0.00185014	0.000240848	0.48462	0	0.000677507	0.000290276	0
MosJ 10	Chr 5	118040448	SNV	T	G	EWC	100×WGS	0.278689	0.131993	a-3		0.000383068	MosJ 10	0.000436491	0	0.000489237	0.000707483	0.000698348	0.000663387	0.000640369	0.00102125	0.000733779	0.000751803	0.512237	0.000910701	0.000657947	0.000892565	0.000801397	0.000421512	0.000887277	0.000816567	0.000869484	0.000674328	0.0011071	0.000676748	0.000413394	0	0.000578704	0.000538793	0	0.000470146	0	0.000993542	0.000404367	0.482494	0.00090212	0.491228	0.000483559	0.492491
MosJ 11	Chr 6	32459090	SNV	C	G	EWC	100×WGS	0.292929	0.300086	a-2		0.000191608	MosJ 11	0.00127119	0.000619579	0.000956251	0.000458029	0.00063505	0.000829844	0.000609841	0.000574163	0.000705741	0.496039	0.000640904	0.000387258	0.000516989	0.504763	0.000631818	0.00062701	0.000585366	0.000471601	0.00042378	0.000686278	0.000619371	0.507673	0.496131	0.52171	0.000316056	0	0.000436872	0.00158772	0.000759109	0.00100025	0.00152905	0.48528	0.00023753	0.505269	0	0.500566
MosJ 12	Chr 6	51631763	SNV	T	C	EWC	100×WGS	0.184211	0.174603	u-1		0.00462003	MosJ 12	0.00565971	0.00565611	0.00297114	0.00432449	0.00437233	0.00387175	0.00512223	0.00481892	0.00451696	0.00511493	0.00443638	0.495926	0.505461	0.00475748	0.00389135	0.00390061	0.00464842	0.00510871	0.00540822	0.0038921	0.00450134	0.00420397	0.00186498	0.00635818	0.527224	0.00338655	0.00879662	0.00730994	0.00342319	0.00443262	0.00338409	0.00719424	0.496632	0.00348874	0.496445	0.00300903
MosJ 13	Chr 6	132883301	SNV	T	C	EWC	100×WGS	0.0727273	0.0269841	t-2		0.00397567	MosJ 13	0.0033428	0.00280805	0.00359863	0.00376514	0.00333908	0.00393342	0.00321127	0.00412703	0.00363882	0.00363434	0.00398699	0.00277254	0.00408726	0.00286428	0.00319938	0.00313808	0.00279511	0.00311033	0.00354792	0.00322297	0.00318073	0.00308081	0.00312586	0.00345531	0.00325821	0.00361216	0.00398514	0.00333253	0.00236926	0.00406957	0.00335556	0.00320921	0.0029739	0.00459901	0.00386901	0.00349942
MosJ 15	Chr 8	60387990	SNV	G	C	EWC	100×WGS	0.102041	0.0638468	u-2		0.0012005	MosJ 15	0.000495393	0.000223115	0.000273573	0	0	0.00110798	0.000271321	9.74944e-05	0.000120904	0.000226912	0.000236155	0.000251351	0.514315	0.000976668	0	0.000102838	0.00035482	0.000124549	0	0.000627409	0.000745712	0.000644468	0.00032338	0.000521241	0.00159377	0.000274977	0	0.00071582	0.000275028	0.000331675	0.0002731	0.000534131	0.481171	0.000248973	0.000244349	0
MosJ 17	Chr 10	72899626	SNV	C	A	EWC	100×WGS	0.0720721	0.133731	h-3		0.000638424	MosJ 17	0.00197628	0.000710985	0.00222593	0.000384295	0.00116634	0.000836931	0.499399	0.000440281	0.000704126	0.000551572	0.00042718	0.000138414	0.000147396	0.515999	0.505833	0.000944805	0.000392025	0.000491654	0.000460691	0.000465865	0.514445	0.498429	0.48652	0.512138	0.000718391	0.000657678	0.00125376	0.00208457	0.000904704	0.0014455	0.000960154	0.00163132	0.00208768	0.00223714	0.00116347	0.00134003
MosJ 18	Chr 10	74493454	SNV	C	T	EWC	100×WGS	0.0727273	0.027193	g-4		0.00340731	MosJ 18	0.00129534	0.0026621	0.00272131	0.00306395	0.00244149	0.00232771	0.00302803	0.00269574	0.002821	0.00286688	0.00283494	0.0028115	0.00328248	0.00250169	0.00269814	0.00229468	0.00259375	0.0027081	0.00268791	0.00294837	0.00286488	0.00347458	0.00397219	0.00193969	0.000912617	0.00247915	0.00208	0.002331	0.00318945	0.00255895	0.00338802	0.00218167	0.00431844	0.00235553	0.00296296	0.00312787
MosJ 20	Chr 11	13758835	SNV	G	A	EWC	100×WGS	0.152174	0.0724638	u-2		0.00119063	MosJ 20	0.00261487	0.00109649	0.00123967	0.00149015	0.000878775	0.00111667	0.000821789	0.00100434	0.0015071	0.00161466	0.00135462	0.00119959	0.00127098	0.00124493	0.00121731	0.00117651	0.00132107	0.00142579	0.00116299	0.00129593	0.00113888	0.00124493	0.00289137	0.000390625	0.00318979	0.0035824	0.00278649	0.00267023	0.0012087	0.003772	0.000722804	0.00264201	0.508271	0.00278455	0.000463177	0.0020377
MosJ 23	Chr 11	118789688	SNV	C	T	EWC	100×WGS	0.111111	0.0994764	a-4		0.0013238	MosJ 23	0.000779221	0.00148865	0.00250705	0.0014839	0.00160418	0.0009787	0.0013368	0.498833	0.00160587	0.0011732	0.490497	0.0011323	0.00149936	0.00110762	0.00112211	0.498598	0.00131674	0.000921685	0.00157415	0.00104424	0.00146641	0.00125196	0.000304971	0.000881057	0.000788333	0.495903	0.0027027	0.000329924	0.00171057	0.000654022	0.00143184	0.494845	0.00154036	0.00130107	0.000354988	0.492409
MosJ 25	Chr 13	9843606	SNV	C	T	EWC	100×WGS	0.178082	0.130601	a-3		0.000624523	MosJ 25	0.00110284	0.00181159	0.00113604	0.000648033	0.00091612	0.000993641	0.000794211	0.511452	0.000717875	0.000541467	0.506123	0.00112432	0.000577717	0.00142106	0.000659839	0.000856187	0.00102949	0.000953084	0.000659478	0.00105206	0.000631214	0.000826848	0.000309693	0.000638162	0.000439367	0.517199	0.000625195	0	0	0.000952079	0.000962773	0.494232	0.00147984	0.503399	0.000404204	0.533079
MosJ 27	Chr 13	41601495	SNV	G	A	EWC	100×WGS	0.333333	0.31533	a-1		0.000785634	MosJ 27	0.00275229	0	0.00093985	0.00112423	0.000807465	0.493712	0.509124	0.000956605	0.000534795	0.495525	0.00115566	0.000842405	0.000519953	0.492839	0.504565	0.5039	0.000884782	0.00101019	0.00122424	0.000809127	0.479144	0.481613	0.540453	0.502003	0	0.00119332	0	0	0.00166667	0.500355	0.00155159	0	0.00185701	0.00175285	0.00117233	0.00093985
MosJ 28	Chr 13	52744135	SNV	G	A	EWC	100×WGS	0.0789474	0.137304	x-2		0.00116678	MosJ 28	0.000583431	0.000586281	0.000159668	0.00142519	0.510383	0.00112443	0.000889326	0.000914334	0.00128364	0.00129728	0.00146821	0.499715	0.00131418	0.00159041	0.000998261	0.00126954	0.00121731	0.495377	0.00141183	0.000928314	0.00202821	0.00169899	0.000690846	0.000893815	0.509443	0.00211566	0.50904	0.00234467	0.00128921	0.00143421	0.514613	0.0012513	0.00214844	0.00174603	0.00171748	0.00199131
MosJ 30	Chr 14	96805436	SNV	G	A	EWC	100×WGS	0.11236	0.061008	u-2		0.0006035	MosJ 30	0.00145525	0.00102145	0.000825309	0.00136564	0.00151896	0.000976706	0.00146495	0.000880766	0.00127306	0.00113625	0.00149896	0.00132366	0.496828	0.00173811	0.00124509	0.00096	0.0012601	0.00118748	0.00106485	0.00109534	0.00108491	0.000882423	0.00133869	0.00187116	0.00108735	0.000369822	0.000512295	0.00214527	0.000331895	0	0.00206132	0.000925069	0.000893123	0.000959233	0.000329164	0.000315159
MosJ 33	Chr 17	29033738	SNV	A	T	EWC	100×WGS	0.118812	0.109076	x-2		0.000380066	MosJ 33	0.000365497	0	0.000377216	0.00024604	0.502914	0.000616595	0.000605468	0.000630627	0.000493854	0.000509096	0.000433683	0.496855	0.000333621	0.000290998	0.000506782	0.000356742	0.000206834	0.503701	0.500411	0.000315159	0.000827109	0.000381098	0	0.000727537	0.000445831	0.000489716	0.00139567	0	0.000857265	0.000401768	0.485762	0.000399042	0.000334672	0.000577868	0.513964	0.000861326
MosJ 34	Chr 18	31002810	SNV	A	G	EWC	100×WGS	0.0530973	0.0269627	t-2		0.00441334	MosJ 34	0.00627907	0.00391389	0.00381485	0.00425998	0.00408518	0.00460351	0.00468019	0.00402517	0.0045777	0.00479408	0.00455872	0.00501627	0.00458413	0.00472218	0.00425296	0.00445612	0.00479027	0.00442282	0.00445238	0.00422891	0.00405238	0.0042735	0.00425532	0.00556715	0.00412961	0.00377121	0.00426296	0.00321285	0.00654843	0.0027659	0.00281996	0.00431144	0.00392349	0.00431965	0.00617111	0.00831537
MosJ 35	Chr 19	7495976	SNV	G	C	EWC	100×WGS	0.15493	0.136322	a-3		4.74586e-05	MosJ 35	0.00030722	0.00038835	0.000669344	0.000125467	9.21008e-05	0.000273021	0.000111753	0.000288992	0.000116141	0.000135685	6.30915e-05	0.000205334	9.72763e-05	5.38126e-05	0.000280448	0.498082	0.00017322	0.000166293	0.000115986	0.000122714	6.4778e-05	0.00023754	0	0	0.000430663	0.495602	0	0	0.000385208	0.00190114	0.000337838	0.502311	0.000711997	0.502526	0.000738825	0.508281
MosJ 37	Chr 4	115039628	indel	TC	T	EWC	100×WGS	0.207921	0.178727	u-1	indel	0.000159426	MosJ 37	0.00159617	0.000276472	0.000220897	0.000341899	0.492013	0.000225806	0.000400435	0.000133227	0.000294242	0.000100333	0.000271143	0.500489	0.000184437	0.000383296	0.000116618	0.000134841	0.000197341	0.000170177	0.00027557	0.000265695	0.000961169	0.000288885	0.000222816	0.00045403	0.000304507	0	0.000222668	0.00126167	0.00051573	0.000237869	0.507124	0.000788436	0.488389	0.000202265	0.500676	0.000505945
MosJ 38	Chr 5	60254092	indel	AT	A	EWC	100×WGS	0.0891089	0.0232342	t-2	indel, High VAF in negative control	0.0305512	MosJ 38	0.0345598	0.0332767	0.0321137	0.0299042	0.0312722	0.0295393	0.0302492	0.0292977	0.0304502	0.0301399	0.0309264	0.0294789	0.0304853	0.029238	0.0313055	0.0298231	0.0286884	0.0294821	0.0298217	0.0292233	0.0296358	0.0293419	0.0298812	0.0320235	0.0317836	0.0302401	0.0330637	0.0292195	0.0319171	0.030922	0.0318051	0.0324242	0.0306886	0.0295607	0.0324435	0.0328045
MosJ 40	Chr 6	101850462	indel	GA	G	EWC	100×WGS	0.0860215	0.0658579	a-5	indel	6.23675e-05	MosJ 40	0	0	0	5.37302e-05	0.000130809	0.000106998	0.000166959	0.5019	7.81942e-05	0.000130179	0.000104232	7.20617e-05	5.26385e-05	0.000169871	2.74236e-05	0.000140157	0.509387	0.000271501	0.000476105	8.17082e-05	4.70079e-05	0	0	0	0	0.491745	0.000635122	0	0.000392465	0.000731529	0	0.000749064	0.000343879	0.503886	0.000382555	0
MosJ 42	Chr 11	17786233	indel	TTA	T	EWC	100×WGS	0.271186	0.205525	u-1*	indel, High VAF in negative control, cell position was manually determined	0.174736	MosJ 42	0.0469001	0.082215	-0.00147824	0.0205138	0.478359	0.00616953	0	0.00381427	0.0108152	0.0160917	0.00538827	0.0150568	0.0202742	0.00400411	0.0161478	0.0155756	0.000109236	0.0133458	0.466014	0.010121	0.0150857	0.0211917	0.00734979	0.033969	0.0113287	0.0124345	0.0628162	0.0397681	-0.0134446	0.0432412	0.0307627	0.0151243	0.492659	0.0355319	0.470213	0.02081
MosJ 45	Chr 15	69937436	indel	AT	A	EWC	100×WGS	0.0864198	0.0334317	e-3	indel, High VAF in negative control	0.0262714	MosJ 45	0.0285237	0.0285476	0.0209445	0.0264994	0.0248988	0.0258476	0.0248757	0.0257404	0.0237807	0.0257261	0.0250948	0.0257833	0.0245658	0.0267496	0.0269284	0.0232147	0.0253852	0.0259369	0.0247989	0.0255315	0.0245474	0.0252253	0.027372	0.0263852	0.0210526	0.0198633	0.0282499	0.0303417	0.0239847	0.0247355	0.0297185	0.0270157	0.0241676	0.0296203	0.0237769	0.0247209
MosJ 53	Chr 9	12444215	SNV	C	T	noEWC	100×WGS	0.0421053	0.104357	x-2		0.00179022	MosJ 53	0.00197859	0.00149619	0.00189934	0.00218454	0.0021254	0.00246164	0.00185851	0.00255366	0.00196972	0.00188308	0.00264046	0.00138284	0.00149306	0.00260004	0.0021725	0.00203965	0.00140573	0.499739	0.00128255	0.00213513	0.00348491	0.0031902	0.00176757	0.00271719	0.480868	0.00340611	0.511176	0.00221055	0.00149274	0.00241094	0.00210672	0.00121704	0.00169666	0.00278712	0.00140364	0.00174397
MosJ 55	Chr 9	75750049	SNV	T	C	noEWC	100×WGS	0.0588235	0.0590015	a-5	High VAF in negative control	0.0122635	MosJ 55	0.0302505	0.0293086	0.0312789	0.032174	0.0302024	0.031479	0.0291204	0.029465	0.0283409	0.0292896	0.479506	0.0339075	0.0316723	0.0326494	0.028157	0.0325422	0.489771	0.033139	0.0282602	0.0310918	0.0315296	0.0297306	0.0278966	0.0310236	0.0342672	0.0305993	0.0291745	0.0330861	0.0289689	0.0291254	0.0330684	0.0303233	0.0299047	0.0332277	0.0311311	0.47347
MosJ 56	Chr 10	106639317	SNV	C	G	noEWC	100×WGS	0.0727273	0.135569	h-3		4.78973e-05	MosJ 56	5.21866e-05	0	0	4.9445e-05	0.000120555	0.499438	0.477795	0	0.000691526	7.21709e-05	0	0.000156807	4.86287e-05	0.495713	0.488502	0.00066277	0	0.000330954	0.00012721	0	0.50092	0.000226881	0.505957	0.503774	0.000995867	7.70475e-05	5.57134e-05	0.000157903	0.000297141	0.000254001	0.000258543	0.000434216	0.000118549	0.000593824	0.000742322	0.00012622
MosJ 58	Chr 15	52878947	SNV	T	G	noEWC	100×WGS	0.0588235	0.0341297	e-5		0.00204029	MosJ 58	0.00793517	0.00411692	0.00372881	0.00602991	0.00917431	0.0159983	0.00496141	0.00494438	0.00583158	0.00400534	0.00673098	0.00750605	0.0159198	0.00451031	0.00542299	0.00597848	0.00476417	0.00797373	0.00584698	0.00789622	0.0105426	0.00454635	0.0090999	0.0135089	0.0213478	0.00410748	0.00694444	0.00365334	0.00689953	0.00378	0.00696992	0.00452954	0.00350304	0.00590344	0.00500626	0.0077821
MosJ 59_div2	Chr X	122693584	SNV	A	C	noEWC	100×WGS	0.0545455		ND		0.000573862	MosJ 59_div2	0.000952381	0.00128158	0.000851209	0.00110213	0.00183352	0.000712504	0.00104932	0.000628733	0.000475624	0.000844773	0.00139888	0.000348554	0.000620155	0.000741565	0.000674309	0.00106686	0.00127389	0.000691404	0.000494315	0.000763553	0.0016247	0.00117994	0.00100334	0.000866551	0.00162602	0.000273149	0.000668896	0.00144342	0.000638774	0.00140959	0.00146145	0.00150602	0.00138972	0.000302206	0.00131406	0.000693963
MosJ 66	Chr 2	65276098	SNV	G	A	EWC	900×WGS		0.0213493	x-6		0.00118141	MosJ 66	0.00100967	0.000963878	0.000959889	0.000697709	0.000964608	0.000927327	0.00105712	0.00082713	0.000843351	0.00109613	0.000811969	0.00136847	0.00164612	0.000878996	0.00144763	0.000963502	0.000799227	0.000949435	0.000782312	0.00111383	0.000819121	0.000865196	0.00116271	0.000888362	0.000994851	0.00101171	0.000932776	0.000975262	0.00142014	0.000961831	0.00101159	0.000936763	0.00121486	0.0012798	0.00108216	0.000948195
MosJ 67	Chr 12	10106637	SNV	G	C	EWC	900×WGS		0.0218447	a-7		0.000549453	MosJ 67	0.000227052	0.000406924	0.000348701	0.000157452	0.000207887	0.00033705	0.000504721	0.000313543	0.00025547	0.000388243	0.000207892	0.000321994	0.000246399	0.000369217	0.000328172	0.503905	0.000628332	0.000614758	0.000312033	0.000344875	0.000237027	0.000337676	0.000690306	0.000313421	0.000209932	0.000315066	0.000321158	0.000379699	0.000268614	0.000307926	0.000179916	0.000590809	0.000541555	0.500395	0.000249571	0.00050809
MosJ 68	Chr 18	27437337	SNV	T	A	EWC	900×WGS		0.0229592	g-4		0.000136949	MosJ 68	0.000235897	0.000269504	0.000219294	0.000299863	0.000302989	0.000221508	0.000402826	0.000309601	0.000306552	0.000377847	0.000372413	0.000255928	0.000279683	0.000308876	0.000294078	0.000345568	0.000236117	0.000209159	0.000297815	0.000328971	0.000271838	0.000227878	0.000226485	0.000354858	0.000376562	0.000421452	0.000355368	0.000360282	0.000371546	0.000206938	0.000149018	0.000219693	0.00028896	0.000328743	0.000255003	0.000360124
MosJ 70	Chr 15	39038162	SNV	T	A	EWC	900×WGS		0.0255387	r-3		0.000597086	MosJ 70	0.000631922	0.000619353	0.000476269	0.000602376	0.000640645	0.000632995	0.000456974	0.000469393	0.000550327	0.000538341	0.000881803	0.00054259	0.000411961	0.000550527	0.00035335	0.000428919	0.000447011	0.000512881	0.000448758	0.00077621	0.000496605	0.000421741	0.000720392	0.000774545	0.000462365	0.000518116	0.00072755	0.000687479	0.000573304	0.000535192	0.000652939	0.000568138	0.000636137	0.000549509	0.000514841	0.000721072
MosJ 71	Chr 5	127791331	SNV	G	A	EWC	900×WGS		0.0257611	o-6		0.00108514	MosJ 71	0.000911496	0.000978807	0.000920687	0.00116099	0.000740766	0.000846049	0.000901555	0.000978119	0.492495	0.000995201	0.00118582	0.0009674	0.000988421	0.000953977	0.000879865	0.000928997	0.00112505	0.000922258	0.000830098	0.00076032	0.00100913	0.000795348	0.00102086	0.00090068	0.000964726	0.000905983	0.000923648	0.00095225	0.000865564	0.000972763	0.00105083	0.00082328	0.000956522	0.000969365	0.000761651	0.000839457
MosJ 72	Chr 6	138556245	SNV	A	T	EWC	900×WGS		0.0260138	o-6		0.000353171	MosJ 72	0.000604204	0.000544788	0.000420797	0.000521317	0.000469412	0.00040505	0.00054108	0.000423981	0.000466096	0.000629435	0.000483268	0.000489863	0.000496461	0.000664438	0.000581663	0.000670286	0.00049146	0.000597284	0.000394523	0.000524404	0.000456191	0.000458021	0.0004361	0.000379534	0.000504644	0.00039725	0.000538657	0.000436028	0.000393296	0.000529592	0.000446307	0.00080169	0.000568743	0.000405638	0.000473518	0.000690199
MosJ 73	Chr 12	24393082	SNV	G	A	EWC	900×WGS		0.026738	h-9*	Cell position determined by offspring	0.00105607	MosJ 73	0.00139816	0.00132458	0.00117162	0.0015259	0.00107283	0.00137368	0.00136258	0.00135263	0.00129024	0.00127156	0.00123137	0.00129877	0.00132816	0.001366	0.495724	0.00169603	0.00124587	0.00135143	0.00133404	0.00140366	0.00103241	0.00116207	0.00136944	0.00120119	0.00139741	0.00132319	0.00120506	0.00125615	0.00131983	0.506327	0.0013221	0.00182267	0.00124175	0.00129281	0.00111093	0.00124202
MosJ 74	Chr 1	11382055	SNV	G	C	EWC	900×WGS		0.0270701	d-6		0.000846299	MosJ 74	0.000136515	0.000145046	0.000153559	0.000205897	0.000193235	0.000146568	0.000151833	0.000260981	0.000170895	0.000139916	0.000147889	0.00013553	0.000147378	0.00019521	0.000157669	0.000215568	0.000203266	0.000154979	0.00012439	0.000197531	0.000315544	0.000174395	0.000116383	0.000197346	0.000217943	8.08146e-05	0.00015215	0.000144287	0.000206487	0.000130501	0.000174392	0.000189494	0.00027744	0.00017608	0.000205311	0.000108223
MosJ 75	Chr 4	43528155	SNV	C	T	EWC	900×WGS		0.0303929	o-5		0.00160576	MosJ 75	0.00185408	0.0016486	0.00190301	0.00162742	0.00176319	0.00185866	0.00226374	0.00138928	0.00185255	0.00179885	0.00231142	0.00169414	0.00167266	0.00136808	0.00192562	0.00168417	0.00190204	0.00154536	0.0018848	0.0018987	0.00142912	0.00140098	0.0016083	0.00150731	0.00144966	0.00159498	0.00172997	0.00184249	0.00213588	0.00135861	0.00156578	0.00152584	0.0015875	0.00155141	0.00141411	0.0016971
MosJ 76	Chr 13	84930481	SNV	G	A	EWC	900×WGS		0.0549915	x-4		0.00120192	MosJ 76	0.00157684	0.00116585	0.000745792	0.0012381	0.469105	0.00117961	0.00130182	0.00134045	0.00142262	0.000975674	0.00128617	0.460332	0.00093045	0.00112341	0.00138355	0.00138146	0.00134447	0.497125	0.00103222	0.00136607	0.00120134	0.00112643	0.00176211	0.00125041	0.0012484	0.00119424	0.468583	0.00181713	0.0012162	0.00127111	0.473799	0.00139865	0.00113042	0.0018041	0.00111387	0.000848677
MosJ 77	Chr 18	86920934	SNV	T	A	EWC	900×WGS		0.0554675	h-7		0.000469011	MosJ 77	0.000301483	0.000192198	0.0003724	0.000444937	0.000365478	0.497259	0.000353907	0.000304124	0.000310241	0.000386736	0.000281187	0.000232722	0.000352505	0.000228542	0.00033716	0.000335186	0.000283977	0.000374677	0.000231946	0.000274968	0.503448	0.000568376	0.000386123	0.000247459	0.000213341	0.000259446	0.00029943	0.000233981	0.00048109	0.000264974	0.000305421	0.000262904	0.00032808	0.00037237	0.000345399	0.000270242
MosJ 78_div2	Chr X	115773248	SNV	C	A	EWC	900×WGS		0.0807249	x-5		0.000105128	MosJ 78_div2	0.000160382	0.000186834	0.000125305	0.000229877	0.000398375	0.00013077	0.000220057	0.000215481	0.000157428	0.000354907	0.00023966	0.000306528	0.00016665	0.000162465	0.000527391	0.000216169	0.000129874	0.000173936	0.000200277	0.000210803	0.000300544	0.000276311	0.000251808	0.000172201	0.000148981	0.000246409	0.000210557	0.000148936	0.000260965	0.000307528	0.496382	0.000179406	0.000361328	0.000161421	0.000216263	0.000160586
MosJ 79	Chr 4	113727133	SNV	A	G	EWC	900×WGS		0.08285	x-3		0.0034546	MosJ 79	0.00313815	0.00305895	0.00295503	0.00317856	0.00286842	0.0031197	0.00286436	0.00318879	0.00318272	0.00321426	0.00298621	0.0029785	0.0031848	0.00301278	0.00275254	0.00278225	0.00276453	0.501545	0.496128	0.00315914	0.00330077	0.00283788	0.00301482	0.00287237	0.507153	0.00385681	0.485088	0.00336039	0.00264619	0.00288481	0.00305704	0.00292838	0.00278431	0.00299687	0.00309111	0.00307232
MosJ 80	Chr 7	33525242	SNV	T	G	EWC	900×WGS		0.0840787	x-3		0.00274019	MosJ 80	0.00321777	0.00287159	0.00331507	0.00278804	0.00200592	0.00328801	0.00311343	0.00390052	0.00280251	0.00270705	0.00277316	0.493278	0.00348644	0.0032282	0.00281509	0.00327532	0.00311792	0.00211256	0.504152	0.00312565	0.00289469	0.00254821	0.00371385	0.00357435	0.491517	0.00268061	0.518127	0.00349243	0.00386889	0.00305782	0.00303929	0.00339774	0.00303889	0.00279448	0.00370399	0.00321306
MosJ 81	Chr 1	30848799	SNV	G	A	EWC	900×WGS		0.0869925	x-3		0.00126796	MosJ 81	0.00118423	0.000953847	0.00110999	0.00102886	0.00104686	0.00119272	0.00115282	0.00111346	0.00144526	0.000983247	0.0010334	0.000882319	0.00102241	0.00105646	0.00133165	0.00107762	0.00112381	0.492743	0.488574	0.00106945	0.000995423	0.0011699	0.00119916	0.000981564	0.510876	0.0016355	0.000992786	0.000837743	0.000972908	0.000929787	0.483976	0.000988988	0.00117578	0.00157493	0.00162442	0.00133655
MosJ 82	Chr 1	184095585	SNV	A	C	EWC	900×WGS		0.0883503	x-3		0.00191878	MosJ 82	0.0021479	0.00206103	0.00216139	0.00191331	0.482674	0.00211892	0.00261861	0.00217005	0.00197923	0.00186102	0.00206199	0.498404	0.00220752	0.00201884	0.00235314	0.0022518	0.00195901	0.489828	0.498606	0.00201142	0.00230647	0.00204115	0.00241998	0.00229289	0.00201833	0.00194424	0.492697	0.00239085	0.00219401	0.00231114	0.494317	0.00210191	0.00216424	0.00227554	0.493668	0.00201413
MosJ 83	Chr 11	42650505	SNV	C	G	EWC	900×WGS		0.0963455	h-6		0.000694282	MosJ 83	0.000171462	0.000614145	0.000305551	0.000356619	0.00019868	0.000181882	0.000112224	0.000285839	0.000301868	0.000247506	0.000132637	0.000548798	0.000585605	0.501827	0.500243	0.000389997	0.000712797	0.00033061	0.000460662	0.494301	0.490522	0.000160158	0.000176155	0.49474	0.00072555	0.000362992	0.000232216	0.495597	0.498711	0.486899	0.000520775	0.000285373	0.000359352	0.000388062	0.000524313	0.000622051
MosJ 84	Chr 5	116653758	SNV	C	T	EWC	900×WGS		0.134303	h-4		0.00113202	MosJ 84	0.00846024	0.00516652	0.00402947	0.00545812	0.0116402	0.00967043	0.470246	0.00452951	0.481447	0.484891	0.00829802	0.00634361	0.0125968	0.489039	0.462528	0.00690207	0.00460218	0.00582131	0.00706585	0.485063	0.479809	0.00671697	0.00690468	0.479167	0.00941465	0.00469369	0.00567031	0.00367691	0.478904	0.4731	0.0069698	0.00582591	0.00681431	0.00432059	0.00643734	0.00730717
MosJ 85	Chr 13	23581720	SNV	G	A	EWC	900×WGS		0.1425	h-3		0.00185137	MosJ 85	0.00179131	0.00177673	0.00182032	0.00182283	0.00185608	0.501901	0.502344	0.00177315	0.00170827	0.486934	0.00200984	0.00185247	0.00176265	0.501106	0.497926	0.00203913	0.00183192	0.00202958	0.00206525	0.00171571	0.482581	0.497858	0.495728	0.497789	0.00189982	0.00195381	0.0018872	0.0016977	0.0017795	0.5002	0.0021472	0.00187018	0.0016385	0.00173041	0.00209644	0.00218831
MosJ 86	Chr 19	17429587	SNV	C	T	noEWC	900×WGS		0.020219	ND		0.000946242	MosJ 86	0.000904709	0.00106262	0.00108687	0.00131178	0.000760668	0.000973973	0.000972435	0.0010564	0.00100147	0.0011726	0.000952895	0.00105616	0.00150477	0.000884917	0.00128146	0.00110517	0.00111375	0.000892826	0.000817584	0.00105256	0.000903446	0.00138272	0.00098517	0.000825115	0.00122665	0.00097648	0.000884632	0.00118306	0.0010244	0.000807957	0.000737496	0.00104601	0.00121681	0.00118867	0.00108123	0.000816631
MosJ 87	Chr 2	30751634	SNV	C	T	noEWC	900×WGS		0.0230608	o-6		0.00107168	MosJ 87	0.000849518	0.000952381	0.0012514	0.00109884	0.00120275	0.000846544	0.000919456	0.00130237	0.495578	0.0010024	0.000791582	0.000708911	0.0010273	0.00102502	0.000947075	0.000909795	0.0011391	0.000964221	0.000831166	0.00101764	0.00101531	0.00126538	0.000881684	0.00127811	0.00113712	0.000898698	0.000805434	0.00102403	0.00052063	0.00111957	0.00108464	0.000962541	0.000721129	0.000861958	0.00107872	0.000901892
MosJ 88	Chr 13	92160294	SNV	C	T	noEWC	900×WGS		0.0259615	e-3		0.00042327	MosJ 88	0.000418025	0.000610058	0.000433542	0.000427346	0.000610078	0.000434827	0.00020966	0.000347818	0.000311778	0.000689163	0.00038773	0.000397767	0.000468849	0.000496508	0.000289354	0.000397088	0.000510442	0.000480273	0.000579592	0.000263653	0.000423458	0.000716222	0.000550284	0.0004935	0.000711801	0.000338293	0.000396543	0.00026458	0.000534469	0.000559894	0.00040866	0.000387449	0.000392176	0.000428136	0.000413763	0.000476984
MosJ 90	Chr 3	118238695	SNV	C	A	noEWC	900×WGS		0.0299625	a-8		0.000389765	MosJ 90	0.000768275	0.000922834	0.000901182	0.00086666	0.000790803	0.000505174	0.00092442	0.00070983	0.000739098	0.000604261	0.000787228	0.000868193	0.000699335	0.000865657	0.000833222	0.497617	0.000989324	0.000695065	0.000568027	0.00073689	0.000784434	0.000679492	0.000839499	0.000817056	0.00066769	0.000856285	0.00070194	0.000828638	0.00098651	0.000899474	0.00104021	0.000998413	0.000721132	0.000729256	0.000761286	0.000926923
MosJ 91	Chr 7	14728786	SNV	C	T	noEWC	900×WGS		0.0303644	h-8		0.00116807	MosJ 91	0.00118146	0.0010947	0.00110999	0.00113836	0.00115458	0.483767	0.00160227	0.00107723	0.00105228	0.00130067	0.00109442	0.00199203	0.00104094	0.00131246	0.48818	0.00174744	0.0012388	0.000937577	0.00111414	0.0012481	0.499643	0.00104349	0.00111221	0.00136932	0.00109421	0.00131157	0.00111074	0.000832136	0.00141842	0.503678	0.0014005	0.0013367	0.00168502	0.00113261	0.00111872	0.00129481
MosJ 92	Chr 6	123248662	SNV	G	A	noEWC	900×WGS		0.0444856	x-4		0.00189688	MosJ 92	0.00166314	0.0017657	0.0020066	0.00180344	0.00219915	0.00198663	0.0019739	0.00171664	0.00196877	0.00181875	0.00183906	0.00173901	0.0019889	0.00174838	0.00231635	0.00188401	0.00189376	0.498738	0.00189456	0.0019494	0.00181497	0.00152568	0.0019983	0.00184269	0.00182416	0.00188828	0.496422	0.00152207	0.0020214	0.00220314	0.00176737	0.00222889	0.00191738	0.00206945	0.002024	0.00193649
MosJ 93	Chr 14	122761461	SNV	A	T	EWC	900×WGS		0.0155483	ND		9.00355e-05	MosJ 93	0.000117607	6.59348e-05	7.10406e-05	6.81225e-05	2.87402e-05	8.09385e-05	0.000101855	7.31434e-05	0.000107039	8.81698e-05	5.47638e-05	8.83173e-05	9.48323e-05	5.55991e-05	8.11017e-05	0.000112037	7.95137e-05	8.0701e-05	4.78097e-05	9.74254e-05	8.2609e-05	0.000122999	8.64015e-05	5.63543e-05	8.06915e-05	5.86625e-05	7.13665e-05	8.08381e-05	0.000163736	0.000129467	8.48199e-05	4.78641e-05	7.22222e-05	6.88054e-05	6.99503e-05	9.30793e-05
MosJ 94	Chr 5	57520799	SNV	T	A	EWC	900×WGS		0.0139116	e-4*	Cell position determined by offspring	0.000117602	MosJ 94	0.000175677	0.000115893	0.000199551	0.000213105	0.000136176	0.000178129	0.000175894	0.000160923	0.000124331	0.000121765	0.000141388	0.000144343	9.09885e-05	0.000138501	0.000214557	0.000179884	0.000128642	0.0001219	0.000128121	0.000165992	0.000182033	0.000231122	0.000227969	0.000170803	0.000170112	0.000186429	0.000193497	0.000159334	0.000157168	8.60935e-05	0.000135982	0.00022786	0.000263932	5.39804e-05	0.000145591	0.000198578
MosJ 95_div2	Chr X	79491580	SNV	A	C	EWC	900×WGS		0.0176991	ND		0.000164411	MosJ 95_div2	0.000528422	0.000553881	0.000398229	0.000595282	0.000642069	0.000418913	0.000540005	0.000686838	0.000484735	0.000585593	0.000541321	0.000456194	0.000763734	0.000320318	0.000430505	0.00046961	0.000464041	0.000427042	0.000316973	0.000559045	0.000633037	0.000435642	0.000490464	0.000604801	0.000471405	0.00055821	0.000419007	0.000530265	0.000352729	0.000498684	0.000399202	0.000548686	0.000515296	0.000478114	0.000471439	0.000603603
MosJ 96	Chr 6	61292895	SNV	G	A	EWC	900×WGS		0.0165138	v-3		0.00194742	MosJ 96	0.00185285	0.00185911	0.00191015	0.00200621	0.00186071	0.00173868	0.00167341	0.00212195	0.00194559	0.00179892	0.00190788	0.00174301	0.00194353	0.00147265	0.00193428	0.00185252	0.00185234	0.00189048	0.00164051	0.00178099	0.00183723	0.00222573	0.00195335	0.00187102	0.00196031	0.00176404	0.00189945	0.00202425	0.00168705	0.00193484	0.00183353	0.00185694	0.00179135	0.00166118	0.00157654	0.00175416
MosJ 97	Chr 6	61481094	SNV	C	T	EWC	900×WGS		0.0188216	ND		0.00251522	MosJ 97	0.00185394	0.00226414	0.0022291	0.00199608	0.00236211	0.00182454	0.00201658	0.00226673	0.00191988	0.00211146	0.00196471	0.00224626	0.00185072	0.00218653	0.00230029	0.00256124	0.00228323	0.00195798	0.00230526	0.00211284	0.00225383	0.00190358	0.00218233	0.00234789	0.00215604	0.00210613	0.00209621	0.00228209	0.00232369	0.00201848	0.00181817	0.001958	0.00223492	0.00238072	0.00212392	0.00211731
MosJ 98	Chr 10	97155225	SNV	T	C	EWC	900×WGS		0.011324	b-4*	Cell position determined by offspring	0.00390044	MosJ 98	0.00493046	0.00220085	0.00285652	0.00322741	0.00420772	0.00264599	0.00312293	0.0024861	0.00400305	0.00381183	0.0033825	0.00338983	0.00553804	0.00304625	0.00404127	0.00342435	0.00450671	0.00285278	0.51906	0.0031395	0.0028699	0.0043213	0.00300188	0.00400257	0.502028	0.00405723	0.00330306	0.00174401	0.00300146	0.00361733	0.00288023	0.00343101	0.00305867	0.00294592	0.498338	0.00387836
MosJ 99	Chr 2	164195677	SNV	G	A	EWC	900×WGS		0.0128593	ND_Group1		0.00118077	MosJ 99	0.00158604	0.00082476	0.000383556	0.00155794	0.00172024	0.00122789	0.0011381	0.00175311	0.000985398	0.00104219	0.000616357	0.00155114	0.00115057	0.001629	0.00109929	0.00121818	0.0010339	0.00186236	0.00152651	0.00136008	0.00130085	0.000817598	0.00100523	0.00204815	0.00119427	0.00192043	0.000892459	0.000885597	0.00156301	0.00146429	0.00124768	0.0017109	0.00153807	0.00100327	0.00120778	0.000971045
MosJ 101	Chr 2	39711459	SNV	C	T	EWC	900×WGS		0.0130776	k-7		0.00122732	MosJ 101	0.00104439	0.00103656	0.00137118	0.000717801	0.00064288	0.00245902	0.00140056	0.00108899	0.00138108	0.000905551	0.00105993	0.00162437	0.00202344	0.000714605	0.000816927	0.000535447	0.00142898	0.00133993	0.00151996	0.00215141	0.00141243	0.000919399	0.00228397	0.00199743	0.00215054	0.00187041	0.0018355	0.511879	0.00242378	0.000852606	0.00214054	0.00091001	0.00122378	0.00115274	0.00238353	0.00115075
MosJ 102	Chr 3	102121874	SNV	G	A	EWC	900×WGS		0.013181	ND_Group1		0.00128647	MosJ 102	0.000887863	0.000974459	0.000732096	0.0014054	0.00196713	0.00189404	0.00111758	0.00180077	0.00234558	0.00170699	0.000980901	0.00135685	0.00109667	0.00132672	0.00156376	0.00139512	0.00126969	0.000942922	0.000913451	0.000751138	0.00220516	0.00126356	0.00090464	0.00144941	0.00191475	0.00154676	0.00121788	0.00148082	0.00182401	0.00144591	0.00154091	0.00185824	0.00164564	0.000658361	0.00186704	0.0012694
MosJ 103	Chr 7	101516067	SNV	G	A	EWC	900×WGS		0.0134357	ND_Group1		0.00135465	MosJ 103	0.00789986	0.00315134	0.00313609	0.00507405	0.00687831	0.00765719	0.00399122	0.00381567	0.00422943	0.00491604	0.00619127	0.00594295	0.0061961	0.00483552	0.00528351	0.0042871	0.00371575	0.0063082	0.00451159	0.00593036	0.00424979	0.00542551	0.00491803	0.00538541	0.00821429	0.00265376	0.00525328	0.00415494	0.00478228	0.00470042	0.00622348	0.00523145	0.00499529	0.00567446	0.00488472	0.00326502
MosJ 104	Chr 17	92102208	SNV	G	C	EWC	900×WGS		0.014827	a-8		0.000254652	MosJ 104	0.00193883	0.000860001	0.00139659	0.00155438	0.0021106	0.00415169	0.00143852	0.451887	0.00195674	0.0019731	0.485218	0.00177926	0.00333553	0.00154574	0.000752658	0.49473	0.00149254	0.00211657	0.00151022	0.00252565	0.00121925	0.00179253	0.00207783	0.00334233	0.0049059	0.000870012	0.00219075	0.000589355	0.00168399	0.00195072	0.00249935	0.50722	0.00145702	0.480689	0.00152258	0.497222
MosJ 105	Chr 6	106329759	SNV	G	A	EWC	900×WGS		0.0151274	b-4*	Cell position determined by offspring	0.00104415	MosJ 105	0.00115281	0.000898607	0.00123069	0.00110306	0.00105134	0.00127796	0.00114867	0.00108578	0.000534569	0.000646099	0.000318776	0.00104712	0.000626861	0.0014301	0.000780031	0.000795292	0.000979752	0.000369004	0.499606	0.000628062	0.000656886	0.00153046	0.00094682	0.000925069	0.00110589	0.000917571	0.00135501	0.000280426	0.00165017	0.00102866	0.000423251	0.000844167	0.00130293	0.00146349	0.000931532	0.00114566
MosJ 106	Chr 7	26325272	SNV	C	T	EWC	900×WGS		0.0145414	k-8*	Cell position determined by offspring	0.000814589	MosJ 106	0.00219327	0.000892785	0.0012389	0.0012616	0.00307722	0.00220629	0.00119968	0.00115555	0.00120358	0.00125145	0.00119129	0.00192132	0.00210016	0.00121608	0.00112765	0.00142481	0.00102907	0.00191221	0.00131883	0.00100462	0.00253962	0.00207101	0.00121185	0.00129904	0.00650209	0.00149701	0.00217825	0.00116777	0.00182815	0.00107021	0.00126827	0.00091617	0.00165189	0.00132533	0.000890544	0.00211696
MosJ 107	Chr 1	87737181	SNV	A	C	EWC	900×WGS		0.0152526	b-5*	Cell position determined by offspring	8.19353e-05	MosJ 107	0.021636	0.0157096	0.0168926	0.0166599	0.0190974	0.0235762	0.0149294	0.0146093	0.0187266	0.0166722	0.0165442	0.0190326	0.0244473	0.0176616	0.0155853	0.0162373	0.0152993	0.0207086	0.0167496	0.0186066	0.0217481	0.0160405	0.0200156	0.0240929	0.0204389	0.0153902	0.0179872	0.0164467	0.0195044	0.0183878	0.0207039	0.0185053	0.018117	0.0207471	0.492422	0.0173104
MosJ 108	Chr 1	180795369	SNV	T	G	EWC	900×WGS		0.0168244	ND	High VAF in negative control	0.0344456	MosJ 108	0.0899589	0.0872859	0.0805037	0.0885457	0.0735031	0.082504	0.0847199	0.0836743	0.0847201	0.0897389	0.0834164	0.0877842	0.0894648	0.0831809	0.0874174	0.087707	0.0879444	0.083438	0.0813082	0.0917928	0.0946197	0.0849814	0.0876645	0.0914207	0.0918367	0.0837055	0.0875544	0.086569	0.0883999	0.0876029	0.0866966	0.0913771	0.0781893	0.0847953	0.0876044	0.0972082
MosJ 109	Chr 14	119108078	SNV	G	A	EWC	900×WGS		0.0196918	x-7		0.00411024	MosJ 109	0.0048057	0.00394898	0.00444961	0.00621006	0.00353857	0.00613337	0.0044629	0.00384971	0.00410878	0.0049703	0.00484694	0.00376934	0.00487864	0.00422224	0.00417537	0.00476136	0.00354976	0.0034753	0.00423216	0.00510523	0.00419231	0.00409237	0.00449323	0.00413418	0.00653404	0.00298883	0.0043959	0.00380367	0.00423885	0.00386925	0.00513644	0.00427198	0.00390847	0.00443387	0.00374766	0.00353923
MosJ 110	Chr 16	81938367	SNV	C	A	noEWC	900×WGS		0.0150235	ND		0.00139002	MosJ 110	0.00118102	0.00123282	0.000937594	0.00122995	0.00119736	0.00178372	0.00111161	0.00088333	0.00123658	0.00114184	0.00165138	0.00155071	0.00130765	0.00136786	0.000973581	0.00161626	0.00115752	0.000560738	0.000628977	0.00173586	0.00203014	0.00131039	0.00103248	0.00136064	0.00604108	0.000516015	0.00194118	0.00138895	0.000918738	0.00097437	0.00122304	0.0014769	0.00165713	0.00128711	0.00118489	0.00123057
MosJ 113	Chr 3	144622373	SNV	G	A	noEWC	900×WGS		0.0183206	b-4*	Cell position determined by offspring	0.000254654	MosJ 113	0.000577868	0.000662603	0.000280767	0.000532255	0.000430354	0.000431546	0.000264807	0	0.000528374	0.000473634	0.00024175	9.62279e-05	0.000304075	0	0.000211037	0.000461255	0.000191994	0.000149948	0.495445	0.000293628	0.000217462	0.000689338	0.000314928	0.00010395	0.000439947	0.000203355	0.00027959	0	0.000311494	0.000313414	0.00061187	0.000317058	0.00021978	0.00045295	0.000109266	0.000434122
MosJ 114	Chr 4	147500843	SNV	C	T	noEWC	900×WGS		0.0332661	h-5	Suspected tandem duplication region	0.00038709	MosJ 114	0.000632444	0.000406669	0.000525601	0.000551998	0.000142735	0.000731282	0.25418	0.000896428	0.000542035	0.000535619	0.000736294	0.000348311	0.000244786	0.000271131	0.252407	0.000377929	0.000524634	0.00022106	0.000407539	0.000598913	0.000313955	0.000361685	0.000607165	0.000750856	0.000651713	0.000496524	0.000541632	0.24529	0.000869481	0.247633	0.000402982	0.000420301	0.000559441	0.000536855	0.000721947	0.000648263
MosJ 115	Chr 1	58092006	SNV	G	A	EWC	900×WGS		0.0127055	ND		0.00115905	MosJ 115	0.00124978	0.00104745	0.00103573	0.00115922	0.00125104	0.00132387	0.000905785	0.00151313	0.00102234	0.000995379	0.00101951	0.00129698	0.00143358	0.00104786	0.00109847	0.00125278	0.0014645	0.00114196	0.00141288	0.00120388	0.0015845	0.00111666	0.000766567	0.00111884	0.00117023	0.0013038	0.00100291	0.00112523	0.00122657	0.00131062	0.00124903	0.00089129	0.0012848	0.00130145	0.000888855	0.00125879
MosJ 122	Chr 4	116050665	SNV	G	T	EWC	900×WGS		0.112815	x-2		0.00165141	MosJ 122	0.00171293	0.00149605	0.00181717	0.00239136	0.481257	0.00182267	0.00179709	0.00181197	0.00218618	0.00184197	0.00179148	0.490562	0.00184294	0.00175076	0.00148362	0.00176596	0.00177061	0.00153259	0.0019337	0.00190776	0.00168703	0.00192161	0.00200061	0.00223236	0.00195523	0.00230136	0.00190088	0.00151698	0.00163798	0.00181906	0.498158	0.00143686	0.0016533	0.00206635	0.498322	0.00168318
MosJ 124	Chr 5	67765158	SNV	C	T	EWC	900×WGS		0.0121766	ND		0.000821847	MosJ 124	0.000734903	0.000892698	0.00069979	0.000852712	0.000721691	0.00081507	0.000871671	0.000607457	0.000696663	0.000916966	0.000785227	0.000939169	0.000738716	0.00075803	0.00094527	0.00052233	0.000874843	0.000750872	0.000651564	0.000763173	0.000875387	0.000554447	0.000822626	0.000813383	0.000674046	0.000937785	0.000732132	0.000797303	0.000811708	0.000910467	0.000758203	0.00061895	0.00102591	0.00074438	0.000678434	0.000739412
MosJ 125	Chr 6	63544839	SNV	G	A	EWC	900×WGS		0.0114035	k-8*	Cell position determined by offspring	0.00112345	MosJ 125	0.000897935	0.00110359	0.00113868	0.000955244	0.00128255	0.000948945	0.00127489	0.00124594	0.00101407	0.00146601	0.000964966	0.00109468	0.00097313	0.0012771	0.0010511	0.00101304	0.00104983	0.00114242	0.000870867	0.000872635	0.00128068	0.00108672	0.000989691	0.000851712	0.000842954	0.00088373	0.00103024	0.00104753	0.00106772	0.00114966	0.000943551	0.000958667	0.00122123	0.000908377	0.000926865	0.00102409
MosJ 126	Chr 9	81745263	indel	C	CT	EWC	900×WGS		0.0397112	a-6	indel	0.000194615	MosJ 126	0.000480426	9.49577e-05	0.00040126	0.00033307	0.00120575	0.000271717	0.000213787	0.333893	0.000613293	0.000492195	0.000140034	0.000607223	0.000569502	0.000167832	0.000581657	0.327754	0.000267669	0.000255934	0.000150941	0.000270392	0.000403237	0.000379682	0.000675776	0.000467058	0.000506079	0.331974	0.000269309	0.000261845	0.000334829	0.00016456	0.00106283	0.328114	0.000364425	0.329725	0.000263723	0.000371711
MosJ 127	Chr 9	112439672	SNV	T	G	EWC	900×WGS		0.0100587	s-4		0.00121016	MosJ 127	0.00122712	0.00120752	0.00119675	0.00120566	0.00127005	0.00115369	0.0012693	0.00112112	0.00124034	0.00131566	0.00115508	0.00149597	0.000942074	0.00135774	0.00122662	0.00115725	0.00119491	0.00145505	0.00102805	0.00115713	0.00100927	0.00137704	0.00149918	0.00120933	0.00118925	0.00128024	0.0012288	0.00113329	0.00123048	0.0014301	0.00116656	0.000911534	0.00151952	0.00128453	0.00122533	0.00124354
MosJ 128	Chr 10	71603052	SNV	G	A	EWC	900×WGS		0.0107317	v-4		0.00235628	MosJ 128	0.00243023	0.00240176	0.00247115	0.00223654	0.00256657	0.0021822	0.00208531	0.00250583	0.00233929	0.00270147	0.00197943	0.00256005	0.00226	0.00235501	0.0023414	0.00259745	0.00251275	0.00208806	0.00253706	0.00239983	0.00237103	0.00285831	0.00242456	0.0025812	0.00232454	0.00212383	0.00258016	0.00247286	0.00235174	0.00243814	0.00223208	0.00239276	0.00241084	0.00212379	0.00264222	0.00250919
MosJ 131	Chr 13	32333391	SNV	C	T	EWC	900×WGS		0.0136437	r-4		0.000681275	MosJ 131	0.00122036	0.00103691	0.000622449	0.000691101	0.000751691	0.00074764	0.000769787	0.000857143	0.0008582	0.000587896	0.000740735	0.000765091	0.000866235	0.000791456	0.000772321	0.000578739	0.000711911	0.000623182	0.000989573	0.000668822	0.000679929	0.000934517	0.000668735	0.000694851	0.000653878	0.000979556	0.000768457	0.000713533	0.000681404	0.000912774	0.000796379	0.000727355	0.000823045	0.000601142	0.000977591	0.00093797
MosJ 132	Chr 19	19705504	SNV	G	A	EWC	900×WGS		0.0137318	e-6*	Cell position determined by offspring	0.00142412	MosJ 132	0.00149359	0.00133622	0.00145601	0.00173782	0.00113168	0.00171777	0.00133077	0.00146207	0.000942233	0.00120096	0.00130658	0.00140986	0.00143041	0.00196518	0.00136372	0.00156533	0.00131901	0.00159981	0.00112654	0.00133937	0.00108195	0.00134498	0.00142753	0.00193432	0.00158149	0.00153755	0.00153285	0.00133493	0.00131907	0.00107736	0.00134491	0.00159278	0.00211237	0.00182058	0.00150483	0.0016684
														1
Genotyping results of ntES cell lines														WGS	WGS							WGS	WGS
	Chr	Pos		REF	ALT		WGS data	VAF in WGS_100×	VAF in WGS_900×merge	Cell position	Note	VAFS in negative control		ntES1	ntES2	ntES3	ntES4	ntES5	ntES6	ntES7	ntES8	ntES9	ntES10	ntES11	MAX VAF	Number of cell lines
MosJ 1	Chr 2	30001023	SNV	T	C	EWC	100×WGS	0.0816327	0.0287921	t-2		0.00350371	MosJ 1	0.004662	0.00431464	0.00324207	0.00148192	0.00335397	0.00300752	0.00338983	0.0036452	0.00257974	0.00435594	0.0025	0.004662	0
MosJ 2	Chr 3	43180517	SNV	G	A	EWC	100×WGS	0.0531915	0.160177	h-3		0.000384123	MosJ 2	0	0.00126636	0.00134529	0.00037594	0	0.000403063	0.000366703	0.00182537	0.000299043	0	0.00130039	0.00182537	0
MosJ 3	Chr 3	44980310	SNV	T	G	EWC	100×WGS	0.0697674	0.031401	g-4		0.000860956	MosJ 3	0.000574713	0.00117233	0.473992	0.00156495	0.000905387	0.00110011	0.000566572	0.00209644	0.00128041	0.000461255	0.00119546	0.473992	1
MosJ 4	Chr 3	150529800	SNV	C	A	EWC	100×WGS	0.122137	0.133882	a-3		0.000357782	MosJ 4	0.00192678	0	0.458387	0	0.00341686	0.467409	0	0.00281294	0.472277	0	0	0.472277	3
MosJ 5	Chr 3	157542251	SNV	G	A	EWC	100×WGS	0.0806452	0.0426929	u-3		0.000944025	MosJ 5	0.000843882	0.491335	0.000394633	0.000983284	0.505238	0.00164908	0.000925355	0.000996347	0.000573394	0.00123001	0.48042	0.505238	3
MosJ 6	Chr 4	28411309	SNV	T	G	EWC	100×WGS	0.0538462	0.040201	u-3		0.000100236	MosJ 6	0.000320205	0.506231	0.000267523	0.000236798	0.508756	0	0.000256805	0.000210837	0	0.000431406	0.507924	0.508756	3
MosJ 7	Chr 5	25452510	SNV	A	G	EWC	100×WGS	0.240741	0.134648	a-3		0.00235954	MosJ 7	0.00241838	0.00134318	0.510231	0.00200746	0.00155239	0.488984	0.00118448	0.00353357	0.512961	0.00158898	0.0032277	0.512961	3
MosJ 8	Chr 5	38864983	SNV	A	T	EWC	100×WGS	0.11236	0.041129	t-2		0.000605111	MosJ 8	0.000517509	0.000285796	0.000463607	0.0011586	0.00103991	0.00107339	0.000688073	0.000450857	0.00108173	0.00118953	0.00184316	0.00184316	0
MosJ 9	Chr 5	61696521	SNV	G	C	EWC	100×WGS	0.288462	0.146552	a-3		5.58005e-05	MosJ 9	0.000347102	0	0.488781	0	0.000287109	0.477632	0	0.000789474	0.493158	0.000260281	0	0.493158	3
MosJ 10	Chr 5	118040448	SNV	T	G	EWC	100×WGS	0.278689	0.131993	a-3		0.000383068	MosJ 10	0	0.000633914	0.501524	0.000283126	0.00107672	0.489935	0	0	0.485805	0.000279642	0	0.501524	3
MosJ 11	Chr 6	32459090	SNV	C	G	EWC	100×WGS	0.292929	0.300086	a-2		0.000191608	MosJ 11	0.000799361	0.000962464	0.494092	0.498841	0.000840866	0.496428	0.00138658	0.47852	0.501242	0.00019685	0.000927214	0.501242	5
MosJ 12	Chr 6	51631763	SNV	T	C	EWC	100×WGS	0.184211	0.174603	u-1		0.00462003	MosJ 12	0.524419	0.491627	0.00366599	0.00291333	0.478438	0.00480077	0.484549	0.00546624	0.00488865	0.494538	0.500189	0.524419	6
MosJ 13	Chr 6	132883301	SNV	T	C	EWC	100×WGS	0.0727273	0.0269841	t-2		0.00397567	MosJ 13	0.00294574	0.00384481	0.00525105	0.00418768	0.0034087	0.0029882	0.00367156	0.00346848	0.00309701	0.00329077	0.00430622	0.00525105	0
MosJ 15	Chr 8	60387990	SNV	G	C	EWC	100×WGS	0.102041	0.0638468	u-2		0.0012005	MosJ 15	0.493413	0.493062	0.000158755	0.00021699	0.506853	0.000345224	0.000426439	0.000101204	0.000470367	0.000482905	0.469637	0.506853	4
MosJ 17	Chr 10	72899626	SNV	C	A	EWC	100×WGS	0.0720721	0.133731	h-3		0.000638424	MosJ 17	0.000928505	0.00121212	0.00219092	0.00196078	0.000254388	0.00116925	0.00316729	0.000232504	0.00162829	0.00160514	0.00189548	0.00316729	0
MosJ 18	Chr 10	74493454	SNV	C	T	EWC	100×WGS	0.0727273	0.027193	g-4		0.00340731	MosJ 18	0.00242082	0.00289658	0.501846	0.00178167	0.00271132	0.00187091	0.00225023	0.00186728	0.00296121	0.0019084	0.00272904	0.501846	1
MosJ 20	Chr 11	13758835	SNV	G	A	EWC	100×WGS	0.152174	0.0724638	u-2		0.00119063	MosJ 20	0.499438	0.49058	0.00149421	0.00204988	0.487573	0.00277971	0.000445236	0.00113928	0.00168748	0.00336889	0.499194	0.499438	4
MosJ 23	Chr 11	118789688	SNV	C	T	EWC	100×WGS	0.111111	0.0994764	a-4		0.0013238	MosJ 23	0.000360101	0.00120882	0.00172592	0.00171331	0.00245232	0.487011	0.0011713	0.00136761	0.493523	0.0010773	0.00201478	0.493523	2
MosJ 25	Chr 13	9843606	SNV	C	T	EWC	100×WGS	0.178082	0.130601	a-3		0.000624523	MosJ 25	0	0.000534474	0.519111	0.00132979	0.00168397	0.522779	0.000490196	0.000223614	0.52217	0.000689022	0.000302847	0.522779	3
MosJ 27	Chr 13	41601495	SNV	G	A	EWC	100×WGS	0.333333	0.31533	a-1		0.000785634	MosJ 27	0	0.00120337	0.520256	0.509091	0	0.487332	0.00129199	0.497347	0.509186	0	0.00177936	0.520256	5
MosJ 28	Chr 13	52744135	SNV	G	A	EWC	100×WGS	0.0789474	0.137304	x-2		0.00116678	MosJ 28	0.000737735	0.00173886	0.000838364	0.00294855	0.00200631	0.00370755	0.489694	0.00109556	0.00107773	0.501031	0.000513787	0.501031	2
MosJ 30	Chr 14	96805436	SNV	G	A	EWC	100×WGS	0.11236	0.061008	u-2		0.0006035	MosJ 30	0.507387	0.492537	0.000377358	0.000330907	0.470881	0.00132275	0.000312012	0	0.000536049	0.000892857	0.475229	0.507387	4
MosJ 33	Chr 17	29033738	SNV	A	T	EWC	100×WGS	0.118812	0.109076	x-2		0.000380066	MosJ 33	0.000600962	0.000849798	0.000281057	0.000812018	0.00103178	0.00075188	0.491382	0.000461148	0.000798085	0.527759	0.000859107	0.527759	2
MosJ 34	Chr 18	31002810	SNV	A	G	EWC	100×WGS	0.0530973	0.0269627	t-2		0.00441334	MosJ 34	0.00589023	0.00470219	0.00610565	0.00573566	0.00297303	0.00531377	0.00501187	0.00315657	0.00333542	0.00559006	0.00413625	0.00610565	0
MosJ 35	Chr 19	7495976	SNV	G	C	EWC	100×WGS	0.15493	0.136322	a-3		4.74586e-05	MosJ 35	0.0009298	0	0.504355	0.000614628	0.000400641	0.505634	0.000949668	0.000189107	0.500191	0	0.000560538	0.505634	3
MosJ 37	Chr 4	115039628	indel	TC	T	EWC	100×WGS	0.207921	0.178727	u-1	indel	0.000159426	MosJ 37	0.503529	0.490602	0.000670991	0.000191755	0.509586	0.0016698	0.505066	0.0011097	0.000708592	0.512281	0.503533	0.512281	6
MosJ 38	Chr 5	60254092	indel	AT	A	EWC	100×WGS	0.0891089	0.0232342	t-2	indel, High VAF in negative control	0.0305512	MosJ 38	0.0351734	0.0289913	0.0303474	0.0330839	0.0327956	0.0316742	0.0337742	0.0353022	0.0276309	0.0332644	0.0332315	0.0353022	0
MosJ 40	Chr 6	101850462	indel	GA	G	EWC	100×WGS	0.0860215	0.0658579	a-5	indel	6.23675e-05	MosJ 40	0	0.000367377	0	0	0	0.48544	0	0	0.492741	0	0	0.492741	2
MosJ 42	Chr 11	17786233	indel	TTA	T	EWC	100×WGS	0.271186	0.205525	u-1*	indel, High VAF in negative control, cell position was manually determined	0.174736	MosJ 42	0.446797	0.4327	0.0283317	0.0092652	0.45968	0.00871587	0.437081	0.039989	0	0.474284	0.417695	0.474284	6
MosJ 45	Chr 15	69937436	indel	AT	A	EWC	100×WGS	0.0864198	0.0334317	e-3	indel, High VAF in negative control	0.0262714	MosJ 45	0.0294517	0.0289319	0.0329326	0.0269002	0.0256256	0.0266153	0.0287453	0.0290199	0.0198151	0.518148	0.0282362	0.518148	1
MosJ 53	Chr 9	12444215	SNV	C	T	noEWC	100×WGS	0.0421053	0.104357	x-2		0.00179022	MosJ 53	0.00250898	0.00246185	0.0015637	0.00179011	0.00195676	0.00188164	0.495892	0.00166131	0.00195329	0.487774	0.00209721	0.495892	2
MosJ 55	Chr 9	75750049	SNV	T	C	noEWC	100×WGS	0.0588235	0.0590015	a-5	High VAF in negative control	0.0122635	MosJ 55	0.0321323	0.0302493	0.0331732	0.0295718	0.0336397	0.473768	0.030017	0.03005	0.488098	0.0290297	0.0330672	0.488098	2
MosJ 56	Chr 10	106639317	SNV	C	G	noEWC	100×WGS	0.0727273	0.135569	h-3		4.78973e-05	MosJ 56	0.000433505	0.000763796	0	0.00013071	0.00103224	9.53834e-05	0.000360599	7.44048e-05	0	6.79302e-05	0.000254375	0.00103224	0
MosJ 58	Chr 15	52878947	SNV	T	G	noEWC	100×WGS	0.0588235	0.0341297	e-5		0.00204029	MosJ 58	0.00498453	0.00791803	0.00725953	0.00524017	0.00561798	0.00837558	0.00646134	0.00963808	0.00456454	0.00401826	0.00707182	0.00963808	0
MosJ 59_div2	Chr X	122693584	SNV	A	C	noEWC	100×WGS	0.0545455		ND		0.000573862	MosJ 59_div2	0.000646412	0.000421408	0.00114242	0.000856409	0.000440917	0.000365631	0.000378215	0.00144509	0.000963082	0.00140499	0.000903342	0.00144509	0
MosJ 66	Chr 2	65276098	SNV	G	A	EWC	900×WGS		0.0213493	x-6		0.00118141	MosJ 66	0.000996218	0.000893256	0.000980018	0.00112391	0.00108155	0.00149152	0.000873812	0.00104053	0.000895339	0.0012458	0.000917728	0.00149152	0
MosJ 67	Chr 12	10106637	SNV	G	C	EWC	900×WGS		0.0218447	a-7		0.000549453	MosJ 67	0.00027866	0.00016632	0.000178725	0.000360496	0.000427409	0.494973	0.000223164	0	0.000279449	0.00019454	0.000514967	0.494973	1
MosJ 68	Chr 18	27437337	SNV	T	A	EWC	900×WGS		0.0229592	g-4		0.000136949	MosJ 68	0.000299179	0.000322443	0.495768	0.000261708	0.000372257	0.000424336	0.000519852	0.000332672	0.000398114	0.000269839	0.000459544	0.495768	1
MosJ 70	Chr 15	39038162	SNV	T	A	EWC	900×WGS		0.0255387	r-3		0.000597086	MosJ 70	0.000550309	0.000771001	0.000561108	0.492659	0.000520533	0.000451045	0.000675204	0.515013	0.000443053	0.00071689	0.000770036	0.515013	2
MosJ 71	Chr 5	127791331	SNV	G	A	EWC	900×WGS		0.0257611	o-6		0.00108514	MosJ 71	0.00093551	0.00100414	0.00119178	0.000948567	0.0010099	0.00100425	0.000993813	0.000857941	0.000982454	0.000930551	0.000819055	0.00119178	0
MosJ 72	Chr 6	138556245	SNV	A	T	EWC	900×WGS		0.0260138	o-6		0.000353171	MosJ 72	0.000438664	0.000704938	0.000501855	0.000849305	0.000390817	0.000682812	0.000637649	0.000504738	0.000638211	0.000728117	0.000672779	0.000849305	0
MosJ 73	Chr 12	24393082	SNV	G	A	EWC	900×WGS		0.026738	h-9*	Cell position determined by offspring	0.00105607	MosJ 73	0.00128148	0.00141067	0.00135152	0.00130513	0.00148624	0.00126621	0.00140054	0.00114385	0.00127942	0.00112708	0.0013653	0.00148624	0
MosJ 74	Chr 1	11382055	SNV	G	C	EWC	900×WGS		0.0270701	d-6		0.000846299	MosJ 74	0.000196968	0.00016801	0.000227758	0.0002036	0.000178366	0.000211522	0.000116467	0.000176513	0.487786	9.5036e-05	0.000160859	0.487786	1
MosJ 75	Chr 4	43528155	SNV	C	T	EWC	900×WGS		0.0303929	o-5		0.00160576	MosJ 75	0.00160511	0.00184062	0.00180232	0.00160762	0.00165909	0.00197175	0.0013523	0	0.00168615	0.00178394	0.0017115	0.00197175	0
MosJ 76	Chr 13	84930481	SNV	G	A	EWC	900×WGS		0.0549915	x-4		0.00120192	MosJ 76	0.00126333	0.00135243	0.00143263	0.00126304	0.00114296	0.00156378	0.00103972	0.00292398	0.00127437	0.00114468	0.00125598	0.00292398	0
MosJ 77	Chr 18	86920934	SNV	T	A	EWC	900×WGS		0.0554675	h-7		0.000469011	MosJ 77	0.000545407	0.000317315	0.000307844	0.000277088	0.000389412	0.000275316	0.000296952	0	0.000618723	0.000319541	0.000402216	0.000618723	0
MosJ 78_div2	Chr X	115773248	SNV	C	A	EWC	900×WGS		0.0807249	x-5		0.000105128	MosJ 78_div2	0.000332198	0.000353809	0.000210577	0.000203998	0.000216116	0.000347013	0.000151227	0.000210236	5.09563e-05	0.000199625	0.000161217	0.000353809	0
MosJ 79	Chr 4	113727133	SNV	A	G	EWC	900×WGS		0.08285	x-3		0.0034546	MosJ 79	0.00284225	0.00329909	0.00333817	0.00313357	0.00277719	0.00340326	0.510025	0.00320555	0.003262	0.0035276	0.00280855	0.510025	1
MosJ 80	Chr 7	33525242	SNV	T	G	EWC	900×WGS		0.0840787	x-3		0.00274019	MosJ 80	0.00325547	0.00253116	0.00279784	0.00276714	0.00332119	0.00272397	0.524128	0.029316	0.00267423	0.0027241	0.00351858	0.524128	1
MosJ 81	Chr 1	30848799	SNV	G	A	EWC	900×WGS		0.0869925	x-3		0.00126796	MosJ 81	0.00118554	0.00104073	0.00119392	0.000945449	0.001133	0.00144235	0.660631	0.00120382	0.00140725	0.000976614	0.00130936	0.660631	1
MosJ 82	Chr 1	184095585	SNV	A	C	EWC	900×WGS		0.0883503	x-3		0.00191878	MosJ 82	0.00256174	0.00219054	0.00183388	0.00193256	0.00217851	0.00245798	0.335948	0.00235562	0.00249008	0.00173508	0.00220414	0.335948	1
MosJ 83	Chr 11	42650505	SNV	C	G	EWC	900×WGS		0.0963455	h-6		0.000694282	MosJ 83	0.000429361	0.000534574	0.00024483	0.000177353	0.000495312	0.000587168	0.00048206	0.000437685	0.000496382	0.000190008	0.000256108	0.000587168	0
MosJ 84	Chr 5	116653758	SNV	C	T	EWC	900×WGS		0.134303	h-4		0.00113202	MosJ 84	0.00376329	0.00554201	0.00566572	0.00536913	0.00442732	0.00835368	0.00509561	0.00604964	0.00429021	0.00516304	0.00626819	0.00835368	0
MosJ 85	Chr 13	23581720	SNV	G	A	EWC	900×WGS		0.1425	h-3		0.00185137	MosJ 85	0.00194978	0.00178819	0.00214631	0.00184742	0.00183234	0.00179753	0.00177987	0.00184719	0.00215938	0.00226803	0.00194286	0.00226803	0
MosJ 86	Chr 19	17429587	SNV	C	T	noEWC	900×WGS		0.020219	ND		0.000946242	MosJ 86	0.000998406	0.000767421	0.000800681	0.00122272	0.00112911	0.00113498	0.000867901	0.00675676	0.000975366	0.00106775	0.00110389	0.00675676	0
MosJ 87	Chr 2	30751634	SNV	C	T	noEWC	900×WGS		0.0230608	o-6		0.00107168	MosJ 87	0.000726276	0.000701262	0.000951541	0.000761472	0.000898565	0.000912911	0.00114286	0.000907846	0.000826969	0.000762097	0.00102334	0.00114286	0
MosJ 88	Chr 13	92160294	SNV	C	T	noEWC	900×WGS		0.0259615	e-3		0.00042327	MosJ 88	0.000439391	0.000314079	0.000336341	0.000415608	0.000396131	0.0010222	0.00029579	0.000423352	0.000373384	0.512257	0.000362391	0.512257	1
MosJ 90	Chr 3	118238695	SNV	C	A	noEWC	900×WGS		0.0299625	a-8		0.000389765	MosJ 90	0.00089098	0.000575297	0.000761827	0.000812109	0.000659778	0.000918362	0.000694957	0.00086593	0.000631133	0.000827815	0.000995565	0.000995565	0
MosJ 91	Chr 7	14728786	SNV	C	T	noEWC	900×WGS		0.0303644	h-8		0.00116807	MosJ 91	0.00117	0.00139731	0.00125212	0.00108191	0.0012544	0.00130728	0.000995972	0	0.00129532	0.00117993	0.00128157	0.00139731	0
MosJ 92	Chr 6	123248662	SNV	G	A	noEWC	900×WGS		0.0444856	x-4		0.00189688	MosJ 92	0.00190132	0.0018412	0.00173386	0.00231997	0.00188869	0.00258429	0.00172464	0.00187002	0.00222745	0.00186351	0.00196063	0.00258429	0
MosJ 93	Chr 14	122761461	SNV	A	T	EWC	900×WGS		0.0155483	ND		9.00355e-05	MosJ 93	8.65111e-05	9.4027e-05	5.30338e-05	0.000148345	0.000115401	7.59756e-05	7.96979e-05	5.78928e-05	0.000105408	0.000107717	8.13052e-05	0.000148345	0
MosJ 94	Chr 5	57520799	SNV	T	A	EWC	900×WGS		0.0139116	e-4*	Cell position determined by offspring	0.000117602	MosJ 94	0.000223895	0.00028026	0.000203231	0.000373948	0.000185642	0.000427185	0.000119776	0.000180913	0.000214387	0.488485	0.000359849	0.488485	1
MosJ 95_div2	Chr X	79491580	SNV	A	C	EWC	900×WGS		0.0176991	ND		0.000164411	MosJ 95_div2	0.000532016	0.000465973	0.000456318	0.000558869	0.000311126	0.000532776	0.000601286	0.000446915	0.000567823	0.000372635	0.000488584	0.000601286	0
MosJ 96	Chr 6	61292895	SNV	G	A	EWC	900×WGS		0.0165138	v-3		0.00194742	MosJ 96	0.515637	0.00202857	0.00178775	0.00168116	0.0024274	0.00207259	0.00223358	0.00200769	0.00188437	0.00204453	0.00192568	0.515637	1
MosJ 97	Chr 6	61481094	SNV	C	T	EWC	900×WGS		0.0188216	ND		0.00251522	MosJ 97	0.00270826	0.00216453	0.00217465	0.00203448	0.00243434	0.00216812	0.00222799	0.00242634	0.00256572	0.00214295	0.00193801	0.00270826	0
MosJ 98	Chr 10	97155225	SNV	T	C	EWC	900×WGS		0.011324	b-4*	Cell position determined by offspring	0.00390044	MosJ 98	0.00336673	0.00247859	0.00343849	0.00295623	0.00405983	0.00307578	0.00338177	0.00252635	0.00235997	0.00300885	0.00489879	0.00489879	0
MosJ 99	Chr 2	164195677	SNV	G	A	EWC	900×WGS		0.0128593	ND_Group1		0.00118077	MosJ 99	0.000919235	0.00108485	0.00136893	0.0010156	0.00180095	0.00156219	0.00148467	0.00092987	0.00148505	0.00150396	0.00162618	0.00180095	0
MosJ 101	Chr 2	39711459	SNV	C	T	EWC	900×WGS		0.0130776	k-7		0.00122732	MosJ 101	0.00171735	0.00169465	0.00134807	0.000932314	0.00118217	0.00193662	0.00120899	0.00170358	0.00232677	0.00129492	0.00106125	0.00232677	0
MosJ 102	Chr 3	102121874	SNV	G	A	EWC	900×WGS		0.013181	ND_Group1		0.00128647	MosJ 102	0.00113355	0.00122046	0.00199805	0.000761357	0.00149046	0.000796514	0.00199805	0.00104158	0.00132063	0.0013919	0.00173603	0.00199805	0
MosJ 103	Chr 7	101516067	SNV	G	A	EWC	900×WGS		0.0134357	ND_Group1		0.00135465	MosJ 103	0.00288236	0.00583109	0.00343716	0.00489303	0.00526153	0.00570815	0.00452034	0.00524686	0.00429799	0.00506757	0.00642357	0.00642357	0
MosJ 104	Chr 17	92102208	SNV	G	C	EWC	900×WGS		0.014827	a-8		0.000254652	MosJ 104	0.00104058	0.00207662	0.00112185	0.00165746	0.000823094	0.00232757	0.00148299	0.00219161	0.000693451	0.00112894	0.00215263	0.00232757	0
MosJ 105	Chr 6	106329759	SNV	G	A	EWC	900×WGS		0.0151274	b-4*	Cell position determined by offspring	0.00104415	MosJ 105	0.000448498	0.000797925	0.000838785	0.00143947	0.00102312	0.0010015	0.00117292	0.00107477	0.000610314	0.000765462	0.00159151	0.00159151	0
MosJ 106	Chr 7	26325272	SNV	C	T	EWC	900×WGS		0.0145414	k-8*	Cell position determined by offspring	0.000814589	MosJ 106	0.00124077	0.00115378	0.00104484	0.00114286	0.00202001	0.0018166	0.00043262	0.00150247	0.00146628	0.00100067	0.00179748	0.00202001	0
MosJ 107	Chr 1	87737181	SNV	A	C	EWC	900×WGS		0.0152526	b-5*	Cell position determined by offspring	8.19353e-05	MosJ 107	0.016662	0.0170499	0.0172526	0.0163963	0.0164491	0.0219027	0.0160809	0.0178499	0.0151515	0.0157989	0.0215849	0.0219027	0
MosJ 108	Chr 1	180795369	SNV	T	G	EWC	900×WGS		0.0168244	ND	High VAF in negative control	0.0344456	MosJ 108	0.083252	0.0820093	0.0810962	0.0783685	0.0866167	0.0884473	0.085748	0.0824959	0.0824842	0.0817627	0.0771227	0.0884473	0
MosJ 109	Chr 14	119108078	SNV	G	A	EWC	900×WGS		0.0196918	x-7		0.00411024	MosJ 109	0.00461863	0.00559763	0.0039436	0.00312444	0.00566588	0.00495248	0.00442907	0.00549399	0.00363999	0.00382485	0.00408668	0.00566588	0
MosJ 110	Chr 16	81938367	SNV	C	A	noEWC	900×WGS		0.0150235	ND		0.00139002	MosJ 110	0.000631739	0.0010415	0.00187894	0.00113871	0.00175577	0.0011954	0.000851789	0.00146339	0.00143982	0.00106815	0.00126557	0.00187894	0
MosJ 113	Chr 3	144622373	SNV	G	A	noEWC	900×WGS		0.0183206	b-4*	Cell position determined by offspring	0.000254654	MosJ 113	0.000564653	0.000212811	0.000293858	0.000329544	0.000116131	0.000226006	0.000456361	0.000483209	0	0.000568882	0.000751103	0.000751103	0
MosJ 114	Chr 4	147500843	SNV	C	T	noEWC	900×WGS		0.0332661	h-5	Suspected tandem duplication region	0.00038709	MosJ 114	0.000732308	0.000567179	0.000768682	0.000563724	0.00074438	0.00042349	0.000823271	0.000144907	0.000238081	0.000478927	0.00026363	0.000823271	0
MosJ 115	Chr 1	58092006	SNV	G	A	EWC	900×WGS		0.0127055	ND		0.00115905	MosJ 115	0.00118425	0.00125116	0.00114762	0.00130544	0.00111599	0.00125027	0.00125871	0.00124345	0.00129201	0.00115206	0.00127014	0.00130544	0
MosJ 122	Chr 4	116050665	SNV	G	T	EWC	900×WGS		0.112815	x-2		0.00165141	MosJ 122	0.00224641	0.00186382	0.00202704	0.00201474	0.00191953	0.00151367	0.50265	0.00200017	0.00136513	0.486863	0.00159996	0.50265	2
MosJ 124	Chr 5	67765158	SNV	C	T	EWC	900×WGS		0.0121766	ND		0.000821847	MosJ 124	0.000811253	0.000710721	0.000821703	0.000888735	0.000995579	0.00142767	0.000750537	0.000688574	0.000743458	0.00060408	0.000752644	0.00142767	0
MosJ 125	Chr 6	63544839	SNV	G	A	EWC	900×WGS		0.0114035	k-8*	Cell position determined by offspring	0.00112345	MosJ 125	0.00108062	0.00102647	0.00112571	0.00107018	0.00106153	0.0010167	0.00124145	0.000952086	0.0011353	0.000815544	0.00137144	0.00137144	0
MosJ 126	Chr 9	81745263	indel	C	CT	EWC	900×WGS		0.0397112	a-6	indel	0.000194615	MosJ 126	0.000641108	0.000715584	0.000345203	0.000455211	0.00167622	0.332728	0.000765589	0.000252106	0.000174106	0.000353607	0.000235582	0.332728	1
MosJ 127	Chr 9	112439672	SNV	T	G	EWC	900×WGS		0.0100587	s-4		0.00121016	MosJ 127	0.0015232	0.00139372	0.000919315	0.495386	0.00121155	0.0012621	0.00116451	0.00112868	0.00127233	0.000903083	0.00144254	0.495386	1
MosJ 128	Chr 10	71603052	SNV	G	A	EWC	900×WGS		0.0107317	v-4		0.00235628	MosJ 128	0.491952	0.00252777	0.00243902	0.00222039	0.00254489	0.00235411	0.00230319	0.00248476	0.00272127	0.00224422	0.0027528	0.491952	1
MosJ 131	Chr 13	32333391	SNV	C	T	EWC	900×WGS		0.0136437	r-4		0.000681275	MosJ 131	0.000769753	0.000955584	0.000584454	0.00076826	0.000643277	0.000673706	0.000655956	0.478577	0.000645119	0.000806938	0.000653179	0.478577	1
MosJ 132	Chr 19	19705504	SNV	G	A	EWC	900×WGS		0.0137318	e-6*	Cell position determined by offspring	0.00142412	MosJ 132	0.00183908	0.00168272	0.00118905	0.00150901	0.00193433	0.00135241	0.00145443	0.00168534	0.00147557	0.00126322	0.00151348	0.00193433	0
														1
[truncated: 18 more columns]
