# Supplementary material for: Early embryonic mutations reveal dynamics of somatic and germ cell lineages in mice
Source: HighWire-hosted journal article supplement (doi:10.1101/gr.276363.121), 2022-05-09
Supplement: Supplemental_Data_2.xlsx [file Supplemental_Data_2.xlsx]

## Sheet: WGS of MA lines
Supplemental Data 2. List of somatic and germline mutations
					Valiant allele frequency of joint call by HaplotypeCaller *								Total read depth in the position
					VAF in WGS _100×								Read depth in WGS _100×
#CHROM	POS	REF	ALT	TYPE	ConA33	ConB23	ConC31	ConD31	ConE29	ConH33	ConJ12	ConJb12	ConA33	ConB23	ConC31	ConD31	ConE29	ConH33	ConJ12	ConJb12	Mutations in the EWC region
Chr 1	6249270	C	T	SNV	0	0	0.5	0	0	0			89	101	96	104	109	85			in EWC
Chr 1	7319092	T	C	SNV	0	1	0	0	0	1			70	90	93	101	82	105			in EWC
Chr 1	7880663	G	T	SNV	0.510638	0	0	0	0	0			94	100	89	106	98	79			in EWC
Chr 1	8438600	C	T	SNV	0	0	0	0	0.427184	0			99	94	87	97	103	95			in EWC
Chr 1	9770188	GTGCGCGCGCGCGCGCGCGCGCACA	G	INDEL	0	0	0	0.388889	0	0			97	102	85	72	84	112			in EWC
Chr 1	9796499	G	A	SNV	0	0	0.45679	0	0	0			80	67	81	80	82	70			in EWC
Chr 1	9896841	C	G	SNV	0	1	0	0	0	0			74	84	78	80	113	82			in EWC
Chr 1	10020267	G	A	SNV	0	0	0	1	0	0			89	103	114	104	111	109			in EWC
Chr 1	11494525	T	G	SNV	0	0	0.010101	1	0	0			93	83	99	67	91	98			in EWC
Chr 1	13465638	C	T	SNV	0	1	1	0	0	0.989899			90	91	98	95	100	99			in EWC
Chr 1	15075671	G	A	SNV	1	0	0	0	0	0			78	84	71	95	70	105			in EWC
Chr 1	16773381	C	T	SNV	0	0	0.413793	0	0	0			86	75	87	89	72	98			in EWC
Chr 1	16813070	C	T	SNV	0	0	0.445783	0	0	0			73	89	83	94	76	83			in EWC
Chr 1	19234098	G	A	SNV	0	0	0	0.430556	0	0			57	61	64	72	67	58			in EWC
Chr 1	20529373	T	A	SNV	0	0	0	0	0.515464	0			97	105	79	98	97	91			in EWC
Chr 1	22394353	T	A	SNV							0.5	0							130	113	in EWC
Chr 1	26301665	C	G	SNV	0	0	0	0	0	0.48			60	69	74	81	76	75			in EWC
Chr 1	27125600	G	T	SNV	0	0	0.52	0	0	0			86	96	100	103	103	133			in EWC
Chr 1	27511852	A	G	SNV							0.505155	0							97	113	in EWC
Chr 1	27971818	G	A	SNV	0	0	0.459459	0	0	0			89	69	74	69	88	93			in EWC
Chr 1	28173766	T	A	SNV	0	0	0	0.466667	0	0			91	89	89	120	107	110			in EWC
Chr 1	29409439	G	T	SNV	0	0.5	0	0	0.0133333	0.0119048			81	66	79	77	75	84			in EWC
Chr 1	30668230	C	A	SNV	0	0	0	0	0	0.528302			88	91	82	84	65	106			in EWC
Chr 1	30993620	G	A	SNV	0	0	0.52809	0	0	0			68	82	89	96	78	90			in EWC
Chr 1	31108228	CAACT	C	Multisite	1	0	0	0	0	0			103	107	81	120	89	94			in EWC
Chr 1	31108233	A	AGGG	Multisite	1	0	0	0	0	0			103	108	82	119	90	91			in EWC
Chr 1	31899758	A	G	SNV	0.0428571	0.0357143	0.0140845	0.00909091	0.040404	1			70	84	71	110	99	58			in EWC
Chr 1	31949642	C	T	SNV	0	0	0.631579	0	0	0			62	72	57	56	69	53			in EWC
Chr 1	32570707	G	C	SNV							0.518868	0							106	112	in EWC
Chr 1	33146478	A	G	SNV	1	0	0	0	0	0			91	89	91	114	104	96			in EWC
Chr 1	33750997	A	AGGAAAGGAAAG	INDEL	0	0	0	0	0.4	0			68	66	75	78	60	89			in EWC
Chr 1	34058385	G	T	SNV	0	0	0	0	0	0.554455			119	99	90	100	114	101			in EWC
Chr 1	35012438	C	T	SNV	0.0119048	0	0	0	1	0			84	83	81	95	71	71			in EWC
Chr 1	35477088	A	G	SNV	0	1	0	0	0	0			74	60	64	77	65	58			in EWC
Chr 1	37020974	C	T	SNV	0	0	1	0	0	0			102	85	111	88	84	88			in EWC
Chr 1	37867646	T	G	SNV							0	0.482353							77	85	in EWC
Chr 1	38997096	C	T	SNV							0.503937	0							127	126	in EWC
Chr 1	40592267	A	T	SNV	0.010989	0	0	1	0	0			91	87	81	83	96	78			in EWC
Chr 1	40705520	C	G	SNV	0	0	1	0	0	1			99	97	97	129	118	106			in EWC
Chr 1	41603637	G	A	SNV	0	0	0	0.0131579	1	0			57	94	82	76	88	73			in EWC
Chr 1	42403440	G	A	SNV	0	0.00892857	0	0	0	0.478723			77	112	117	87	106	94			in EWC
Chr 1	42550825	C	T	SNV	1	0	0	0	0	0			57	66	76	74	74	58			in EWC
Chr 1	42836082	G	A	SNV							0.436893	0							103	98	in EWC
Chr 1	43443390	A	C	SNV	0	0.87931	0	0.0142857	0	0			63	58	73	70	72	59			in EWC
Chr 1	44054740	A	G	SNV	0	1	0	0	0	0			105	96	102	125	113	97			in EWC
Chr 1	45802089	G	A	SNV	0	0.537634	0	0	0	0			99	93	115	104	105	79			in EWC
Chr 1	46182984	C	T	SNV	1	0	0	1	1	0			91	86	102	107	105	76			in EWC
Chr 1	46329492	GC	G	INDEL	1	0	0	0	0	0			72	94	104	99	67	101			in EWC
Chr 1	47713138	T	A	SNV	0	1	0	0	0	0			103	113	104	95	112	106			in EWC
Chr 1	48465286	G	A	SNV							0	1							103	102	in EWC
Chr 1	48775272	T	A	SNV	0	0	0.987805	0	0	1			114	101	82	105	122	101			in EWC
Chr 1	53795951	C	T	SNV	0.0102041	0	0	0	1	0			98	95	85	104	95	77			in EWC
Chr 1	56815165	C	T	SNV	0	0	0	1	1	0			102	96	116	115	124	106			in EWC
Chr 1	57046050	G	A	SNV	0	0	0.543689	0	0	0			73	90	103	79	109	84			in EWC
Chr 1	57052698	G	A	SNV	0	0	0	0	0	0.478873			84	119	107	97	102	71			in EWC
Chr 1	57446381	G	A	SNV	0	0	1	0	0	0			112	109	102	119	105	90			in EWC
Chr 1	58051335	G	A	SNV	0	0	0	1	0	0			79	96	92	100	87	93			in EWC
Chr 1	59930562	C	T	SNV	1	0	0.00990099	0	0	0			92	101	101	98	89	97			in EWC
Chr 1	62377423	A	G	SNV							0	0.990476							98	105	in EWC
Chr 1	64219574	G	A	SNV	1	0	0	0	0	0			99	95	82	103	113	106			in EWC
Chr 1	65134502	C	T	SNV	1	0	0	0	0	0			83	95	93	79	96	87			in EWC
Chr 1	66030098	T	C	SNV	0	0	0	0	1	0			76	85	76	92	85	96			in EWC
Chr 1	66704811	T	A	SNV	0	0	0	0	1	0			94	103	95	103	97	75			in EWC
Chr 1	67007823	G	A	SNV	0	0	0	1	0	0.010101			96	95	106	95	101	99			in EWC
Chr 1	67130756	T	C	SNV	0	0.00826446	0	0	0	1			105	121	116	141	115	122			in EWC
Chr 1	68285280	A	T	SNV	0	0	0	0	1	0			116	106	108	129	93	128			in EWC
Chr 1	68433842	C	A	SNV	0	0	0	0	1	0			128	81	116	117	120	96			in EWC
Chr 1	72010956	ATATATATG	A	INDEL	0	0	0	0	0	0.472973			59	82	80	106	85	74			in EWC
Chr 1	72617147	C	G	SNV	0	1	0	0	0	0.464646			72	84	91	98	90	99			in EWC
Chr 1	72906928	C	T	SNV	0	0	0	0	0	0.46875			65	69	100	62	67	64			in EWC
Chr 1	73393269	C	A	SNV	0.56338	0	0	0	0	0			71	71	55	77	56	67			in EWC
Chr 1	74265419	T	C	SNV	0	0	1	0	0	0			83	71	84	92	87	84			in EWC
Chr 1	74520692	A	G	SNV	0.534884	0	0	0	0	0.011236			86	92	103	94	82	89			in EWC
Chr 1	74954483	C	A	SNV	0.0333333	0	0	0.969697	0.970149	0			60	73	77	66	67	75			in EWC
Chr 1	75216419	G	A	SNV	0	0	0	0	0	0.462963			92	86	98	71	91	108			in EWC
Chr 1	77676395	G	A	SNV	0	0	0	0	0	0.465649			124	113	121	133	117	131			in EWC
Chr 1	77714647	G	A	SNV	0	0	1	0	0	0			96	91	72	103	102	101			in EWC
Chr 1	81033786	G	A	SNV	0	0	1	0	0	0			78	89	94	101	88	82			in EWC
Chr 1	83121398	C	T	SNV							0.0119048	0.542056							84	107	in EWC
Chr 1	86564421	G	A	SNV	0	1	0	0	0	0			67	85	80	94	89	92			in EWC
Chr 1	87749615	C	CT	INDEL	1	1	1	1	0.990566	1			90	103	88	87	106	90			in EWC
Chr 1	89655070	C	T	SNV	0	0	1	0	0	0			74	96	78	103	85	72			in EWC
Chr 1	90812517	G	C	Multisite	0	0	0	0	1	0			65	115	93	108	91	111			in EWC
Chr 1	90812518	TAAG	T	Multisite	0	0	0	0	1	0			63	116	94	110	90	112			in EWC
Chr 1	91022469	T	A	SNV	0	0	0	0	0	0.493506			88	88	90	87	78	77			in EWC
Chr 1	91166930	C	G	SNV	1	1	1	1	1	1			80	97	84	109	89	83			in EWC
Chr 1	94100571	T	C	SNV	0	0.981818	0	0	0	0			63	55	59	63	51	78			in EWC
Chr 1	95497053	C	A	SNV	1	0	0	0	0	0			88	97	91	104	100	88			in EWC
Chr 1	95937845	G	A	SNV							0.546218	0							119	95	in EWC
Chr 1	95994114	G	A	SNV	0	0	0	0	0.520325	0			102	85	106	114	123	85			in EWC
Chr 1	96119620	G	A	SNV	0	0	0	1	0	0			84	100	83	89	89	103			in EWC
Chr 1	96868052	C	T	SNV							0	0.515464							75	97	in EWC
Chr 1	97045132	G	A	SNV	0.00943396	0	0	0	0.574468	0			106	100	98	110	94	87			in EWC
Chr 1	97414527	G	T	Multisite	1	0	0	0	0	0			88	82	80	94	70	95			in EWC
Chr 1	97414528	C	T	Multisite	1	0	0	0	0	0			88	82	80	95	70	95			in EWC
Chr 1	99281519	A	G	SNV	0	0	0	0.617021	0	0			83	90	108	94	106	98			in EWC
Chr 1	99310792	A	T	SNV	0	0	0	0	0	0.550725			77	95	73	89	75	69			in EWC
Chr 1	99653742	T	G	SNV	0.987342	0	0	0	0	0			79	105	97	120	116	103			in EWC
Chr 1	99900791	C	T	SNV	0	0	0	0	0	0.527273			77	100	100	104	99	110			in EWC
Chr 1	100542162	T	TAAAAAACAA	INDEL	0	0	0	0.391892	0	0			93	87	91	74	85	96			in EWC
Chr 1	100583899	G	T	SNV	1	0	0	0	0	0			88	86	91	93	85	99			in EWC
Chr 1	100847446	G	A	SNV	0	0	0.00934579	0	0	0.48			83	92	107	86	79	100			in EWC
Chr 1	101380041	C	T	SNV	0	0	0	0	0	0.495495			91	82	92	109	106	111			in EWC
Chr 1	101535817	T	C	SNV	0	0	0	0.478632	0	0			80	102	90	117	108	95			in EWC
Chr 1	102075974	G	T	SNV	0	0	0	0	0.505882	0			98	80	98	79	85	101			in EWC
Chr 1	102910177	C	G	SNV							0	0.495327							103	107	in EWC
Chr 1	103295526	C	T	SNV	1	0	0	0	0	0			93	92	103	125	83	88			in EWC
Chr 1	104188391	C	A	SNV	0	0	0	0	1	0			108	84	70	72	61	78			in EWC
Chr 1	104820935	A	G	SNV	0.99	1	1	1	1	1			100	118	115	139	130	108			in EWC
Chr 1	106087982	C	T	SNV	0	0	0	0	0	0.56338			71	77	76	72	88	71			in EWC
Chr 1	107594756	AC	A	INDEL							0	0.487805							92	82	in EWC
Chr 1	111198531	G	A	SNV	1	0	0	0	0	0			78	93	82	102	97	88			in EWC
Chr 1	111295283	G	A	SNV	0	0	1	0.00806452	0	0			91	98	99	124	94	105			in EWC
Chr 1	111767659	C	T	SNV	0	0	0	0	1	0			115	93	105	114	124	112			in EWC
Chr 1	113676729	G	A	SNV	0	0	0	0	0	1			74	83	76	87	90	90			in EWC
Chr 1	114359871	A	C	SNV	0	0	0.989691	0	0	0.010101			93	93	97	95	108	99			in EWC
Chr 1	114507280	C	A	SNV	0.011236	0	0	0.539326	0	0			89	71	61	89	57	84			in EWC
Chr 1	114690223	C	A	SNV							0	0.428571							76	98	in EWC
Chr 1	115301003	T	A	SNV	0	0	0	0	0	0.514563			81	72	89	105	85	103			in EWC
Chr 1	115432187	A	T	SNV	0	0	0.0163934	0	0	1			73	80	61	66	88	66			in EWC
Chr 1	116255509	G	C	SNV	0	1	0	0	0	0			93	87	101	116	99	83			in EWC
Chr 1	116370139	G	C	SNV	0	0	0	0	0.4625	0			71	78	78	105	80	63			in EWC
Chr 1	116393126	C	A	SNV	0	0	0	0.460784	0	0			82	67	83	102	89	83			in EWC
Chr 1	116985539	C	G	SNV	0	0	0	0.509091	0	0			92	103	83	110	86	92			in EWC
Chr 1	117159652	G	A	SNV	0	0.537037	0	0	0	0			92	108	83	90	107	101			in EWC
Chr 1	117363654	C	A	SNV	0	0	0	0.46729	0	0			83	82	91	107	91	83			in EWC
Chr 1	117488049	C	T	SNV							0	0.54023							88	87	in EWC
Chr 1	117510688	C	T	SNV	1	0	0	0	0	0			101	89	96	127	98	97			in EWC
Chr 1	118084459	G	C	SNV	0	0.407407	0	0	0	0			83	81	58	75	67	90			in EWC
Chr 1	119148203	C	A	SNV	0	0	0	0.395062	0.0136986	0.0121951			78	78	81	81	73	82			in EWC
Chr 1	123477174	G	T	SNV	0	0	0.0365854	0	0.449275	0.0166667			48	73	82	65	69	60			in EWC
Chr 1	123613075	G	A	SNV	0	0	1	0	0	0			77	115	74	96	111	95			in EWC
Chr 1	125970330	A	G	SNV	0	0.00847458	0	0.425197	0	0			109	118	101	127	118	111			in EWC
Chr 1	126242368	G	A	SNV	0	0	0	0	0	0.49			91	98	100	120	127	100			in EWC
Chr 1	126486836	C	T	SNV							0.606742	0							89	87	in EWC
Chr 1	128081373	C	T	SNV	1	0	0	0	0	0.012987			80	92	88	104	92	77			in EWC
Chr 1	128160473	G	T	Multisite	0	0	0	0	0	1			107	117	118	150	124	118			in EWC
Chr 1	128160474	G	T	Multisite	0	0	0	0	0	1			106	116	119	152	123	119			in EWC
Chr 1	128196183	T	G	SNV	0	0	0	0	0.514851	0			89	109	89	104	101	83			in EWC
Chr 1	129683292	T	G	SNV	0	0	0	0	0	1			68	83	83	96	80	82			in EWC
Chr 1	130394345	A	T	SNV	1	0	0	0.0108696	0	0			81	89	80	92	77	97			in EWC
Chr 1	130855654	T	C	SNV	0.988506	0	0	0.01	0	0			87	84	94	100	90	98			in EWC
Chr 1	132794153	C	T	SNV	0	0	1	0	0	1			73	69	90	71	72	75			in EWC
Chr 1	133115970	G	T	SNV	0	0	0	0	0.488095	0			66	77	107	92	84	71			in EWC
Chr 1	133300581	C	T	SNV	0	1	0	0	0	0			69	64	70	78	77	75			in EWC
Chr 1	134193485	A	C	SNV	0	0	1	0	0	0			91	88	94	75	77	64			in EWC
Chr 1	135460637	G	A	SNV	0	0	1	0	0	0			71	68	91	62	81	74			in EWC
Chr 1	136604733	A	C	SNV							0.478261	0							115	119	in EWC
Chr 1	138162412	C	T	SNV	1	0	0.00826446	0	0	0.010989			91	107	121	105	121	91			in EWC
Chr 1	138524284	G	A	SNV							0.530435	0							115	111	in EWC
Chr 1	139241227	C	T	SNV	1	1	1	1	1	0.989247			95	102	105	113	96	93			in EWC
Chr 1	141048115	T	A	SNV	0	1	1	0	0	0			107	93	129	122	112	110			in EWC
Chr 1	141082084	G	T	SNV	0	0	0	0	0	1			90	85	94	95	79	95			in EWC
Chr 1	141107310	C	T	SNV	0	0.505747	0	0	0.00909091	0			79	87	83	106	110	86			in EWC
Chr 1	142916168	A	G	SNV	0	0	0	1	0.971014	0			58	69	59	66	69	55			in EWC
Chr 1	143369110	G	A	SNV	0.0294118	0	0.0138889	0.563636	0.0196078	0.0144928			68	51	72	55	51	69			in EWC
Chr 1	143606795	AAAATATTAC	A	INDEL	0	0	0	0	0.52	0			107	95	101	111	100	91			in EWC
Chr 1	144845389	T	C	SNV	0	0	0	0	0	1			88	91	89	104	94	83			in EWC
Chr 1	146037218	C	T	SNV	0	0	0	0.411215	0	0			100	110	126	107	109	97			in EWC
Chr 1	146099037	A	T	SNV	0	0	0	0.491071	0	0			90	104	111	112	119	98			in EWC
Chr 1	146472935	A	C	SNV	0	0	0	0	0	0.488889			88	104	100	104	92	90			in EWC
Chr 1	147235050	G	A	SNV	0	0	0	0.526882	0	0			86	110	110	93	118	95			in EWC
Chr 1	148429770	A	T	SNV	0	0	0	0.509804	0	0			79	126	97	102	116	104			in EWC
Chr 1	148662282	A	T	SNV	0	0	1	0	0	0			111	97	96	108	114	98			in EWC
Chr 1	148877242	T	A	SNV	0	0	0	0.505618	0	0			93	72	64	89	80	63			in EWC
Chr 1	148984537	G	C	SNV							0.471264	0							87	96	in EWC
Chr 1	149111268	G	A	SNV							0	0.5							121	118	in EWC
Chr 1	150165598	G	A	SNV	0	0	0	0.354839	0	0			79	68	77	62	82	75			in EWC
Chr 1	150420726	A	T	SNV	0	0	0	0	0	1			81	94	100	118	116	95			in EWC
Chr 1	151315349	G	A	SNV	0	0	1	0	0	0			98	82	87	73	73	74			in EWC
Chr 1	151543283	AATTAAAAAAAC	A	INDEL	0	0	0	0.415385	0	0			80	73	75	65	62	82			in EWC
Chr 1	154938431	C	T	SNV	1	0	0	0	0	0			87	90	83	99	93	113			in EWC
Chr 1	155761270	C	T	SNV	0	0	0	1	0	0			88	86	93	109	98	88			in EWC
Chr 1	156860894	G	A	SNV	0	0	0.9875	0	0	0.0131579			108	130	80	105	104	76			in EWC
Chr 1	157179764	C	T	SNV							0.469027	0							113	111	in EWC
Chr 1	157367739	A	C	SNV	0	0	0	0	0.00952381	1			111	104	107	111	105	76			in EWC
Chr 1	159743051	C	T	SNV	0	0	0	0	0.488095	0			62	105	91	106	84	75			in EWC
Chr 1	160036359	T	G	SNV	1	0	0	0	0	0.0108696			90	102	89	92	104	92			in EWC
Chr 1	161131485	C	G	SNV	1	0	0	0	0	0			75	82	93	85	86	79			in EWC
Chr 1	163289265	A	G	SNV	1	0	0	0	0	0			99	93	114	110	120	113			in EWC
Chr 1	163895782	A	T	SNV	0	0	1	0	0	0			111	99	79	100	106	81			in EWC
Chr 1	165060793	G	A	SNV	0	0	0	0.463918	0	0			81	102	93	97	98	144			in EWC
Chr 1	167164009	A	G	SNV	0	0	0	0.551724	0	0			68	55	60	58	61	69			in EWC
Chr 1	168035984	C	T	SNV	0	0	1	0	0	0			97	81	84	77	74	76			in EWC
Chr 1	168587134	AAGCAGCAGT	A	INDEL	0	0	0	0	0	0.536232			58	44	62	64	50	69			in EWC
Chr 1	170849808	A	C	SNV	0	0.012987	0	0	0	0.421569			73	77	74	98	80	102			in EWC
Chr 1	171777261	A	T	SNV	0	0	0	0	0.482143	0			76	103	97	101	112	110			in EWC
Chr 1	172100935	GTCAGCATGCATGTACATGATGGTATAGCCTTGCAGTA	G	INDEL	0	0	0	0	0.525424	0			69	73	80	82	59	69			in EWC
Chr 1	172558067	C	T	SNV	1	1	1	1	1	1			63	83	92	87	75	90			in EWC
Chr 1	173279315	T	C	SNV	0	0.522124	0	0	0	0			127	113	111	134	106	111			in EWC
Chr 1	176628234	A	ATAT	INDEL							0	0.990654							104	107	in EWC
Chr 1	177059191	G	C	SNV							1	0							118	104	in EWC
Chr 1	177289750	G	A	SNV							1	0							117	106	in EWC
Chr 1	180759059	T	G	SNV							0	1							93	104	in EWC
Chr 1	181205098	T	A	SNV	0	0	1	0	0	0			119	94	77	106	91	88			in EWC
Chr 1	181766194	C	T	SNV	0.494624	0	0	0	0	0			93	96	107	98	98	111			in EWC
Chr 1	182052120	A	G	SNV	0.988764	0	0	0	0	0			89	91	91	103	82	93			in EWC
Chr 1	182514456	G	T	SNV							0	0.988235							80	85	in EWC
Chr 1	183564454	C	T	SNV	0.00990099	0	0	0	0.43956	0			101	82	104	96	91	94			in EWC
Chr 1	183785293	A	G	SNV	0	0	0	0	0.469565	0			92	112	83	102	115	97			in EWC
Chr 1	183786921	C	T	SNV	1	0	0	0	0	0.0194175			121	111	131	112	120	103			in EWC
Chr 1	186735197	G	A	SNV	0	0	1	0	0	0			66	76	66	84	82	64			in EWC
Chr 1	189423788	A	C	SNV	1	0	0	0	0	0			90	88	97	91	108	77			in EWC
Chr 1	190017441	G	A	SNV	0.978495	0	0	0	0	0			93	105	111	91	98	97			in EWC
Chr 1	190548275	G	T	SNV	0.0119048	0	1	0	0	0			84	86	78	71	113	88			in EWC
Chr 1	190657654	A	G	SNV	0	0	0	1	0	0			52	48	71	61	74	57			in EWC
Chr 1	190691027	G	GGAGA	INDEL	0	0	0.490196	0	0	0			87	104	102	105	80	86			in EWC
Chr 1	190788443	C	T	SNV							0.481481	0							81	107	in EWC
Chr 1	191464354	G	A	SNV	0	0	1	0	0	0			93	85	105	104	100	90			in EWC
Chr 1	191615013	C	T	SNV	0.99	0	0	0	0	0			100	105	103	120	118	108			in EWC
Chr 1	192458180	C	T	SNV	0	1	0	0	0	1			72	67	90	63	70	77			in EWC
Chr 1	193847971	T	A	SNV	0	0	0	0.455357	0	0.00787402			107	96	82	112	101	127			in EWC
Chr 10	3934816	A	G	SNV	0.0117647	0	1	0	0	0			85	107	98	91	99	82			in EWC
Chr 10	4136197	A	C	SNV	0	1	0	0	0	1			73	86	88	74	65	66			in EWC
Chr 10	5766715	G	A	SNV	0	0	1	0	0	0			94	102	101	78	83	96			in EWC
Chr 10	6481458	A	C	SNV	0	0	0	0	0	0.598214			111	86	96	102	108	112			in EWC
Chr 10	6721368	T	G	SNV	0	0	0	0.00970874	1	0			70	88	100	103	103	78			in EWC
Chr 10	7600688	G	A	SNV	0	0	0	0.516484	0	0			78	82	111	91	91	91			in EWC
Chr 10	7742600	C	T	SNV	0	0	1	0	0	0			96	74	105	106	94	98			in EWC
Chr 10	7914444	T	A	SNV	0.010989	1	0	0	0	0			91	90	91	107	96	79			in EWC
Chr 10	8349896	G	T	SNV							0.54902	0							102	96	in EWC
Chr 10	11194289	C	T	SNV							0.508772	0							114	115	in EWC
Chr 10	12701289	A	C	SNV	0	0	0	0	1	0			78	92	87	88	95	81			in EWC
Chr 10	12722456	G	C	SNV							0	1							71	84	in EWC
Chr 10	15087691	A	G	SNV	0	0	0	1	0	0			63	86	83	77	75	69			in EWC
Chr 10	16136036	AGCTGTCTTTTGTGAGACTAG	A	INDEL							1	1							73	61	in EWC
Chr 10	16544393	A	G	SNV	0	0	0	0.631579	0	0			112	126	104	114	122	114			in EWC
Chr 10	16650637	G	A	SNV	1	0	0	0	0	0			65	74	72	78	73	91			in EWC
Chr 10	16780213	A	T	SNV							0.456311	0							103	125	in EWC
Chr 10	16885776	T	A	SNV							0	1							114	95	in EWC
Chr 10	17764803	C	CG	INDEL	0	0	0	1	0	0			76	90	109	101	96	80			in EWC
Chr 10	17998373	A	T	SNV	0	0	0	0	0	0.604396			63	109	100	103	105	91			in EWC
Chr 10	18358309	T	A	SNV	0	0	0	1	0	0			84	85	100	92	94	104			in EWC
Chr 10	19018996	G	A	SNV							0.495575	0							113	100	in EWC
Chr 10	20136247	G	T	SNV	0	0	1	0	0	0			83	90	77	103	76	90			in EWC
Chr 10	21810982	T	G	SNV	0	0	0	0	0	0.478261			78	96	97	96	99	69			in EWC
Chr 10	22035063	C	T	SNV	0	0	0.361111	0	0	0			72	79	72	61	83	84			in EWC
Chr 10	23081140	C	T	SNV	0	0	0	0	0.460317	0			106	111	110	122	126	105			in EWC
Chr 10	23679183	GA	G	INDEL	0	0	0	0	0	1			109	107	93	97	107	102			in EWC
Chr 10	26304656	C	A	SNV	0.0147059	0.0133333	0	0.0121951	0.561404	0			68	75	71	82	57	68			in EWC
Chr 10	27751697	A	G	SNV	0	0	1	0	0	0.0169492			78	93	73	83	81	59			in EWC
Chr 10	28123707	G	C	SNV	1	0	0	0	0	0			102	102	89	103	97	97			in EWC
Chr 10	28482235	A	G	SNV	0	0	1	0	0	0			82	101	79	109	108	86			in EWC
Chr 10	29724029	CGCCTCTCCAGGCACGCA	C	INDEL	0	0	0.397849	0	0	0			80	106	93	95	111	98			in EWC
Chr 10	30431974	C	T	SNV	1	0	0	0	0	0			76	92	99	98	82	81			in EWC
Chr 10	30491765	C	T	SNV	0	0	1	0	0	0			67	60	63	59	50	69			in EWC
Chr 10	30592310	T	C	SNV	0	0	0	1	0	0			70	78	75	79	82	72			in EWC
Chr 10	31183767	G	A	SNV	0	0	0	0	0.41129	0			78	85	131	86	124	74			in EWC
Chr 10	31807562	G	A	SNV	0	0.0120482	0	0.554054	0	0			86	83	70	74	77	94			in EWC
Chr 10	32403167	G	A	SNV	0.0114943	0	1	0	0	0			87	93	81	105	80	86			in EWC
Chr 10	33074160	G	A	SNV	0	0	0	0	0.526316	0			81	87	83	89	76	66			in EWC
Chr 10	33395612	T	A	SNV	0	0	0	0	0	0.445545			83	83	74	94	111	101			in EWC
Chr 10	34404837	C	T	SNV	0	0	0	0	0	0.454545			85	101	84	95	82	66			in EWC
Chr 10	34908111	G	T	SNV							0	1							92	79	in EWC
Chr 10	37559140	C	A	SNV	0	0	0	0	0.496183	0			98	107	113	129	131	103			in EWC
Chr 10	37983562	A	T	SNV	0	0	0	0	0	0.616071			106	103	110	112	81	112			in EWC
Chr 10	40601485	G	A	SNV	0	0	0	0	0.521739	0			64	95	82	103	92	96			in EWC
Chr 10	42491789	A	T	SNV	0	0	0.0104167	0	0.0104167	0.488372			84	84	96	112	96	86			in EWC
Chr 10	42686325	G	A	SNV	0	1	0	0.010101	0	1			70	69	88	99	78	90			in EWC
Chr 10	43547209	T	A	SNV	0	0	0	0	0	0.589744			80	54	71	83	77	78			in EWC
Chr 10	44604096	G	C	SNV	0	0	0	0.470085	0	0			105	96	98	117	110	116			in EWC
Chr 10	46766079	T	C	SNV							0.533981	0							103	90	in EWC
Chr 10	49024549	A	C	SNV	0	0	0.461538	0	0	0			100	107	78	125	85	88			in EWC
Chr 10	49863601	AG	A	INDEL	0	0	1	0	0	0			99	82	87	105	88	100			in EWC
Chr 10	50102144	T	C	SNV	0	0.545455	0	0	0	0			86	77	82	100	84	104			in EWC
Chr 10	50456343	G	A	SNV	0	0.00952381	0	0	0	1			98	105	97	116	103	124			in EWC
Chr 10	50556032	G	C	SNV	0	0.55	0	0	0	0			79	60	82	101	65	93			in EWC
Chr 10	51214995	C	T	SNV	0	0	0	0	0	0.463918			81	70	83	79	78	97			in EWC
Chr 10	51699955	G	C	SNV	0	0	0	1	0	0			90	117	116	115	121	109			in EWC
Chr 10	52484185	T	C	SNV	0.567568	0	0	0	0	0			111	97	94	100	113	93			in EWC
Chr 10	52812339	C	T	SNV	0	0	0.00840336	0	0.477064	0			101	106	119	131	109	105			in EWC
Chr 10	53970539	T	C	SNV	0	0	0	0.526786	0	0			102	111	100	112	111	92			in EWC
Chr 10	54462770	C	A	SNV	0	0	0.402299	0	0	0			90	79	87	111	84	91			in EWC
Chr 10	56225679	T	A	SNV	0	0	0.0108696	0	0	0.977011			80	78	92	77	79	87			in EWC
Chr 10	56484324	G	A	SNV	1	0	0	0	0	0			85	108	87	75	91	85			in EWC
Chr 10	56515583	C	G	SNV	0.011236	0	0	0	0	0.511905			89	91	71	97	81	84			in EWC
Chr 10	58821174	C	T	SNV	0	0	0.534884	0	0	0			67	99	86	79	89	83			in EWC
Chr 10	59671934	G	A	SNV	1	0	0	0	1	0.0106383			69	91	95	126	105	94			in EWC
Chr 10	61485395	C	A	SNV	0	0	0	0	0	1			85	94	91	91	85	88			in EWC
Chr 10	61828861	G	A	SNV	0	0	1	0	0	0			70	71	53	61	62	65			in EWC
Chr 10	61973159	C	T	SNV	0	0	0	0	0.493506	0			58	78	83	72	77	80			in EWC
Chr 10	62033712	G	A	SNV							0.518519	0							81	82	in EWC
Chr 10	62068412	C	T	SNV	0	0	0	0	0.490741	0			89	84	119	94	108	103			in EWC
Chr 10	63869015	A	C	SNV	0	0	0.5	0	0	0			91	84	84	95	102	83			in EWC
Chr 10	64601967	G	A	SNV	0	0	1	0	0	0			76	81	92	101	79	81			in EWC
Chr 10	64940032	T	C	SNV	0	0	0	0.0121951	0	1			72	79	76	82	79	89			in EWC
Chr 10	65441135	C	T	SNV	0.442308	0	0	0	0	0			52	63	68	59	65	54			in EWC
Chr 10	65912828	C	T	SNV	0	0	0.544304	0	0	0			98	88	79	98	102	102			in EWC
Chr 10	65998553	T	G	SNV	0.487179	0	0	0	0	0			78	74	92	97	95	91			in EWC
Chr 10	68130000	T	C	SNV	0	1	0	0	0	1			81	87	94	99	99	94			in EWC
Chr 10	68367620	C	A	SNV	0	0	0.613636	0	0	0			75	91	88	78	85	86			in EWC
Chr 10	68744488	T	G	SNV	0	0	0	0	0	1			73	76	81	83	85	86			in EWC
Chr 10	71975917	T	G	SNV	1	0.0102041	0	0	0	0			102	98	111	113	95	88			in EWC
Chr 10	72928420	C	A	SNV	0	0	0.0117647	0	0.0105263	0.530435			98	91	85	102	95	115			in EWC
Chr 10	74492272	A	G	SNV							1	0							104	107	in EWC
Chr 10	75118633	A	T	SNV	0	0	1	0	0	0			92	87	77	93	94	89			in EWC
Chr 10	75811830	T	G	SNV	0	0	1	0.00980392	0	0.0126582			108	98	97	102	106	79			in EWC
Chr 10	77073461	G	A	SNV	0	0	0	1	0	0			88	89	82	89	95	101			in EWC
Chr 10	78740234	A	T	SNV	0	0	0.581633	0	0.0105263	0			79	74	98	95	95	97			in EWC
Chr 10	79194204	T	C	SNV	0	0	0.421875	0	0	0			82	69	64	58	48	82			in EWC
Chr 10	80789277	GGGCATGT	G	INDEL	0	0	0	0	0	1			94	89	104	108	111	78			in EWC
Chr 10	81566306	C	T	SNV	0	0	0	0	1	0			79	100	127	91	80	91			in EWC
Chr 10	84236166	C	T	SNV	0	0	0	1	0	0			87	107	114	112	107	96			in EWC
Chr 10	84339063	C	CTCACCACACACT	INDEL	0	0.364706	0	0	0	0			87	85	89	88	96	94			in EWC
Chr 10	85475774	C	T	SNV	0	0	0	0.5	0	0			92	99	89	84	109	88			in EWC
Chr 10	85762959	CTA	C	INDEL	0	1	0	0	0	1			72	84	93	86	107	75			in EWC
Chr 10	86204086	C	A	SNV	0	0	0	0	1	0			73	104	102	100	104	85			in EWC
Chr 10	86227134	G	C	SNV							0	1							90	114	in EWC
Chr 10	86804344	C	A	SNV	1	0	0	0	0	0			82	64	67	76	65	74			in EWC
Chr 10	89253473	C	T	SNV							0	0.574713							95	87	in EWC
Chr 10	90166118	G	A	SNV							0	0.466667							104	105	in EWC
Chr 10	92147813	AT	A	INDEL	0	0	0.479167	0	0	0			95	97	96	127	108	94			in EWC
Chr 10	93070405	G	A	SNV	0	0	0	1	0	0			79	89	87	78	97	77			in EWC
Chr 10	93174344	A	T	SNV	0.547945	0	0	0	0	0			73	101	98	89	78	90			in EWC
Chr 10	93739832	A	C	SNV	0	1	0	0	0	0			83	98	99	67	91	86			in EWC
Chr 10	95398610	A	AGCG	INDEL	0	0	0	0	1	0			52	53	75	59	62	77			in EWC
Chr 10	96522913	C	A	SNV							1	0.0116279							97	86	in EWC
Chr 10	97297066	G	A	SNV	0	0	0	0	0	1			105	73	86	99	114	75			in EWC
Chr 10	97770574	TTACACAGTGGAGAAC	T	INDEL	0	0	0	0	0	0.42268			101	89	97	121	103	97			in EWC
Chr 10	100670809	G	A	SNV	0	0.428571	0	0.00980392	0	0			109	84	71	102	87	98			in EWC
Chr 10	102487568	G	A	SNV	0	0.514925	0	0	0	0			109	134	136	121	123	109			in EWC
Chr 10	103605212	G	T	SNV	0	0	0	0	0	0.523256			83	65	65	63	70	86			in EWC
Chr 10	105174314	C	T	SNV	0.488372	0	0	0	0	0			86	106	96	100	95	112			in EWC
Chr 10	105353554	C	T	SNV	0	0	0	0	0	0.555556			104	96	93	101	106	99			in EWC
Chr 10	106069864	C	T	SNV	0	0.402778	0.0117647	0	0	0			75	72	85	83	72	72			in EWC
Chr 10	106929760	C	T	SNV	0	0	0	0	0	0.576471			81	72	79	69	105	85			in EWC
Chr 10	107408445	A	G	SNV	0	0	0	0	0	1			79	75	78	91	100	76			in EWC
Chr 10	108223251	G	A	SNV							0	1							102	108	in EWC
Chr 10	109228669	TA	T	INDEL	0	0	0	0	0	0.53271			106	105	93	123	118	107			in EWC
Chr 10	109699587	TTCTATCTA	T,TTCTA	INDEL	0	0	0	1	0	0			70	71	58	60	74	51			in EWC
Chr 10	110326445	C	G	SNV	0	0	0	1	0	0			81	114	97	117	131	111			in EWC
Chr 10	110737306	C	T	SNV	0	0	0.421053	0	0	0			80	93	76	90	77	97			in EWC
Chr 10	110947332	TG	T	INDEL	0.5	0	0	0	0	0			102	110	105	108	100	121			in EWC
Chr 10	112458847	T	C	SNV	0	0.509434	0	0	0	0			92	106	124	114	146	117			in EWC
Chr 10	113663692	G	T	SNV	0	0.00970874	0.00980392	1	0	0			92	103	102	118	104	109			in EWC
Chr 10	114081751	T	C	SNV	0	0.00869565	1	0	0	0			103	115	102	124	108	119			in EWC
Chr 10	114139098	A	C	SNV	0	0	0	0	0	0.425532			88	96	110	94	91	94			in EWC
Chr 10	114298370	G	C	SNV	0	0	0	0	0.978261	0			96	91	121	116	92	77			in EWC
Chr 10	114434343	G	T	SNV	0.483871	0	0	0	0	0			62	79	64	90	86	82			in EWC
Chr 10	115864470	A	G	SNV	0	0	0	0	0	1			107	100	120	114	116	88			in EWC
Chr 10	116093686	C	T	SNV	0.5375	0	0	0.00900901	0	0.0128205			80	90	82	111	97	78			in EWC
Chr 10	116197558	C	T	SNV	1	0	0	0	0	0			87	88	83	72	82	84			in EWC
Chr 10	116781957	G	A	SNV	0	1	0	0.0103093	0	1			67	86	86	97	91	87			in EWC
Chr 10	117723940	G	A	SNV	1	0	0	1	1	0			82	54	85	85	74	71			in EWC
Chr 10	118198380	G	A	SNV	0	0.00980392	0	0	1	0			89	102	83	95	107	98			in EWC
Chr 10	118449244	A	C	SNV	0	0	0.0104167	0	1	0			87	88	96	101	100	103			in EWC
Chr 10	118549349	C	T	SNV	0.45	0	0	0	0	0			100	127	110	105	105	100			in EWC
Chr 10	119194330	A	T	SNV							1	0							108	87	in EWC
Chr 10	120858267	A	AT	INDEL	0	0.575342	0	0	0	0			104	73	109	100	84	80			in EWC
Chr 10	120977794	G	A	SNV	0	0	0	0	0	1			93	89	81	63	83	94			in EWC
Chr 10	122361211	C	T	SNV	0	0	0	0	0	1			94	111	99	109	103	112			in EWC
Chr 10	122532543	A	C	SNV	0.97619	0	0	0.0114943	0.96	0.015625			42	53	75	87	50	64			in EWC
Chr 10	123311908	C	T	SNV							0	0.491228							94	114	in EWC
Chr 10	125019750	A	T	SNV	0	0	1	0	0	0			121	124	103	129	132	103			in EWC
Chr 10	126143933	C	G	SNV	0	0	0	0	0	1			121	118	94	119	114	131			in EWC
Chr 10	126887850	C	T	SNV	0	0	0.554054	0	0	0			86	85	74	90	64	100			in EWC
Chr 10	129402086	T	C	SNV	0	0	0	1	0	0			97	116	112	110	94	88			in EWC
Chr 10	130543375	ACTG	A	INDEL	0	1	0	0	0	1			91	111	90	96	90	74			in EWC
Chr 10	130543605	C	T	SNV	0	0	0	0	0	1			94	102	98	115	97	92			in EWC
Chr 11	4906168	G	A	SNV	0	0	0	0	0	1			78	85	100	83	78	90			in EWC
Chr 11	6442197	T	G	SNV	0	0	1	0	0	0			93	100	120	106	83	118			in EWC
Chr 11	7566967	C	T	SNV	0.445783	0	0	0	0	0			83	109	101	126	116	94			in EWC
Chr 11	8059851	G	C	SNV	0	0	1	0	0	0			83	90	89	106	79	98			in EWC
Chr 11	8474110	A	C	SNV	0	0	0	1	0	0			89	101	102	108	103	82			in EWC
Chr 11	10246134	G	A	SNV	0.526316	0	0	0	0	0			76	81	82	71	100	89			in EWC
Chr 11	10611962	AAAGAACCC	A	INDEL	0	1	0	0	0	0			98	62	93	115	93	73			in EWC
Chr 11	11138427	A	T	SNV	0	0	0	0.530612	0	0			92	89	83	98	86	100			in EWC
Chr 11	13409917	T	C	SNV	0	0	1	0	0	0			81	112	116	142	131	97			in EWC
Chr 11	15273216	G	T	SNV	1	0	0	0	0	0			83	71	81	75	69	87			in EWC
Chr 11	15327818	A	G	SNV	0	0	0	0	0	1			86	81	107	102	106	101			in EWC
Chr 11	17888690	C	T	SNV	1	0	0.010989	0	0.0105263	0			89	93	91	129	95	111			in EWC
Chr 11	18067193	ATATCTATC	A,ATATC	INDEL	0	0	0	0	0.984127	0			60	63	51	95	63	66			in EWC
Chr 11	18319435	G	T	SNV	0	0	0	0	0	1			97	76	79	79	92	92			in EWC
Chr 11	19834420	G	A	SNV	1	0	0	0	1	0			81	94	79	97	71	112			in EWC
Chr 11	22154533	G	A	SNV	0	0	0	0	0	1			89	92	93	99	100	89			in EWC
Chr 11	22644998	G	T	SNV	0	0	0	0	0	1			108	116	109	92	93	106			in EWC
Chr 11	23881889	G	A	SNV	1	0	0	0	0	0			95	116	112	106	125	76			in EWC
Chr 11	24799891	TAGA	T	INDEL	0	0	0	0	1	0			97	76	87	90	81	94			in EWC
Chr 11	26050433	A	T	SNV							0.532468	0							77	82	in EWC
Chr 11	26237684	C	A	SNV	0	0	0	1	0	0			98	77	90	105	76	105			in EWC
Chr 11	27457826	G	A	SNV	0	0	0	0	0	1			84	95	94	94	87	96			in EWC
Chr 11	27520873	T	G	SNV	0.539326	0	0	0	0	0.0104167			89	102	93	113	112	96			in EWC
Chr 11	28327813	CTA	C	INDEL	0	0	1	0	0	0			86	81	89	113	104	99			in EWC
Chr 11	28655314	G	T	SNV	0	0	0	0	0.511111	0			82	96	90	90	90	96			in EWC
Chr 11	28983582	C	G	SNV	1	0	0	0	1	0			60	58	53	75	65	74			in EWC
Chr 11	29381519	C	A	SNV							1	0							94	117	in EWC
Chr 11	30079560	C	T	SNV	0	0	0	0	0	0.447368			81	73	81	74	60	76			in EWC
Chr 11	30633975	T	A	SNV	0	0.0123457	0	0	0	0.333333			87	81	79	94	84	75			in EWC
Chr 11	31665347	C	T	SNV	0	0	0	1	0	0			78	100	110	92	100	85			in EWC
Chr 11	31882367	A	AT	INDEL	0	0	0	0	0	1			109	100	99	102	128	112			in EWC
Chr 11	31936187	A	C	SNV	0.990476	0	0	0	1	0.00990099			105	126	100	130	129	101			in EWC
Chr 11	32778485	G	A	SNV	1	0	0	0	0	0			99	90	103	109	78	83			in EWC
Chr 11	33845873	C	A	SNV	0	0	0	0	0.515464	0			96	101	101	103	97	99			in EWC
Chr 11	35156546	C	T	SNV	0	0.518072	0	0	0	0			80	83	90	78	84	92			in EWC
Chr 11	35744097	T	C	SNV	0	0	0	0	1	0			96	129	119	92	81	97			in EWC
Chr 11	35782367	G	A	SNV	0	0	0.990654	0	0	0			90	115	107	90	126	94			in EWC
Chr 11	35789015	T	C	SNV	0	0	1	0	0	0			96	112	110	121	112	101			in EWC
Chr 11	35916355	A	C	SNV	0	0	0	1	0	0			85	85	98	98	103	79			in EWC
Chr 11	36573422	C	T	SNV	0	0	0	1	0	0			112	112	98	107	132	89			in EWC
Chr 11	36945146	C	A	SNV	1	0	0	0	0	0			66	83	82	65	91	71			in EWC
Chr 11	37124868	GGTTCAAGCATGA	G	INDEL	0	0	0.391304	0	0	0			68	90	69	70	80	79			in EWC
Chr 11	37181911	C	T	SNV	0	0.515152	0	0	0	0			96	99	101	128	137	116			in EWC
Chr 11	37808828	G	T	SNV	0	0	0	0	0.54918	0			109	132	103	125	122	115			in EWC
Chr 11	39316053	C	G	SNV	0	0.378641	0	0	0	0			111	103	102	121	97	91			in EWC
Chr 11	40025065	C	T	SNV							0	0.511811							123	127	in EWC
Chr 11	42000140	A	AATC	INDEL	0	0	0	1	0	0			65	67	67	61	81	63			in EWC
Chr 11	42328951	T	C	SNV	1	0	0.00952381	0	0	0			74	95	105	111	90	110			in EWC
Chr 11	44432732	G	A	SNV	0	0	0	0	0.393939	0			86	93	81	101	99	87			in EWC
Chr 11	47563086	C	T	SNV	0	0	0	0	1	0			109	96	100	102	141	89			in EWC
Chr 11	54889830	C	T	SNV	0	0.537634	0	0	0	0			96	93	100	108	89	88			in EWC
Chr 11	55051937	C	A	SNV	0	0	0	0	0	1			81	79	81	76	80	91			in EWC
Chr 11	55183868	C	A	SNV	0.515789	0	0	0	1	0			95	89	98	88	90	105			in EWC
Chr 11	55431115	G	A	SNV	0.466667	0	0	0	0	0			90	85	100	109	108	84			in EWC
Chr 11	55690510	TGGTAACTGTGACTATAAATTA	T	INDEL	0	0	0	0	0	1			112	124	109	95	107	84			in EWC
Chr 11	55859491	G	C	SNV	0	0	0	0	0.615385	0			68	83	79	79	65	61			in EWC
Chr 11	56087268	C	G	SNV	0	0	0	0	0.5625	0			87	98	73	103	80	94			in EWC
Chr 11	56570548	T	A	SNV	0.458824	0	0	0	0	0			85	77	72	72	91	81			in EWC
Chr 11	56837208	C	T	SNV							0.0126582	0.417722							79	79	in EWC
Chr 11	58844539	C	A	SNV	0	0.530973	0	0	0	0			87	113	99	106	111	71			in EWC
Chr 11	59802069	C	T	SNV	0	0.538462	0	0	0	0			91	78	95	75	91	91			in EWC
Chr 11	60467939	C	T	SNV	0	0	0	0	0	0.386667			70	79	108	70	60	75			in EWC
Chr 11	63248641	C	T	SNV							0.488095	0							84	97	in EWC
Chr 11	63411789	C	T	SNV	0	0	1	0	0	0			59	72	79	88	84	56			in EWC
Chr 11	64844544	G	A	SNV							0.413462	0							104	106	in EWC
Chr 11	65715799	G	A	SNV	0	1	0	0.00847458	0	1			110	116	99	118	124	107			in EWC
Chr 11	66251161	A	C	SNV	0	0	0	0	0.431373	0			97	75	96	98	102	97			in EWC
Chr 11	66540054	A	T	SNV							0.521277	0							94	74	in EWC
Chr 11	67040771	A	G	SNV							0	1							92	82	in EWC
Chr 11	67942632	C	T	SNV	0	0	0	1	0.0133333	0			83	71	81	84	75	73			in EWC
Chr 11	70529093	C	CTT	Multisite							0	0.52							93	100	in EWC
Chr 11	70529094	C	A	Multisite							0	0.52							93	100	in EWC
Chr 11	72621901	C	T	SNV	0	0	0	0	0	0.493506			79	81	68	81	64	77			in EWC
Chr 11	74174473	A	T	SNV	0	0	0	0	0.00943396	0.453782			88	75	87	97	106	119			in EWC
Chr 11	75215700	C	T	SNV	0	0.481928	0	0	0	0			101	83	96	87	81	86			in EWC
Chr 11	77955640	C	T	SNV	0.428571	0	0	0	0	0			63	83	84	78	93	63			in EWC
Chr 11	78023418	C	T	SNV	0.557143	0	0	0	0	0			70	78	84	80	83	83			in EWC
Chr 11	78612726	C	G	SNV	0	0	0	0	0	0.436364			109	99	103	125	127	110			in EWC
Chr 11	81581178	C	T	SNV	0.523364	0	0	0	0	0			107	91	106	117	102	88			in EWC
Chr 11	82926516	C	T	SNV							0.465116	0							86	84	in EWC
Chr 11	82935504	A	C	SNV	0.0151515	0.0215054	0.0107527	0.576923	0.012987	0.0131579			66	93	93	78	77	76			in EWC
Chr 11	84160068	C	T	SNV	0	0	0	0	1	0			80	82	86	89	97	91			in EWC
Chr 11	85381654	T	C	SNV	0	0	0	0.0142857	0	0.588235			61	72	79	70	72	68			in EWC
Chr 11	86079863	G	A	SNV	0.52809	0	0	0	0	0			89	92	103	91	83	82			in EWC
Chr 11	86614969	T	A	SNV	0	0	0	1	0	0			78	80	84	99	85	86			in EWC
Chr 11	86622619	G	A	SNV	0	0	0	1	0	0			101	105	126	129	114	106			in EWC
Chr 11	86810520	C	T	SNV							0.511111	0							90	90	in EWC
Chr 11	86832415	T	C	SNV							0.453608	0.0108696							97	92	in EWC
Chr 11	87423032	T	C	SNV							0	1							99	118	in EWC
Chr 11	90245336	T	A	SNV	0	0	0	0.00892857	0.990099	0			96	106	99	112	101	104			in EWC
Chr 11	91261253	G	T	SNV	0	0	0	0	0	1			102	105	103	97	101	86			in EWC
Chr 11	91548004	C	T	SNV							0.452632	0							95	112	in EWC
Chr 11	91759967	T	G	Multisite							0	0.5							65	76	in EWC
Chr 11	91759969	T	G	Multisite							0	0.518987							65	79	in EWC
Chr 11	92976107	G	A	SNV	0	0	0	0	0	1			87	91	86	97	116	95			in EWC
Chr 11	93121127	G	A	SNV	0	0	0	0	1	0			78	82	74	82	107	88			in EWC
Chr 11	93175561	G	A	SNV	0	0.9875	0	0.010989	0	1			80	80	72	91	60	74			in EWC
Chr 11	93808414	G	A	SNV	0	1	0	0	0	0			76	93	71	73	78	92			in EWC
Chr 11	95920532	G	A	SNV	0	0	0.540816	0	0	0			94	75	98	96	63	74			in EWC
Chr 11	98905218	C	A	SNV	0	0	0	0	0	0.535714			87	99	95	94	91	84			in EWC
Chr 11	100348945	C	T	SNV	0	0	0	0	0.589041	0			92	86	102	89	73	90			in EWC
Chr 11	100955708	C	G	SNV	0.526882	0	0	0	0	0			93	101	102	88	82	89			in EWC
Chr 11	102406743	T	G	SNV	0	1	0	0	0	1			105	70	89	93	90	95			in EWC
Chr 11	103417985	T	C	SNV	0.987805	0	0	1	0	0			82	92	95	105	77	92			in EWC
Chr 11	103863845	A	C	SNV	1	0	0	1	0.980198	0			70	83	105	85	101	88			in EWC
Chr 11	104290526	G	T	SNV	0	0	0	0	0	0.426829			82	82	96	95	97	82			in EWC
Chr 11	106352131	T	A	SNV	0.583333	0	0	0	0	0			48	49	90	59	59	57			in EWC
Chr 11	106414389	C	T	SNV	0	1	1	0	0	1			96	94	111	103	101	106			in EWC
Chr 11	106429325	C	CA	INDEL	0	0	0	0	1	0			75	87	83	100	103	89			in EWC
Chr 11	106765779	C	A	SNV	0.953125	0	0.025974	0.0298507	0	0.0307692			64	59	77	67	54	65			in EWC
Chr 11	107292320	G	A	SNV	0	0	0	0	1	0			93	91	84	81	101	122			in EWC
Chr 11	110625698	T	A	SNV	0	0	0	0.419355	0	0			78	80	77	62	68	55			in EWC
Chr 11	111212078	G	A	SNV	0.983607	0	0	1	1	0			61	77	80	85	74	89			in EWC
Chr 11	112604863	A	G	SNV	0	0	0	0	0	1			94	116	93	100	122	99			in EWC
Chr 11	114070354	C	A	SNV	0	0	0.565789	0	0	0			72	94	76	75	100	86			in EWC
Chr 11	117127356	C	T	SNV	0	0	0	0.435294	0	0			81	85	86	85	85	83			in EWC
Chr 11	117598145	C	T	SNV							0	1							71	71	in EWC
Chr 11	119056063	G	T	SNV	0	1	0	0	0	1			86	92	82	69	83	86			in EWC
Chr 11	119313207	T	G	SNV							0.486842	0.0138889							76	72	in EWC
Chr 11	119938470	C	T	SNV	0	0.554217	0	0	0	0.43617			93	83	83	73	92	94			in EWC
Chr 11	120220642	C	T	SNV	0	0	0	0	1	0			100	113	92	106	99	103			in EWC
Chr 11	120223703	C	T	SNV	0	0.481481	0	0	0	0			95	108	97	103	91	104			in EWC
Chr 11	120860498	C	T	SNV							0.55	0							100	95	in EWC
Chr 11	121704579	C	T	SNV	0	0	0.610526	0	0	0			102	101	95	79	110	81			in EWC
Chr 12	3016924	C	A	SNV	0	0	0.357576	0	0	0			124	141	165	140	130	154			in EWC
Chr 12	4821691	T	C	SNV	0	0	0	1	0	0			96	95	101	101	88	89			in EWC
Chr 12	5452644	C	T	SNV	0	0.548077	0	0	0.0104167	0			96	104	89	101	96	101			in EWC
Chr 12	5660809	C	T	SNV	0	1	1	0	0	0.983051			84	70	78	84	62	59			in EWC
Chr 12	7461932	G	T	SNV							0.375	0							64	84	in EWC
Chr 12	7951433	T	G	SNV	0	0	0	0	0.598131	0			128	99	93	105	107	123			in EWC
Chr 12	9068257	C	A	SNV	1	0	0	1	1	0			94	106	94	100	90	90			in EWC
Chr 12	10013085	A	T	SNV	0	0	0	0	0	1			77	73	87	98	92	82			in EWC
Chr 12	10024481	A	T	SNV	0	0.406593	0	0	0	0			74	91	97	100	86	117			in EWC
Chr 12	10183123	C	T	SNV	0	0	0	0.383562	0	0			84	93	104	73	90	81			in EWC
Chr 12	10601065	A	G	SNV	0	0	0.518868	0	0	0			79	99	106	85	102	86			in EWC
Chr 12	12059247	G	A	SNV							0.56383	0							94	96	in EWC
Chr 12	12375493	G	A	SNV							0	1							95	96	in EWC
Chr 12	12628534	T	C	SNV							0.541176	0.00961538							85	104	in EWC
Chr 12	14783986	G	T	SNV	0	0	0	0	0	1			98	85	75	108	90	84			in EWC
Chr 12	16168033	G	T	SNV							0	0.575342							77	73	in EWC
Chr 12	18142633	C	G	SNV	1	0	0	0	1	0			90	76	90	78	91	81			in EWC
Chr 12	24935281	G	T	SNV	0	0	0	0	1	0			67	87	113	100	101	89			in EWC
Chr 12	25410964	C	G	SNV							0.559322	0							59	94	in EWC
Chr 12	26230146	G	A	SNV	0	1	0	0	0	0.989247			99	109	123	110	107	93			in EWC
Chr 12	26806261	C	A	SNV	1	0	0	1	1	0			82	100	107	97	84	82			in EWC
Chr 12	28482451	G	A	SNV	0	0	1	0	0	0			99	95	98	78	80	107			in EWC
Chr 12	31116193	T	A	SNV	0	0	0	0	0	1			87	92	77	76	75	101			in EWC
Chr 12	32130196	CCTT	C	Multisite	0	0	1	0	0	0			97	96	96	96	129	99			in EWC
Chr 12	32130200	C	A	Multisite	0	0	1	0	0	0			97	98	96	95	129	97			in EWC
Chr 12	32178912	G	A	SNV	0	0	0	1	0	0.00943396			99	118	93	92	94	106			in EWC
Chr 12	33624556	T	A	SNV	1	0	0	0	0	0			97	126	103	98	126	105			in EWC
Chr 12	34295983	C	A	SNV	0	0	0	1	0	0			94	114	105	144	107	84			in EWC
Chr 12	34325788	T	C	SNV	0.48913	0	0	0.00819672	0	0			92	115	109	122	100	103			in EWC
Chr 12	34503590	G	T	Multisite	0	1	0	0	0	1			102	87	103	108	116	79			in EWC
Chr 12	34503591	G	T	Multisite	0	1	0	0	0	1			102	89	102	109	116	79			in EWC
Chr 12	35651237	T	A	SNV	0	0	1	0	1	0			100	96	109	123	107	123			in EWC
Chr 12	36432937	C	T	SNV	1	0	0	0	0.00900901	0			73	82	110	93	111	79			in EWC
Chr 12	36830707	C	T	SNV	0.508621	0	0	0	0	0			116	101	109	139	146	115			in EWC
Chr 12	37516784	A	C	SNV	1	0	0	0	0	0			70	86	65	108	103	114			in EWC
Chr 12	37924767	T	C	SNV							0	1							106	83	in EWC
Chr 12	38434639	C	T	SNV	1	0	0	0	0	0			90	118	108	135	102	90			in EWC
Chr 12	38608005	C	A	SNV	0	0	0	0	1	0			54	59	46	67	49	51			in EWC
Chr 12	40559177	A	G	SNV	0.00925926	0	0.490196	0	0	0			108	94	102	98	106	121			in EWC
Chr 12	43534396	C	A	SNV	0	0	1	0	0	0			62	108	35	94	75	74			in EWC
Chr 12	44660975	C	T	SNV	0	0	0.510417	0	0	0			79	82	96	100	87	104			in EWC
Chr 12	45317205	C	T	SNV	0.985507	0	0	0	0	0			69	79	98	75	90	75			in EWC
Chr 12	45726363	C	T	SNV	0	0	1	0	0	0			78	65	104	111	92	106			in EWC
Chr 12	47376240	G	C	SNV							0.514286	0							105	77	in EWC
Chr 12	47469909	T	A	SNV							0	1							108	98	in EWC
Chr 12	48012374	T	C	SNV	1	0	0.00884956	0	0	0			90	100	113	108	115	119			in EWC
Chr 12	48211832	G	A	SNV	0	0.481818	0	0	0	0.00925926			101	110	103	125	102	108			in EWC
Chr 12	48788845	G	T	SNV	0	0	1	0	0	0			84	86	105	114	105	115			in EWC
Chr 12	48800027	AT	A	INDEL	0	0	1	0	0	0			63	53	47	58	66	62			in EWC
Chr 12	49214698	A	G	SNV							1	0							93	91	in EWC
Chr 12	50628088	C	T	SNV	0	0	0	1	0	0			99	80	104	86	105	75			in EWC
Chr 12	50694247	G	A	SNV	0	0	0	0	1	0			89	78	77	95	87	80			in EWC
Chr 12	52834400	C	A	SNV	0	0	0	0	0	0.493827			81	99	111	96	106	81			in EWC
Chr 12	53146561	G	C	SNV	0	0	1	0	0	0.0192308			56	60	52	80	61	52			in EWC
Chr 12	53264871	A	T	SNV	0	0	0	0.529412	0	0			104	114	102	136	100	102			in EWC
Chr 12	55566727	C	G	SNV							0.476636	0							107	105	in EWC
Chr 12	56353373	A	G	SNV	0.359223	0	0	0	0	0			103	95	99	101	94	94			in EWC
Chr 12	57318741	C	A	SNV	0	0.012987	0	0	0	1			95	77	95	113	86	98			in EWC
Chr 12	57482350	A	G	SNV	0.0107527	0	0	0	0	1			93	104	101	86	94	109			in EWC
Chr 12	59068742	C	T	SNV	0	1	0	0	0	0			99	94	92	87	91	119			in EWC
Chr 12	61707258	T	C	SNV	1	0	0	0	0	0			75	69	75	78	73	66			in EWC
Chr 12	63318868	G	T	SNV	0	0	0	0	1	0			104	90	98	92	78	91			in EWC
Chr 12	63840379	T	C	SNV	0	0	1	0	0	0			60	56	77	80	75	66			in EWC
Chr 12	65491967	T	C	SNV	0	0	0	0	0.460674	0			72	109	93	123	89	105			in EWC
Chr 12	66118736	C	T	SNV	0.989899	0	0	0	0	0			99	98	100	101	110	95			in EWC
Chr 12	66385366	G	T	SNV	1	0	0	0	0	0			83	80	91	94	99	66			in EWC
Chr 12	68552758	T	C	SNV	0.462366	0	0	0	0	0			93	120	96	117	97	91			in EWC
Chr 12	70563837	C	A	SNV	0.0103093	0	1	0	0	0			97	91	102	97	99	63			in EWC
Chr 12	71085573	C	T	SNV	0	0	1	0	0	0			92	72	91	95	90	90			in EWC
Chr 12	73860166	C	A	SNV	0	0	0	0	1	0			127	128	119	142	126	97			in EWC
Chr 12	75510029	G	T	SNV	0	0	0	0.039604	0.0140845	0.983607			85	84	83	101	71	61			in EWC
Chr 12	78771311	T	G	SNV	0	0.985294	0.98	0	0	0.971014			72	68	50	67	69	69			in EWC
Chr 12	81223617	C	T	SNV	1	0	0	0.987342	1	0			72	92	94	79	100	65			in EWC
Chr 12	83776355	T	G	SNV	1	0	0	1	1	0			74	93	99	98	85	85			in EWC
Chr 12	84187992	G	GAGCACATGC	INDEL	0	0	0.452055	0	0	0			74	100	73	89	82	77			in EWC
Chr 12	86005362	G	C	SNV							0.510638	0							94	98	in EWC
Chr 12	86897635	C	A	SNV	1	0	0	0	0	0			55	92	95	79	88	79			in EWC
Chr 12	89310644	C	T	SNV							0.53211	0							109	106	in EWC
Chr 12	89664014	T	A	SNV	0	0	0.481013	0	0	0			101	98	79	102	111	85			in EWC
Chr 12	90532148	A	C	SNV	0	0	0	0	0	1			96	76	101	103	119	82			in EWC
Chr 12	92053645	C	T	SNV	0	0	0	0	1	0			117	119	112	138	116	108			in EWC
Chr 12	92509667	G	A	SNV	0	1	0	0	0	1			113	91	111	114	113	107			in EWC
Chr 12	93901856	T	G	SNV	0	0	0	0	0	1			111	101	131	102	139	107			in EWC
Chr 12	94485580	G	C	SNV	0	0.533333	0	0	0	0			69	90	92	88	84	87			in EWC
Chr 12	94633283	A	T	SNV	0	0	1	0	0	0			98	88	94	119	93	100			in EWC
Chr 12	95364356	G	C	SNV	0	0	0	1	0	0			86	83	97	79	88	80			in EWC
Chr 12	95714724	AGGCCTTT	A	INDEL	0	0	0	0	0	1			74	105	123	102	102	76			in EWC
Chr 12	96304874	T	C	SNV							0.434343	0							99	108	in EWC
Chr 12	96423388	CT	C	Multisite	0	0	1	0	0	0			62	68	90	90	75	82			in EWC
Chr 12	96423392	G	C	Multisite	0	0	1	0	0	0			62	70	91	91	76	82			in EWC
Chr 12	96526306	G	A	SNV							0	0.511628							114	86	in EWC
Chr 12	101887922	G	T	SNV	0	0	0	1	0	0			97	101	94	119	99	109			in EWC
Chr 12	102735935	C	A	SNV	0	0	0	1	0	0			89	96	116	110	114	101			in EWC
Chr 12	103721804	A	G	SNV							1	0							78	80	in EWC
Chr 12	104565163	C	T	SNV	1	0	0	1	1	0			98	108	102	111	104	103			in EWC
Chr 12	104707692	C	A	SNV	0	0	0	0	0.487603	0.010989			76	106	102	117	121	91			in EWC
Chr 12	104788472	G	A	SNV	0	0	0.479592	0	0	0			87	84	98	93	95	96			in EWC
Chr 12	105625022	G	A	SNV	0	0	0	0	0	0.52381			84	94	74	84	95	63			in EWC
Chr 12	107358917	C	T	SNV	0	0.486842	0	0	0	0			77	76	108	94	93	96			in EWC
Chr 12	107551728	A	C	SNV	0.0133333	0	0	0	0	1			75	79	90	82	86	87			in EWC
Chr 12	107703374	C	T	SNV	1	0	0	0	0	0.0120482			81	92	81	76	95	83			in EWC
Chr 12	110990598	C	A	SNV							0	0.514019							103	107	in EWC
Chr 12	113700287	G	A	SNV							0.53211	0							109	79	in EWC
Chr 12	114162624	G	T	SNV	0	0	0	0	0.443396	0			117	104	109	118	106	108			in EWC
Chr 12	114462305	G	A	SNV	0	0	0.426966	0	0	0			79	95	89	93	110	91			in EWC
Chr 12	115860753	G	A	SNV							0	0.566667							88	90	in EWC
Chr 12	116095365	T	C	SNV	0	0	0	1	0	0			87	124	86	91	97	98			in EWC
Chr 13	4534787	G	C	SNV	0	0	0	0	0	0.464789			61	73	92	64	80	71			in EWC
Chr 13	4682498	A	G	SNV	1	0	0.0111111	0	0	0			97	88	90	126	103	115			in EWC
Chr 13	6604232	C	G	SNV	0	0	0	0	0.5125	0			50	68	104	65	80	71			in EWC
Chr 13	6615511	G	C	Multisite	0	0	1	0	0	0			93	91	98	91	106	94			in EWC
Chr 13	6615512	G	T	Multisite	0	0	1	0	0	0			94	91	98	92	106	94			in EWC
Chr 13	6696330	C	A	SNV	1	0	0	0	0	0			60	52	61	60	54	53			in EWC
Chr 13	7370086	G	T	Multisite							0	0.505618							89	89	in EWC
Chr 13	7370087	G	T	Multisite							0	0.505618							90	89	in EWC
Chr 13	8586480	C	A	SNV	0.954545	0	0	0	1	0			66	63	59	56	66	46			in EWC
Chr 13	9082473	G	C	SNV	0.494737	0	0	0	0	0			95	79	111	75	99	87			in EWC
Chr 13	10757320	C	T	SNV	0.471264	0	0	0	0	0			87	113	94	107	97	115			in EWC
Chr 13	11349900	G	A	SNV	0	0	0	0	0	0.581395			75	95	93	94	87	86			in EWC
Chr 13	12018201	C	CA	INDEL	0	0	0.421687	0	0	0			75	90	83	77	97	72			in EWC
Chr 13	14280679	G	T	SNV							0	0.56701							113	97	in EWC
Chr 13	17505677	A	C	SNV							0	0.46988							104	83	in EWC
Chr 13	19116559	C	T	SNV	0.494845	0	0	0	0	0			97	91	88	145	98	106			in EWC
Chr 13	19404989	C	A	SNV	0	0	0	0	0	0.597938			100	99	119	106	125	97			in EWC
Chr 13	23760897	C	A	SNV	0	0	0	0	0	1			92	91	100	110	89	80			in EWC
Chr 13	25663619	G	T	SNV							0	0.533333							120	135	in EWC
Chr 13	26808224	T	G	SNV	0	0	0	0	0	0.928571			69	68	79	92	100	70			in EWC
Chr 13	27145947	C	T	SNV	0	0	0	0.00862069	1	0			107	95	108	116	100	108			in EWC
Chr 13	27392144	A	G	SNV	0	0	0	0	1	0			93	99	113	127	100	112			in EWC
Chr 13	28900159	A	C	SNV	0	0	0	0	0	1			91	112	112	113	92	86			in EWC
Chr 13	30732913	C	T	SNV	0	0	0	1	0	0			86	84	115	104	112	91			in EWC
Chr 13	32214541	TTATATTA	T	INDEL	0	0	0	0.555556	0	0			71	74	78	90	74	79			in EWC
Chr 13	33545990	G	A	SNV	0	0	0	0	0	0.986667			74	67	69	58	76	75			in EWC
Chr 13	35268159	C	T	SNV	0	0	1	0	0	0			62	91	66	85	74	85			in EWC
Chr 13	35390675	G	T	SNV	0	0	0	0	1	0			81	89	110	87	108	84			in EWC
Chr 13	38400213	C	T	SNV	0	0.51	0	0	0	0			107	100	118	92	108	87			in EWC
Chr 13	39868414	A	C	SNV	0	0	1	0	0	0			107	111	107	139	99	108			in EWC
Chr 13	40348646	TAGCCCGAGGCA	T	INDEL	0	0.444444	0	0	0	1			79	72	103	93	115	72			in EWC
Chr 13	41801368	C	T	Multisite	0	0	0.989011	0	0	0			71	84	91	69	83	90			in EWC
Chr 13	41801369	G	T	Multisite	0	0	0.989011	0	0	0			69	84	91	68	83	91			in EWC
Chr 13	42388122	A	C	SNV	0.0327869	0.0208333	0	0	1	0			61	96	68	65	57	77			in EWC
Chr 13	42610715	C	A	SNV	0	0.01	1	0	0	0	0.438596	0	61	100	63	73	83	71	57	80	in EWC
Chr 13	42949123	G	A	SNV	0	0	0.409639	0	0	0			93	122	83	91	133	66			in EWC
Chr 13	43717742	G	T	SNV	1	0	0	0	0	0.0113636			82	101	98	109	92	88			in EWC
Chr 13	45192374	C	G	SNV	0	0	0	1	0	0			60	73	68	67	70	69			in EWC
Chr 13	45755267	G	T	SNV	0.0375	0.0227273	1	0.0217391	0.0309278	0.0126582			80	88	68	92	97	79			in EWC
Chr 13	50177275	C	T	SNV	0	0.5625	0	0	0	0			86	96	103	106	104	111			in EWC
Chr 13	50220512	T	G	SNV	0	0	0	0	0	0.527473			76	100	97	97	115	91			in EWC
Chr 13	50950852	C	T	SNV							0	0.47619							75	84	in EWC
Chr 13	53898826	C	T	SNV	0	0	0	0	0	0.57971			78	78	74	85	83	69			in EWC
Chr 13	55440733	C	T	SNV	0	0	0.515152	0	0	0			102	105	99	98	80	94			in EWC
Chr 13	55600025	G	C	SNV							0	0.467391							82	92	in EWC
Chr 13	56626548	C	T	SNV	0	0.526316	0	0	0	0			74	114	109	88	108	94			in EWC
Chr 13	57373455	C	A	SNV	0	0	0	0	0	0.564706			71	79	102	88	82	85			in EWC
Chr 13	57767753	A	C	SNV	0	0	0	0	0	0.483871			65	84	73	86	82	62			in EWC
Chr 13	58271108	C	T	SNV	0	0	1	0	0	0			81	69	94	78	108	84			in EWC
Chr 13	58588256	G	A	SNV	0.0121951	0	0	0	0.584416	0			82	88	92	83	77	78			in EWC
Chr 13	59049499	G	A	SNV	0	0	0	0	0	0.626667			70	87	105	86	76	75			in EWC
Chr 13	59397958	T	C	SNV	0	0	0	1	0	0			83	83	103	106	83	99			in EWC
Chr 13	59905654	A	G	SNV	0	0	1	0	0	0			90	102	84	99	81	95			in EWC
Chr 13	63612901	G	A	SNV							0	0.3875							82	80	in EWC
Chr 13	63794975	C	A	SNV	0	0.541667	0	0	0	0			93	96	105	105	70	100			in EWC
Chr 13	64076498	T	G	SNV	0	0	0	1	0	0			92	71	82	93	91	62			in EWC
Chr 13	65312530	A	G	Multisite							0	0.470588							74	68	in EWC
Chr 13	65312531	A	G	Multisite							0	0.470588							75	68	in EWC
Chr 13	65660866	T	C	SNV							0.985294	0							68	66	in EWC
Chr 13	68150844	C	T	SNV							0.990741	1							108	117	in EWC
Chr 13	68157494	G	A	SNV	0	0	0	0	0	0.504348			103	93	88	120	96	115			in EWC
Chr 13	68310461	TTATC	T,TTATCTATC	INDEL							0.545455	0							66	56	in EWC
Chr 13	69881441	C	T	SNV							0	0.509804							62	102	in EWC
Chr 13	71575685	AATGTG	A	INDEL	0	0	1	0	0	0			104	107	83	129	96	106			in EWC
Chr 13	71648983	G	T	Multisite	1	0	0	0	0	0			81	115	97	118	115	86			in EWC
Chr 13	71648987	G	GA	Multisite	1	0	0	0	0	0			80	115	98	117	118	88			in EWC
Chr 13	71648992	G	T	Multisite	1	0	0	0	0	0			79	113	98	115	116	91			in EWC
Chr 13	71648993	A	T	Multisite	1	0	0	0	0	0			79	112	98	114	117	92			in EWC
Chr 13	72112923	G	A	SNV	0.0166667	0	1	0	0	0			60	78	83	66	68	68			in EWC
Chr 13	72424809	C	T	SNV	0	0	0	0	0	0.621951			77	112	104	76	79	82			in EWC
Chr 13	73924390	TA	T	INDEL	0	0	1	0	0	0			76	72	93	82	89	89			in EWC
Chr 13	74614788	C	T	SNV	0	0	0	1	0	0			58	89	82	110	59	83			in EWC
Chr 13	75733644	A	G	SNV	0.984375	0	0	0	0	0.0107527			64	101	91	100	87	93			in EWC
Chr 13	76259753	T	C	SNV	0	0.523256	0	0.0102041	0	0			91	86	96	98	107	88			in EWC
Chr 13	76489348	A	T	SNV	1	0	0	1	0	0			98	86	94	112	114	120			in EWC
Chr 13	77441865	G	A	SNV							0.585859	0							99	93	in EWC
Chr 13	77476116	A	C	SNV							0	0.603774							59	53	in EWC
Chr 13	77790474	G	C	SNV	0	0	0	0	0	0.587629			103	84	77	68	67	97			in EWC
Chr 13	79188169	A	C	SNV							0.504505	0							111	118	in EWC
Chr 13	79267657	AAAG	A	INDEL	0	0	0	0	0	0.468468			101	94	80	95	133	111			in EWC
Chr 13	80001223	A	G	SNV	1	0	0	0	0	0			103	106	90	96	108	120			in EWC
Chr 13	80263440	G	A	SNV	0	0	0	0	0	0.512195			113	85	83	113	97	82			in EWC
Chr 13	80546237	T	C	SNV	0	0.519608	0	0	0	0			110	102	115	112	113	103			in EWC
Chr 13	82156198	T	C	SNV	0	0.52439	0	0.00943396	0	0			84	82	101	106	78	93			in EWC
Chr 13	82366483	C	T	SNV	0	0	0	0	0	0.537736			86	98	96	105	111	106			in EWC
Chr 13	83978093	C	T	SNV	1	0	0	1	1	0			87	99	113	98	116	102			in EWC
Chr 13	84870640	T	G	SNV	0	0	0	1	0	0			92	66	92	74	83	64			in EWC
Chr 13	85339179	G	A	SNV	0	0.480769	0	0	0	0			123	104	99	108	85	90			in EWC
Chr 13	85455669	C	T	SNV	1	0	0	0	0	0			99	80	66	87	84	94			in EWC
Chr 13	85813917	C	T	SNV							0.558559	0							111	117	in EWC
Chr 13	86410442	G	T	SNV	0	0	0	0	0	0.394366			74	84	79	95	95	71			in EWC
Chr 13	87135665	C	A	SNV	0	0	0	1	0	0			91	70	113	110	85	121			in EWC
Chr 13	87471273	C	T	SNV	0.549451	0	0	0	0	0			91	98	92	103	107	122			in EWC
Chr 13	88335824	A	C	SNV	1	0	0	1	1	0			62	63	67	68	57	73			in EWC
Chr 13	88381343	T	G	SNV	1	0	0	0.988235	1	0			91	82	78	85	86	87			in EWC
Chr 13	89582644	CTCTA	C	INDEL	0	0.505618	1	0	0	0			93	89	93	103	110	71			in EWC
Chr 13	89620619	G	T	SNV	0.00990099	0	1	0	0	0			101	102	109	109	113	90			in EWC
Chr 13	89698223	G	A	SNV	0	0	0	0.00877193	1	0			74	90	107	114	121	50			in EWC
Chr 13	90358072	G	A	SNV	0	0.505051	0	0	0	0			70	99	92	89	125	88			in EWC
Chr 13	92312510	T	C	SNV							0.541667	0.0126582							96	79	in EWC
Chr 13	92778999	T	A	SNV							0	0.53271							99	107	in EWC
Chr 13	93125442	CTGAAG	C	INDEL	0	0.451327	0	0	0	0			115	113	113	133	105	122			in EWC
Chr 13	94623036	A	G	SNV	0	0	1	0	0	0			78	84	90	97	86	84			in EWC
Chr 13	95034374	G	C	SNV	0	0	0	1	0	0			98	91	114	100	101	104			in EWC
Chr 13	95213589	G	A	SNV	0	0	0	0	0.47191	0			71	82	77	88	89	82			in EWC
Chr 13	95344460	G	A	SNV	1	0	0	0	0.011236	0			89	79	102	87	89	67			in EWC
Chr 13	95354397	C	T	SNV	0	0	0	0.540984	0	0			79	114	116	122	104	93			in EWC
Chr 13	95900152	G	A	SNV	0	0	0	0	0	0.488095			89	94	94	87	81	84			in EWC
Chr 13	97723409	C	A	SNV							0.0294118	0.946429							68	56	in EWC
Chr 13	98726073	G	A	SNV	0	0	0	0	0.330189	0			101	83	94	82	106	92			in EWC
Chr 13	99432192	G	A	SNV	1	0	0	1	0	0			88	99	88	114	112	81			in EWC
Chr 13	100717494	C	T	SNV							0	0.494382							69	89	in EWC
Chr 13	101007950	T	G	SNV	0	0	0	0	0	0.434211			72	112	92	96	84	76			in EWC
Chr 13	101553614	G	A	SNV	0	0	0	0.992126	0	0			100	115	122	127	120	102			in EWC
Chr 13	102070282	C	A	SNV							0	0.484211							103	95	in EWC
Chr 13	102323297	C	A	SNV	0	0.00943396	1	0	0	0			101	106	98	118	104	103			in EWC
Chr 13	103268896	C	G	SNV	0	0	0	0	0	0.534884			101	106	114	125	117	86			in EWC
Chr 13	104365014	C	T	SNV	0	0	0	0.492308	0	0			104	99	127	130	115	105			in EWC
Chr 13	105502459	G	A	SNV	0	0	0	0	0	0.516129			92	91	101	92	83	93			in EWC
Chr 13	106020294	T	G	SNV							0.464286	0							84	81	in EWC
Chr 13	106227094	C	G	SNV	0	0	0.402062	0	0	0			89	91	97	95	89	91			in EWC
Chr 13	106482695	G	A	SNV	0	0	1	0	0	0			70	99	109	111	89	91			in EWC
Chr 13	107367725	G	A	SNV	0	0	0	0	0	0.477477			82	94	81	109	93	111			in EWC
Chr 13	107766714	C	CT	INDEL	0	0	0	1	1	0			71	96	86	87	93	88			in EWC
Chr 13	108287731	G	T	SNV	0	0	0	0	0	0.515464			106	88	91	95	102	97			in EWC
Chr 13	110134654	T	C	SNV	0	1	1	0	0	1			98	114	107	103	117	117			in EWC
Chr 13	110579391	G	A	SNV	0	0	0	0	0	0.52381			89	103	89	118	114	105			in EWC
Chr 13	110879450	G	A	SNV	0.480769	0	0	0	0	0			104	123	144	146	142	112			in EWC
Chr 13	111257135	C	T	SNV	1	0	0	0	0	0			115	108	122	112	89	104			in EWC
Chr 13	111763004	C	T	SNV	0	0	1	0	0	0			81	96	97	107	109	97			in EWC
Chr 13	113751675	GCAATA	G	INDEL	0	0	0.5	0	0	0			63	66	84	74	81	75			in EWC
Chr 13	116214725	C	A	SNV							0.389474	0							95	86	in EWC
Chr 13	118000017	G	A	SNV	0.484848	0	0	0	0	0			99	99	122	108	113	108			in EWC
Chr 13	118672638	C	T	SNV	0	0	0	1	0	0			91	129	107	133	134	82			in EWC
Chr 13	119912576	C	T	SNV	0	0.440476	0	0	0	0			97	84	110	101	92	98			in EWC
Chr 14	8172420	G	T	SNV	0	0	0	0.448598	0	0			93	80	99	107	92	96			in EWC
Chr 14	10357383	G	C	SNV	0	0	0	0	1	0.011236			85	106	90	113	93	89			in EWC
Chr 14	12183063	G	A	SNV	0	0	1	0.00833333	0	0			94	103	115	120	119	93			in EWC
Chr 14	12390293	C	T	SNV							0	1							94	108	in EWC
Chr 14	12941481	G	A	SNV	0.546667	0	0	0	0	0			75	83	85	94	84	80			in EWC
Chr 14	13346175	C	T	SNV	0	0	1	0	0	0			69	108	101	106	108	97			in EWC
Chr 14	15398251	G	A	SNV	0	0	1	0	0	0			106	101	92	108	103	98			in EWC
Chr 14	16246888	C	T	SNV	0	0	1	0	0	0			90	84	96	88	86	96			in EWC
Chr 14	16639411	A	G	SNV	0	0.422535	0	0	0	0			83	71	84	63	59	79			in EWC
Chr 14	19720919	C	T	SNV	0	0	0.556962	0	0	0			102	75	79	100	86	87			in EWC
Chr 14	26706824	G	A	SNV	0	0	0	0.479167	0	0			95	81	93	96	103	114			in EWC
Chr 14	27737502	A	C	SNV							1	0.566667							99	90	in EWC
Chr 14	29006015	T	G	SNV	0	0	0.520408	0	0	0			73	101	98	97	78	96			in EWC
Chr 14	29578422	CTTGAAGCAAAAAGGAAGACAGGAAT	C	INDEL	0	0.987342	1	0	0	1			91	79	75	111	108	69			in EWC
Chr 14	33174181	C	T	SNV	0	0	0	0	1	0			92	75	88	116	93	92			in EWC
Chr 14	33894266	G	A	SNV	0	0	0	1	0	0			80	93	96	84	93	96			in EWC
Chr 14	34734677	A	G	SNV	1	0	0	0	0	0			100	127	114	124	121	105			in EWC
Chr 14	35054321	T	C	SNV	0	0	0	0.988764	0	0			68	82	92	89	113	73			in EWC
Chr 14	36107037	T	C	SNV	0	0	0	0	1	0			80	101	87	80	78	90			in EWC
Chr 14	38837839	C	T	SNV							0.5	0							76	102	in EWC
Chr 14	39688348	C	A	SNV	0	0	1	0	0	0			65	82	71	90	79	82			in EWC
Chr 14	39860575	T	C	SNV	0	0	0	0.00826446	1	0			101	101	106	121	99	112			in EWC
Chr 14	41214377	C	T	SNV	0	0	0	0.489362	0	0			98	116	112	94	91	94			in EWC
Chr 14	44622304	G	T	SNV	0.5	0	0	0	0	0			80	90	102	95	81	92			in EWC
Chr 14	45821422	G	A	SNV	0	0	0	0	0.495575	0			88	105	88	103	113	96			in EWC
Chr 14	49095063	C	T	SNV	0	0	0.44898	0	0	0			112	93	98	99	102	91			in EWC
Chr 14	50501118	C	A	SNV	1	0	0	1	1	0			92	79	80	102	89	89			in EWC
Chr 14	50872220	T	G	SNV	0	0	0.0108696	0	0	0.4			91	96	92	103	84	80			in EWC
Chr 14	50933831	C	T	SNV	0	0.62766	0	0	0	0			105	94	98	102	86	108			in EWC
Chr 14	50935680	G	T	SNV	0	0	0	0.576923	0	0			105	75	121	78	84	89			in EWC
Chr 14	51811616	G	A	SNV	0.519608	0	0	0	0	0.0111111			102	115	85	100	96	90			in EWC
Chr 14	51905534	C	T	SNV	1	0	0	0	0	0.0212766			77	80	57	58	76	47			in EWC
Chr 14	52363635	G	A	SNV	0.468354	0	0.0108696	0	0	0			79	89	92	87	83	107			in EWC
Chr 14	54929307	C	A	SNV							0	0.630137							91	73	in EWC
Chr 14	56398691	A	G	SNV	0	0	0	0	1	0			80	91	108	108	102	105			in EWC
Chr 14	57439320	G	A	SNV							0.991525	0							118	106	in EWC
Chr 14	57701454	T	A	SNV	0.5	0	0	0	0	0			70	46	65	76	72	52			in EWC
Chr 14	58287510	C	T	SNV	0.0131579	0	0	0	0	1			76	88	84	68	61	65			in EWC
Chr 14	61621626	T	C	SNV							0.509091	0							110	106	in EWC
Chr 14	62227287	G	A	SNV	0.415584	0	0	0	0	0			77	99	104	91	93	82			in EWC
Chr 14	63004653	C	T	SNV	0	1	0	0	0	1			82	78	67	81	87	87			in EWC
Chr 14	63211578	G	A	SNV	0	0	0	0.488889	0	0			102	106	84	90	89	102			in EWC
Chr 14	64276123	G	A	SNV	0.43038	0	0	0	0	0			79	94	105	97	84	82			in EWC
Chr 14	65264210	C	T	SNV	0	1	0	0	0	0			80	92	102	102	90	82			in EWC
Chr 14	65726748	G	C	SNV	0	0	0	0	1	0			92	85	92	80	88	114			in EWC
Chr 14	67986775	G	A	SNV	0.549296	0.0131579	0	0	0	0			71	76	72	83	78	76			in EWC
Chr 14	68343815	T	C	SNV	1	0	0	0	0	0			102	92	96	110	94	111			in EWC
Chr 14	70679080	G	A	SNV	0	0	0	0.401961	0	0			97	102	89	102	93	80			in EWC
Chr 14	70949513	G	A	SNV							0	0.405405							97	111	in EWC
Chr 14	70952327	G	A	SNV	0	0	1	0	0	0			75	86	94	75	96	65			in EWC
Chr 14	71782772	A	T	SNV	0	1	0	0	0	1			89	69	63	67	70	75			in EWC
Chr 14	71795910	G	A	SNV	0	0	0	0	0	1			80	102	105	72	78	92			in EWC
Chr 14	71893987	C	T	SNV	0	0	1	0.00854701	0	0			90	97	94	117	92	71			in EWC
Chr 14	72062727	A	C	SNV							0	0.47561							92	82	in EWC
Chr 14	76542205	C	A	SNV	0	0	0	0.989474	0	0			88	93	85	95	77	81			in EWC
Chr 14	76558675	TGTGTCGTTC	T	INDEL	0	0	0	0.473684	0	0			76	77	86	76	80	75			in EWC
Chr 14	77156953	G	T	SNV	0	0	0	1	0	0			87	117	87	81	112	111			in EWC
Chr 14	78128549	T	C	SNV	0	0	1	0	0	0			89	101	130	143	125	108			in EWC
Chr 14	80861093	T	G	SNV	1	0	0	0	1	0			96	97	97	125	81	88			in EWC
Chr 14	82166448	G	A	SNV	0.388889	0	0	0	0	0			108	96	108	91	104	97			in EWC
Chr 14	82744633	G	T	SNV	0	0	0	1	0	0			74	75	74	98	87	78			in EWC
Chr 14	84347075	T	A	SNV	1	1	1	1	1	1			88	100	76	94	92	90			in EWC
Chr 14	85678033	T	A	SNV	0.00909091	0	0	0	0.464646	0			110	80	104	114	99	102			in EWC
Chr 14	85966994	C	T	SNV							0	0.525253							104	99	in EWC
Chr 14	85974926	C	A	SNV	0.0166667	0	1	0	0	0			60	72	80	61	74	66			in EWC
Chr 14	86081635	C	T	SNV							0	0.556701							121	97	in EWC
Chr 14	86434170	G	A	SNV	0	0	0	0	1	0			91	79	82	75	86	76			in EWC
Chr 14	87839783	T	C	SNV	0	0	0	0	0	1			84	70	81	76	54	62			in EWC
Chr 14	89407478	T	C	SNV	0.448276	0	0	0	0	0			87	92	104	101	118	95			in EWC
Chr 14	89428480	A	T	SNV	0.0123457	0	0.984848	0	0	0			81	74	66	82	85	89			in EWC
Chr 14	89590283	C	T	SNV	0	0.0144928	0	0	0	1			74	69	82	75	77	68			in EWC
Chr 14	90070955	C	A	SNV	0	1	0	0	0.01	0			87	73	99	98	100	105			in EWC
Chr 14	90654829	G	C	SNV	0	0	0	0	0	1			99	93	94	105	116	93			in EWC
Chr 14	90868580	C	T	SNV	0.987654	0	0	0.0078125	0	0			81	94	96	128	110	96			in EWC
Chr 14	91065145	T	G	SNV	0	0	0	0.456897	0	0			137	105	98	116	117	121			in EWC
Chr 14	91071516	C	A	SNV	0	0	1	0	0	0			82	97	79	104	96	88			in EWC
Chr 14	92348013	G	A	SNV	1	0	0	0	0	0			82	113	79	83	78	90			in EWC
Chr 14	93485850	G	T	SNV	0	0	0	0	1	0			94	95	110	130	121	104			in EWC
Chr 14	93834382	C	T	SNV	0	0	1	0	0	0			98	97	99	94	115	104			in EWC
Chr 14	94139689	C	A	SNV	1	0	0	0	1	0			84	80	104	96	99	111			in EWC
Chr 14	94543697	G	A	SNV	0	0	0	0	0	0.99			99	128	89	105	109	100			in EWC
Chr 14	94606380	G	T	SNV	0	0	1	0	0	0.0123457			95	70	85	90	101	81			in EWC
Chr 14	95627675	C	T	SNV	0.527778	0	0	0	0	0			108	103	110	131	97	110			in EWC
Chr 14	96276090	T	A	SNV	0	0	0	1	0	0			70	71	72	90	94	82			in EWC
Chr 14	98319871	AC	A	INDEL	0	0	0	1	0	0			104	104	104	116	80	105			in EWC
Chr 14	99695840	A	G	SNV	0	1	0	0.00980392	0	1			91	77	91	102	94	90			in EWC
Chr 14	99824667	G	C	SNV	0.0125	1	0	0	0	1			80	106	108	104	110	117			in EWC
Chr 14	100185790	G	C	SNV							0.5	0							92	104	in EWC
Chr 14	100715916	C	A	SNV	0	0	1	0	0	0			106	93	86	95	116	93			in EWC
Chr 14	101555888	G	A	SNV							0	0.45283							110	106	in EWC
Chr 14	103026987	T	TACATAC,TACATACACATAC	INDEL	0	1	1	0	0	0.981481			59	42	52	82	63	54			in EWC
Chr 14	104614923	C	T	SNV	1	0.0116279	0	0	0	0			89	86	83	104	99	107			in EWC
Chr 14	105726722	T	A	SNV	0	1	0	0	0	1			85	104	121	101	105	90			in EWC
Chr 14	105787499	A	G	SNV	0	0	0	1	0	0			73	75	96	86	86	69			in EWC
Chr 14	107673585	T	G	SNV							0	0.477273							86	88	in EWC
Chr 14	108979463	T	C	SNV	0	0	0.515464	0	0	0			86	122	97	131	120	107			in EWC
Chr 14	109470614	C	T	SNV	0	0	0.566372	0	0	0			121	120	113	140	108	91			in EWC
Chr 14	109498010	G	A	SNV	0	0	0	0	0	0.512195			101	83	88	126	95	123			in EWC
Chr 14	111679758	C	T	SNV	0	1	0	0	0	0.990291			92	99	93	112	122	103			in EWC
Chr 14	112283391	G	C	SNV	0	0	0	0	0.445652	0			84	86	97	100	92	88			in EWC
Chr 14	113111624	TTTCCTCTCCCCTTTCTCCG	T	INDEL	0	0	0.444444	0	0	0			79	82	63	83	92	75			in EWC
Chr 14	113207470	C	G	SNV	0	0	0	1	1	0.0114943			111	95	90	116	103	87			in EWC
Chr 14	113457754	T	G	SNV	0	0	0	1	0	0			102	88	81	97	122	94			in EWC
Chr 14	113476085	C	G	SNV	0	0.00961538	0	0	0.438095	0			85	104	98	112	105	93			in EWC
Chr 14	113568015	C	T	SNV							0	0.453704							112	108	in EWC
Chr 14	114684793	C	A	SNV	0	1	0	0	0.0166667	0.964286			61	48	59	75	60	56			in EWC
Chr 14	114684795	A	C	SNV	0.0163934	0	0.425532	0	0	0			61	70	47	73	60	67			in EWC
Chr 14	115075236	A	G	SNV	0.494253	0	0	0	0	0			87	128	115	119	124	109			in EWC
Chr 14	116358366	C	T	SNV	1	0	0	0	0	0			76	96	87	108	113	78			in EWC
Chr 14	121022728	C	T	SNV							0	0.462264							81	106	in EWC
Chr 14	121244503	C	G	SNV	0	0	0	0	0	0.57			97	98	103	89	100	100			in EWC
Chr 14	121535701	C	T	SNV							0	0.594059							105	101	in EWC
Chr 14	122465217	G	T	SNV	0	0.0131579	0	0.65	0	0			86	76	84	80	92	72			in EWC
Chr 14	124388555	CATAG	C,CATAGATAG	INDEL	0	0.0289855	0	0	0	0.545455			52	69	54	47	44	44			in EWC
Chr 14	124586829	G	A	SNV	0	0	0	0	1	0			78	87	107	103	112	115			in EWC
Chr 15	3381522	A	G	SNV	0	0	0	0	0.5	0			78	107	88	136	108	98			in EWC
Chr 15	5895222	T	A	SNV							0	0.436893							99	103	in EWC
Chr 15	6206382	G	T	SNV							0.513761	0							109	103	in EWC
Chr 15	6431249	C	T	SNV							0	0.505051							105	99	in EWC
Chr 15	8422975	A	G	SNV	0	0	1	0	0	0			92	98	93	89	93	104			in EWC
Chr 15	8961138	A	C	SNV	0.0123457	0	0	0.457944	0	0			81	94	84	107	94	99			in EWC
Chr 15	10017797	G	C	SNV	0	0	0	0	0.483871	0			92	106	112	117	93	90			in EWC
Chr 15	11477707	C	A	SNV	0	0	0	1	0	0			94	91	89	102	98	90			in EWC
Chr 15	12105659	T	G	SNV	0	0	0	0	0.96	0			72	76	75	71	75	82			in EWC
Chr 15	12477046	G	A	SNV	0	0	0	0.494845	0	0			102	99	108	97	95	102			in EWC
Chr 15	13493018	C	A	SNV	0.467391	0	0	0	0	0			92	119	112	102	113	100			in EWC
Chr 15	13537337	A	G	SNV	0.531915	0	0	0	0	0			94	111	85	95	92	73			in EWC
Chr 15	13795681	T	C	SNV	0	0.861111	0	0	0.0102041	0.4375			68	72	60	107	98	64			in EWC
Chr 15	14502928	C	A	SNV	0	0	0	0	0.634146	0			89	84	77	97	82	91			in EWC
Chr 15	14811178	G	T	SNV	0.0126582	0	0	0	0.540816	0			79	106	94	119	98	107			in EWC
Chr 15	15491969	G	C	SNV	0	0	0.549451	0	0	0			88	82	91	75	76	75			in EWC
Chr 15	15885285	GCGAATGCATA	G	INDEL	0	0	0	0	0	0.478261			68	88	80	75	71	69			in EWC
Chr 15	16122032	C	T	SNV	0	0	0	0	0	0.575342			90	63	90	90	101	73			in EWC
Chr 15	16370201	C	T	SNV							0.522523	0							111	127	in EWC
Chr 15	16586556	G	T	SNV	0	0	0	0	1	0			113	90	109	98	129	123			in EWC
Chr 15	18061852	G	A	SNV	0.414894	0	0	0	0	0			94	97	88	101	94	98			in EWC
Chr 15	18922273	G	A	SNV	0	0	0.5	0	0	0			57	78	76	91	95	77			in EWC
Chr 15	20288494	T	A	SNV	0	0	0	0	1	0			85	84	88	68	93	91			in EWC
Chr 15	22435978	AT	A	INDEL	0.00934579	0	0	0	0	0.490566			107	109	98	114	112	106			in EWC
Chr 15	23676318	T	G	SNV	0	0	0	0	0	0.333333			72	83	79	73	88	48			in EWC
Chr 15	24013773	T	C	SNV	1	0	0	0	0	0.0119048			74	95	79	104	106	84			in EWC
Chr 15	24991275	A	C	SNV							0	0.488889							98	90	in EWC
Chr 15	28838503	T	C	SNV	1	0.00952381	0	1	0	0			103	105	96	91	130	103			in EWC
Chr 15	29005960	A	C	SNV	0.333333	0.0113636	0	0	0.0123457	0			81	88	82	87	81	70			in EWC
Chr 15	31987458	GAGA	G	INDEL							0	1							102	115	in EWC
Chr 15	32340680	T	C	SNV	0	0	0	0	0	0.453704			78	120	91	141	116	108			in EWC
Chr 15	33079569	C	T	SNV	1	0	0	0	0	0			70	88	82	82	97	57			in EWC
Chr 15	33143422	G	A	SNV	0	0	0	1	0	0			115	73	89	112	94	112			in EWC
Chr 15	33930595	G	A	SNV	0.493151	0	0	0	0	0.0111111			73	91	76	90	76	90			in EWC
Chr 15	34309477	A	G	SNV	0	0.372093	0	0	0	0			72	86	77	71	90	77			in EWC
Chr 15	34503014	C	A	SNV	0.015873	0	0.548387	0.0151515	0	0.0114943			63	65	62	66	81	87			in EWC
Chr 15	36061155	G	A	SNV	0	0.533333	0	0	0	0			80	120	92	105	107	125			in EWC
Chr 15	37478353	T	G	SNV	0	0	0	1	0	0			94	98	84	88	69	81			in EWC
Chr 15	41354477	A	T	Multisite	0	0	0	0.386667	0	0			62	71	91	75	80	71			in EWC
Chr 15	41354478	C	T	Multisite	0	0	0	0.386667	0	0			62	72	92	75	80	71			in EWC
Chr 15	42032744	T	A	SNV	0	0	0	0	0.553846	0			64	57	74	62	65	62			in EWC
Chr 15	43092044	T	C	SNV	0.420561	0	0	0	0	0			107	109	108	134	120	123			in EWC
Chr 15	43483747	T	A	SNV	0.567901	0	0	0	0	0			81	64	92	91	89	87			in EWC
Chr 15	45003697	G	A	SNV	0	0.518987	0	0	0	0			94	79	72	81	87	91			in EWC
Chr 15	46066907	C	T	SNV	0	0	0	0	1	0.00787402			84	119	121	120	105	127			in EWC
Chr 15	46136835	TGTGCTTA	T	INDEL	0	0.597403	0	0	0	0			89	77	98	95	98	94			in EWC
Chr 15	46170136	T	A	SNV	0	0	0	0.484211	0	0			72	97	88	95	92	97			in EWC
Chr 15	46987393	T	A	SNV	0	0	0	0	0.505495	0			91	79	89	94	91	100			in EWC
Chr 15	47012787	A	T	SNV	0	0	0.515789	0	0	0			81	88	95	102	85	114			in EWC
Chr 15	49031588	G	T	SNV							0.513761	0.00854701							109	117	in EWC
Chr 15	49514079	C	A	SNV	0	0	0	0.59322	0	0			88	81	100	118	94	86			in EWC
Chr 15	49949827	A	T	SNV							0.989011	0							91	92	in EWC
Chr 15	51024689	T	A	SNV	0.402174	0	0	0	0	0			92	79	100	138	113	108			in EWC
Chr 15	51457006	G	A	SNV	0	0	0.542056	0	0	0			93	103	107	126	100	88			in EWC
Chr 15	53898550	A	G	SNV	0.523256	0	0	0	0	0			86	106	96	91	114	94			in EWC
Chr 15	53909881	T	C	SNV	0	0.524752	0	0	0	0			83	101	94	97	103	90			in EWC
Chr 15	56312933	C	G	SNV	0	0	0	0	0	0.481481			73	111	98	95	79	81			in EWC
Chr 15	56340718	T	A	SNV	0	0	1	0	0	0			92	76	75	93	96	73			in EWC
Chr 15	56501215	C	T	SNV	0	0.0123457	0	0	1	0			96	81	96	106	109	87			in EWC
Chr 15	58168506	G	C	SNV	0.507463	0	0	0	0	0			67	72	101	57	85	72			in EWC
Chr 15	59074722	C	A	SNV	0	0	0	0.510417	0	0			67	84	84	96	77	60			in EWC
Chr 15	59737693	G	A	SNV	0	0	0	1	0	0			97	79	109	91	108	103			in EWC
Chr 15	59774085	G	A	SNV	0	0.0108696	0.434783	0.00943396	0	0			86	92	92	106	126	90			in EWC
Chr 15	59832201	C	T	SNV	0	0.0104167	0	1	0	0			93	96	88	79	82	107			in EWC
Chr 15	60478396	G	A	SNV	0	0	1	0	0	0			83	95	104	117	88	109			in EWC
Chr 15	61051322	G	A	SNV	0	0	0	0	0	0.409091			80	94	105	109	105	88			in EWC
Chr 15	61091932	G	T	SNV	0	0	0.528736	0	0	0			95	93	87	104	87	112			in EWC
Chr 15	61116267	A	G	SNV	0.490196	0	0	0.00884956	0	0.0105263			102	105	108	113	105	95			in EWC
Chr 15	61736307	G	A	SNV	0.509434	0	0	0	0	0			106	92	101	106	107	109			in EWC
Chr 15	63344985	T	A	SNV	1	0	0	1	1	0			115	140	92	116	101	144			in EWC
Chr 15	66457366	T	C	SNV	0	0	0	0.00833333	0.525253	0			116	94	112	120	99	118			in EWC
Chr 15	67145599	G	C	SNV	0.0153846	0	0.5	0	0	0.0120482			65	77	84	72	81	83			in EWC
Chr 15	67396237	G	A	SNV	1	0	0	0.0190476	0	0.0113636			95	101	86	105	101	88			in EWC
Chr 15	68069580	A	G	SNV	0	0	0	0	0	1			104	103	100	99	107	123			in EWC
Chr 15	69941673	C	T	SNV							0.476744	0							86	91	in EWC
Chr 15	71715097	A	G	SNV							0.45977	0							87	81	in EWC
Chr 15	71730375	G	A	SNV	0	0	0	0	0.519481	0			100	101	109	84	77	94			in EWC
Chr 15	74836480	C	T	SNV	0	1	1	0	0	1			79	120	83	97	88	86			in EWC
Chr 15	75922322	C	A	SNV	0	1	1	0	0	1			81	107	82	102	85	80			in EWC
Chr 15	76920960	G	A	SNV	0	0	0	1	0	0			66	99	90	90	88	79			in EWC
Chr 15	78560866	T	C	SNV	0	0	1	0	0	0			75	94	83	90	80	91			in EWC
Chr 15	81355350	C	A	SNV	0.428571	0	0	0	0	0			84	90	93	98	88	83			in EWC
Chr 15	81380385	G	A	SNV	0	0	0	0	0.00980392	1			100	83	100	123	102	88			in EWC
Chr 15	81655777	C	T	SNV	0	0	0	0	0	1			82	95	94	92	76	88			in EWC
Chr 15	81663486	G	T	SNV							0.447368	0							76	67	in EWC
Chr 15	83565814	A	G	SNV	0	0	0	0	1	0			102	94	88	92	110	102			in EWC
Chr 15	83683110	C	A	SNV							0.459459	0							74	86	in EWC
Chr 15	83824267	G	A	SNV	0	0	0	1	0	0			89	116	83	91	79	117			in EWC
Chr 15	84886317	C	T	SNV	1	0	0	0	0	0			85	88	97	87	84	100			in EWC
Chr 15	86472319	C	T	SNV	0	0	1	0	0	0			89	106	86	113	105	74			in EWC
Chr 15	88178277	C	T	SNV	0	0	0.54878	0	0	0			87	96	82	106	78	80			in EWC
Chr 15	90770031	G	A	SNV	1	0	0	1	1	0			108	101	96	103	114	103			in EWC
Chr 15	91304531	G	A	SNV	1	0.00884956	0	0.00961538	0	0			109	113	107	104	116	94			in EWC
Chr 15	92404862	T	C	SNV	1	0	0	1	0.989583	0			74	76	67	92	96	77			in EWC
Chr 15	92980187	C	T	SNV	0.46988	0	0	0	0	0			83	108	96	105	90	79			in EWC
Chr 15	93367715	C	T	SNV							0.510204	0							98	87	in EWC
Chr 15	95016417	G	T	SNV	0	0	0	1	0	0			80	86	99	84	95	69			in EWC
Chr 15	95206012	G	T	SNV	0	0	0	0	1	0			87	71	86	86	93	77			in EWC
Chr 15	95295119	G	GAATC	INDEL	0	0	0	0	0	0.391304			108	102	122	116	101	92			in EWC
Chr 15	95979978	G	A	SNV							0.612903	0							93	107	in EWC
Chr 15	99054036	G	T	SNV	0	0	0	0	0	0.988506			87	91	78	90	70	87			in EWC
Chr 15	99200774	G	A	SNV	0	0.0117647	0.0126582	0	0	0.506024			92	85	79	85	77	83			in EWC
Chr 15	100252362	G	C	SNV	0	0	0.571429	0	0	0			106	85	77	100	96	77			in EWC
Chr 15	100717298	CACATATAT	C	INDEL	0	0	0.494737	0	0	0			79	86	95	92	92	93			in EWC
Chr 15	101178385	C	T	SNV	0	1	0	0	0	1			79	99	74	87	87	83			in EWC
Chr 15	102530595	C	T	SNV	0	0	0	0	1	0			78	78	64	76	74	74			in EWC
Chr 15	103650389	C	T	SNV	0	0	0	1	0	0			87	72	68	80	58	74			in EWC
Chr 16	4573696	C	T	SNV	1	0	0	0	0	0.00970874			82	103	106	84	79	103			in EWC
Chr 16	5990413	C	T	SNV	0	0	1	0	0	0			86	104	85	93	95	98			in EWC
Chr 16	8513009	C	G	SNV	0	0.528302	0	0	0	0			63	106	81	88	87	79			in EWC
Chr 16	9257047	T	C	SNV	0	0.572816	0	0	0	0			72	103	102	72	77	97			in EWC
Chr 16	10902938	G	T	SNV	0.0123457	0.584158	0	0	0	0			81	101	100	93	80	80			in EWC
Chr 16	13406039	T	C	SNV							1	1							81	84	in EWC
Chr 16	15204795	C	T	SNV	0	0	1	0	0	0			90	89	97	88	62	96			in EWC
Chr 16	15219785	G	A	SNV							1	0							85	84	in EWC
Chr 16	15576969	C	A	SNV	0	0	0.551402	0	0	0			86	83	107	92	98	89			in EWC
Chr 16	16031599	G	A	SNV	1	0	0	0	0	0			74	91	94	86	68	80			in EWC
Chr 16	17306915	A	G	SNV	0	0	0	0	1	0			88	86	85	88	98	84			in EWC
Chr 16	20413290	G	A	SNV	0	0	1	0	0	0			58	88	64	79	88	74			in EWC
Chr 16	20905699	G	A	SNV	0.586538	0	0	0	0	0			104	117	119	119	101	110			in EWC
Chr 16	21540754	G	A	SNV	0	0	0	1	1	0			73	104	76	80	89	91			in EWC
Chr 16	23095470	G	A	SNV	0.0126582	0	0.494253	0	0	0			79	79	87	84	71	65			in EWC
Chr 16	24042997	T	C	SNV	0	0	0	0	0	0.46875			66	107	91	105	92	96			in EWC
Chr 16	24174639	C	T	SNV	0	0.45122	0	0	0	0			85	82	92	91	96	78			in EWC
Chr 16	25499018	T	C	SNV	0	0	0.481013	0	0	0			98	102	79	99	108	109			in EWC
Chr 16	26670213	G	A	SNV	1	0	0	0	0.00925926	0			103	116	103	124	108	87			in EWC
Chr 16	27743668	GA	G	INDEL	0	0	0	1	1	0			66	58	78	77	78	89			in EWC
Chr 16	28553830	AT	A	INDEL							0.438017	0							121	119	in EWC
Chr 16	28811771	G	C	SNV	0	0	0	1	1	0			101	113	110	76	92	111			in EWC
Chr 16	29406754	C	T	SNV	0	0	0	0	0.46789	0			75	84	86	102	109	77			in EWC
Chr 16	30996591	C	G	SNV	1	0	0	0	0	0.015625			70	71	93	80	80	64			in EWC
Chr 16	31618150	C	G	SNV	0	0	0	0	0	0.402778			83	109	79	83	97	72			in EWC
Chr 16	32106021	T	TA	INDEL	0.972222	0	0	0	0	0			72	92	82	75	90	90			in EWC
Chr 16	32853665	G	C	SNV	0	0	0	1	1	0			79	93	84	77	100	82			in EWC
Chr 16	35712913	A	C	SNV	0	1	1	0	0	1			90	90	79	77	92	91			in EWC
Chr 16	38064325	G	A	SNV	0	0	0	0	0	0.558559			90	77	93	101	95	111			in EWC
Chr 16	39499115	A	C	SNV							0.557143	0							70	75	in EWC
Chr 16	40639135	C	T	SNV	0	0	0	0	1	0			83	107	97	83	113	85			in EWC
Chr 16	41009154	C	A	SNV	0	0.392857	0.0138889	0.0121951	0	1			51	56	72	82	78	59			in EWC
Chr 16	42622991	G	A	SNV	0	0	1	0	0	0			84	87	89	98	109	82			in EWC
Chr 16	44075616	T	C	SNV	1	0	0	0	0	0			76	116	107	105	99	77			in EWC
Chr 16	46260924	C	T	SNV							0.416667	0							96	105	in EWC
Chr 16	47866107	C	A	SNV	0	0	0.481481	0	0	0			75	83	81	94	84	84			in EWC
Chr 16	49814453	G	A	SNV	0	0.404762	0	0	0	0			104	84	108	103	115	90			in EWC
Chr 16	52904467	G	A	SNV	0	0	0	1	0	0			96	87	95	89	87	86			in EWC
Chr 16	53868975	G	A	SNV	0	0.439394	0	0	0	0			114	132	123	103	99	98			in EWC
Chr 16	54410904	T	A	SNV	0	0	0	0	0	1			84	84	97	103	85	78			in EWC
Chr 16	54443051	T	A	SNV							0	1							63	69	in EWC
Chr 16	55986498	T	C	SNV	0	0.517241	0	0	0	0			99	116	97	110	102	117			in EWC
Chr 16	56275929	T	A	SNV	1	0.44186	0	0	0	0			79	86	108	91	106	87			in EWC
Chr 16	56281358	T	G	SNV	0.0113636	0.457831	0	0	0	0			88	83	84	79	79	106			in EWC
Chr 16	56485892	G	A	SNV							0.383838	0							99	101	in EWC
Chr 16	56889470	C	T	SNV	0.01	0.00840336	0	1	0	0			100	119	126	126	124	113			in EWC
Chr 16	57027330	C	T	SNV	0	0	0.586207	0	0	0			76	74	87	100	100	92			in EWC
Chr 16	58128530	T	C	SNV	0	0.465909	0	0	0	0			98	88	124	105	122	108			in EWC
Chr 16	58722267	G	A	SNV	1	0	0	0	0	0			53	78	61	81	89	60			in EWC
Chr 16	59803644	CTGGTTCT	C	INDEL	0	0	0	0	1	0			79	58	75	87	53	87			in EWC
Chr 16	60461973	T	A	SNV	1	0	0	0	0	0			92	107	94	100	117	112			in EWC
Chr 16	61329839	C	T	SNV	1	0	0	0	0	0.0104167			88	96	75	108	76	96			in EWC
Chr 16	61930330	TG	T	INDEL	0	0	1	0	0	0			94	91	101	124	111	95			in EWC
Chr 16	63387183	C	T	SNV	0	0	1	0	0	0			94	90	94	108	101	106			in EWC
Chr 16	64439097	A	G	SNV	0.469697	0	0	0	0	0			66	89	94	81	84	89			in EWC
Chr 16	64618440	C	T	SNV	0.412371	0	0	0	0	0			97	109	103	103	110	98			in EWC
Chr 16	65539855	C	T	SNV	0	0	1	0	0	0			98	105	129	106	117	113			in EWC
Chr 16	66137356	C	A	SNV							0.514925	0							134	114	in EWC
Chr 16	66175329	C	T	SNV	0	0	0	0	0	1			101	107	115	104	106	90			in EWC
Chr 16	66806178	G	A	SNV	0	0	0	0	1	0			93	80	86	86	98	99			in EWC
Chr 16	68167379	A	G	SNV	0.516667	0	0	0	0	0			60	101	101	111	103	79			in EWC
Chr 16	68300486	C	T	SNV	0	0.464789	0	0	0	0			79	71	98	70	82	103			in EWC
Chr 16	68346109	C	A	SNV	0	0	0	0	0	0.455696			68	67	76	87	59	79			in EWC
Chr 16	68477626	T	A	SNV	0	0	0	1	0	0			107	103	112	135	126	104			in EWC
Chr 16	70785518	C	T	SNV	0	0	0	0	0	0.556604			88	104	107	105	124	106			in EWC
Chr 16	71115179	G	C	SNV	0	0.495146	0	0	0	0			111	103	88	118	113	94			in EWC
Chr 16	72137860	G	GAAGGAAGA	INDEL	0	0	1	0	0	0			78	68	86	101	77	99			in EWC
Chr 16	72883985	A	C	SNV	0	0.012987	0	1	0	0			88	77	88	75	104	89			in EWC
Chr 16	73607240	T	G	SNV	0	0.0114943	0.384615	0	0	0			73	87	52	72	65	74			in EWC
Chr 16	74338960	A	G	SNV	0	0.490385	0	0	0	0			105	104	115	124	117	106			in EWC
Chr 16	74556255	T	G	SNV	0	0	0	0	0	1			44	59	54	56	64	45			in EWC
Chr 16	74991934	G	A	SNV	0	0	0	0.459184	0	0			77	102	110	98	114	83			in EWC
Chr 16	76736892	C	T	SNV	0.549451	0	0	0	0	0			91	94	94	69	102	94			in EWC
Chr 16	79243726	G	T	SNV							0.495726	0							117	106	in EWC
Chr 16	79259651	G	T	SNV	0	0	1	0	0	0			61	63	79	71	84	72			in EWC
Chr 16	80117670	C	A	SNV	0	0.0136986	0	0.973684	0	0.0217391			74	73	68	76	71	92			in EWC
Chr 16	80621588	G	T	SNV	0	0	0	0	0.607477	0			72	99	103	126	107	99			in EWC
Chr 16	81021551	A	T	SNV							0	0.495413							91	109	in EWC
Chr 16	82194358	C	A	SNV	0	0.568421	0	0	0	0			74	95	90	109	93	75			in EWC
Chr 16	84766415	G	A	SNV	0	0.505618	0	0	0	0			83	89	80	96	112	110			in EWC
Chr 16	85555938	T	G	SNV							0	0.44086							106	93	in EWC
Chr 16	86182116	C	T	SNV	1	0	0	0	0	0			128	97	92	127	120	120			in EWC
Chr 16	86387864	C	A	SNV	0	0	0	0	0.00909091	0.438095			100	112	112	122	110	105			in EWC
Chr 16	88265894	G	A	SNV	0	0	0	0	0	0.490196			76	89	93	98	100	102			in EWC
Chr 16	89648365	A	G	SNV	0	0	1	0	0	0			82	70	86	77	94	109			in EWC
Chr 16	90486444	T	G	SNV	0	0	1	0.0120482	0	0			107	101	59	83	79	106			in EWC
Chr 16	91045943	T	A	SNV	0	0	0	1	1	0			75	80	101	93	106	104			in EWC
Chr 16	92032849	ATAAAACCCC	A	INDEL	0	0	0	0	0	0.528736			107	101	90	111	104	87			in EWC
Chr 16	92439722	T	C	SNV	0	0	1	0	0	0			83	87	87	99	90	91			in EWC
Chr 16	92447064	A	T	SNV	0	0	1	0	0	0			91	87	106	76	61	98			in EWC
Chr 16	92780559	A	G	SNV	0	0	0	0	0	0.530612			92	82	94	93	91	98			in EWC
Chr 16	96575039	T	C	SNV	1	0	0	0	0	0			78	72	86	84	93	80			in EWC
Chr 16	97041553	T	C	SNV	0	0	0	0.0128205	1	0			83	91	90	78	87	68			in EWC
Chr 17	3228316	G	A	SNV	0	0	1	0	0	0			87	94	103	89	106	110			in EWC
Chr 17	4527618	C	T	SNV	0	0	0	0	0.526316	0			81	81	87	86	95	100			in EWC
Chr 17	5449336	G	A	SNV							0.538462	0							52	58	in EWC
Chr 17	5788748	A	G	SNV	0	0	0	0	0	0.481481			82	86	101	90	107	81			in EWC
Chr 17	9628570	A	G	SNV	0	0.0147059	0	0	0.453333	0			53	68	79	65	75	63			in EWC
Chr 17	11336731	G	A	SNV	0	0	0	0	0	0.518987			71	85	79	91	109	79			in EWC
Chr 17	11642076	G	A	SNV	0	0.504854	0	0	0.00869565	0			86	103	96	121	115	100			in EWC
Chr 17	11822560	C	A	SNV	0	0	0	0.482759	0	0			85	88	87	116	81	88			in EWC
Chr 17	12094050	G	A	SNV	0	0	1	0	0	0			71	90	102	100	81	109			in EWC
Chr 17	12382185	CA	C	INDEL	0	0	0	0.455882	0	0			82	82	67	68	79	77			in EWC
Chr 17	12968207	G	GCACCGC	INDEL	0	0	1	0	0	0			80	92	90	94	85	85			in EWC
Chr 17	15269852	C	T	SNV							0	0.419753							62	81	in EWC
Chr 17	16814077	C	G	SNV	0	0	0	0	0	1			78	58	66	63	77	73			in EWC
Chr 17	17454315	G	A	SNV	0	0	0	0.470588	0	0			89	88	83	68	85	86			in EWC
Chr 17	19661630	G	A	SNV	0	0	1	0	0.00900901	0			99	115	98	116	111	112			in EWC
Chr 17	19662981	C	A	SNV	0	0	0	0	0	0.513514			117	85	98	113	108	111			in EWC
Chr 17	19708491	C	A	SNV	0	0	0	0	0.529412	0			91	97	90	116	102	87			in EWC
Chr 17	20551947	A	C	SNV	0.456522	0	0	0	0	0			92	95	91	100	109	99			in EWC
Chr 17	21325423	C	T	SNV	0	0	0	0	0	0.52			87	80	86	93	83	75			in EWC
Chr 17	21996706	G	A	SNV							0.454545	0							88	78	in EWC
Chr 17	22281935	C	A	SNV							0.5	0							66	86	in EWC
Chr 17	23342580	C	G	SNV							0.471264	0							87	103	in EWC
Chr 17	32325326	G	A	SNV	0	0	0	0	0.432432	0			84	102	79	84	74	68			in EWC
Chr 17	32583357	C	T	SNV	0.0178571	0	1	0	0	0			56	68	50	50	68	69			in EWC
Chr 17	32626129	G	C	SNV	0	0	0	0.464646	0	0			84	94	111	99	95	78			in EWC
Chr 17	33072069	G	A	SNV	1	0	0	0	0	0			78	82	97	113	102	90			in EWC
Chr 17	34750992	G	A	SNV							0.488372	0							129	113	in EWC
Chr 17	35196897	T	G	SNV	0	1	1	0	0	1			84	77	90	65	57	89			in EWC
Chr 17	35637331	C	A	SNV	0	0	0	0	0.555556	0			84	74	89	76	72	91			in EWC
Chr 17	36169314	G	A	SNV	0	0	0	1	0	0			75	95	93	105	80	68			in EWC
Chr 17	37374903	T	G	SNV	1	0	0	0	0	0			53	58	71	73	67	68			in EWC
Chr 17	37551168	T	C	SNV	1	0	0	0	0	0			54	86	78	93	81	86			in EWC
Chr 17	38018900	G	A	SNV	0	0	0	1	0	0			72	68	80	91	60	73			in EWC
Chr 17	39277152	C	A	SNV	0.012987	0	1	0	0	0			77	98	92	120	81	81			in EWC
Chr 17	39906160	G	A	SNV	0	1	0	0	0	1			93	76	76	95	91	86			in EWC
Chr 17	42810805	A	G	SNV	0.0131579	0	0	0	0	1			76	98	89	85	100	80			in EWC
Chr 17	47138934	G	A	SNV	0	0	0	0.493976	0	0			81	107	82	83	63	88			in EWC
Chr 17	47921707	C	T	SNV							0.4625	0							80	69	in EWC
Chr 17	48619759	A	C	SNV							0	1							78	56	in EWC
Chr 17	51421539	G	A	SNV	0	0	0	0.44186	0	0			78	101	91	86	81	69			in EWC
Chr 17	52781398	G	T	SNV	0	0	0	0	0	1			99	128	87	109	114	117			in EWC
Chr 17	53013745	T	G	SNV	0	0.0153846	0.583333	0	0	0			53	65	48	80	97	63			in EWC
Chr 17	53421361	G	A	SNV	0	0	0	0.43662	0	0			69	65	65	71	59	61			in EWC
Chr 17	55031980	T	C	SNV	0	0	0	0.0102041	0	1			92	85	91	98	103	85			in EWC
Chr 17	55161007	T	C	SNV	0	0.518987	0	0	0	0			56	79	85	63	71	75			in EWC
Chr 17	55423764	C	T	SNV	0	0	0	0	0	0.480392			107	92	77	90	107	102			in EWC
Chr 17	55920424	G	A	SNV	0	0	0	0	0.532258	0			62	60	57	72	62	73			in EWC
Chr 17	56186666	G	A	SNV	0	0	0	0	0	1			72	81	102	105	107	102			in EWC
Chr 17	57574364	T	TC	INDEL	0	0	0	0.522124	0	0			87	72	93	113	84	108			in EWC
Chr 17	57843530	C	T	SNV	0	0	0	0	0	0.56701			72	85	102	99	115	97			in EWC
Chr 17	58652351	G	C	SNV	0	0	0	0.466102	0	0			81	73	86	118	97	106			in EWC
Chr 17	58896256	C	T	SNV	0	0.544554	0	0	0	0			93	101	110	125	124	99			in EWC
Chr 17	58999769	G	T	SNV							0	1							56	74	in EWC
Chr 17	59488906	C	T	SNV	0	0	0	1	0	0			99	87	88	113	100	108			in EWC
Chr 17	59491695	CTCCCCA	C	INDEL	1	0	0	0	0	0			85	80	84	100	96	81			in EWC
Chr 17	59898250	A	C	SNV	0.5	0	0	0	0	0			96	120	101	131	128	117			in EWC
Chr 17	60938558	T	A	SNV	1	1	1	1	0.991597	1			102	105	94	126	119	110			in EWC
Chr 17	61037359	C	T	SNV	0	0	0	0.528846	0	0			112	104	108	104	108	105			in EWC
Chr 17	61160293	C	A	SNV	0	0	0	0	0.376471	0			79	100	94	109	85	105			in EWC
Chr 17	61255946	A	G	SNV	0	0.566038	0	0	0	0			103	106	102	102	124	85			in EWC
Chr 17	61766926	T	C	SNV	0	0	0	0.00900901	0	0.453704			104	97	105	111	92	108			in EWC
Chr 17	61791038	C	T	SNV	0	0	1	0	0	0			75	101	107	96	101	80			in EWC
Chr 17	62764352	C	T	SNV							0.450549	0							91	116	in EWC
Chr 17	64479193	C	T	SNV	0	0	0	1	0	0			93	95	86	123	92	106			in EWC
Chr 17	64620192	A	G	SNV	0	0	0	0	0	0.542553			70	86	94	95	92	94			in EWC
Chr 17	67389411	G	A	SNV	0	0	0	0	0.511364	0			84	101	94	104	88	86			in EWC
Chr 17	67869113	G	T	SNV	0.984615	0	0	0	1	0			65	99	106	85	77	86			in EWC
Chr 17	69526705	T	C	SNV	0	0	0	1	0	0			101	79	64	88	86	92			in EWC
Chr 17	76293268	A	T	SNV	0	0	0	0.551181	0	0			110	107	111	127	115	105			in EWC
Chr 17	77979916	C	A	SNV	0	0	0	0.545455	0	0			92	93	99	99	78	89			in EWC
Chr 17	79317070	G	A	SNV	0	0	0	0	1	0			70	109	86	101	80	93			in EWC
Chr 17	80790113	A	T	SNV	0	0	0	0	0	0.535354			95	117	108	117	115	99			in EWC
Chr 17	81844992	C	A	SNV	0	0	0.460674	0	0	0			91	94	89	86	76	70			in EWC
Chr 17	82080107	A	G	SNV	0	1	0.0103093	0	0	1			103	103	97	134	112	109			in EWC
Chr 17	84897148	G	C	SNV	1	0	0	0	0	0			68	78	90	85	94	88			in EWC
Chr 17	87341801	T	C	SNV	0	0	0	0	0.461538	0			84	101	117	82	91	83			in EWC
Chr 17	88715987	A	T	SNV	0	0	0	0	0	0.989247			74	91	76	72	95	93			in EWC
Chr 17	90698315	GAAACACAACACAGATCTGTA	G	INDEL	0	0	0	0	0	1			90	110	124	121	121	64			in EWC
Chr 17	91316493	C	T	SNV	1	0	0	0	0	0			75	91	112	106	91	95			in EWC
Chr 17	91887948	ATGGCTTTTTCCACCACTAAC	A	INDEL	0	0	0	1	0	0			92	104	115	94	112	93			in EWC
Chr 17	92065393	A	G	SNV	0.556701	0	0	0	0	0			97	88	102	98	87	98			in EWC
Chr 17	93069074	T	A	SNV							0.987805	0							82	93	in EWC
Chr 17	94028711	A	G	SNV	0	0	0	1	0	0			59	63	70	82	70	83			in EWC
Chr 18	3163025	A	T	SNV	1	1	1	1	1	1			108	118	112	125	105	109			in EWC
Chr 18	3290687	A	G	SNV	0	0.00925926	0	0.991453	0	0			97	108	112	117	112	111			in EWC
Chr 18	3640409	C	T	SNV	0	0	0	0	0	0.44			86	83	73	90	82	75			in EWC
Chr 18	3921777	C	A	SNV	0	0	0	0	0	1			82	104	76	97	95	105			in EWC
Chr 18	5299926	C	T	SNV	1	0	0	0	0	0			95	100	85	110	88	103			in EWC
Chr 18	9667412	A	G	SNV	0	0.542857	0	0	0	0			73	70	80	90	81	90			in EWC
Chr 18	10379052	G	A	SNV							0.535354	0							99	100	in EWC
Chr 18	11068200	G	A	SNV	0	0	0.597561	0	0	0			73	97	82	94	76	81			in EWC
Chr 18	12164497	T	C	SNV	0	0	0	0	0	0.52809			95	75	88	88	101	89			in EWC
Chr 18	13575032	A	T	SNV	0	0	0	1	0	0			52	70	75	50	63	61			in EWC
Chr 18	14014381	C	G	SNV	0	0.567164	1	0	0	1			116	134	98	133	135	132			in EWC
Chr 18	14380770	C	T	SNV	0	0.436893	0	0	0	0			93	103	99	116	105	87			in EWC
Chr 18	15937059	C	A	SNV	1	0	0	0	1	0			108	124	121	119	98	133			in EWC
Chr 18	16428690	A	G	SNV	0	0.416667	0	0	0.0126582	0			77	84	82	71	79	77			in EWC
Chr 18	17045534	A	G	SNV	0	0	1	0	0	0			85	81	90	126	122	93			in EWC
Chr 18	17648870	G	A	SNV	0	0	0	0.482143	0	0			119	105	120	112	120	88			in EWC
Chr 18	20879009	A	T	SNV	1	0.987179	1	1	1	1			76	78	82	86	85	81			in EWC
Chr 18	21438559	T	C	SNV	0	0	1	0	0	0			100	88	82	94	100	104			in EWC
Chr 18	21711236	C	T	SNV	0	0.47191	0	0.010101	0	1			97	89	107	99	114	108			in EWC
Chr 18	21715696	A	T	SNV							0	1							100	104	in EWC
Chr 18	22999915	G	A	SNV	0	0	1	0	0	0			89	88	94	116	97	84			in EWC
Chr 18	23263433	T	A	SNV	0.986842	0	0	0	0	0			76	65	73	71	49	83			in EWC
Chr 18	24434659	G	T	SNV	0	0	0	0	0	1			78	90	92	94	68	80			in EWC
Chr 18	25053831	A	T	SNV	0.35	0.0138889	0.0119048	0	0	0			60	72	84	84	84	69			in EWC
Chr 18	27346250	C	G	SNV	0	0.5	0	0	0	0			122	136	102	115	149	99			in EWC
Chr 18	27987988	G	A	SNV	0	0	1	0	0	0			95	101	90	88	90	92			in EWC
Chr 18	30559817	G	T	SNV	0	0	1	0	0	0			58	70	83	69	88	68			in EWC
Chr 18	32434862	G	A	SNV	0	0	0	0	0.447059	0			67	91	93	86	85	61			in EWC
Chr 18	35553121	C	T	SNV	0	0	0	0	0	1			86	102	94	90	93	106			in EWC
Chr 18	36503114	AGGGGATATAT	A	INDEL	0	0	0	1	0	0			105	105	110	104	117	125			in EWC
Chr 18	38085801	T	C	SNV	0.490566	0	0	0	0	0			53	82	89	77	76	97			in EWC
Chr 18	38799717	G	A	SNV							0	1							70	93	in EWC
Chr 18	39171799	G	C	SNV	0	0	0	1	0	0			66	99	102	93	76	71			in EWC
Chr 18	39915379	G	T	SNV	0.432099	0	0	0	0	0			81	105	112	84	105	94			in EWC
Chr 18	40428142	T	TG	INDEL	0.434343	0	0	0	0	0			99	105	109	121	109	117			in EWC
Chr 18	41655056	G	A	SNV	0.535714	0	0	0.0108696	0	0			84	114	97	92	96	90			in EWC
Chr 18	42368540	C	T	SNV	0	0	0	0.462366	0	0			96	102	106	93	89	95			in EWC
Chr 18	42953239	C	G	SNV	0	0	0	0	0	0.490385			103	98	101	105	115	104			in EWC
Chr 18	44588616	A	C	SNV	0	0	1	0	0	0			97	102	100	102	116	96			in EWC
Chr 18	44650689	A	AGAGAGGGGG	INDEL							0	0.446809							45	47	in EWC
Chr 18	44753352	G	A	SNV	0	0	1	0	0	0			91	88	111	112	102	86			in EWC
Chr 18	46368959	GCATCTC	G	INDEL							1	0							88	87	in EWC
Chr 18	46445675	A	T	SNV	0.982456	0	0	0	0.010989	0			57	65	102	76	91	58			in EWC
Chr 18	47073963	G	A	SNV	0	0.010101	0	0	0	1			79	99	87	86	109	95			in EWC
Chr 18	47468792	A	AT	INDEL							0	0.547826							117	115	in EWC
Chr 18	48986418	G	T	SNV	0	0	0	0	0	0.940299			78	87	89	67	78	67			in EWC
Chr 18	49809203	G	A	SNV							0	0.571429							78	63	in EWC
Chr 18	50925991	C	T	SNV	0	1	0	0	0	0.989247			88	96	82	103	111	93			in EWC
Chr 18	52635997	T	G	SNV	0	1	0	0	0	1			75	69	85	89	82	85			in EWC
Chr 18	54086460	G	A	SNV	1	0	0	1	0	0			70	87	79	82	105	73			in EWC
Chr 18	57001595	T	G	SNV	0	0	0	0	0.423913	0			85	98	104	106	92	78			in EWC
Chr 18	57383113	T	C	SNV	1	0	0	1	1	0.00740741			81	128	110	117	100	135			in EWC
Chr 18	60822846	C	T	SNV	1	0	0	0	0	0.00909091			94	77	102	80	102	110			in EWC
Chr 18	61106715	C	A	SNV	0	0	0	0	0.483146	0			58	88	86	73	89	78			in EWC
Chr 18	61676106	C	G	SNV	0.465753	0	0	0	0	0			73	84	86	98	87	88			in EWC
Chr 18	61781116	T	A	SNV	0	0	0	0	0.489796	0			79	92	91	77	98	80			in EWC
Chr 18	62316476	C	T	SNV	0	0	0	0.45098	0	0			79	101	85	102	95	68			in EWC
Chr 18	63430226	G	A	SNV	0	1	0	0	0	0			79	88	108	110	96	85			in EWC
Chr 18	64298283	G	A	SNV							0	1								68	in EWC
Chr 18	69065152	C	A	SNV	0	0	0	1	0	0			102	117	98	105	127	100			in EWC
Chr 18	70570456	C	T	SNV	1	0	0	0	0	0			83	97	108	120	118	93			in EWC
Chr 18	72156779	G	T	SNV	0	1	0	0	0	0			73	83	75	68	78	74			in EWC
Chr 18	72411194	A	G	SNV	0	0	1	0	0	0			94	112	122	115	98	100			in EWC
Chr 18	72601385	C	T	SNV	0	1	0	0	0	0			84	73	82	95	81	87			in EWC
Chr 18	73623974	G	A	SNV	0	0	0	0	0	1			93	70	78	94	74	85			in EWC
Chr 18	73627236	A	G	SNV	0	0	0	0	0	1			63	74	78	92	91	78			in EWC
Chr 18	73628202	A	C	SNV	0.45122	0	0	0	0	0			82	83	87	106	106	82			in EWC
Chr 18	74243725	C	T	SNV	0	0	0	1	0	0			79	86	105	109	95	95			in EWC
Chr 18	75403704	C	T	SNV	0	0	0	0	1	0			106	106	109	99	106	92			in EWC
Chr 18	75436069	A	G	SNV	0	0	0	0	0	1			83	88	90	74	91	54			in EWC
Chr 18	75854832	G	T	SNV	0	0	0	1	0	0			90	107	101	99	106	107			in EWC
Chr 18	77055105	A	C	SNV	0	0	1	0	0	0			82	81	95	60	98	92			in EWC
Chr 18	77433978	G	C	SNV	0	1	0	0	0	0			86	103	84	94	88	70			in EWC
Chr 18	79166022	G	C	SNV	0.382353	0	0	0	0	0			68	80	76	84	79	89			in EWC
Chr 18	79618218	T	TA	INDEL	0	0	0	0	0.518072	0			79	94	91	105	83	101			in EWC
Chr 18	80390274	G	A	SNV	1	0	0	0.0116279	1	0			100	98	93	86	87	97			in EWC
Chr 18	80613561	G	A	SNV	0	0	0	0	0.475248	0			89	113	86	91	101	90			in EWC
Chr 18	81226654	C	T	SNV	1	0	0	0	0	0			79	88	105	104	126	98			in EWC
Chr 18	81590089	G	A	SNV	0	0	1	0	0	0			79	63	67	72	79	71			in EWC
Chr 18	81640445	C	A	SNV	0	0	0.510204	0	0	0			83	108	98	79	96	75			in EWC
Chr 18	82826791	C	T	SNV							0.515464	0							97	106	in EWC
Chr 18	82938269	T	A	SNV							0.010101	1							99	92	in EWC
Chr 18	83232795	G	C	SNV	0.0133333	0	0	0	0.538462	0			75	114	86	88	104	85			in EWC
Chr 18	83354910	C	T	SNV							0.518072	0							83	74	in EWC
Chr 18	83423258	C	T	SNV	0	0	0	0	0	0.494505			94	91	88	87	84	91			in EWC
Chr 18	84349385	C	T	SNV							0.514019	0							107	101	in EWC
Chr 18	84782993	G	A	SNV	0	0	0	1	0	0			98	110	91	84	82	98			in EWC
Chr 18	85465690	G	A	SNV	0.011236	0	0.598214	0	0	0			89	95	112	122	124	81			in EWC
Chr 18	87227174	T	G	SNV	1	0	0	0	0	0.0108696			91	97	103	131	108	92			in EWC
Chr 18	87482609	C	T	SNV	0	0	0.536082	0	0	0			76	101	97	105	88	74			in EWC
Chr 18	88762300	G	T	SNV							1	0.019802							101	101	in EWC
Chr 18	89288817	G	A	SNV	0	0	0.0131579	0	0	0.434783			73	91	76	84	90	69			in EWC
Chr 18	89789260	G	A	SNV							0	0.574468							102	94	in EWC
Chr 18	89965423	G	C	SNV	0	0	0	0	0.46875	0			85	73	82	87	96	74			in EWC
Chr 18	90126713	T	A	SNV							0.580357	0							112	112	in EWC
Chr 19	3380105	G	A	SNV	0	0.00980392	0	0.471698	0	0			107	102	107	106	101	115			in EWC
Chr 19	4429215	T	G	SNV	0	0	0.5	0	0	0			72	60	68	60	72	79			in EWC
Chr 19	4897482	C	A	SNV	0	1	0	0	0.0113636	1			87	91	72	83	88	91			in EWC
Chr 19	5847872	C	T	SNV	0	0	0	0.548077	0	0			106	90	102	104	93	124			in EWC
Chr 19	6623677	C	G	SNV	0	0	0	0	1	0			57	69	87	70	66	68			in EWC
Chr 19	7427110	C	A	SNV							0	0.547368							98	95	in EWC
Chr 19	10877076	C	T	SNV	0	0	0.505618	0	0	0			90	100	89	100	99	97			in EWC
Chr 19	12828694	G	A	SNV	0	0	0	0	0	1			68	72	61	100	79	110			in EWC
Chr 19	13626633	A	C	SNV							0.512821	0							78	82	in EWC
Chr 19	15183290	C	A	SNV	1	0	0	1	1	0.0119048			95	97	86	92	113	84			in EWC
Chr 19	15645735	G	T	SNV	0.505376	0	0	0.0120482	0	0			93	98	93	83	96	85			in EWC
Chr 19	15738257	G	A	SNV	0.571429	0	0	0	0	0			105	113	97	112	103	92			in EWC
Chr 19	15787046	C	T	SNV							0	0.989011							101	91	in EWC
Chr 19	16617707	T	C	SNV	0	0	0	0	1	0			97	132	136	156	129	122			in EWC
Chr 19	16814793	T	G	SNV							0	1							95	70	in EWC
Chr 19	17575786	G	T	SNV	0	0	0	0	0.472222	0			97	92	96	115	108	104			in EWC
Chr 19	19526215	C	T	SNV	0.5	0	0	0	0	0			72	61	83	75	75	71			in EWC
Chr 19	20900637	C	T	SNV	0	0	0	1	0	0			86	83	99	101	101	84			in EWC
Chr 19	20986128	C	T	SNV	0	0	0	1	0	0.0106383			127	82	116	108	112	94			in EWC
Chr 19	21670778	G	A	SNV	0	0	0.50495	0	0	0			109	98	101	100	115	102			in EWC
Chr 19	23087690	C	A	SNV	0	0	0.520548	0	0	0			71	92	73	75	55	68			in EWC
Chr 19	23962519	G	A	SNV	0.441558	0	0	0	0	0			77	94	103	89	96	93			in EWC
Chr 19	24270466	G	A	SNV	0	0	0	0	0	0.52			92	92	110	80	74	100			in EWC
Chr 19	24741385	C	T	SNV	0	0	0	1	0	0			94	94	102	69	107	97			in EWC
Chr 19	29077039	T	A	SNV							0	1							112	101	in EWC
Chr 19	29599075	C	T	SNV	0	1	0	0	0	1			90	78	66	82	93	78			in EWC
Chr 19	29652533	T	G	SNV	0	0	0	1	0	0			79	81	83	81	92	85			in EWC
Chr 19	29670626	C	T	SNV	0	0	0	0	0	0.413043			82	74	83	72	77	92			in EWC
Chr 19	30322180	C	T	SNV	0	0	0.467213	0	0	0			93	96	122	114	97	90			in EWC
Chr 19	31464470	C	G	SNV	0	0.539326	0	0	0	0			89	89	90	110	104	75			in EWC
Chr 19	31613238	C	T	SNV	0	1	1	0	0	1			83	73	83	81	95	99			in EWC
Chr 19	32217141	C	G	SNV							0.504587	0							109	101	in EWC
Chr 19	35063576	C	T	SNV	0	0	0	0	0	0.989899			91	97	86	85	118	99			in EWC
Chr 19	35552324	T	A	SNV	0.541667	0	0	0	0	0			96	91	96	109	106	104			in EWC
Chr 19	38364785	C	A	SNV	0	0	0	0.00892857	0.474227	0			90	90	96	112	97	108			in EWC
Chr 19	38584566	A	G	SNV	0	0	0	0	0.5	0			91	108	104	91	108	85			in EWC
Chr 19	45567058	C	T	SNV	0	0	0	0	0.505618	0			78	100	101	93	89	99			in EWC
Chr 19	45709489	AGT	A	INDEL							0	0.469136							87	81	in EWC
Chr 19	47034594	C	T	SNV	0	1	0	0.00884956	0.0108696	1			85	123	96	113	92	95			in EWC
Chr 19	47683048	T	A	SNV	0	0	0.484211	0	0	0			88	83	95	103	90	99			in EWC
Chr 19	47934809	G	A	SNV							0	0.6							88	95	in EWC
Chr 19	48581661	G	T	SNV	0.575	0	0	0	0	0			80	99	90	126	115	96			in EWC
Chr 19	49245778	C	A	SNV							0.504274	0.00862069							117	116	in EWC
Chr 19	50858459	G	C	SNV	0	1	0	0	0	1			91	74	109	100	107	105			in EWC
Chr 19	51540681	C	A	SNV	0	1	0	0	0	1			76	58	75	76	60	84			in EWC
Chr 19	51989648	G	C	SNV	0	0	0	0	0.489796	0			94	104	100	115	98	105			in EWC
Chr 19	52609422	A	T	SNV	0	0	0.504587	0	0	0			80	101	109	103	92	107			in EWC
Chr 19	55133915	G	A	SNV	0	0	0.539823	0	0	0			83	94	113	103	106	88			in EWC
Chr 19	55224439	G	A	SNV							0.55914	0							93	106	in EWC
Chr 19	55427390	TGTGATGTCACCAGTAGCATTAACCCCAGACAGGCTGCAGTGTGCC	T	INDEL	0	0.37931	0	0	0	0			87	58	110	98	98	80			in EWC
Chr 19	55768116	T	A	SNV	0	0	0	0	0	1			84	70	83	63	80	73			in EWC
Chr 19	56098325	A	G	SNV	0	0	0	0	0.420561	0			94	99	111	111	107	108			in EWC
Chr 19	58286770	G	A	SNV	0	1	0	0	0	1			67	82	77	91	95	77			in EWC
Chr 2	5197044	C	T	SNV	0	0	1	0	0	0			94	90	101	87	84	88			in EWC
Chr 2	5248032	G	T	SNV	0	0	1	0	0	0			89	90	76	72	86	73			in EWC
Chr 2	5249999	T	C	SNV	0	0	1	0	0	0			70	88	58	74	67	74			in EWC
Chr 2	5299172	T	G	SNV							0	0.446809							78	94	in EWC
Chr 2	5319861	G	A	SNV	0	0	1	0	0	0			71	96	83	86	90	80			in EWC
Chr 2	5381524	G	A	SNV	0	0	0	0	0	1			73	93	84	86	81	79			in EWC
Chr 2	5957682	G	A	SNV							0.557143	0							70	73	in EWC
Chr 2	7481587	A	G	SNV	0	0	0	0	0	0.455556			93	103	102	91	82	90			in EWC
Chr 2	7988997	C	T	SNV	0	0	1	0	0	0			97	104	100	119	115	122			in EWC
Chr 2	8480511	C	G	SNV							0.527027	0							74	94	in EWC
Chr 2	8854975	G	A	SNV	0	0	0	1	0	0			87	87	107	108	113	87			in EWC
Chr 2	10962752	A	G	SNV	1	0	0	1	1	0			79	93	94	89	77	89			in EWC
Chr 2	11944096	C	A	SNV	0	0	0	0	1	0			78	94	82	121	92	87			in EWC
Chr 2	12662495	C	T	SNV	0	0	1	0	0	0			64	77	79	62	71	85			in EWC
Chr 2	14913587	G	T	SNV	0	0	0.539474	0	0	0			81	81	76	77	93	116			in EWC
Chr 2	15321556	C	T	SNV	0	0.984848	0.0178571	0	0	1			74	66	56	80	59	74			in EWC
Chr 2	18547467	G	A	SNV	0.533333	0	0.0166667	0	0	0			75	69	60	63	60	68			in EWC
Chr 2	19094367	C	G	SNV							0	0.487805							75	82	in EWC
Chr 2	22888905	C	T	SNV	0.470588	0	0	0	0	0			68	72	66	88	82	75			in EWC
Chr 2	23381428	C	T	SNV							0	0.487179							57	78	in EWC
Chr 2	24964179	T	G	SNV	0.597403	0	0	0	0	0			77	81	85	87	103	98			in EWC
Chr 2	25016075	T	G	SNV	0.371795	0	0	0	0	0			78	73	71	101	95	89			in EWC
Chr 2	26717064	C	T	SNV	0	0	1	0	0	0			50	64	77	64	60	70			in EWC
Chr 2	26728237	G	A	SNV	0	1	0	0	0	1			81	101	91	93	60	79			in EWC
Chr 2	26949777	A	G	SNV	0	0.00970874	0	0	1	0			112	103	94	81	101	97			in EWC
Chr 2	27138171	C	A	SNV	0	0	1	0	0	0			64	91	84	94	70	82			in EWC
Chr 2	27245643	C	T	SNV	0	0	0	0	0	1			80	70	90	84	88	96			in EWC
Chr 2	27491072	C	T	SNV	0	0	0	0	0	1			82	78	72	66	71	67			in EWC
Chr 2	28370140	AGGGCTGTGAGTAAC	A	INDEL	0.446154	0	0	0	0	0			65	88	86	73	76	101			in EWC
Chr 2	28555639	G	C	Multisite	1	0	0	0	0	0			71	95	97	76	90	81			in EWC
Chr 2	28555640	C	A	Multisite	1	0	0	0	0	0			72	95	97	74	90	80			in EWC
Chr 2	29460016	C	T	SNV							1	1							89	99	in EWC
Chr 2	31506077	C	A	SNV	0	0	0	0	0	0.425			70	76	88	80	82	80			in EWC
Chr 2	34531333	G	A	SNV							0	1							99	76	in EWC
Chr 2	37903626	G	A	SNV	0	0	0	1	0	0			66	70	82	88	82	64			in EWC
Chr 2	38000260	C	T	SNV	0.464286	0	0	0	0	0			84	102	111	86	103	79			in EWC
Chr 2	38180859	C	T	SNV	0.981651	0	0	1	0.991379	0			109	107	103	125	116	121			in EWC
Chr 2	39621118	A	T	SNV	0.0128205	0	0	1	0	0			78	97	78	61	66	70			in EWC
Chr 2	41144678	C	A	SNV	0	0	1	0	0	0			93	117	103	130	122	97			in EWC
Chr 2	42264805	T	C	SNV	0	0	0	0	0	1			106	103	117	137	121	107			in EWC
Chr 2	42334843	C	T	SNV	0	0	0	0	0	1			73	81	84	92	107	87			in EWC
Chr 2	44231283	A	T	SNV	0	1	0	0	0	1			108	113	99	117	110	111			in EWC
Chr 2	44317026	C	A	SNV							0.506024	0							83	118	in EWC
Chr 2	46259835	C	T	SNV	0.544554	0	0	0	0	0			101	101	96	117	101	123			in EWC
Chr 2	47203854	A	T	SNV	1	0	0	1	0	0			80	81	74	71	95	79			in EWC
Chr 2	48051944	C	T	SNV	0	1	0	0	0	1			96	96	98	129	113	114			in EWC
Chr 2	48178861	C	T	SNV	0	0	0.547945	0	0	0			84	81	73	100	79	73			in EWC
Chr 2	53153642	G	C	SNV							0	1							121	119	in EWC
Chr 2	53838244	A	G	SNV	0	0	1	0	0	0			76	78	73	98	95	90			in EWC
Chr 2	54193671	G	A	SNV	0	0.549296	0	0	0	0.025974			83	71	88	74	86	77			in EWC
Chr 2	54962780	A	G	SNV	0	0	0	1	0	0			78	79	92	96	96	94			in EWC
Chr 2	55510280	G	A	SNV							0	1							103	117	in EWC
Chr 2	55532247	G	A	SNV	0	0	0	0	0	0.469027			97	101	105	119	120	113			in EWC
Chr 2	57860539	G	A	SNV	0	0	0	1	1	0			72	111	108	117	111	90			in EWC
Chr 2	58319507	A	G	SNV	1	1	0	1	1	1			97	112	96	103	117	112			in EWC
Chr 2	58333083	T	G	SNV	0	0	1	0	0	0			93	112	106	98	89	100			in EWC
Chr 2	62220423	G	A	SNV	0	1	0	0	0	0			107	118	88	116	102	95			in EWC
Chr 2	63967431	C	T	SNV	0	0	0	1	0	0			98	89	102	104	93	80			in EWC
Chr 2	64080077	G	A	SNV	0	0	0	0	0.392857	0.0111111			73	90	84	76	84	90			in EWC
Chr 2	66980761	C	T	SNV	0	0	0.522523	0	0	0			98	116	111	112	103	118			in EWC
Chr 2	67094660	G	A	SNV	0	0	1	0	0	0			76	57	76	92	65	91			in EWC
Chr 2	67305056	G	A	SNV	0	0.466667	0	0	0	0.0102041			79	105	117	93	105	98			in EWC
Chr 2	67558371	C	A	SNV							0.487805	0.0273973							82	73	in EWC
Chr 2	68583791	G	A	SNV	0	0	1	0	0	0			62	79	63	80	78	65			in EWC
Chr 2	72062414	C	T	SNV	0	0.445946	0	0	0	0			72	74	88	85	79	86			in EWC
Chr 2	75397448	AG	A	Multisite							0.478261	0.00840336							92	119	in EWC
Chr 2	75397450	CAG	C	Multisite							0.478261	0.00833333							92	120	in EWC
Chr 2	76307122	G	A	SNV	0	0.0111111	0.0128205	0	1	0			97	90	78	98	93	114			in EWC
Chr 2	76535510	G	A	SNV	0	0.365854	0	0	0	0			73	82	86	101	113	87			in EWC
Chr 2	76702373	A	G	SNV	0	1	0	0	0	1			95	100	97	116	113	90			in EWC
Chr 2	77553757	T	A	SNV	0	0	0	1	0	0			93	97	53	91	75	90			in EWC
Chr 2	78828328	G	A	SNV	0	0	0	0	0.00900901	1			102	117	111	127	111	88			in EWC
Chr 2	79799973	C	T	SNV	1	0	0	0.0123457	1	0.0136986			73	87	69	81	77	73			in EWC
Chr 2	81671338	T	C	SNV	0.987952	1	0	0	1	1			83	98	104	124	118	116			in EWC
Chr 2	81747956	C	A	SNV	1	0	0	0	1	0			76	69	70	79	65	72			in EWC
Chr 2	83290239	C	G	SNV	0	0	0	0.422535	0	0			72	68	64	71	57	75			in EWC
Chr 2	85062171	C	T	SNV	0	0	0	0	1	0			66	87	75	70	77	64			in EWC
Chr 2	88181808	G	A	SNV	0	0.505376	0	0	0	0			110	93	87	97	88	119			in EWC
Chr 2	88223220	T	C	SNV	0	0	0	0.504425	0	0			108	99	82	113	91	105			in EWC
Chr 2	88415166	A	T	SNV	0	0.489362	0.0125	0	0	0			61	94	80	83	74	91			in EWC
Chr 2	91896912	C	T	SNV	0	0	0	0	1	0			104	106	90	112	115	97			in EWC
Chr 2	92586017	G	T	SNV	0	0	0	0	1	0			95	105	102	118	102	100			in EWC
Chr 2	93645764	C	A	SNV	0	0	0	0	0.516854	0.011236			67	87	88	86	89	89			in EWC
Chr 2	94234293	TGA	T	INDEL							0.56701	0							97	75	in EWC
Chr 2	94538593	A	T	SNV	0	0	0	0.459184	0	0			98	108	103	98	98	103			in EWC
Chr 2	95436625	C	T	SNV							0.409639	0							83	99	in EWC
Chr 2	96174602	C	A	SNV							0	0.438095							97	105	in EWC
Chr 2	96238624	C	A	SNV	0.0142857	1	0	0	0	1			70	60	80	78	72	86			in EWC
Chr 2	96992939	G	T	SNV	0	0	1	0.00900901	0	0			94	100	100	111	117	98			in EWC
Chr 2	97255115	T	A	SNV	0	0	0	0.452632	0	0			86	67	79	95	87	93			in EWC
Chr 2	97377988	T	A	SNV	1	1	0	0	1	1			96	110	102	115	103	106			in EWC
Chr 2	98328466	G	T	SNV							0.47619	0							84	90	in EWC
Chr 2	98493385	G	T	SNV	0	0	1	0	0	0			59	66	52	100	65	69			in EWC
Chr 2	98929947	C	T	SNV	0	0	0.617021	0	0	0			81	82	94	95	80	92			in EWC
Chr 2	98979886	A	G	SNV							0	0.525253							82	99	in EWC
Chr 2	99085998	AGTTACAT	A	INDEL	0	0	1	0	0	0			90	95	94	85	109	101			in EWC
Chr 2	99650825	G	A	SNV							0.509615	0.0701754							104	114	in EWC
Chr 2	101632531	A	G	SNV	0	0	1	0	0	0			93	110	89	89	98	81			in EWC
Chr 2	101908154	C	T	SNV	0	0	0	0.525424	0	0			94	91	96	118	110	124			in EWC
Chr 2	102856240	C	T	SNV	0	0	0	0	0.48951	0			132	120	121	148	143	111			in EWC
Chr 2	104188123	T	A	SNV	0	0	0	1	0	0			70	74	76	90	79	77			in EWC
Chr 2	105821575	T	A	SNV	0.988372	1	0	0	1	1			86	95	94	120	107	111			in EWC
Chr 2	106486180	C	T	SNV							0.5	0							118	110	in EWC
Chr 2	107217678	G	C	SNV	0.463768	0	0	0	0	0			69	93	78	74	89	71			in EWC
Chr 2	107461868	C	T	SNV	1	0	0	0	0	0.0166667			66	76	51	69	71	60			in EWC
Chr 2	107854104	T	C	SNV	1	0	0	0	1	0			88	104	103	105	109	125			in EWC
Chr 2	108513464	G	T	SNV	0	0	0	0	0.455446	0			81	98	80	82	101	90			in EWC
Chr 2	108749463	A	T	SNV	1	0	0	0	0	0			101	99	90	120	110	100			in EWC
Chr 2	109744192	TAA	T	INDEL							0.363636	0							88	108	in EWC
Chr 2	110351957	G	C	SNV	1	0	0	0	1	0			66	76	91	80	71	83			in EWC
Chr 2	110517742	T	G	SNV	1	0	0	0	0	0.0131579			67	88	102	101	108	76			in EWC
Chr 2	112868568	G	T	SNV	0	0	0.489362	0	0	0			93	99	94	116	101	100			in EWC
Chr 2	113356064	G	A	SNV	0	0	0.00925926	0	0.529412	0			69	117	108	101	119	90			in EWC
Chr 2	114105924	T	TAAAG	INDEL	0	0	0	0	0.449541	0			78	94	119	85	109	85			in EWC
Chr 2	116250392	G	A	SNV							0.515464	0.010101							97	99	in EWC
Chr 2	117009175	AG	A	INDEL							0.987805	0							82	79	in EWC
Chr 2	117051745	G	T	SNV	0	0	0.00877193	0	0.558559	0			100	93	114	106	111	79			in EWC
Chr 2	117581161	G	T	SNV	0	0	0.00934579	0	0.50495	0			89	84	107	99	101	96			in EWC
Chr 2	118442787	G	C	SNV	0	0	0	0.58871	0	0			109	72	114	124	84	99			in EWC
Chr 2	118853212	C	T	Multisite	0	0	0	0	0	1			69	69	95	88	65	77			in EWC
Chr 2	118853219	A	T	Multisite	0	0	0	0	0	1			66	70	91	86	64	78			in EWC
Chr 2	118853226	A	G	Multisite	0	0	0	0	0	1			65	67	92	87	69	80			in EWC
Chr 2	119076928	G	GTTTCTA	INDEL							1	0.478723							111	94	in EWC
Chr 2	119627638	C	T	SNV	0	1	0	0	0	0			71	78	70	87	60	80			in EWC
Chr 2	120206174	G	A	SNV	1	0	0	0	0	0			79	106	102	92	89	90			in EWC
Chr 2	120462855	G	A	SNV							1	0.597222							81	72	in EWC
Chr 2	120575978	T	C	SNV	0	0	0	0	0.457831	0			68	73	59	75	83	81			in EWC
Chr 2	120692198	C	T	SNV	0	1	0	0	0	0.0126582			80	82	71	76	95	79			in EWC
Chr 2	122363649	G	T	SNV	0	0	1	1	0	1			109	119	128	108	91	115			in EWC
Chr 2	124546856	C	T	SNV	0	0	0	1	0	0			96	104	120	132	121	100			in EWC
Chr 2	125051708	G	A	SNV	0	0	0	0	0.51087	0			77	98	86	83	92	94			in EWC
Chr 2	125605263	AACAAGT	A	INDEL	0	0	1	0	0	0			80	110	74	97	87	93			in EWC
Chr 2	126167967	G	T	SNV	0.463918	0	0	0	0	0			97	112	114	118	139	127			in EWC
Chr 2	126883330	A	T	SNV	0	0	0	0.4	0	0			72	80	93	75	98	99			in EWC
Chr 2	127543404	G	C	SNV	0	0	0	1	0	0			64	68	65	79	69	88			in EWC
Chr 2	129148930	C	T	SNV							1	0							118	104	in EWC
Chr 2	129731142	C	T	SNV	0	0	1	0	0	0			92	122	90	104	103	103			in EWC
Chr 2	131813359	G	A	SNV	0	0	0.0104167	0	0	1			85	80	96	97	91	110			in EWC
Chr 2	133529375	G	A	SNV	0	1	0	0	0	0.00877193			78	96	105	116	103	114			in EWC
Chr 2	135907561	G	A	SNV	0	0	0.0108696	0	0	1			104	106	92	126	125	125			in EWC
Chr 2	136568539	A	G	SNV	0	0	0	0	0.011236	1			82	67	90	106	89	100			in EWC
Chr 2	136923351	G	A	SNV	0	0	0	0	0.493976	0			88	98	82	112	83	84			in EWC
Chr 2	138205027	C	A	SNV	0	0	0	0	0	1			96	105	102	117	108	108			in EWC
Chr 2	141710280	C	T	SNV	1	1	0	1	1	0.00757576			106	81	122	125	117	132			in EWC
Chr 2	143466595	G	A	SNV	0	0	0	0	0.468085	0			84	97	105	115	94	117			in EWC
Chr 2	143554886	G	T	SNV	0	0	0	0.534884	0	0			127	116	110	129	137	113			in EWC
Chr 2	146847269	G	C	SNV	1	0	0	0	0	0			58	74	75	99	77	73			in EWC
Chr 2	148113079	C	A	SNV	0.972973	0.0107527	0	0	0.0194175	0.984127			74	93	98	78	103	63			in EWC
Chr 2	149799777	A	G	SNV	0	0.00961538	0.01	0	1	0			100	104	100	101	127	111			in EWC
Chr 2	151145004	C	T	SNV	0	0	0	1	0	0			106	96	117	98	87	102			in EWC
Chr 2	154486573	G	A	SNV	0	0	0	1	0	0			78	95	70	78	78	90			in EWC
Chr 2	155066634	TTCCCAC	T	INDEL	0	0	0.494253	0	0	0			76	101	87	82	91	76			in EWC
Chr 2	156121549	GA	G	INDEL	0	0	0	0	1	0			99	92	106	90	70	93			in EWC
Chr 2	156640358	G	A	SNV	0	0.0128205	0	0	0	1			81	78	74	86	80	82			in EWC
Chr 2	157427264	G	T	SNV	0	0	0	0	1	0			88	80	95	69	84	67			in EWC
Chr 2	157925620	G	T	SNV	0	0	0	0	0	1			81	85	94	90	71	99			in EWC
Chr 2	162410966	G	A	SNV	0	0	0	0	0	0.597701			79	100	79	94	91	87			in EWC
Chr 2	162879767	C	T	SNV	0	0	0	1	0	0			98	83	98	99	101	90			in EWC
Chr 2	163690446	C	T	SNV	0.407407	0	0	0	0	0			81	87	88	82	97	103			in EWC
Chr 2	164073626	C	A	SNV							0.0142857	0.391304							70	69	in EWC
Chr 2	164560853	C	T	SNV	0	0.579545	0	0	0	0.991228			85	88	107	91	98	114			in EWC
Chr 2	164848902	G	A	SNV	0	0.536364	0	0	0	0			87	110	90	79	74	84			in EWC
Chr 2	166225978	G	A	SNV	0	0	0	0	0	0.558442			74	58	87	76	78	77			in EWC
Chr 2	166303139	C	G	SNV	1	0	0	0	0	0			87	90	92	97	94	88			in EWC
Chr 2	166409796	T	C	SNV	0	0	0	0.518987	0	0			68	74	102	79	72	70			in EWC
Chr 2	166656375	G	A	SNV	0	0	0	0	0	0.47619			77	87	81	72	78	84			in EWC
Chr 2	166820548	G	A	SNV	0	0	0	0	0.493671	0			81	84	72	76	79	71			in EWC
Chr 2	167401252	C	T	SNV	0.0113636	0	0	0.690722	0	0			88	86	87	97	64	103			in EWC
Chr 2	167617527	G	T	SNV	0	0	0	0	0	1			106	79	92	86	75	120			in EWC
Chr 2	169118429	A	T	SNV	0	0	0.924528	0	0	0			68	76	53	64	62	71			in EWC
Chr 2	169157589	T	A	SNV							0	1							58	81	in EWC
Chr 2	170914168	G	A	SNV	0	0.0125	0	1	0	0			74	80	72	73	73	56			in EWC
Chr 2	171471865	T	A	SNV	0	0	0	1	0	0			107	98	106	119	109	113			in EWC
Chr 2	171908930	G	T	SNV	0	0	1	0	0	0			89	82	116	90	111	107			in EWC
Chr 2	172266711	G	A	SNV	0	0	0	0	0	1			66	82	84	86	89	98			in EWC
Chr 2	172980351	C	T	SNV							0.527778	0							72	61	in EWC
Chr 2	174874028	G	C	SNV	0	0	0	0	1	0			109	93	88	100	100	112			in EWC
Chr 2	177966155	CCTTGGTCCA	C	INDEL	0	0	0	0	0.402439	0			96	79	86	68	82	103			in EWC
Chr 2	178588394	C	T	SNV							0	0.412371							115	97	in EWC
Chr 3	4875271	A	T	SNV	0	0	0	0	1	0			81	72	65	88	62	82			in EWC
Chr 3	6041307	C	T	SNV							0.518868	0							106	95	in EWC
Chr 3	6085352	TATA	T	Multisite	0	1	0	0	0	1			62	49	78	83	59	50			in EWC
Chr 3	6085358	TCATATACAC	T	Multisite	0	1	0	0	0	1			58	49	77	80	58	50			in EWC
Chr 3	6719360	A	T	SNV	0.973684	0	0	0	0	0			76	83	68	89	79	73			in EWC
Chr 3	7138215	G	A	SNV	0.989362	0	0	0	0	0			94	98	103	93	105	104			in EWC
Chr 3	8266962	T	A	SNV	0	0.010989	1	0	0	0			91	91	94	95	104	108			in EWC
Chr 3	8332974	G	A	SNV	0.0103093	0	0.537736	0	0	0			97	83	106	98	80	73			in EWC
Chr 3	8812765	A	C	SNV							0.50495	0.00925926							101	108	in EWC
Chr 3	9410103	C	T	SNV	0	0	0	1	0	0			90	101	108	100	114	88			in EWC
Chr 3	10183101	T	C	SNV	0	0	0	0.474576	0	0			110	102	89	118	110	108			in EWC
Chr 3	11033898	C	T	SNV							0.447368	0							114	95	in EWC
Chr 3	11312180	G	A	SNV	0	0	0	0	0.990826	0			88	95	102	101	109	106			in EWC
Chr 3	11643625	A	T	SNV	0	0	0	1	0	0			97	93	94	107	88	75			in EWC
Chr 3	11864070	T	G	SNV	0	0	0	0	0.914894	0.0136986			64	68	60	86	47	73			in EWC
Chr 3	12309187	T	G	SNV	0.985915	0	0	0	0.011236	0			71	90	68	93	89	68			in EWC
Chr 3	13311215	G	T	SNV	0	0	0	0	0	1			74	109	87	72	92	92			in EWC
Chr 3	14328436	G	A	SNV	0	0	0	0	0	0.511111			76	72	76	88	70	90			in EWC
Chr 3	16127943	AAGG	A	INDEL	0	0	0	0	0	1			80	75	85	57	79	71			in EWC
Chr 3	16261233	T	A	SNV	1	0	0	0	0	0			73	101	80	102	77	83			in EWC
Chr 3	16892150	G	A	Multisite	0	0	0	0.588235	0	0			117	119	81	102	106	79			in EWC
Chr 3	16892151	C	T	Multisite	0	0	0	0.588235	0	0			117	119	81	102	106	79			in EWC
Chr 3	18607763	C	T	SNV	0.00877193	0	0.011236	1	0	0			114	90	89	106	123	79			in EWC
Chr 3	18669586	T	G	SNV							0	0.479167							113	96	in EWC
Chr 3	19415498	G	A	SNV	1	0	0	1	1	0			87	88	94	98	89	66			in EWC
Chr 3	21082770	A	G	SNV	0	0	0	1	0	0			76	123	102	120	133	112			in EWC
Chr 3	22238787	C	T	SNV							0	0.989691							89	97	in EWC
Chr 3	23671657	A	T	SNV	0	0	0	0	0	1			66	65	87	73	83	73			in EWC
Chr 3	24708430	T	C	SNV	1	0	0	0	0	0			85	101	103	109	94	88			in EWC
Chr 3	24838275	G	A	SNV							0.5625	0.0169492							112	118	in EWC
Chr 3	25056744	A	T	SNV	0	0	0.00699301	0	1	0			92	116	143	111	108	85			in EWC
Chr 3	27423341	G	A	SNV	0	0.505376	0	0	0	0			84	93	101	99	103	105			in EWC
Chr 3	28670010	G	A	SNV	0	0	0	0.423913	0	0			88	106	115	92	96	94			in EWC
Chr 3	29745608	G	A	SNV	0	1	0	0	0	1			93	106	101	105	115	106			in EWC
Chr 3	31852069	A	C	SNV							0	0.984127							93	63	in EWC
Chr 3	32470617	T	C	SNV	0	0	0	1	0	0			108	75	81	104	82	94			in EWC
Chr 3	32506613	G	A	SNV							0.5	0							82	83	in EWC
Chr 3	35676018	CAGAT	C,CAGATAGAT	INDEL	1	0	0.02	0	0	0			65	62	50	66	52	72			in EWC
Chr 3	36701219	T	A	SNV	1	0	0	1	1	0			72	97	85	111	85	76			in EWC
Chr 3	37224808	G	A	SNV	0	0	1	0	0	0			95	109	91	106	119	118			in EWC
Chr 3	41899236	A	G	SNV	1	0	0	0	0	0			88	86	79	95	95	95			in EWC
Chr 3	42754597	A	G	SNV	0	1	0	0	0	0			105	97	84	116	105	91			in EWC
Chr 3	42847326	T	G	SNV	0	0	0	0.576	0	0			96	76	77	125	89	93			in EWC
Chr 3	42854995	G	T	SNV	0	0.0217391	0	0	0.438202	0			89	92	87	105	89	81			in EWC
Chr 3	46063356	A	G	SNV	0	0	1	0	0	0			87	78	95	67	97	92			in EWC
Chr 3	46165630	C	T	SNV	0	1	0	0	0	1			66	60	71	71	65	76			in EWC
Chr 3	47223649	T	C	SNV	0	0	0	0.472868	0	0			96	110	106	129	119	89			in EWC
Chr 3	47289191	A	C	SNV	0.605263	0	0	0	0	0			76	60	73	83	65	83			in EWC
Chr 3	48220665	C	A	SNV							0.490196	0							102	90	in EWC
Chr 3	48254069	G	T	SNV	0	0	0.55	0	0	0			88	80	80	82	83	77			in EWC
Chr 3	50119634	T	G	SNV	1	0	0.0113636	0.982906	1	0			113	123	88	117	117	102			in EWC
Chr 3	51332969	A	G	SNV							0	0.983871							79	62	in EWC
Chr 3	51357156	C	G	SNV	0	0	0	0.419753	0	0			67	75	78	81	65	80			in EWC
Chr 3	52137933	C	A	SNV	0	0	1	0	0	0			109	96	101	115	99	111			in EWC
Chr 3	55335070	G	C	SNV	0.434783	0	0	0	0.00917431	0			69	91	114	75	109	86			in EWC
Chr 3	55939498	C	CA	INDEL							0	0.455285							126	123	in EWC
Chr 3	56320955	C	T	SNV	0	0	0	0	0.533333	0			51	67	73	74	75	77			in EWC
Chr 3	56701676	C	T	SNV	0	0	0	0	0.00892857	0.5			108	115	130	127	112	108			in EWC
Chr 3	56797252	C	A	SNV	0	0	0	0	0	1			76	66	86	84	89	90			in EWC
Chr 3	56988367	T	C	SNV							0	0.545455							83	99	in EWC
Chr 3	57441076	T	A	SNV	0	0	0	0.457143	0	0			95	92	89	105	127	96			in EWC
Chr 3	57444420	C	T	SNV	0	0	0	0	0.610526	0			89	90	98	75	95	72			in EWC
Chr 3	59458020	C	T	SNV	0	0	0	0.01	1	0			88	88	103	100	115	75			in EWC
Chr 3	61534525	A	T	SNV	0	0	0	0	0.424528	0			100	86	77	81	106	85			in EWC
Chr 3	63160260	G	A	SNV	0	0	1	0	0	0.0113636			84	75	93	116	106	88			in EWC
Chr 3	64342198	G	A	SNV	0	0	0	0.452991	0	0			103	105	110	117	86	114			in EWC
Chr 3	64744467	C	A	SNV	0	0	0	0	0	1			112	102	82	101	102	120			in EWC
Chr 3	67692260	T	A	Multisite	0.510638	0	0	0	0	0			94	82	68	79	93	89			in EWC
Chr 3	67692263	A	G	Multisite	0.510638	0	0	0	0	0			94	83	69	78	93	86			in EWC
Chr 3	67692278	C	T	Multisite	0.515464	0	0	0	0	0			97	84	71	76	88	80			in EWC
Chr 3	69123556	CA	C	INDEL	0	0	0	1	0	0			110	111	102	124	125	107			in EWC
Chr 3	71579037	G	T	SNV	0	0	0	1	0	0			103	70	93	96	85	102			in EWC
Chr 3	72441682	CA	C	INDEL	0	0	0	1	0	0			102	110	97	127	136	121			in EWC
Chr 3	73478596	G	A	SNV	0	0.53125	0	0	0	0			112	96	136	106	114	125			in EWC
Chr 3	75034675	T	C	SNV	0	0	0	0	0	0.545455			72	81	82	93	91	88			in EWC
Chr 3	75640494	T	G	SNV	0.535714	0	0	0	0	0			84	100	96	112	95	98			in EWC
Chr 3	76715494	A	T	SNV	0	0	0	0	0	0.479452			86	79	92	82	69	73			in EWC
Chr 3	77048062	G	A	SNV	0	0	1	0	0	0			102	101	91	140	124	125			in EWC
Chr 3	78087092	C	T	SNV	0	1	1	0.00970874	0	1			79	103	90	103	101	106			in EWC
Chr 3	78125220	G	A	SNV	0	0	0	0	0.392857	0			60	77	87	78	56	86			in EWC
Chr 3	79417808	TTTAC	T	INDEL							1	0							92	112	in EWC
Chr 3	79876584	C	A	SNV	1	0	0	0	0	0.00980392			97	106	89	113	95	102			in EWC
Chr 3	80875101	A	C	SNV							0.0113636	0.352941							88	68	in EWC
Chr 3	82291082	C	T	SNV							1	0							80	81	in EWC
Chr 3	86253463	C	A	SNV	0.988095	0	0.00775194	0	0.00917431	0			84	123	129	124	109	101			in EWC
Chr 3	86311067	C	T	SNV	0	1	0	0	0	0			71	69	59	72	71	67			in EWC
Chr 3	89015419	A	T	SNV	0	0	0	1	0	0			88	111	89	78	73	72			in EWC
Chr 3	89750805	C	T	SNV	0	0	0	0	0.46087	0			72	93	81	86	115	97			in EWC
Chr 3	93354789	T	C	SNV	0	0.0107527	0.0140845	0.969231	0	0			78	93	71	65	81	75			in EWC
Chr 3	96185511	C	G	SNV							0.486486	0							74	62	in EWC
Chr 3	96528375	G	A	SNV	0	0	0	0	0	0.98913			83	87	66	65	72	92			in EWC
Chr 3	96628860	G	A	SNV	0	0	0	0	0	0.447059			90	109	101	91	70	85			in EWC
Chr 3	96950620	A	G	SNV	0	0	0	0	1	0			106	104	115	108	117	109			in EWC
Chr 3	97106771	T	G	SNV	1	0	0	0	0	0			73	91	72	111	74	94			in EWC
Chr 3	100458032	A	G	SNV	0	0	1	0	0	0			97	92	79	92	95	73			in EWC
Chr 3	104350557	C	T	SNV	0	1	0	0	0.0142857	1			47	76	86	78	70	66			in EWC
Chr 3	105024456	C	T	SNV	1	0	0	1	1	0			62	89	72	75	86	86			in EWC
Chr 3	105590088	G	A	SNV	0	0	0	0	1	0			80	96	99	95	89	84			in EWC
Chr 3	105694006	C	T	SNV	0	0	0	0	0	0.537037			82	117	106	87	96	108			in EWC
Chr 3	107252457	A	C	SNV	1	0	0	1	1	0.02			84	93	97	84	87	100			in EWC
Chr 3	107945172	C	T	SNV	0	0	0.485149	0	0	0			106	80	101	110	106	110			in EWC
Chr 3	109557546	G	A	SNV	0	0	0.578431	0	0	0			82	89	102	73	86	82			in EWC
Chr 3	110617077	G	A	SNV	0	0	0	0	1	0			65	81	80	99	102	82			in EWC
Chr 3	110692717	C	T	SNV							1	0							105	104	in EWC
Chr 3	111859395	G	A	SNV	1	0	0.0116279	0	0	0			98	98	86	110	75	94			in EWC
Chr 3	112815814	T	A	SNV	0	0	1	0	0	0			104	107	82	107	94	91			in EWC
Chr 3	113828890	G	A	SNV	0	1	0	0	0	0			95	89	103	107	81	82			in EWC
Chr 3	114600083	G	A	SNV	0	0	1	0	0	0			87	97	88	108	86	109			in EWC
Chr 3	117402697	C	T	SNV	1	0	0	0	0	0			24	57	56	68	48	53			in EWC
Chr 3	120262501	C	T	SNV	0	0	0	0	1	0			93	106	91	101	112	98			in EWC
Chr 3	120462607	C	A	SNV	0	0	1	0.0163934	0	0			102	105	104	122	142	120			in EWC
Chr 3	120996783	A	T	SNV	0	0	1	0	0	0			73	77	55	78	79	74			in EWC
Chr 3	121545920	A	T	SNV	0	0	0	0	1	0			92	118	104	96	85	95			in EWC
Chr 3	123232364	G	A	SNV	1	0	0	0	0	0			60	74	96	73	87	76			in EWC
Chr 3	124740644	C	T	SNV	0	0	0.0106383	1	0.00869565	0			87	104	94	113	115	80			in EWC
Chr 3	126587588	C	A	SNV							0	0.512821							112	117	in EWC
Chr 3	126821791	G	T	SNV	0	0	0	0	0.00900901	1			93	96	108	104	111	69			in EWC
Chr 3	128471170	C	T	SNV	0	1	0	0	0	1			84	97	72	99	100	91			in EWC
Chr 3	130685821	C	T	SNV	0	0	0	0	0	0.376471			73	87	73	77	83	85			in EWC
Chr 3	130732294	C	T	SNV	1	0	0	0	0	0			80	90	77	83	96	98			in EWC
Chr 3	131214433	C	T	SNV	0	0	0	0	0	0.448276			68	80	80	91	79	87			in EWC
Chr 3	133400030	C	T	SNV	0	0	1	0	0	0			97	93	92	91	82	81			in EWC
Chr 3	136857050	G	T	SNV	0	0	1	0	0	0			103	113	111	117	111	89			in EWC
Chr 3	139083032	T	A	SNV	0.0123457	0.00925926	1	0	0	0			81	108	102	107	107	89			in EWC
Chr 3	139196792	C	T	SNV							0	0.992							110	125	in EWC
Chr 3	141363849	G	A	SNV	0	0	0	0	0	0.985915			72	88	91	89	105	71			in EWC
Chr 3	143213713	A	T	SNV	1	0	0	0	0	0			78	75	99	95	82	90			in EWC
Chr 3	143298191	A	C	SNV	0	0	0	0	0	0.981651			100	102	107	129	128	109			in EWC
Chr 3	143572335	G	A	SNV	0	0	0.584416	0	0	0			78	90	77	87	89	86			in EWC
Chr 3	144678716	G	A	SNV	0	0	0	0	0.53012	0			83	70	81	67	83	60			in EWC
Chr 3	144836786	C	G	SNV	0	0	0	0	0.434211	0			77	89	74	77	76	81			in EWC
Chr 3	144967966	C	T	SNV	0	0	1	0	0	0			108	100	87	121	119	109			in EWC
Chr 3	145701770	TA	T	Multisite	0.0126582	0	0	0	0	1			79	87	95	86	110	79			in EWC
Chr 3	145701772	G	C	Multisite	0.0126582	0	0	0	0	1			79	87	95	86	110	79			in EWC
Chr 3	147385368	C	A	SNV	0	0	0	0	0.425532	0			94	96	118	119	94	97			in EWC
Chr 3	148933315	G	A	SNV	0	0	0	0	0.490385	0			108	93	109	126	104	121			in EWC
Chr 3	149732748	G	A	SNV	0	0	0.00892857	0	0.518182	0			99	88	112	121	110	114			in EWC
Chr 3	150495399	T	TA	Multisite	0	0	0	0	0	1			118	121	93	118	102	102			in EWC
Chr 3	150495402	T	TAAA	Multisite	0	0	0	0	0	1			116	121	92	118	102	100			in EWC
Chr 3	150495403	G	A	Multisite	0	0	0	0	0	1			116	121	93	115	101	99			in EWC
Chr 3	151853981	G	A	SNV							0.455556	0							90	105	in EWC
Chr 3	152028845	C	T	SNV	0	0	0	0	0.508772	0			64	65	59	86	57	47			in EWC
Chr 3	153401880	G	A	SNV							0	0.542373							57	59	in EWC
Chr 3	154770420	C	T	SNV							0	1							98	93	in EWC
Chr 3	154986183	C	T	SNV	0	0.40625	0	0	0	0			108	96	102	118	103	100			in EWC
Chr 3	156111275	C	G	SNV	0	0	0.574257	0	0	0			104	98	101	120	124	120			in EWC
Chr 3	156842313	G	A	SNV	0	0	0	0	0	1			85	110	113	129	125	116			in EWC
Chr 3	158022243	C	T	SNV	0.0111111	0	0	1	1	0			90	106	116	116	102	93			in EWC
Chr 3	158596828	C	T	SNV	0	0	0	0	0	1			94	92	77	100	110	105			in EWC
Chr 3	158959461	GAAGA	G,GAAGAAAGA	INDEL							0.404762	0							42	40	in EWC
Chr 3	159385267	G	A	SNV	0	0.989247	0	0	0	1			102	93	98	87	92	83			in EWC
Chr 3	159571112	T	C	SNV	0	0	0	0.548077	0	0			89	85	85	104	63	103			in EWC
Chr 4	3508822	C	T	SNV	0	0	0	0	0.478261	0			75	96	109	121	115	119			in EWC
Chr 4	3745805	T	A	SNV	0	0	0	1	1	0			111	122	104	122	84	93			in EWC
Chr 4	5104404	T	G	SNV	0	0	0	0	0.546512	0			81	75	90	93	86	86			in EWC
Chr 4	5998527	C	T	SNV							0.469136	0.517647							81	85	in EWC
Chr 4	7433768	G	A	SNV							0.43299	0.00970874							97	103	in EWC
Chr 4	7568809	C	T	SNV	0.509259	0	0	0	0	0			108	110	101	125	149	116			in EWC
Chr 4	7722814	C	T	SNV	0.628571	0	0	0	0	0			70	92	81	80	88	107			in EWC
Chr 4	9428614	G	A	SNV	0	0	0	0	0.515789	0			87	123	91	107	95	85			in EWC
Chr 4	11704646	T	A	SNV	0	1	0	0	0	1			76	89	83	105	97	86			in EWC
Chr 4	12110542	T	A	SNV	0	0	1	0	0	0			72	74	97	79	75	83			in EWC
Chr 4	12360097	G	A	SNV	0	1	0	0	0	1			102	94	63	86	95	97			in EWC
Chr 4	13001515	G	T	SNV	1	0	0	0	0.0117647	0			89	93	85	85	85	96			in EWC
Chr 4	14555217	C	T	SNV	1	0	0	0	0	0			82	91	88	99	110	84			in EWC
Chr 4	15902689	G	A	SNV	0	0.0186916	0.535354	0.00833333	0.0238095	0			81	107	99	120	126	114			in EWC
Chr 4	16244163	C	G	SNV							0	0.5							105	110	in EWC
Chr 4	16420612	T	C	SNV	0	0	0	0.485437	0	0			110	107	103	103	115	118			in EWC
Chr 4	17367902	G	A	SNV	0.551282	0	0	0	0	0			78	93	101	91	82	95			in EWC
Chr 4	18344049	G	A	SNV							0.566038	0							106	103	in EWC
Chr 4	18842045	A	G	SNV							0	0.540541							107	111	in EWC
Chr 4	19325584	A	C	SNV	0	0	1	0	0	0			104	108	108	127	96	82			in EWC
Chr 4	20361762	GC	G	INDEL	0	0	0	0	1	0			98	91	84	93	106	103			in EWC
Chr 4	21072936	C	T	SNV							0.520548	0							73	90	in EWC
Chr 4	21959891	C	T	SNV	0.0125	0.342342	0	0	0	0			80	111	93	106	118	106			in EWC
Chr 4	23061810	T	G	SNV	0	0	0	0	0.613333	0			98	72	99	122	75	89			in EWC
Chr 4	23940214	C	T	SNV	0	0	0	0	0.4875	0			86	84	89	121	80	122			in EWC
Chr 4	24423251	G	C	SNV	0	0	0	0	0	1			82	78	82	82	90	74			in EWC
Chr 4	26130183	G	A	SNV	0	0	0	0	0	0.556818			73	69	92	92	82	88			in EWC
Chr 4	26830466	T	A	SNV	1	0	0	0	0	0			59	76	87	89	87	73			in EWC
Chr 4	27526473	A	G	SNV	0	0	0	1	0	0			104	121	105	127	126	110			in EWC
Chr 4	28182068	T	C	SNV	0	0	0.4	0	0	0			64	73	75	88	89	81			in EWC
Chr 4	28484897	G	A	SNV	0	0	0	0	0	1			74	107	102	78	93	96			in EWC
Chr 4	28950548	G	A	SNV	0.45098	0	0	0	0	0			102	92	77	110	116	82			in EWC
Chr 4	30422878	G	A	SNV							0.540984	1							122	118	in EWC
Chr 4	34130941	G	A	SNV	0.485714	0	0	0	0	0			70	96	79	107	84	91			in EWC
Chr 4	35206204	G	A	SNV	0	0	1	0	0	0			106	84	87	83	103	79			in EWC
Chr 4	35758844	C	T	SNV	0	0	0.00819672	0	0.495726	0.00854701			114	112	122	127	117	117			in EWC
Chr 4	36752078	G	T	SNV	0	0	0.460674	0	0	0			86	97	89	132	116	100			in EWC
Chr 4	38049914	C	A	SNV	0	0	0	0	0	0.504854			78	78	90	94	95	103			in EWC
Chr 4	38288200	C	T	SNV	1	0	0	0	0	0			93	102	90	88	91	85			in EWC
Chr 4	43015809	G	A	SNV	0	0	0	0	0.555556	0			72	76	79	61	81	85			in EWC
Chr 4	43907028	G	A	SNV	0	0	0	0	0.00793651	0.439655			106	95	98	114	126	116			in EWC
Chr 4	44812089	C	T	SNV	1	0	0	0	0	0			104	117	110	134	131	118			in EWC
Chr 4	45358212	T	G	Multisite	1	0	0	0	0	0			55	70	92	100	94	95			in EWC
Chr 4	45358213	G	C	Multisite	1	0	0	0	0	0			60	70	91	100	94	93			in EWC
Chr 4	45387366	G	A	SNV							0	0.517241							79	87	in EWC
Chr 4	46226767	C	T	SNV	0	0	0	0	0.552632	0			82	88	97	94	76	74			in EWC
Chr 4	46425438	G	A	SNV	0	0	0.0136986	0	0	1			100	110	73	104	93	91			in EWC
Chr 4	47631182	T	C	SNV	0	0	0	0	0.536	0			83	132	94	98	125	103			in EWC
Chr 4	49319490	C	T	SNV	0	0	0	1	0	0			75	76	100	84	98	87			in EWC
Chr 4	50808498	A	G	SNV	0	0	0	0	0	0.50495			73	79	91	95	102	101			in EWC
Chr 4	53596744	C	T	SNV	0	1	0	0	0	0			100	81	91	89	108	91			in EWC
Chr 4	54163637	G	A	SNV	0	1	0	0	0	0			75	72	89	84	85	81			in EWC
Chr 4	54775541	TC	T	INDEL	0	1	0	0	0	0			92	84	102	112	92	89			in EWC
Chr 4	54910158	G	A	SNV	0	0	1	0	0	0			104	107	116	110	110	104			in EWC
Chr 4	59124749	C	A	SNV	0	0	1	0	0	0			112	69	107	101	69	101			in EWC
Chr 4	63539366	G	A	SNV							0.455696	0							79	92	in EWC
Chr 4	65259292	T	C	SNV	0	0.54	0	0	0	0			79	100	100	94	88	62			in EWC
Chr 4	66376008	G	T	SNV	0.396825	0.346154	0	0	0	0.97561			63	52	83	92	70	41			in EWC
Chr 4	66421823	TA	T	INDEL	0	0.482759	0	0	0	0			75	87	82	88	77	88			in EWC
Chr 4	67436246	C	T	SNV	0	0	1	0	0	0			83	101	83	84	90	95			in EWC
Chr 4	68389994	G	A	SNV	0	0.522124	0	0	0	0			96	113	102	112	125	107			in EWC
Chr 4	69147985	T	C	SNV							0.536585	0							82	87	in EWC
Chr 4	69652014	C	G	SNV	0	0	0.457447	0	0	0			95	83	94	100	90	96			in EWC
Chr 4	70247585	T	G	SNV							0.0119048	0.5							84	80	in EWC
Chr 4	70873109	A	T	SNV	0	0	1	0	0	0			113	79	86	104	81	95			in EWC
Chr 4	71567931	T	C	Multisite	0	0	1	0	0	0			97	102	87	93	103	76			in EWC
Chr 4	71567932	T	C	Multisite	0	0	1	0	0	0			96	102	87	93	104	77			in EWC
Chr 4	73574656	G	C	SNV	0	0	0	0	0	1			80	85	70	95	66	92			in EWC
Chr 4	74298770	C	T	SNV							0.509434	0							106	104	in EWC
Chr 4	77008481	A	G	SNV	0	0.00840336	0	0	1	0			99	119	110	101	124	108			in EWC
Chr 4	78136059	G	T	SNV	0	0	0	0	0.506849	0			90	66	79	83	73	81			in EWC
Chr 4	79713834	C	G	SNV	0	0.493506	0	0	0	1			74	77	88	85	101	92			in EWC
Chr 4	79994922	G	A	SNV	0.987342	0	0	0.00840336	0	0			79	95	85	119	95	89			in EWC
Chr 4	80340578	A	C	SNV	0	0.532609	0	0	0	1			77	92	92	97	74	89			in EWC
Chr 4	81092120	G	T	SNV	0	0.59596	0	0	0.00934579	0			103	99	87	105	107	96			in EWC
Chr 4	81169829	T	C	SNV							0	0.39							84	100	in EWC
Chr 4	81809795	C	A	SNV	0	0	0	0	0.442857	0			88	66	81	71	70	96			in EWC
Chr 4	81881617	G	C	SNV	0.519608	0	0	0	0	0.0126582			102	85	79	111	71	79			in EWC
Chr 4	83651038	A	G	SNV	0.0136986	0.610526	0	0	0	0			73	95	114	94	90	84			in EWC
Chr 4	84000334	T	A	SNV	0	0.492958	0	0	0	0			63	71	76	81	79	71			in EWC
Chr 4	85316383	C	T	SNV	0.012987	0	0	0	0	1			77	93	82	113	96	102			in EWC
Chr 4	85763245	G	A	SNV	0.0108696	0.570093	0	0	0	1			92	107	97	122	106	95			in EWC
Chr 4	87379604	ATATAT	A	INDEL	0	0	1	0	0	0			97	103	86	103	98	79			in EWC
Chr 4	87421972	C	T	SNV	0	0.571429	0	0	0	0			74	63	85	97	85	75			in EWC
Chr 4	88320080	C	G	SNV							0.465116	0							86	104	in EWC
Chr 4	88938922	C	T	SNV	1	1	0	1	1	1			82	86	115	99	101	88			in EWC
Chr 4	91702501	C	T	SNV	0	0	0	1	0	0			81	74	81	93	78	94			in EWC
Chr 4	92072189	G	A	SNV	0	0	0.0103093	1	0	0			77	93	97	130	100	105			in EWC
Chr 4	92166821	G	A	SNV							0.425532	0							94	97	in EWC
Chr 4	92795778	G	A	SNV							1	0.00806452							86	124	in EWC
Chr 4	92917335	C	T	SNV	1	0	0	0	0	0			78	54	69	90	61	83			in EWC
Chr 4	93787772	C	T	SNV	1	0	0	0	1	0			78	79	85	105	96	84			in EWC
Chr 4	95919699	G	A	SNV	0	0	1	0	0	0			85	98	98	104	121	77			in EWC
Chr 4	98119214	C	T	SNV	0	0.42268	0	0	0	0			88	97	112	98	95	107			in EWC
Chr 4	103179817	C	T	SNV	0	0.54902	0	0	0	0			85	102	84	82	74	81			in EWC
Chr 4	103413867	C	T	SNV	0	0	0	1	0	0			86	96	91	123	105	123			in EWC
Chr 4	103503214	C	T	SNV							0.539216	0							102	89	in EWC
Chr 4	104902682	T	C	SNV	1	0.535714	0	1	1	1			103	112	113	97	107	120			in EWC
Chr 4	105158324	C	G	SNV	0	0	1	0	0	0			87	87	88	82	106	92			in EWC
Chr 4	105859733	G	A	SNV	0	0	1	0	0	0			107	97	86	93	98	98			in EWC
Chr 4	108854245	G	A	SNV	1	0.554054	0	1	1	1			78	74	80	96	84	93			in EWC
Chr 4	109828283	C	T	SNV	1	0	0	0	0	0.00869565			117	110	117	103	125	115			in EWC
Chr 4	110821853	G	C	SNV	0.472222	0	0	0	0	0			108	115	99	128	118	111			in EWC
Chr 4	113886461	G	T	SNV	0	0	1	0	0	0			114	111	126	117	143	110			in EWC
Chr 4	114400550	A	G	SNV	0	0	0	0.464646	0	0			65	84	96	99	98	106			in EWC
Chr 4	115816951	C	T	SNV	0	0	0	0	0	1			81	95	80	80	68	75			in EWC
Chr 4	115875740	G	A	SNV	1	0	0	0	0	0			86	102	79	94	107	81			in EWC
Chr 4	116975309	C	T	SNV	0	0	1	0	0	0			66	104	96	74	71	78			in EWC
Chr 4	118949669	C	G	SNV	0	0	0	0	0.447368	0			59	72	72	77	76	64			in EWC
Chr 4	121543118	T	A	SNV	0	0	0	0	1	0			82	71	93	85	71	93			in EWC
Chr 4	122040917	C	T	SNV	0.473988	0	0	0.486339	0.560976	0			173	170	192	183	164	176			in EWC
Chr 4	123180392	C	T	SNV	0	0.43	0	0	0	0			80	100	91	102	95	105			in EWC
Chr 4	123514827	A	C	SNV	0	0	0	0	0	1			114	140	114	125	130	124			in EWC
Chr 4	125996374	AGT	A	Multisite	0	0	1	0	0	0			78	68	87	97	76	85			in EWC
Chr 4	125996377	C	CACTAA	Multisite	0	0	1	0	0	0			78	67	87	97	76	86			in EWC
Chr 4	127139058	G	T	SNV	0.0181818	0	0	0	0	0.56			55	57	58	48	55	50			in EWC
Chr 4	127956663	G	C	SNV	0	0	0	1	0	0			81	94	106	85	99	62			in EWC
Chr 4	128112824	G	A	SNV	0	0.424658	0	0.0114943	0	0			78	73	86	87	95	92			in EWC
Chr 4	131604210	G	A	SNV	0	0	0	0	0.564103	0			73	95	79	75	78	63			in EWC
Chr 4	133438457	C	T	SNV	0	0	0.40625	0	0	0			73	60	64	70	68	64			in EWC
Chr 4	133790498	A	T	SNV							1	0.538462							76	78	in EWC
Chr 4	134478047	G	A	SNV	0	0	1	0	0	0			77	95	106	75	91	88			in EWC
Chr 4	134793371	G	T	SNV							0.988889	0							90	100	in EWC
Chr 4	136312498	C	T	SNV	0.433735	0	0	0	0	0			83	97	96	108	112	87			in EWC
Chr 4	137591548	T	G	SNV	0.672727	0	0	0	0	0			55	56	98	80	70	63			in EWC
Chr 4	138075551	C	A	SNV	0	0	0	0.555556	0	0			74	92	79	81	87	84			in EWC
Chr 4	140178561	T	C	SNV	0	0	0.515152	0	0	0			78	60	99	65	69	59			in EWC
Chr 4	140591554	C	T	SNV	0	0	0	0	0	0.515152			81	104	108	71	80	99			in EWC
Chr 4	141245052	C	T	SNV	0.987805	0	0	0	0	0			82	83	108	78	90	96			in EWC
Chr 4	142492968	A	C	SNV	0	0	0	0	0	1			76	79	99	95	86	87			in EWC
Chr 4	144772813	T	A	SNV	0	0	0	0	0	1			83	77	90	90	75	95			in EWC
Chr 4	145003663	G	A	SNV	0	0	0	0	1	0			113	104	138	126	97	106			in EWC
Chr 4	148525600	T	G	SNV	0.987805	0	0	0	0	0			82	90	84	95	87	93			in EWC
Chr 4	150306186	A	C	SNV	0	0	0	0	0	1			93	82	90	85	89	98			in EWC
Chr 4	150389217	G	A	SNV	0	0	0	0	1	0			79	78	90	95	92	101			in EWC
Chr 4	150436514	G	A	SNV	0	1	0	0	0	1			86	120	93	109	90	108			in EWC
Chr 4	151969637	T	C	SNV	0	0	0.464789	0	0	0			89	86	71	81	85	98			in EWC
Chr 4	152250178	G	A	SNV	0	0	0	0.542056	0	0			87	99	108	107	102	93			in EWC
Chr 4	152347923	C	T	SNV	0	0	0.461538	0	0	0			49	68	78	74	68	75			in EWC
Chr 4	152835096	C	T	SNV							1	0							89	77	in EWC
Chr 4	153688184	A	G	SNV	0	0	0	0	1	0			64	87	85	78	76	57			in EWC
Chr 4	154635801	G	A	SNV	1	0	0	0	0	0			80	93	90	71	86	99			in EWC
Chr 4	154683400	T	G	SNV	0	0	0	0.511905	0	0			79	86	114	84	79	75			in EWC
Chr 4	155217908	C	T	SNV	0	0	1	0	0	0			86	82	76	79	91	71			in EWC
Chr 4	155343512	G	A	SNV							0	0.58427							82	89	in EWC
Chr 5	3448597	G	A	SNV	0	0	1	0	0	0.00925926			91	94	86	98	106	108			in EWC
Chr 5	6817537	T	A	SNV	0	0.981132	0	0	0	0.98			78	53	94	97	97	50			in EWC
Chr 5	7050382	C	T	SNV	0.0105263	0	0.53719	0	0	0			95	79	121	122	116	90			in EWC
Chr 5	9605406	C	G	SNV	1	0	0	0	0	0.01			83	85	76	90	82	100			in EWC
Chr 5	10527335	T	G	SNV	0	0	0.412281	0	0	0			113	109	114	149	85	101			in EWC
Chr 5	10620313	G	A	SNV	0	0	0	1	0	0			94	84	98	115	115	104			in EWC
Chr 5	10802634	C	T	SNV	1	0	0	1	1	0			76	90	80	88	68	99			in EWC
Chr 5	12342577	T	G	SNV	0.519608	0	0	0	0	0			102	107	124	127	135	109			in EWC
Chr 5	14402652	A	G	SNV	0	0	0	0	0	0.540541			105	89	107	121	102	111			in EWC
Chr 5	15921066	A	T	SNV	0	0	1	0	0	0			70	68	74	106	89	77			in EWC
Chr 5	16441785	G	T	SNV	0	0	0	0	0	0.433962			96	87	112	116	111	106			in EWC
Chr 5	16962735	C	A	SNV	1	0	0	0	0	0			62	69	73	52	82	72			in EWC
Chr 5	18003353	C	T	SNV							0.516484	0							91	107	in EWC
Chr 5	18980289	AG	A	INDEL	0	0	0	0	0	0.473118			99	83	93	107	94	93			in EWC
Chr 5	21554206	G	T	SNV	0	0.570093	0	0	0	0			109	107	98	101	114	117			in EWC
Chr 5	24671304	G	A	SNV	1	0	0	0	0	0			97	98	76	105	98	117			in EWC
Chr 5	27417041	A	G	SNV							1	0							78	60	in EWC
Chr 5	27528084	A	C	SNV	0.449275	0	0	0	0	0			69	76	100	87	92	81			in EWC
Chr 5	29553202	C	T	SNV	1	0	0	1	0	0			77	90	74	75	90	78			in EWC
Chr 5	30533568	A	G	SNV	0.493671	0	0	0	0	0			79	71	92	86	79	76			in EWC
Chr 5	30776385	A	C	SNV							0	0.986301							97	73	in EWC
Chr 5	34349090	G	T	SNV	0	0	0	0	0.452055	0			80	78	86	87	73	75			in EWC
Chr 5	36827417	C	T	SNV	1	0	0	0	0	0			83	84	81	83	78	100			in EWC
Chr 5	41037078	G	A	SNV	0	0	0	0	0	1			100	115	110	128	139	106			in EWC
Chr 5	41409446	G	A	SNV	0	0	0	0	0.462264	0			67	96	99	73	106	75			in EWC
Chr 5	42990828	G	A	SNV							0	1							116	98	in EWC
Chr 5	43159808	C	A	SNV	0	0	0	0	0	0.972222			80	117	108	72	104	72			in EWC
Chr 5	44937152	A	T	SNV	0	0	0	0	0.460938	0			98	91	82	128	128	96			in EWC
Chr 5	46855493	G	A	SNV	0	0	0.416667	0.00909091	0	0			85	84	84	110	104	91			in EWC
Chr 5	47069048	G	A	SNV	0	0.529412	0	0	0	0			93	85	98	96	93	106			in EWC
Chr 5	47184802	C	T	SNV	0	0	0	0	0	1			76	66	81	79	54	74			in EWC
Chr 5	47696206	C	T	SNV							0.00900901	0.992366							111	131	in EWC
Chr 5	49168993	C	A	SNV							0.484127	0							126	111	in EWC
Chr 5	50445516	G	A	SNV	0.425532	0	0	0	0	0			94	103	107	120	101	95			in EWC
Chr 5	51641671	CCACTT	C	INDEL	0	0.521008	0	0	0	0			109	119	87	133	124	93			in EWC
Chr 5	55400542	A	G	SNV	0	0	1	0	0	0			79	97	86	91	90	79			in EWC
Chr 5	56070349	C	A	SNV	0	0.47619	0	0	0	0			69	84	78	95	69	109			in EWC
Chr 5	57015862	T	A	SNV	1	0	0	0	0	0			60	53	61	56	67	60			in EWC
Chr 5	57072396	T	G	SNV							0	1							112	94	in EWC
Chr 5	57468105	C	T	SNV	0	0.505155	0	0	0	0			93	97	96	97	88	111			in EWC
Chr 5	57823678	G	C	SNV							0	0.965517							93	87	in EWC
Chr 5	58220378	T	C	SNV	0	0	0	0	0.989011	0			81	114	109	125	91	87			in EWC
Chr 5	59137904	A	T	Multisite	0.486842	0	0	0	0	0			76	99	115	118	118	87			in EWC
Chr 5	59137906	A	AGAGAGCTTGAT	Multisite	0.486842	0	0	0	0	0			76	99	114	116	120	88			in EWC
Chr 5	61664723	C	T	SNV							1	1							84	94	in EWC
Chr 5	62262688	T	C	SNV	0	0	0	1	0	0			110	109	99	118	83	96			in EWC
Chr 5	62426682	C	A	SNV	0.0149254	0	0	0.0104167	0	1			67	92	80	96	70	74			in EWC
Chr 5	63114605	C	T	SNV	0	0	0.01	0	0	1			86	107	100	88	114	96			in EWC
Chr 5	65112811	T	A	SNV							1	0.988889							97	90	in EWC
Chr 5	66805062	G	A	SNV	0	1	0	0	0	1			86	82	81	77	90	81			in EWC
Chr 5	67786928	G	A	SNV	0.485149	0	0	0	0	0			101	114	96	115	110	115			in EWC
Chr 5	69173424	G	C	SNV							0	1							113	89	in EWC
Chr 5	70291081	T	G	SNV	0	0	1	0	0	0			87	89	77	111	100	94			in EWC
Chr 5	71413390	T	A	SNV	0	0	0	1	0	0			96	69	82	100	89	90			in EWC
Chr 5	71865913	G	A	SNV	0	0	1	0	0	0			85	69	84	98	82	89			in EWC
Chr 5	73343317	C	T	SNV	0	1	0	0	0	0			68	83	82	94	72	80			in EWC
Chr 5	73690983	TG	T	INDEL	0	1	0	0	0	0			88	106	97	94	93	79			in EWC
Chr 5	74040303	A	T	SNV	0	0	0	0	0	0.556701			81	85	91	105	106	97			in EWC
Chr 5	74232535	C	T	SNV	0	0	0	1	0	0			86	101	113	120	115	111			in EWC
Chr 5	74783304	A	T	SNV	0	0	1	0	0	0			67	76	83	81	82	96			in EWC
Chr 5	74810929	C	T	SNV	0	0	0	0	0.504762	0			87	71	128	106	105	113			in EWC
Chr 5	76179379	C	T	SNV							1	0							100	93	in EWC
Chr 5	76687793	G	A	SNV	0	0	0	0	0	1			78	104	100	95	83	79			in EWC
Chr 5	77918069	C	A	SNV							0	0.484536							92	97	in EWC
Chr 5	78022633	G	T	SNV	0	0	0	1	0	0			92	100	120	104	123	122			in EWC
Chr 5	78406813	A	G	SNV	0	0	0	0	0	0.976744			84	74	72	95	104	86			in EWC
Chr 5	78559223	G	T	SNV	0	0	0	0	0	0.567568			98	82	84	101	108	111			in EWC
Chr 5	78769891	A	C	SNV	0.433333	0	0	0	0	0			90	110	87	112	98	113			in EWC
Chr 5	81752988	T	G	SNV	0	0	1	0	0	0			116	109	137	138	132	113			in EWC
Chr 5	81891399	T	A	SNV							0.47541	0							122	123	in EWC
Chr 5	82710429	C	T	SNV	0	0	0	0	0.473684	0			90	101	104	111	114	98			in EWC
Chr 5	83683259	GAAGGC	G	INDEL							1	0							97	108	in EWC
Chr 5	83802054	G	A	SNV							0	0.493506							73	77	in EWC
Chr 5	85608874	C	T	SNV	0	0	1	0	0	0			102	117	86	126	124	101			in EWC
Chr 5	85796670	G	T	SNV	0.393939	0	0	0	0	0			99	84	73	100	98	90			in EWC
Chr 5	86651213	ATTCTTTGTGTCG	A	INDEL	0	0	0	1	0	0			94	96	101	80	84	92			in EWC
Chr 5	88043685	A	G	SNV							0	0.438095							86	105	in EWC
Chr 5	88853880	G	A	SNV	1	0	0	0	1	0			94	82	76	91	89	88			in EWC
Chr 5	90051963	A	G	SNV	0.463918	0	0	0	0	0.0103093			97	109	114	90	99	97			in EWC
Chr 5	90883679	G	C	SNV							0	0.6							87	80	in EWC
Chr 5	90890894	C	T	SNV	0	0	0	0	0	0.521739			63	87	95	87	71	92			in EWC
Chr 5	92330132	C	T	SNV							0.990826	0							109	87	in EWC
Chr 5	96094308	C	G	SNV	0	1	0.00793651	0	0	0.495868			117	133	126	124	138	121			in EWC
Chr 5	96216227	A	C	SNV	0	0	0.988235	0	0	0.486842			89	103	85	95	113	76			in EWC
Chr 5	96912975	T	G	SNV	1	0	0	0	0	0			66	59	97	82	79	78			in EWC
Chr 5	97584776	G	A	SNV							0.550459	0							109	110	in EWC
Chr 5	98226044	C	A	SNV	0	0	0	1	0	0.0212766			49	54	64	52	75	47			in EWC
Chr 5	99001548	A	T	SNV	0	0	0	0	1	0			100	111	103	107	108	95			in EWC
Chr 5	99152843	A	G	SNV	0	0	0	0	1	0			87	104	110	102	90	99			in EWC
Chr 5	99227459	G	T	SNV	0	1	1	0	0	1			102	89	100	99	106	93			in EWC
Chr 5	100310528	ACATACATG	A	INDEL	0	1	1	0	0	1			50	55	58	58	60	49			in EWC
Chr 5	102086679	T	C	SNV	0	0.988506	1	0.0113636	0	1			100	87	102	88	112	98			in EWC
Chr 5	102871657	C	T	SNV							0.448598	0.012987							107	77	in EWC
Chr 5	103160319	CT	C	INDEL	0.534653	0	0	0	0	0			101	97	102	105	113	96			in EWC
Chr 5	104255913	C	G	SNV	1	0	0	0	0	0			95	94	108	106	102	122			in EWC
Chr 5	110213607	C	T	SNV							1	0							117	103	in EWC
Chr 5	113647634	G	A	SNV	1	0	0	1	1	0			84	79	100	80	84	80			in EWC
Chr 5	113698148	G	C	SNV	0	0	0	0.552239	0	0			69	72	76	67	73	73			in EWC
Chr 5	114718958	G	A	SNV	0.467391	0	0	0	0	0			92	95	111	94	97	111			in EWC
Chr 5	117316392	C	T	SNV	0	1	1	0	0	1			70	65	90	68	76	83			in EWC
Chr 5	119551115	GCCACGTCT	G	INDEL	0	0	0	0.487179	0	0			106	87	107	78	88	110			in EWC
Chr 5	120576377	C	G	SNV							0.54717	0							53	63	in EWC
Chr 5	121171645	A	T	SNV	0.985915	0	0	0.984848	1	1			71	94	90	66	68	77			in EWC
Chr 5	121339852	G	A	SNV	0	0	0	0	1	0			94	91	105	117	103	86			in EWC
Chr 5	121490832	G	A	SNV	0	0	0	1	0	0			90	63	90	68	75	74			in EWC
Chr 5	122654316	C	T	SNV	0	0	0	0	0	1			98	77	99	92	80	108			in EWC
Chr 5	122874157	T	G	SNV							0.494624	0							93	106	in EWC
Chr 5	123709249	A	T	SNV							0	0.988764							96	89	in EWC
Chr 5	123805213	G	A	SNV							0	0.53125							93	96	in EWC
Chr 5	124454811	C	T	SNV	1	0	0	0	1	0			93	107	89	73	103	87			in EWC
Chr 5	124811576	G	A	SNV	0	0	0	0	0.0133333	1			77	69	94	96	75	70			in EWC
Chr 5	124895021	C	T	SNV	0	0	0	1	0	0			44	46	69	55	67	60			in EWC
Chr 5	126893482	C	T	SNV	0	0	1	0	0	0			66	92	94	87	91	83			in EWC
Chr 5	128446566	G	A	SNV	0	1	0	0	0	0			58	67	91	63	74	65			in EWC
Chr 5	128707447	G	C	SNV	0	0	0	0	0.432099	0			68	114	81	82	81	68			in EWC
Chr 5	133016860	C	T	SNV	0	0	0	0	0.578313	0			81	81	97	71	83	81			in EWC
Chr 5	133396607	T	A	SNV	0	0	1	0	0	0			99	79	100	94	92	101			in EWC
Chr 5	133894127	A	T	SNV	0	0.0151515	0	0.559322	0	0			66	66	74	59	72	76			in EWC
Chr 5	134260269	G	A	SNV							0	0.424242							86	99	in EWC
Chr 5	135416051	G	A	SNV	0	0	1	0	0	0			88	68	98	90	87	89			in EWC
Chr 5	136557615	C	A	SNV	0	0	0	0	0.518519	0			93	106	98	101	108	96			in EWC
Chr 5	137401914	C	T	SNV							1	0							79	72	in EWC
Chr 5	138410194	C	T	SNV	0	0	1	0	0	0			103	106	104	89	103	110			in EWC
Chr 5	141227580	A	C	SNV	0	0	0	0.985507	0	0			73	94	80	69	79	64			in EWC
Chr 5	142549088	TC	T	Multisite	0	0	0	0	1	0			67	104	95	91	90	107			in EWC
Chr 5	142549091	A	AT	Multisite	0	0	0	0	1	0			68	108	97	92	89	106			in EWC
Chr 5	143346294	G	A	SNV	0	0	0	1	0.0185185	0			63	68	71	76	54	64			in EWC
Chr 5	147188747	C	T	SNV	0.511628	0	0	0	0	0			86	89	80	75	74	80			in EWC
Chr 5	147423138	C	G	Multisite	1	0	0	0	0	0			80	88	80	94	99	92			in EWC
Chr 5	147423139	A	C	Multisite	1	0	0	0	0	0			80	87	80	94	99	90			in EWC
Chr 5	147528622	G	C	SNV	0	0	0	0	0	0.990909			107	116	84	116	115	110			in EWC
Chr 5	147788478	G	A	SNV	0	0	0	0.530864	0	0			77	80	96	81	65	73			in EWC
Chr 5	148317825	A	C	SNV	0	0	0	0.511364	0	0			80	71	73	88	97	89			in EWC
Chr 5	148368497	G	A	SNV	0	0	0.563636	0	0	0			52	51	55	65	58	53			in EWC
Chr 5	150170423	T	A	SNV	0	0	0	0	0	1			73	87	64	81	68	71			in EWC
Chr 6	3225853	T	C	SNV	0	0	1	0	0	0			92	88	95	102	84	87			in EWC
Chr 6	3890399	A	G	SNV	0	0.423913	0	0	0	0			77	92	102	115	127	84			in EWC
Chr 6	4099817	A	C	SNV	0	0	0	1	0	0			84	63	88	78	79	87			in EWC
Chr 6	4414853	A	C	SNV	1	0	0	1	1	0			94	90	114	123	105	108			in EWC
Chr 6	6673460	G	A	SNV	0	0.593407	0	0	0	0			111	91	101	128	93	90			in EWC
Chr 6	7440480	T	A	SNV	0	0	1	0.00917431	0	0			88	100	86	109	98	116			in EWC
Chr 6	10275265	G	T	SNV	0	0	0	0	0	0.484848			95	102	79	106	87	99			in EWC
Chr 6	11359421	C	A	SNV	0	0	1	0	0	0			96	80	90	90	102	82			in EWC
Chr 6	12980457	A	G	SNV	0	0	0	0.484127	0	0			110	108	97	126	127	92			in EWC
Chr 6	13096040	A	G	SNV	0	1	0	0	0	1			66	88	98	83	105	83			in EWC
Chr 6	14170581	C	T	SNV	0	0	0	0.495798	0	0			114	99	105	119	98	125			in EWC
Chr 6	14579020	G	A	SNV	0	0	0	0	0	1			69	98	93	121	83	69			in EWC
Chr 6	15413013	C	G	SNV	1	0	0	0	0	0			101	88	121	110	120	110			in EWC
Chr 6	18239245	G	A	SNV	0	0	0	0.445255	0	0			95	111	116	137	121	65			in EWC
Chr 6	19697251	G	C	SNV							0.433735	0							83	104	in EWC
Chr 6	19832406	G	T	SNV							0.60177	0							113	98	in EWC
Chr 6	20128147	T	G	SNV	0.509434	0	0	0	0	0			53	53	75	65	55	89			in EWC
Chr 6	22312272	A	C	SNV							0.582609	0							115	94	in EWC
Chr 6	22621586	T	C	SNV	0	0	0	0	0	0.520833			72	83	91	97	104	96			in EWC
Chr 6	23295472	T	G	SNV	0	0	0	0	0	0.566667			73	90	96	101	73	90			in EWC
Chr 6	25023147	G	A	SNV	0	0	0	1	0	0			107	104	107	114	108	101			in EWC
Chr 6	26488866	A	G	SNV	0	0	0.5	0	0	0			62	70	78	102	74	73			in EWC
Chr 6	28191456	A	T	SNV	0	0	1	0	0	0			96	80	87	98	96	108			in EWC
Chr 6	29305023	C	A	SNV							0.444444	0							81	85	in EWC
Chr 6	29554221	GAGA	G	INDEL	0.0103093	0	0	0	0	0.461538			97	98	99	107	105	91			in EWC
Chr 6	30198608	C	T	SNV	0	0	0.504854	0	0	0			71	79	103	94	79	112			in EWC
Chr 6	30468876	C	T	SNV	1	0	0	0	0	0			76	72	98	59	71	78			in EWC
Chr 6	32394822	G	A	SNV	0	0	0	0	0.516854	0			72	75	74	87	89	102			in EWC
Chr 6	32714083	G	A	SNV	1	0	0	0	0	0.0194175			71	103	109	99	91	103			in EWC
Chr 6	32827926	T	C	SNV	0	0	0	0	0	0.46789			83	99	90	97	90	109			in EWC
Chr 6	33399165	A	G	SNV	1	0	0	0	0	0			96	89	98	113	99	89			in EWC
Chr 6	33605963	C	A	SNV	0	1	1	0	0	1			95	97	83	91	93	95			in EWC
Chr 6	34557467	GGTGAAGTATC	G	INDEL	0	0	1	0	0	0			94	86	81	99	83	101			in EWC
Chr 6	34931371	T	TTTATATA	INDEL	0	0	0	0	1	0			67	76	73	69	70	81			in EWC
Chr 6	35482852	A	G	SNV	0	0	0.535714	0	0	0			90	87	84	90	89	93			in EWC
Chr 6	35550798	A	G	SNV	1	0	0	0	0	0			77	81	77	87	88	78			in EWC
Chr 6	36928804	C	CTTA	INDEL	0	0	0.0113636	0	0.0128205	0.346939			59	77	88	87	78	49			in EWC
Chr 6	37833894	G	A	SNV	0.482353	0	0	0	0	0			85	97	87	96	107	78			in EWC
Chr 6	38675696	TGTGTCTGTGTGTGTATGTATGTATGTCTATGC	T	INDEL	0	0	0	0	0.5	0			102	83	99	124	102	88			in EWC
Chr 6	39640555	C	A	SNV							1	0							123	114	in EWC
Chr 6	40680558	G	T	SNV	0	0	0.533981	0	0	0			75	93	103	116	97	95			in EWC
Chr 6	41733995	TTC	T	Multisite	0	0	0	1	0	0			101	101	116	114	111	82			in EWC
Chr 6	41733997	C	CAAA	Multisite	0	0	0	1	0	0			101	101	116	114	111	82			in EWC
Chr 6	42654392	C	G	SNV	0	0	0	0	0	1			101	74	86	106	90	90			in EWC
Chr 6	46464868	C	A	SNV							0	0.525							100	80	in EWC
Chr 6	46608031	G	A	SNV							1	0							118	88	in EWC
Chr 6	47084549	A	G	SNV	0	0	0	0	1	0			85	92	99	100	107	94			in EWC
Chr 6	48055035	G	C	SNV	0	0	0	0	0	0.505747			98	104	103	116	102	87			in EWC
Chr 6	48713948	G	A	SNV	0	0	0	0	0.463158	0			93	99	106	99	95	87			in EWC
Chr 6	50488505	A	C	SNV							0	0.488095							79	84	in EWC
Chr 6	50764559	TTAC	T	INDEL	0	0	0	0	0.992647	0			113	134	124	137	136	123			in EWC
Chr 6	51294847	G	A	SNV							0	0.589744							84	78	in EWC
Chr 6	53136335	TAAACAGGCTGAGAAAGAAATTAGGG	T	INDEL	0	0	0	0	0.463158	0			93	124	105	113	95	89			in EWC
Chr 6	53392300	G	C	SNV	0	0	0	0	0.423913	0			78	85	111	96	92	85			in EWC
Chr 6	54661472	A	AGAT	INDEL	0	0	0	0.970588	0	0			70	85	72	68	67	105			in EWC
Chr 6	56336565	A	G	SNV	0	0.00980392	0	0	0	1			105	102	122	119	141	108			in EWC
Chr 6	57354702	C	A	SNV	0.0116279	0	0	0.0133333	0	0.988506			86	78	70	75	69	87			in EWC
Chr 6	57988184	A	G	SNV	1	0	0	0	0	0			68	96	71	89	79	97			in EWC
Chr 6	58877232	A	T	SNV	1	0	0	0	0	0			47	58	73	73	72	54			in EWC
Chr 6	59368463	C	T	SNV	0	1	0	0	0	0			59	76	68	76	81	91			in EWC
Chr 6	61646941	G	A	SNV	0	0	0	1	0	0			108	112	100	138	116	86			in EWC
Chr 6	61769688	A	G	SNV	1	0	0	0	0	0.00970874			100	94	98	119	131	103			in EWC
Chr 6	62107626	TAAG	T	INDEL							0	0.459677							89	124	in EWC
Chr 6	62354930	C	A	SNV	0	0	0	0.010989	0.357143	0			66	72	73	91	84	80			in EWC
Chr 6	65242292	G	A	SNV	1	1	1	1	0.551282	1			71	71	79	75	78	105			in EWC
Chr 6	65556640	C	G	SNV	0	0	0.402597	0	0	0			74	84	77	81	81	85			in EWC
Chr 6	66721977	G	T	SNV	0	0.47619	0	0	0	0			79	105	85	87	84	108			in EWC
Chr 6	67398469	T	C	SNV	0.0113636	0	1	0	0.00909091	0			88	100	100	124	110	95			in EWC
Chr 6	67836871	T	C	SNV							0	0.573913							83	115	in EWC
Chr 6	68421988	G	A	SNV	0	0	0	1	0	0			102	101	102	122	72	112			in EWC
Chr 6	69792234	A	G	SNV	0.457447	0	0	0	0	0			94	66	68	96	63	100			in EWC
Chr 6	69928752	T	G	SNV	0	0	0	0.5	0	0.0126582			91	75	80	82	74	79			in EWC
Chr 6	71759873	A	T	SNV	0	0	0.395833	0	0	0			87	101	96	105	87	101			in EWC
Chr 6	72818283	G	A	SNV	0	1	0	0	0	1			75	84	83	74	67	83			in EWC
Chr 6	73629520	AT	A	INDEL							0	0.405405							73	74	in EWC
Chr 6	74901495	T	C	SNV							0	0.540816							117	98	in EWC
Chr 6	77202285	C	G	SNV	0	0	0	0	0.472727	0			97	92	104	97	110	89			in EWC
Chr 6	78501801	C	T	SNV	0	0	0	0.53125	0	0			81	101	108	96	100	102			in EWC
Chr 6	78804977	G	A	SNV							0	0.54321							88	81	in EWC
Chr 6	80568310	TG	T	INDEL	0	1	0	0	0	0			100	107	111	99	110	91			in EWC
Chr 6	81453349	C	G	SNV	0	0	0.0194175	0	0.0114943	0.989362			72	97	103	80	87	94			in EWC
Chr 6	81590943	C	T	SNV	0	1	0	0	0	1			76	81	74	99	94	80			in EWC
Chr 6	81620004	C	T	SNV							0.436893	0.530973							103	113	in EWC
Chr 6	81620714	G	T	SNV	0	0	1	0	0	0			74	89	79	105	102	92			in EWC
Chr 6	82354585	A	G	SNV	1	0	0	0	0	0			86	88	90	95	94	88			in EWC
Chr 6	82483069	G	A	SNV	0	0	1	0	0	0			76	117	99	102	92	109			in EWC
Chr 6	86290279	C	T	SNV	0	0	0	0	0.52	0			77	83	99	65	75	68			in EWC
Chr 6	88698682	T	C	SNV							0.516129	0							93	92	in EWC
Chr 6	90218488	T	C	SNV	0.988235	0	0	0	0	0			85	86	107	101	70	96			in EWC
Chr 6	93873810	A	G	SNV							0.516484	0.0108696							91	92	in EWC
Chr 6	94160936	C	T	SNV	0	0	0	0	1	0			104	115	100	122	107	77			in EWC
Chr 6	96499817	G	T	Multisite	0	0	0	0	0	0.527027			72	97	100	101	96	74			in EWC
Chr 6	96499818	C	T	Multisite	0	0	0	0	0	0.527027			72	98	100	101	96	74			in EWC
Chr 6	97020063	G	A	SNV	0	0	1	0	0	0			99	100	99	112	95	90			in EWC
Chr 6	97467504	T	G	SNV	0	0	0	1	0	0			101	82	96	78	78	91			in EWC
Chr 6	97517652	C	CG	INDEL							0	1							76	90	in EWC
Chr 6	99110948	T	A	SNV	0	0.0126582	0	0	0	0.44898			72	79	88	87	87	98			in EWC
Chr 6	100139309	A	T	SNV	0	1	0	0	0	0.990291			79	99	90	106	113	103			in EWC
Chr 6	101187368	G	A	SNV							0	0.478723							103	94	in EWC
Chr 6	101381469	G	A	SNV	1	0	0	0	0	0			104	113	117	111	111	83			in EWC
Chr 6	101953292	C	T	SNV	0	0.556522	0	0	0	0			87	115	103	108	80	92			in EWC
Chr 6	102275677	G	C	SNV	0	0.418033	0	0	0	1			103	122	129	131	124	125			in EWC
Chr 6	103414930	G	T	SNV	0	0	0	0	0	0.522222			81	79	97	107	59	90			in EWC
Chr 6	104365758	G	A	SNV	0	0	0	0	0	1			83	83	85	89	82	99			in EWC
Chr 6	105253413	A	T	SNV	0	1	1	0	0	1			82	96	96	93	88	78			in EWC
Chr 6	107185311	G	A	SNV	0	0	0	0	0	1			70	84	63	75	66	64			in EWC
Chr 6	108846146	C	T	SNV							0.546218	0							119	88	in EWC
Chr 6	109361471	C	A	SNV	0	0	0	1	0	0			89	70	72	104	83	105			in EWC
Chr 6	109402583	A	C	SNV	1	0	0	0	0	0			79	93	98	87	72	80			in EWC
Chr 6	109681823	G	A	Multisite	1	0	0	0	0	0			112	98	109	149	142	110			in EWC
Chr 6	109681824	A	T	Multisite	1	0	0	0	0	0			112	98	110	150	142	111			in EWC
Chr 6	110247254	C	T	SNV	1	0	0	0	0	0			57	58	61	77	60	73			in EWC
Chr 6	111255711	C	T	SNV	0	0	0	0	0.459184	0			74	91	71	97	98	89			in EWC
Chr 6	111564362	C	T	SNV	0.444444	0	0	0	0	0			90	82	101	112	97	107			in EWC
[truncated: 513 more rows]

## Sheet: WGS of ntES cell lines
Supplemental Data 2. List of somatic and germline mutations
					Valiant allele frequency of joint call by HaplotypeCaller *					Total read depth in the position							Valiant allele frequency
					VAF in WGS _100×	VAF in WGS_40×				Read depth in WGS _100×	Read depth in WGS_40×						VAF in WGS_100×	VAF in WGS_900×merge	VAF in amplicon sequence
#CHROM	POS	REF	ALT	TYPE	ConJ12 (100×)	ntES cell line #1	ntES cell line #2	ntES cell line #9	ntES cell line #10	ConJ12 (100×)	ntES cell line #1	ntES cell line #2	ntES cell line #9	ntES cell line #10	Mutations in the EWC region	Corresponding mosaic mutation	ConJ12 (100×)	ConJ12 (900×)	ntES cell line #1	ntES cell line #2	ntES cell line #9	ntES cell line #10	1
Chr 1	5556769	A	G	SNV	0	0	0	0	0.4	85	33	44	38	25	in EWC
Chr 1	5876251	T	G	SNV	0	0.027027	0.488889	0	0	69	37	45	30	38	in EWC
Chr 1	7371389	G	C	SNV	0	0	0.0243902	0.333333	0	67	30	41	30	24	in EWC
Chr 1	11230921	A	C	SNV	0	0	0	0.473684	0	126	39	31	38	45	in EWC
Chr 1	11382055	G	C	SNV	0.0280374	0	0	0.71875	0	107	35	42	32	39	in EWC	MosJ 74		0.0270701	0.000196968	0.00016801	0.487786	9.5036e-05
Chr 1	11393886	A	C	SNV	0	0	0.568627	0	0	116	34	51	40	44	in EWC
Chr 1	11514775	T	G	SNV	0	0	0	0	0.595745	116	36	51	31	47	in EWC
Chr 1	11601083	A	G	SNV	0	0	0	0	0.5	108	35	38	38	32	in EWC
Chr 1	11662325	G	A	SNV	0	0	0.459459	0	0	82	48	37	39	40	in EWC
Chr 1	11839768	A	C	SNV	0	0	0	0.428571	0	110	45	31	28	30	in EWC
Chr 1	11909891	A	G	SNV	0	0.0238095	0	0.470588	0	105	42	46	34	41	in EWC
Chr 1	12447705	A	C	SNV	0.0119048	0	0	0	0.44186	84	31	40	35	43	in EWC
Chr 1	12642207	C	T	SNV	0	0	0	0	0.454545	94	49	49	39	44	in EWC
Chr 1	14795940	T	G	SNV	0	0	0.634146	0	0	113	33	41	36	36	in EWC
Chr 1	17029176	A	C	SNV	0	0	0	0.52	0	99	36	38	50	46	in EWC
Chr 1	18593094	G	A	SNV	0	0	0	0	0.478261	59	27	34	39	23	in EWC
Chr 1	19049188	A	C	SNV	0	0.475	0	0	0	86	40	28	36	43	in EWC
Chr 1	20285458	A	C	SNV	0	0	0	0	0.590909	89	35	38	28	22	in EWC
Chr 1	20512445	A	G	SNV	0	0	0	0.5	0	58	38	30	30	33	in EWC
Chr 1	20515767	A	T	SNV	0	0	0	0.428571	0	71	54	30	49	32	in EWC
Chr 1	22553237	A	G	SNV	0	0	0	0.512195	0	82	27	44	41	29	in EWC
Chr 1	23660850	A	C	SNV	0	0	0	0	0.363636	86	31	29	39	33	in EWC
Chr 1	24142404	A	G	SNV	0	0.52	0	0	0	99	50	31	34	33	in EWC
Chr 1	24414429	A	C	SNV	0	0	0	0	0.5	100	44	28	42	52	in EWC
Chr 1	25476583	A	G	SNV	0	0	0.555556	0	0	121	34	36	29	33	in EWC
Chr 1	27626144	T	A	SNV	0	0	0	0.461538	0	99	31	27	39	29	in EWC
Chr 1	27754352	T	C	SNV	0	0	0	0.513514	0	111	32	33	37	20	in EWC
Chr 1	28771590	A	T	SNV	0	0	0	0.521739	0	114	32	30	23	25	in EWC
Chr 1	28799291	T	C	SNV	0	0	0	0.37931	0	117	36	25	29	33	in EWC
Chr 1	29149266	T	G	SNV	0	0	0	0.724138	0	95	27	29	29	38	in EWC
Chr 1	29624008	C	T	SNV	0	0	0.44	0	0	111	23	25	37	38	in EWC
Chr 1	29685684	T	C	SNV	0	0	0	0.483871	0	86	29	34	31	40	in EWC
Chr 1	31318504	T	C	SNV	0	0	0	0.5	0	87	32	26	34	38	in EWC
Chr 1	31651918	T	A	SNV	0	0	0.5	0	0	74	35	32	23	36	in EWC
Chr 1	31902944	T	C	SNV	0	0.0357143	0	0	0.583333	104	28	35	34	24	in EWC
Chr 1	32744976	C	T	SNV	0	0	0	0.444444	0	115	36	29	36	32	in EWC
Chr 1	33189203	T	G	SNV	0	0	0.475	0	0	118	47	40	35	48	in EWC
Chr 1	35054641	A	C	SNV	0	0	0	0.333333	0	81	32	45	39	38	in EWC
Chr 1	35304384	C	T	SNV	0	0	0	0.531915	0	92	33	37	47	39	in EWC
Chr 1	35305539	A	C	SNV	0	0	0	0.534884	0	92	42	43	43	45	in EWC
Chr 1	38144327	C	T	SNV	0	0	0	0.0217391	0.489796	107	43	40	46	49	in EWC
Chr 1	41881617	T	C	SNV	0	0	0	0	0.529412	90	30	31	31	34	in EWC
Chr 1	41999781	T	C	SNV	0	0	0	0	0.571429	92	26	36	31	28	in EWC
Chr 1	44582785	A	G	SNV	0	0	0	0.631579	0	90	45	38	38	31	in EWC
Chr 1	45066409	C	A	SNV	0	0.53125	0	0	0	106	32	39	28	35	in EWC
Chr 1	45496518	A	G	SNV	0.008	0	0	0	0.571429	125	36	45	42	42	in EWC
Chr 1	45508445	T	G	SNV	0	0	0	0.488889	0	95	34	28	45	34	in EWC
Chr 1	47232609	A	G	SNV	0	0	0	0.536585	0	100	43	25	41	38	in EWC
Chr 1	47507000	A	C	SNV	0	0	0.361111	0	0.0263158	72	19	36	35	38	in EWC
Chr 1	48130461	C	T	SNV	0	0	0	0	0.529412	91	28	35	41	34	in EWC
Chr 1	49308219	T	A	SNV	0	0	0	0	0.540541	118	31	30	23	37	in EWC
Chr 1	50224335	A	C	SNV	0	0	0	0	0.486486	102	31	32	37	37	in EWC
Chr 1	50678922	G	C	SNV	0	0	0	0	0.407407	100	27	34	28	27	in EWC
Chr 1	53634488	T	G	SNV	0	0	0.394737	0.02	0	109	50	38	50	33	in EWC
Chr 1	54910722	A	G	SNV	0	0	0.527778	0	0	115	29	36	32	40	in EWC
Chr 1	56165424	A	G	SNV	0	0	0	0.483871	0	76	25	31	31	35	in EWC
Chr 1	56353245	T	G	SNV	0	0	0.628571	0	0	100	25	35	35	36	in EWC
Chr 1	61853041	C	A	SNV	0	0	0	0.677419	0.037037	97	32	28	31	27	in EWC
Chr 1	62398368	C	T	SNV	0	0	0.424242	0	0	99	37	33	27	31	in EWC
Chr 1	63047351	A	C	SNV	0	0	0.54717	0	0	101	51	53	44	62	in EWC
Chr 1	65402465	A	C	SNV	0	0	0	0	0.521739	89	36	39	49	46	in EWC
Chr 1	65905091	T	G	SNV	0	0.470588	0	0	0	81	34	35	42	28	in EWC
Chr 1	66477714	T	A	SNV	0	0	0	0	0.489362	96	27	28	40	47	in EWC
Chr 1	68479347	T	C	SNV	0	0	0.5	0	0	100	35	32	35	38	in EWC
Chr 1	68516034	C	T	SNV	0	0	0	0.631579	0	96	25	25	19	25	in EWC
Chr 1	70694919	G	T	SNV	0	0	0	0	0.422222	108	43	46	43	45	in EWC
Chr 1	73213891	T	C	SNV	0	0.0277778	0	0	0.540541	95	36	42	42	37	in EWC
Chr 1	73460049	A	G	SNV	0	0	0	0.444444	0	88	43	38	45	34	in EWC
Chr 1	74562235	A	T	SNV	0	0	0.489362	0	0	92	53	47	44	52	in EWC
Chr 1	74634210	A	G	SNV	0	0	0.45	0	0	80	33	40	37	39	in EWC
Chr 1	76215594	T	G	SNV	0	0	0	0.34375	0	99	27	30	32	49	in EWC
Chr 1	77377850	A	T	SNV	0	0	0	0.538462	0	73	39	37	39	42	in EWC
Chr 1	77560104	T	C	SNV	0	0	0.366667	0	0	114	27	30	39	37	in EWC
Chr 1	77855330	G	A	SNV	0	0.454545	0	0	0	74	33	30	33	44	in EWC
Chr 1	79395117	A	C	SNV	0	0	0	0.68	0	61	28	37	25	44	in EWC
Chr 1	81272243	G	A	SNV	0	0	0	0	0.378378	94	26	42	28	37	in EWC
Chr 1	82791378	GC	AG	Multisite	0	0	0	0	0.352941	110	27	37	44	34	in EWC
Chr 1	95046273	A	C	SNV	0	0	0	0	0.529412	92	31	26	35	34	in EWC
Chr 1	96428078	T	A	SNV	0	0.551724	0	0	0	79	29	45	35	25	in EWC
Chr 1	96539962	T	A	SNV	0	0.518519	0.0333333	0	0	139	27	30	36	41	in EWC
Chr 1	96709726	T	C	SNV	0	0	0	0.515152	0	85	36	42	33	31	in EWC
Chr 1	97203386	A	C	SNV	0	0.423077	0.037037	0.0285714	0	57	26	27	35	35	in EWC
Chr 1	97538933	A	T	SNV	0	0	0	0	0.611111	80	33	34	41	36	in EWC
Chr 1	97813567	T	G	SNV	0	0.59375	0	0	0	95	32	26	25	31	in EWC
Chr 1	99421766	A	T	SNV	0	0.540541	0	0	0	90	37	24	44	35	in EWC
Chr 1	99656764	T	C	SNV	0	0	0	0.483871	0	88	23	20	31	25	in EWC
Chr 1	99675657	C	T	SNV	0	0	0.65625	0	0	65	27	32	24	29	in EWC
Chr 1	99949535	A	T	SNV	0	0	0	0.413793	0	104	33	31	29	30	in EWC
Chr 1	100647455	T	C	SNV	0	0	0	0.542857	0	120	24	40	35	32	in EWC
Chr 1	100826534	T	A	SNV	0	0	0	0	0.536585	85	34	41	37	41	in EWC
Chr 1	101163069	C	T	SNV	0	0	0	0.585366	0	86	34	33	41	34	in EWC
Chr 1	102447954	T	G	SNV	0	0	0.433333	0	0	109	24	30	33	47	in EWC
Chr 1	102565166	T	G	SNV	0	0	0	0.463415	0.0238095	97	37	32	41	42	in EWC
Chr 1	103174376	A	G	SNV	0	0	0	0	0.388889	90	22	27	29	36	in EWC
Chr 1	103967135	G	A	SNV	0	0	0	0.483871	0	63	31	23	31	36	in EWC
Chr 1	104107597	C	T	SNV	0	0	0	0.571429	0	58	24	31	28	21	in EWC
Chr 1	104624973	T	A	SNV	0	0	0.463415	0	0	110	33	41	27	36	in EWC
Chr 1	107723616	T	A	SNV	0	0.541667	0	0	0	64	24	33	24	24	in EWC
Chr 1	108111868	T	G	SNV	0	0	0.387097	0	0	88	34	31	30	34	in EWC
Chr 1	108493196	A	C	SNV	0	0	0	0.432432	0	98	33	47	37	45	in EWC
Chr 1	108765101	T	G	SNV	0	0.333333	0	0	0	129	18	26	31	31	in EWC
Chr 1	108934946	C	T	SNV	0	0.461538	0	0	0	112	26	37	42	30	in EWC
Chr 1	108955793	T	C	SNV	0	0.428571	0	0	0	75	21	24	22	26	in EWC
Chr 1	109762086	G	A	SNV	0	0.428571	0	0	0	79	35	25	29	26	in EWC
Chr 1	109818302	A	C	SNV	0	0	0.536585	0	0	95	32	41	41	35	in EWC
Chr 1	109926767	C	T	SNV	0	0	0	0	0.425532	111	31	37	33	47	in EWC
Chr 1	110464161	T	G	SNV	0	0	0.459459	0	0	128	30	37	39	40	in EWC
Chr 1	111618156	C	T	SNV	0	0	0	0	0.5	133	43	49	41	42	in EWC
Chr 1	111740490	A	G	SNV	0	0	0	0	0.473684	122	31	33	33	38	in EWC
Chr 1	112427268	T	A	SNV	0	0	0.424242	0	0	103	25	33	30	24	in EWC
Chr 1	113570158	G	T	SNV	0	0	0	0.37931	0	72	33	21	29	34	in EWC
Chr 1	113674883	A	G	SNV	0	0	0	0	0.540541	88	27	35	31	37	in EWC
Chr 1	114784848	A	T	SNV	0	0	0	0	0.690476	63	36	35	33	42	in EWC
Chr 1	114921099	T	C	SNV	0	0	0	0.606061	0	106	30	24	33	36	in EWC
Chr 1	117421595	C	T	SNV	0	0	0	0.545455	0	96	28	38	33	32	in EWC
Chr 1	118023326	A	G	SNV	0	0	0	0	0.6	93	46	39	34	35	in EWC
Chr 1	121527811	A	G	SNV	0	0	0	0.433333	0	99	37	33	30	30	in EWC
Chr 1	122141016	A	C	SNV	0	0	0	0	0.518519	99	27	35	44	27	in EWC
Chr 1	122189083	T	C	SNV	0	0	0	0	0.617647	98	32	30	31	34	in EWC
Chr 1	122348178	T	C	SNV	0	0.351351	0	0	0	69	37	27	33	29	in EWC
Chr 1	122922561	T	G	SNV	0	0	0	0.387097	0	111	28	27	31	36	in EWC
Chr 1	123080706	T	C	SNV	0	0.607143	0	0	0	92	28	33	27	32	in EWC
Chr 1	123226847	C	A	SNV	0	0	0	0	0.5	104	29	30	44	36	in EWC
Chr 1	124392382	T	G	SNV	0	0	0	0	0.488372	115	28	28	25	43	in EWC
Chr 1	127008897	T	G	SNV	0	0	0	0.475	0	110	35	31	40	31	in EWC
Chr 1	129930293	T	G	SNV	0	0.5625	0	0	0	106	32	31	27	27	in EWC
Chr 1	132866269	G	A	SNV	0	0.509434	0.0192308	0.025641	0.0208333	61	53	52	39	48	in EWC
Chr 1	135141698	A	C	SNV	0	0	0	0.521739	0.0227273	99	49	48	46	44	in EWC
Chr 1	135945869	T	C	SNV	0	0.537037	0	0	0	109	54	50	47	36	in EWC
Chr 1	139260868	T	C	SNV	0	0	0	0	0.409091	118	45	46	51	44	in EWC
Chr 1	140061270	A	C	SNV	0	0	0	0.44898	0	117	33	43	49	35	in EWC
Chr 1	141688939	T	A	SNV	0	0.612903	0	0	0	105	31	34	33	40	in EWC
Chr 1	142167576	A	G	SNV	0	0	0	0.432432	0	115	30	38	37	44	in EWC
Chr 1	142280592	A	C	SNV	0	0.392857	0	0	0	126	28	32	36	41	in EWC
Chr 1	142451892	T	C	SNV	0	0	0	0	0.47619	91	30	23	29	42	in EWC
Chr 1	142978599	A	C	SNV	0	0	0	0	0.487179	115	31	29	39	39	in EWC
Chr 1	143489432	T	A	SNV	0	0.589744	0	0	0	76	39	36	41	47	in EWC
Chr 1	145202344	T	C	SNV	0	0.40625	0	0	0	109	32	40	40	44	in EWC
Chr 1	145690218	T	A	SNV	0	0	0	0	0.533333	75	25	36	37	30	in EWC
Chr 1	145726968	T	G	SNV	0	0	0	0	0.451613	94	25	32	19	31	in EWC
Chr 1	146070886	G	T	SNV	0	0	0.512195	0	0	114	30	41	37	31	in EWC
Chr 1	146712829	T	G	SNV	0	0	0	0.666667	0	112	39	27	33	27	in EWC
Chr 1	148660169	T	C	SNV	0	0.542857	0	0	0	110	35	31	32	34	in EWC
Chr 1	153879674	CG	C	INDEL	0	0	0	0	0.545455	110	37	42	32	55	in EWC
Chr 1	155939372	T	G	SNV	0	0	0.473684	0	0	92	34	38	45	45	in EWC
Chr 1	158265189	T	G	SNV	0	0	0.586207	0	0	75	38	29	40	43	in EWC
Chr 1	161222538	C	A	SNV	0	0.425	0	0	0	91	40	44	50	43	in EWC
Chr 1	164975274	A	G	SNV	0	0.565217	0.030303	0.025641	0	101	23	33	39	42	in EWC
Chr 1	167065377	C	A	SNV	0	0	0	0	0.466667	86	44	32	41	45	in EWC
Chr 1	167435375	T	C	SNV	0	0	0	0.45098	0	96	44	49	51	52	in EWC
Chr 1	168716826	T	G	SNV	0	0	0	0.404762	0	79	24	27	42	31	in EWC
Chr 1	168819052	A	G	SNV	0	0	0	0	0.384615	101	30	36	33	26	in EWC
Chr 1	169381320	A	C	SNV	0	0.0263158	0	0.452381	0	92	38	34	42	40	in EWC
Chr 1	169676301	T	G	SNV	0	0.59375	0	0	0	101	32	33	41	45	in EWC
Chr 1	169819266	G	A	SNV	0	0.4	0	0	0	104	40	33	32	41	in EWC
Chr 1	169837394	A	G	SNV	0	0	0	0	0.611111	114	35	39	37	36	in EWC
Chr 1	169838693	C	A	SNV	0	0	0	0.516129	0	101	22	47	31	46	in EWC
Chr 1	169883368	A	G	SNV	0	0.545455	0	0	0	80	44	35	33	37	in EWC
Chr 1	173075502	T	G	SNV	0	0.457143	0	0	0	95	35	34	27	23	in EWC
Chr 1	175956231	T	A	SNV	0	0.542857	0	0	0	96	35	38	32	29	in EWC
Chr 1	176516004	A	C	SNV	0	0	0.565217	0	0	90	26	23	23	37	in EWC
Chr 1	176592059	T	G	SNV	0	0	0.605263	0	0	79	38	38	32	45	in EWC
Chr 1	179953308	T	C	SNV	0.00961538	0.666667	0	0	0.0243902	104	45	36	48	41	in EWC
Chr 1	181566781	C	T	SNV	0.0232558	0.486486	0	0	0	86	37	35	30	34	in EWC
Chr 1	184179592	C	T	SNV	0	0	0	0	0.689655	70	44	35	45	29	in EWC
Chr 1	185524478	G	A	SNV	0	0.425	0	0	0	93	40	46	34	48	in EWC
Chr 1	186454949	T	G	SNV	0	0.0222222	0	0	0.630435	89	45	35	32	46	in EWC
Chr 1	187760305	T	G	SNV	0	0	0	0.485714	0	85	35	23	35	28	in EWC
Chr 1	187859009	T	C	SNV	0	0	0	0.485714	0	96	27	38	35	41	in EWC
Chr 1	187948667	T	C	SNV	0	0.344828	0	0	0	97	29	24	42	38	in EWC
Chr 1	188545852	C	A	SNV	0	0.435897	0	0	0	92	39	41	51	45	in EWC
Chr 1	189253843	T	C	SNV	0	0	0	0.6	0	84	39	50	40	29	in EWC
Chr 1	192295680	T	G	SNV	0	0.6	0	0	0	101	30	37	41	51	in EWC
Chr 1	193688689	C	T	SNV	0	0	0	0	0.55	97	37	41	39	40	in EWC
Chr 1	194138672	A	C	SNV	0	0	0	0	0.547619	108	38	29	33	42	in EWC
Chr 1	194748615	C	T	SNV	0	0	0	0.487805	0	101	37	42	41	25	in EWC
Chr 10	3217171	TTAAGCTCTTTTATTAATGGGACTGCTAC	T	INDEL	0	0	0	0	0.4	102	44	41	40	35	in EWC
Chr 10	9067975	CT	C	INDEL	0	0	0.538462	0	0	80	36	26	32	33	in EWC
Chr 10	10560890	T	G	SNV	0	0	0.52381	0.0243902	0	107	28	42	41	46	in EWC
Chr 10	13626654	T	G	SNV	0	0	0.45098	0	0	129	28	51	43	53	in EWC
Chr 10	13638642	A	C	SNV	0	0.459459	0	0	0	109	37	46	44	39	in EWC
Chr 10	15438712	T	G	SNV	0	0.470588	0	0	0	102	34	47	41	44	in EWC
Chr 10	15916220	A	T	SNV	0	0	0	0	0.468085	93	38	36	41	47	in EWC
Chr 10	16060015	A	G	SNV	0	0	0.566667	0	0	104	24	30	41	49	in EWC
Chr 10	16829667	A	C	SNV	0	0	0	0.40625	0	64	26	27	32	36	in EWC
Chr 10	20877292	A	C	SNV	0	0	0	0	0.465116	93	46	40	38	43	in EWC
Chr 10	22088799	C	A	SNV	0	0	0.333333	0	0	98	48	36	52	55	in EWC
Chr 10	22972861	C	T	SNV	0.0119048	0	0	0	0.583333	84	34	32	36	36	in EWC
Chr 10	23998069	G	T	SNV	0	0	0	0.547619	0	83	34	44	42	54	in EWC
Chr 10	26212642	A	C	SNV	0	0.512821	0	0.0285714	0	94	39	39	35	36	in EWC
Chr 10	27315321	T	G	SNV	0	0.517241	0.0222222	0	0	70	29	45	45	34	in EWC
Chr 10	27830556	T	G	SNV	0	0.0285714	0	0.627907	0	107	35	34	43	42	in EWC
Chr 10	31209670	A	G	SNV	0	0	0	0.518519	0	88	34	32	27	22	in EWC
Chr 10	31398338	A	G	SNV	0	0	0	0	0.459459	104	43	34	37	37	in EWC
Chr 10	32496105	T	C	SNV	0	0	0.5	0	0	100	35	34	37	33	in EWC
Chr 10	33213244	A	T	SNV	0	0.451613	0	0	0	102	31	32	32	36	in EWC
Chr 10	33400638	G	T	SNV	0	0.025641	0	0	0.456522	82	39	40	39	46	in EWC
Chr 10	35192259	A	G	SNV	0	0.45	0	0	0	124	20	31	44	36	in EWC
Chr 10	36374404	T	C	SNV	0	0	0	0.64	0	101	21	31	25	43	in EWC
Chr 10	36798820	A	C	SNV	0	0	0	0	0.516129	110	34	37	46	31	in EWC
Chr 10	37651927	T	C	SNV	0	0	0.344828	0	0	133	25	29	43	42	in EWC
Chr 10	39836794	T	A	SNV	0	0	0.44186	0	0	129	35	43	47	35	in EWC
Chr 10	41117382	T	C	SNV	0	0	0.525	0	0	113	45	40	42	48	in EWC
Chr 10	42576096	A	C	SNV	0	0.531915	0	0	0	89	47	52	46	44	in EWC
Chr 10	47710915	A	C	SNV	0	0	0	0.567568	0	99	25	47	37	31	in EWC
Chr 10	47731952	A	C	SNV	0	0	0	0.45	0	84	34	37	40	38	in EWC
Chr 10	48187504	T	G	SNV	0	0	0	0.594595	0	106	32	21	37	23	in EWC
Chr 10	48401024	A	C	SNV	0	0	0	0.5	0	100	35	31	22	39	in EWC
Chr 10	48666022	T	C	SNV	0	0	0.6	0	0	86	32	25	31	26	in EWC
Chr 10	49068150	C	T	SNV	0	0.448276	0	0	0	62	29	38	30	34	in EWC
Chr 10	49109697	A	T	SNV	0	0.575	0	0	0	126	40	42	29	37	in EWC
Chr 10	49749624	A	G	SNV	0	0	0	0.536585	0	113	34	31	41	39	in EWC
Chr 10	49952079	C	T	SNV	0	0	0	0.619048	0	58	36	29	21	36	in EWC
Chr 10	51647250	A	C	SNV	0	0	0.0277778	0.342105	0	92	31	36	38	31	in EWC
Chr 10	51656597	A	C	SNV	0	0	0.433333	0	0	117	44	30	43	30	in EWC
Chr 10	51931091	A	C	SNV	0	0	0	0.537037	0	104	29	41	54	42	in EWC
Chr 10	54287906	A	C	SNV	0	0	0	0.677419	0	103	27	27	31	34	in EWC
Chr 10	54370258	T	G	SNV	0	0	0	0	0.413793	88	36	30	29	29	in EWC
Chr 10	54794489	T	G	SNV	0	0.37931	0	0	0	98	29	33	32	34	in EWC
Chr 10	55021148	A	G	SNV	0	0	0	0.553191	0	90	36	41	47	34	in EWC
Chr 10	55087089	T	G	SNV	0	0	0.5	0	0	99	35	34	28	33	in EWC
Chr 10	55611810	G	A	SNV	0	0	0.405405	0	0	101	32	37	44	45	in EWC
Chr 10	56400299	T	G	SNV	0	0	0	0	0.418605	112	46	36	44	43	in EWC
Chr 10	57308109	T	G	SNV	0	0	0	0.625	0.0181818	99	38	37	32	55	in EWC
Chr 10	57758927	A	C	SNV	0	0	0.571429	0	0	80	31	35	39	44	in EWC
Chr 10	58783461	A	C	SNV	0	0	0	0.558824	0	97	36	50	34	40	in EWC
Chr 10	58876564	C	T	SNV	0.00884956	0	0	0.465116	0	113	44	42	43	46	in EWC
Chr 10	61841310	A	T	SNV	0	0	0.53125	0	0	72	28	32	28	23	in EWC
Chr 10	64077823	C	T	SNV	0	0	0	0.538462	0	108	25	34	39	37	in EWC
Chr 10	64668888	T	C	SNV	0	0.516129	0	0	0	93	31	28	29	30	in EWC
Chr 10	64677179	A	G	SNV	0	0	0	0.461538	0	111	44	41	26	31	in EWC
Chr 10	68345062	A	T	SNV	0	0.454545	0	0	0	99	44	35	44	40	in EWC
Chr 10	68507298	T	A	SNV	0	0	0	0	0.363636	109	44	47	47	33	in EWC
Chr 10	68596672	T	A	SNV	0	0	0	0.425532	0	101	39	26	47	40	in EWC
Chr 10	68955756	A	C	SNV	0	0	0	0.513514	0	75	45	31	37	29	in EWC
Chr 10	70586728	A	G	SNV	0	0.5	0	0	0	109	42	33	40	40	in EWC
Chr 10	70903715	A	G	SNV	0	0.526316	0	0	0	83	38	46	43	32	in EWC
Chr 10	71509056	T	G	SNV	0	0	0	0.6	0	90	38	29	30	47	in EWC
Chr 10	71603052	G	A	SNV	0.0119048	0.526316	0	0	0	84	38	43	37	30	in EWC	MosJ 128		0.0107317	0.491952	0.00252777	0.00272127	0.00224422
Chr 10	73356607	T	C	SNV	0	0	0.56	0	0	93	37	25	28	53	in EWC
Chr 10	73518216	GT	G	INDEL	0	0	0.583333	0	0	82	28	24	25	27	in EWC
Chr 10	74088578	T	G	SNV	0	0	0	0.515152	0.0227273	79	30	35	33	44	in EWC
Chr 10	74102119	A	C	SNV	0	0	0	0.555556	0	89	34	32	36	33	in EWC
Chr 10	76082116	G	A	SNV	0	0.488372	0	0	0	88	43	59	44	35	in EWC
Chr 10	76183529	A	T	SNV	0	0	0.0196078	0	0.512821	101	38	51	35	39	in EWC
Chr 10	78973567	A	G	SNV	0	0	0.4	0	0	103	48	40	44	51	in EWC
Chr 10	79377381	T	G	SNV	0	0	0.5	0	0	97	33	40	45	46	in EWC
Chr 10	79750876	A	G	SNV	0	0.384615	0	0	0	102	52	43	37	37	in EWC
Chr 10	81282303	A	T	SNV	0	0.465116	0	0	0	124	43	45	39	35	in EWC
Chr 10	81507728	C	CTAAGA	INDEL	0	0	0.418182	0	0	118	44	55	40	38	in EWC
Chr 10	82669290	T	A	SNV	0	0	0.585366	0	0	82	33	41	41	53	in EWC
Chr 10	84244431	T	A	SNV	0	0	0.5	0	0	101	35	36	41	47	in EWC
Chr 10	84297226	C	T	SNV	0.00806452	0.02	0.583333	0	0	124	50	36	32	40	in EWC
Chr 10	85581057	A	C	SNV	0	0.5	0	0	0	87	32	34	36	39	in EWC
Chr 10	87289127	A	G	SNV	0	0.35	0	0	0	117	40	31	23	37	in EWC
Chr 10	88912489	C	A	SNV	0	0	0.594595	0	0	69	37	37	38	27	in EWC
Chr 10	89544768	A	C	SNV	0	0.5	0	0	0	89	44	39	39	36	in EWC
Chr 10	90502844	T	C	SNV	0	0	0.625	0	0	100	32	40	46	32	in EWC
Chr 10	90890407	T	C	SNV	0	0	0	0.473684	0	99	39	34	38	34	in EWC
Chr 10	91410229	C	T	SNV	0	0	0	0	0.428571	110	44	42	38	42	in EWC
Chr 10	91518568	C	T	SNV	0.0138889	0	0.431818	0	0	72	46	44	45	40	in EWC
Chr 10	94195022	T	C	SNV	0	0.0232558	0	0.702128	0	110	43	37	47	50	in EWC
Chr 10	96932299	T	A	SNV	0	0	0.518519	0	0	119	26	27	36	31	in EWC
Chr 10	97391719	C	A	SNV	0	0	0	0.487179	0	114	32	39	39	34	in EWC
Chr 10	99285766	T	A	SNV	0.0136986	0	0.441176	0	0	73	32	34	38	46	in EWC
Chr 10	101350393	A	G	SNV	0	0	0	0	0.433333	116	37	46	29	30	in EWC
Chr 10	101404929	C	A	SNV	0	0	0	0.441176	0	99	32	29	34	23	in EWC
Chr 10	101506311	T	A	SNV	0	0.607143	0	0	0	91	28	30	33	39	in EWC
Chr 10	101781309	G	T	SNV	0.0117647	0	0.48	0	0	85	28	25	50	23	in EWC
Chr 10	102382945	T	G	SNV	0	0	0.65	0	0	106	30	40	38	37	in EWC
Chr 10	102619910	A	G	SNV	0	0	0	0.55	0	121	42	25	40	40	in EWC
Chr 10	102623774	A	C	SNV	0	0	0	0.34375	0	104	27	35	32	46	in EWC
Chr 10	103785380	T	G	SNV	0	0	0.612903	0	0	120	27	31	36	35	in EWC
Chr 10	104125956	T	G	SNV	0	0.363636	0	0	0	108	33	23	30	36	in EWC
Chr 10	104301612	T	G	SNV	0	0	0	0.461538	0	89	24	24	26	31	in EWC
Chr 10	104741754	C	T	SNV	0	0	0	0.677419	0	89	22	34	31	30	in EWC
Chr 10	106759945	A	G	SNV	0.00862069	0	0	0.617647	0	116	26	44	34	43	in EWC
Chr 10	107539573	A	C	SNV	0	0	0	0	0.372093	115	35	48	30	43	in EWC
Chr 10	109222354	T	C	SNV	0	0	0	0	0.378378	110	27	38	30	37	in EWC
Chr 10	109431459	G	A	SNV	0	0	0	0.344828	0	99	34	31	29	27	in EWC
Chr 10	109439480	A	C	SNV	0	0.04	0	0.583333	0	111	25	46	36	39	in EWC
Chr 10	110708184	C	T	SNV	0	0	0.631579	0	0	66	45	38	54	38	in EWC
Chr 10	111270635	A	C	SNV	0	0.529412	0	0	0	89	34	39	46	50	in EWC
Chr 10	112369905	T	G	SNV	0	0	0	0.617021	0.0227273	98	36	33	47	44	in EWC
Chr 10	112477649	A	C	SNV	0	0	0	0.526316	0	131	25	40	38	46	in EWC
Chr 10	112964845	T	A	SNV	0	0.457143	0	0	0	92	35	29	45	38	in EWC
Chr 10	113106805	G	A	SNV	0	0	0	0.612903	0	67	22	32	31	31	in EWC
Chr 10	113471478	T	C	SNV	0	0	0.714286	0	0	99	26	35	41	34	in EWC
Chr 10	114028982	G	T	SNV	0	0	0	0	0.5	76	17	31	36	24	in EWC
Chr 10	114797963	T	G	SNV	0	0	0	0	0.375	92	45	29	35	48	in EWC
Chr 10	114946231	A	C	SNV	0	0	0	0.535714	0.047619	67	24	23	28	21	in EWC
Chr 10	116812285	C	T	SNV	0.0138889	0.487179	0	0	0	72	39	52	45	47	in EWC
Chr 10	118010039	CTG	CTTT	Multisite	0	0	0.5	0	0	111	45	60	47	47	in EWC
Chr 10	120968221	A	C	SNV	0	0	0	0.454545	0	61	33	28	33	39	in EWC
Chr 10	122180196	T	G	SNV	0	0.34375	0	0	0	86	32	35	30	32	in EWC
Chr 10	122818375	G	A	SNV	0	0	0	0.609756	0	66	31	42	41	40	in EWC
Chr 10	123395176	A	C	SNV	0	0	0	0.53125	0.0222222	102	35	22	32	45	in EWC
Chr 10	123835725	T	G	SNV	0	0	0	0	0.461538	97	36	42	42	39	in EWC
Chr 10	124835248	A	C	SNV	0	0	0	0.407407	0	126	36	29	27	41	in EWC
Chr 10	126135811	A	G	SNV	0	0	0.36	0	0	101	33	25	43	39	in EWC
Chr 10	126712284	T	A	SNV	0	0	0.465116	0	0	66	58	43	49	46	in EWC
Chr 10	129481838	T	A	SNV	0	0.432432	0	0	0	88	37	30	38	34	in EWC
Chr 10	129724863	T	A	SNV	0	0	0.589744	0	0	104	22	39	33	43	in EWC
Chr 10	129729296	T	C	SNV	0	0	0.59375	0	0	121	43	32	30	43	in EWC
Chr 11	6127574	A	G	SNV	0	0	0.490909	0	0	98	43	55	52	53	in EWC
Chr 11	8462496	C	G	SNV	0	0	0.357143	0	0	89	41	28	46	44	in EWC
Chr 11	9992808	C	A	SNV	0	0	0	0.375	0	85	39	35	40	49	in EWC
Chr 11	10730336	C	T	SNV	0	0	0.512821	0	0	91	24	39	42	34	in EWC
Chr 11	11217829	T	C	SNV	0	0	0	0.472222	0	81	33	28	36	38	in EWC
Chr 11	11515007	CT	C	INDEL	0	0	0	0.482759	0	90	36	35	29	41	in EWC
Chr 11	12922799	G	A	SNV	0	0.666667	0	0	0	109	36	40	32	35	in EWC
Chr 11	13220849	C	G	SNV	0	0	0	0.448276	0	75	31	27	29	32	in EWC
Chr 11	13225576	A	T	SNV	0	0.34375	0	0	0	83	32	31	42	48	in EWC
Chr 11	13758835	G	A	SNV	0.152174	0.423077	0.354839	0	0	92	26	31	41	46	in EWC	MosJ 20	0.152174	0.0724638	0.499438	0.49058	0.00168748	0.00336889
Chr 11	14975593	T	G	SNV	0	0.62069	0	0	0	72	29	29	27	34	in EWC
Chr 11	15353849	G	A	SNV	0	0.0333333	0.0344828	0.0277778	0.454545	123	30	29	36	33	in EWC
Chr 11	18018539	A	T	SNV	0.010101	0	0.475	0	0	99	25	40	34	33	in EWC
Chr 11	19701542	C	T	SNV	0	0	0	0.52	0	85	44	45	50	50	in EWC
Chr 11	20086807	T	G	SNV	0	0.47619	0	0	0	85	42	49	46	48	in EWC
Chr 11	20278402	A	G	SNV	0	0	0	0	0.408451	66	63	50	53	71	in EWC
Chr 11	20397917	G	A	SNV	0	0	0	0.418605	0	94	40	45	43	40	in EWC
Chr 11	20710729	CCATCCCCTTTTCCTTAGA	C	INDEL	0	0.454545	0	0	0	114	44	46	40	41	in EWC
Chr 11	20967871	T	G	SNV	0	0.548387	0	0	0.0222222	93	31	49	35	45	in EWC
Chr 11	23514302	C	T	SNV	0	0	0.5	0	0	115	33	30	33	38	in EWC
Chr 11	25038316	A	G	SNV	0	0	0.461538	0	0	94	32	39	30	35	in EWC
Chr 11	26789036	T	G	SNV	0	0	0	0	0.578947	109	41	33	32	38	in EWC
Chr 11	27271370	G	A	SNV	0	0	0	0.475	0	80	21	43	40	30	in EWC
Chr 11	30018070	T	A	SNV	0	0.583333	0	0	0	92	48	41	39	48	in EWC
Chr 11	30577752	T	G	SNV	0	0	0	0.02	0.404762	97	43	40	50	42	in EWC
Chr 11	32361686	C	T	SNV	0	0.555556	0	0	0	96	36	46	51	29	in EWC
Chr 11	35073558	A	C	SNV	0	0.458333	0	0	0	88	48	38	36	42	in EWC
Chr 11	36374330	T	C	SNV	0	0	0	0.615385	0	92	52	42	39	41	in EWC
Chr 11	36427080	A	T	SNV	0	0.566667	0	0	0	73	30	31	33	35	in EWC
Chr 11	36726271	T	C	SNV	0	0	0	0.342105	0	106	46	20	38	41	in EWC
Chr 11	37511175	C	T	SNV	0	0	0	0.347826	0	105	32	20	23	28	in EWC
Chr 11	38658350	AC	A	INDEL	0	0	0	0	0.571429	86	22	23	31	28	in EWC
Chr 11	39268182	A	C	SNV	0	0	0	0.47619	0.03125	110	28	32	21	32	in EWC
Chr 11	39657365	G	A	SNV	0	0	0	0	0.645161	97	26	29	35	31	in EWC
Chr 11	39902694	T	C	SNV	0	0.592593	0	0	0	82	27	26	35	31	in EWC
Chr 11	40114533	T	G	SNV	0	0	0	0	0.52381	113	30	35	35	42	in EWC
Chr 11	40559274	A	G	SNV	0	0	0	0.558824	0	113	36	43	34	41	in EWC
Chr 11	41467433	T	C	SNV	0	0	0.548387	0	0	120	43	31	33	33	in EWC
Chr 11	42446533	A	C	SNV	0	0	0	0.459459	0	120	27	26	37	40	in EWC
Chr 11	42456015	T	C	SNV	0	0.441176	0	0	0	118	34	31	41	37	in EWC
Chr 11	42789954	T	C	SNV	0	0	0	0	0.56	90	30	30	39	25	in EWC
Chr 11	44243187	T	G	SNV	0	0	0	0	0.533333	74	34	36	38	30	in EWC
Chr 11	45011313	G	A	SNV	0	0.518519	0	0	0	91	27	42	41	28	in EWC
Chr 11	45328229	CT	C	INDEL	0	0	0	0.37931	0	105	34	25	29	24	in EWC
Chr 11	45541452	C	T	SNV	0	0	0	0.354839	0	90	56	53	31	42	in EWC
Chr 11	46084086	A	G	SNV	0	0.595238	0	0	0	104	42	39	48	28	in EWC
Chr 11	47143842	T	C	SNV	0	0	0	0	0.55814	104	37	35	44	43	in EWC
Chr 11	47300338	A	G	Multisite #1	0	0.37931	0	0	0	113	29	42	36	45	in EWC
Chr 11	47300359	G	C	Multisite #1	0	0.411765	0	0	0	111	34	38	37	42	in EWC
Chr 11	47324132	T	C	SNV	0	0.354839	0	0	0	123	31	35	42	33	in EWC
Chr 11	48051970	A	C	SNV	0	0	0	0.44	0	70	40	30	25	41	in EWC
Chr 11	48732403	G	A	SNV	0	0	0	0.636364	0	84	41	59	44	49	in EWC
Chr 11	49743343	A	T	SNV	0	0.604651	0	0	0	77	43	50	42	45	in EWC
Chr 11	50495046	T	C	SNV	0.0116279	0	0.519231	0	0	86	54	52	58	43	in EWC
Chr 11	51400978	G	A	SNV	0	0	0	0.52381	0	100	47	53	42	45	in EWC
Chr 11	51500095	C	A	SNV	0	0	0.03125	0	0.454545	80	35	32	43	33	in EWC
Chr 11	56793761	C	T	SNV	0	0	0	0.531915	0	70	30	40	47	36	in EWC
Chr 11	56983038	T	A	SNV	0	0	0	0.692308	0	86	40	34	39	32	in EWC
Chr 11	58480922	T	C	SNV	0	0	0	0	0.473684	74	28	37	33	38	in EWC
Chr 11	60804008	A	T	SNV	0	0.433962	0	0	0	65	53	46	54	43	in EWC
Chr 11	61279777	C	T	SNV	0	0	0.48	0	0	102	39	50	59	61	in EWC
Chr 11	61293518	A	C	SNV	0	0.488372	0	0	0	120	43	53	45	40	in EWC
Chr 11	64282234	A	T	SNV	0	0	0	0.543478	0	102	35	35	46	40	in EWC
Chr 11	65104446	A	G	SNV	0	0	0.547619	0	0	96	31	42	50	27	in EWC
Chr 11	65199835	G	A	SNV	0	0	0	0.025	0.55	109	42	31	40	20	in EWC
Chr 11	66133542	A	C	SNV	0	0.025	0	0.441176	0	72	40	34	34	38	in EWC
Chr 11	66364688	T	G	SNV	0	0	0	0.522727	0	73	43	37	44	46	in EWC
Chr 11	66739107	T	G	SNV	0	0	0	0	0.606061	60	46	38	43	33	in EWC
Chr 11	66832360	A	G	SNV	0	0	0	0.384615	0	102	30	50	39	43	in EWC
Chr 11	70286978	A	G	SNV	0	0.583333	0	0	0	68	24	39	33	40	in EWC
Chr 11	70563750	A	G	SNV	0	0	0	0	0.428571	59	26	45	42	42	in EWC
Chr 11	71221442	A	G	SNV	0	0	0.384615	0	0	101	39	26	42	55	in EWC
Chr 11	71468081	T	G	SNV	0	0.5	0	0	0	66	42	43	32	40	in EWC
Chr 11	74016569	A	C	SNV	0	0.0333333	0.030303	0.03125	0.515152	62	30	33	32	33	in EWC
Chr 11	74578235	G	T	SNV	0	0.0212766	0	0.485714	0	66	47	41	35	47	in EWC
Chr 11	76389725	T	A	SNV	0	0.477273	0	0	0	60	44	42	39	34	in EWC
Chr 11	76778713	A	C	SNV	0	0.47619	0.0212766	0	0	78	42	47	35	42	in EWC
Chr 11	77382039	T	G	SNV	0	0	0	0	0.511628	101	41	49	53	43	in EWC
Chr 11	77958151	A	C	SNV	0	0.515152	0	0	0	76	33	46	36	37	in EWC
Chr 11	78489010	A	C	SNV	0	0.534884	0	0	0	69	43	57	42	52	in EWC
Chr 11	79225025	G	T	SNV	0	0	0.565217	0	0	78	42	46	44	42	in EWC
Chr 11	79826290	A	T	SNV	0	0	0	0.545455	0	86	50	37	33	51	in EWC
Chr 11	80247882	A	C	SNV	0	0.375	0	0	0	90	40	42	56	50	in EWC
Chr 11	80692404	C	T	SNV	0	0	0	0	0.428571	122	50	37	44	42	in EWC
Chr 11	81102723	A	C	SNV	0	0.0192308	0	0	0.465116	94	52	37	41	43	in EWC
Chr 11	81187847	A	C	SNV	0	0.542857	0	0	0	90	35	36	32	50	in EWC
Chr 11	81400648	A	C	SNV	0	0	0	0.5625	0	96	42	44	48	38	in EWC
Chr 11	81776228	A	C	SNV	0	0.487805	0	0	0	100	41	30	30	39	in EWC
Chr 11	81896601	C	A	SNV	0	0	0	0	0.533333	84	37	40	37	30	in EWC
Chr 11	83237405	C	T	SNV	0	0.5	0	0	0	103	38	44	51	48	in EWC
Chr 11	86698294	T	A	SNV	0	0	0	0.466667	0	112	52	39	60	55	in EWC
Chr 11	87923122	C	CA	INDEL	0	0	0	0.44186	0	79	37	53	43	45	in EWC
Chr 11	89580041	T	G	SNV	0	0	0	0.431818	0	95	51	38	44	50	in EWC
Chr 11	91776545	A	G	SNV	0	0	0	0.515152	0	89	29	26	33	26	in EWC
Chr 11	91931565	C	T	SNV	0	0	0.548387	0	0	115	20	31	34	36	in EWC
Chr 11	92653243	T	A	SNV	0	0	0	0.5625	0	88	27	33	32	40	in EWC
Chr 11	93134719	A	C	SNV	0	0.410256	0	0	0	94	39	26	35	31	in EWC
Chr 11	94894465	G	A	SNV	0	0	0	0	0.585714	126	44	49	62	70	in EWC
Chr 11	95024223	A	G	SNV	0	0.5	0	0	0	87	38	30	31	48	in EWC
Chr 11	95282059	A	G	SNV	0.011236	0.425532	0	0	0	89	47	72	64	56	in EWC
Chr 11	96326777	TAG	TC	Multisite	0	0	0.468085	0	0	47	43	47	46	28	in EWC
Chr 11	96985222	A	G	SNV	0	0.71875	0	0	0	76	32	55	53	45	in EWC
Chr 11	99024357	A	T	SNV	0	0	0.411765	0	0	81	45	51	50	54	in EWC
Chr 11	100118618	T	C	SNV	0	0.5	0	0	0	95	42	37	44	47	in EWC
Chr 11	100151572	A	C	SNV	0	0.431373	0	0	0	94	51	58	54	41	in EWC
Chr 11	102306775	A	G	SNV	0	0	0	0.529412	0	85	36	48	34	56	in EWC
Chr 11	103025199	A	C	SNV	0	0.487805	0	0	0	70	41	40	35	40	in EWC
Chr 11	103586025	T	A	SNV	0	0.407407	0	0	0	91	54	56	56	58	in EWC
Chr 11	104029902	A	C	SNV	0	0.538462	0	0	0	86	52	39	36	40	in EWC
Chr 11	105102571	T	A	SNV	0	0.458333	0	0	0	87	48	43	36	42	in EWC
Chr 11	105276310	T	C	SNV	0	0.486486	0	0	0	104	37	45	55	55	in EWC
Chr 11	105808774	A	C	SNV	0	0.522727	0	0	0	95	44	36	38	46	in EWC
Chr 11	106385717	GA	G	INDEL	0	0	0.34	0	0	98	50	50	49	47	in EWC
Chr 11	107708447	T	G	SNV	0	0.621622	0	0	0	93	37	32	47	41	in EWC
Chr 11	108706763	T	C	SNV	0	0	0	0.5	0	96	39	43	30	34	in EWC
Chr 11	112363139	A	C	SNV	0	0	0	0.390244	0	93	31	39	41	21	in EWC
Chr 11	112473733	T	A	SNV	0	0	0	0	0.52381	97	33	41	44	42	in EWC
Chr 11	114795345	C	T	SNV	0	0	0	0.428571	0	76	37	39	42	39	in EWC
Chr 11	115159842	T	G	SNV	0	0.52381	0	0	0	95	42	48	47	50	in EWC
Chr 11	116116394	A	G	SNV	0	0.0208333	0	0	0.52	76	48	40	35	50	in EWC
Chr 11	117052469	A	G	SNV	0	0	0	0	0.645161	52	43	37	36	31	in EWC
Chr 11	118169977	T	G	SNV	0	0.574468	0	0.0181818	0	98	47	52	55	56	in EWC
Chr 11	118789688	C	T	SNV	0.11236	0	0	0.5	0	89	49	44	42	43	in EWC	MosJ 23	0.111111	0.0994764	0.000360101	0.00120882	0.493523	0.0010773
Chr 11	118977459	A	T	SNV	0	0.526316	0	0	0	69	38	40	45	36	in EWC
Chr 11	119338758	A	T	SNV	0	0	0.539683	0	0	96	35	63	49	36	in EWC
Chr 11	120344918	AGCAG	ACTGC	Multisite	0	0	0	0	0.509434	112	49	61	43	53	in EWC
Chr 11	121051952	A	T	SNV	0	0.522727	0	0	0	93	44	63	51	50	in EWC
Chr 12	3323949	T	C	SNV	0	0	0.630435	0	0	83	51	46	39	43	in EWC
Chr 12	4001231	T	G	SNV	0	0	0.511628	0	0	92	49	43	48	51	in EWC
Chr 12	6327512	C	CT	INDEL	0	0	0	0.538462	0	82	33	32	39	37	in EWC
Chr 12	6441405	A	C	SNV	0	0.0344828	0	0.533333	0	108	29	27	30	36	in EWC
Chr 12	6939904	A	C	SNV	0	0	0	0.517241	0	117	24	26	29	33	in EWC
Chr 12	8208906	A	C	SNV	0	0	0	0.538462	0	96	43	34	39	41	in EWC
Chr 12	9880120	T	A	SNV	0	0	0.458333	0	0	90	23	24	31	31	in EWC
Chr 12	10645171	T	G	SNV	0	0	0	0.424242	0	101	41	38	33	43	in EWC
Chr 12	10724420	T	G	SNV	0	0	0.368421	0	0	95	37	38	31	36	in EWC
Chr 12	10764585	A	G	SNV	0	0	0	0	0.487179	108	31	40	33	39	in EWC
Chr 12	11442125	A	T	SNV	0	0.428571	0	0	0	130	28	35	47	43	in EWC
Chr 12	12669750	G	A	SNV	0	0	0	0.463415	0	102	37	39	41	38	in EWC
Chr 12	13871306	C	T	SNV	0	0	0	0.422222	0	87	39	47	45	39	in EWC
Chr 12	14097004	A	G	SNV	0	0.652174	0	0	0	120	23	26	28	39	in EWC
Chr 12	14124967	A	G	SNV	0	0.621622	0	0	0	95	37	30	40	30	in EWC
Chr 12	14160416	A	T	SNV	0	0	0.578947	0	0	85	34	38	46	39	in EWC
Chr 12	14279929	A	G	SNV	0	0	0	0.527778	0	108	36	29	36	45	in EWC
Chr 12	14363094	T	G	SNV	0	0	0	0	0.333333	105	38	27	43	24	in EWC
Chr 12	14645021	T	A	SNV	0	0.518519	0	0	0	113	27	33	29	44	in EWC
Chr 12	14645605	T	A	SNV	0	0	0.37931	0	0	118	33	29	40	35	in EWC
Chr 12	15217267	T	G	SNV	0	0	0.62069	0	0	94	34	29	42	34	in EWC
Chr 12	15548294	T	C	SNV	0	0	0	0.527778	0	119	49	40	36	35	in EWC
Chr 12	15841684	A	C	SNV	0	0.586207	0	0	0	74	29	34	40	31	in EWC
Chr 12	19928706	A	C	SNV	0	0.71875	0	0	0	95	32	52	42	44	in EWC
Chr 12	20660161	G	A	SNV	0	0.452381	0	0	0	87	42	49	35	49	in EWC
Chr 12	20769856	T	G	SNV	0	0	0.545455	0	0	115	47	44	42	62	in EWC
Chr 12	25120794	C	T	SNV	0	0	0	0.452381	0	88	44	45	42	54	in EWC
Chr 12	25234221	T	C	SNV	0	0.536585	0	0	0	91	41	27	45	52	in EWC
Chr 12	27487730	A	G	SNV	0	0.5	0	0	0	79	30	37	36	50	in EWC
Chr 12	28284020	A	C	SNV	0	0.530612	0	0	0	106	49	32	35	35	in EWC
Chr 12	29254352	T	C	SNV	0	0	0.636364	0	0	103	44	44	32	29	in EWC
Chr 12	29257045	T	C	SNV	0	0	0	0.45	0	84	48	38	40	49	in EWC
Chr 12	29927480	A	C	SNV	0	0.5	0	0	0	77	38	37	34	32	in EWC
Chr 12	31253679	T	G	SNV	0	0	0.571429	0	0	110	43	42	41	56	in EWC
Chr 12	32204184	T	C	SNV	0	0	0.384615	0	0	81	47	39	36	46	in EWC
Chr 12	32553070	T	A	SNV	0	0	0.487179	0	0	90	30	39	44	50	in EWC
Chr 12	34649297	T	G	SNV	0	0	0	0.428571	0	107	32	42	35	30	in EWC
Chr 12	34947580	G	A	SNV	0	0	0.540541	0	0	66	30	37	36	25	in EWC
Chr 12	36095252	GTTTC	GTTA	Multisite	0	0	0.413043	0	0	135	40	46	46	45	in EWC
Chr 12	38508671	A	C	SNV	0	0	0	0.333333	0	85	38	28	27	29	in EWC
Chr 12	39106293	T	C	SNV	0	0	0.472222	0	0	107	26	36	27	40	in EWC
Chr 12	39557266	T	G	SNV	0	0	0	0.5	0	94	34	48	40	41	in EWC
Chr 12	40362187	T	G	SNV	0	0	0.479167	0	0	109	40	48	53	46	in EWC
Chr 12	41692066	C	A	SNV	0.0125	0	0	0.465116	0	80	45	41	43	39	in EWC
Chr 12	42891785	T	A	SNV	0	0	0	0.586207	0	100	32	29	29	41	in EWC
Chr 12	43221125	T	A	SNV	0	0	0	0.518519	0	99	26	33	27	37	in EWC
Chr 12	43462569	A	T	SNV	0	0.454545	0	0	0	102	33	38	31	23	in EWC
Chr 12	43773957	A	G	SNV	0	0	0	0.5	0	94	32	44	38	31	in EWC
Chr 12	43803437	A	G	SNV	0	0	0	0.48	0	100	27	35	25	48	in EWC
Chr 12	43940676	A	C	SNV	0	0.571429	0.037037	0	0	108	28	27	36	30	in EWC
Chr 12	44052671	T	G	SNV	0	0	0	0.366667	0	120	31	31	30	23	in EWC
Chr 12	44821454	A	C	SNV	0	0	0	0	0.566667	97	26	37	21	30	in EWC
Chr 12	45713556	A	G	SNV	0	0.548387	0	0	0	72	31	38	29	34	in EWC
Chr 12	46270150	C	A	SNV	0	0	0	0	0.551724	83	35	38	38	29	in EWC
Chr 12	46739469	A	G	SNV	0	0	0	0.5	0	117	22	28	30	29	in EWC
Chr 12	47140105	A	T	SNV	0	0	0	0	0.518519	85	32	32	38	27	in EWC
Chr 12	47503300	A	T	SNV	0	0.551724	0	0	0	73	29	35	34	26	in EWC
Chr 12	47595759	T	G	SNV	0	0	0	0.581395	0	107	34	37	43	43	in EWC
Chr 12	48140095	G	T	SNV	0	0	0.454545	0	0	110	31	22	24	39	in EWC
Chr 12	48468961	T	G	SNV	0	0.567568	0	0	0	68	37	35	40	29	in EWC
Chr 12	48679976	C	T	SNV	0.0285714	0	0	0.392857	0	70	25	30	28	25	in EWC
Chr 12	49047062	A	C	SNV	0	0.481481	0	0.0294118	0	82	27	37	34	36	in EWC
Chr 12	50316326	A	C	SNV	0	0	0	0.608696	0	92	24	23	46	28	in EWC
Chr 12	50474222	T	A	SNV	0	0	0	0.475	0	96	43	39	40	41	in EWC
Chr 12	51143636	T	G	SNV	0	0	0.567568	0	0	76	46	37	32	40	in EWC
Chr 12	53114250	A	C	SNV	0	0	0	0.456522	0	85	31	40	46	47	in EWC
Chr 12	53593446	C	G	SNV	0	0	0	0.463415	0	87	31	41	41	43	in EWC
Chr 12	54016525	A	C	SNV	0	0.428571	0	0	0	97	42	34	49	39	in EWC
Chr 12	58018905	T	A	SNV	0	0	0.611111	0	0	98	25	36	32	42	in EWC
Chr 12	58550363	A	C	SNV	0	0	0	0.594595	0	83	32	40	37	34	in EWC
Chr 12	59582403	A	C	SNV	0	0	0.03125	0.461538	0	107	30	32	39	33	in EWC
Chr 12	60697735	T	G	SNV	0	0	0	0	0.594595	125	24	31	35	37	in EWC
Chr 12	60827924	A	C	SNV	0	0	0	0.575758	0	96	28	34	33	28	in EWC
Chr 12	61214634	A	T	SNV	0	0	0	0	0.518519	63	36	23	26	27	in EWC
Chr 12	61228833	A	G	SNV	0	0.432432	0	0	0	101	37	38	32	23	in EWC
Chr 12	61244075	T	A	SNV	0	0	0.653846	0	0	97	36	26	43	26	in EWC
Chr 12	61382396	C	T	SNV	0	0	0.0285714	0	0.6	75	31	35	20	25	in EWC
Chr 12	61783560	C	A	SNV	0	0	0	0	0.4	78	35	28	39	35	in EWC
Chr 12	62211693	A	C	SNV	0	0.363636	0	0	0	97	33	41	42	37	in EWC
Chr 12	62615799	A	G	SNV	0	0	0.384615	0	0	110	27	26	41	40	in EWC
Chr 12	62709223	C	T	SNV	0.00900901	0	0	0.4375	0	111	24	48	32	33	in EWC
Chr 12	63126542	C	A	SNV	0	0.615385	0	0	0	84	26	35	42	44	in EWC
Chr 12	64011889	A	C	SNV	0	0	0	0.472222	0	91	31	37	36	52	in EWC
Chr 12	64161739	T	C	SNV	0	0	0	0	0.571429	105	43	40	25	35	in EWC
Chr 12	64303563	C	T	SNV	0	0.413793	0	0	0	113	29	34	30	27	in EWC
Chr 12	65705240	A	C	SNV	0	0	0	0.625	0	101	33	34	32	42	in EWC
Chr 12	67218855	G	A	SNV	0	0.483871	0	0	0	91	31	32	30	32	in EWC
Chr 12	67267962	T	C	SNV	0	0	0.571429	0	0	80	28	35	42	39	in EWC
Chr 12	68601019	A	C	SNV	0	0	0	0	0.432432	92	42	33	34	37	in EWC
Chr 12	69041188	G	T	SNV	0	0	0	0	0.394737	80	40	53	34	38	in EWC
Chr 12	69100916	A	C	SNV	0	0.03125	0	0	0.432432	61	32	45	37	37	in EWC
Chr 12	71154099	T	A	SNV	0	0	0.413043	0	0	84	33	46	35	30	in EWC
Chr 12	71403800	G	A	SNV	0	0.434783	0	0	0	100	46	37	47	42	in EWC
Chr 12	71616191	A	C	SNV	0	0.55	0	0	0	101	40	38	48	46	in EWC
Chr 12	73576400	T	G	SNV	0	0.628571	0	0	0	52	35	41	34	36	in EWC
Chr 12	74042249	T	G	SNV	0	0	0.516129	0	0	81	35	31	34	44	in EWC
Chr 12	75488972	A	C	SNV	0	0.555556	0	0	0	104	36	34	39	46	in EWC
Chr 12	76398274	T	A	SNV	0	0.375	0	0	0	104	40	42	57	52	in EWC
Chr 12	76876670	T	C	SNV	0	0	0.40625	0	0.0285714	106	38	32	35	35	in EWC
Chr 12	77585147	T	G	SNV	0	0	0	0.583333	0	88	49	51	48	41	in EWC
Chr 12	78116491	A	G	SNV	0	0.45	0	0	0	101	40	44	51	42	in EWC
Chr 12	79091487	T	G	SNV	0	0.4	0	0	0	93	35	40	48	57	in EWC
Chr 12	80953574	A	C	SNV	0	0.52459	0	0	0	104	61	36	38	50	in EWC
Chr 12	83244386	A	C	SNV	0	0	0	0.621622	0	92	34	31	37	35	in EWC
Chr 12	85135203	T	C	SNV	0	0.382353	0	0	0	69	34	47	39	44	in EWC
Chr 12	85782260	T	G	SNV	0	0	0.52381	0	0	98	46	42	49	43	in EWC
Chr 12	89861113	G	C	SNV	0	0	0.428571	0	0	137	30	28	36	35	in EWC
Chr 12	89970970	A	G	SNV	0	0	0	0.52381	0	100	31	31	42	31	in EWC
Chr 12	90504890	T	G	SNV	0	0	0.628571	0	0	80	27	35	30	35	in EWC
Chr 12	91438838	T	C	SNV	0	0	0	0.5	0	107	44	28	36	44	in EWC
Chr 12	91655211	A	C	SNV	0	0.475	0	0	0	88	40	38	46	37	in EWC
Chr 12	91945063	T	G	SNV	0	0.515152	0	0	0	95	33	39	46	51	in EWC
Chr 12	92352266	T	C	SNV	0	0	0	0.5625	0	96	29	40	32	32	in EWC
Chr 12	92698420	C	A	SNV	0	0	0	0	0.465116	112	28	27	30	43	in EWC
Chr 12	93248758	T	G	SNV	0	0	0	0.592593	0	89	26	21	27	37	in EWC
Chr 12	93582444	A	C	SNV	0	0	0	0.434783	0	77	22	24	23	27	in EWC
Chr 12	94840612	C	T	SNV	0	0	0.594595	0	0	85	42	37	34	35	in EWC
Chr 12	98878193	T	C	SNV	0	0.595745	0	0	0	55	47	54	41	47	in EWC
Chr 12	99165602	T	A	SNV	0	0.543478	0	0	0	114	46	49	45	48	in EWC
Chr 12	100450382	T	C	SNV	0	0	0	0.676471	0	84	41	41	34	39	in EWC
Chr 12	101546284	G	C	SNV	0	0	0	0.48	0	89	35	31	25	45	in EWC
Chr 12	101780469	T	G	SNV	0	0	0	0.444444	0	73	42	39	36	28	in EWC
Chr 12	102109291	C	T	SNV	0	0.486486	0	0	0	108	37	46	47	44	in EWC
Chr 12	103684479	T	C	SNV	0	0.444444	0	0	0	110	45	39	36	36	in EWC
Chr 12	104047260	A	C	SNV	0	0.0434783	0	0	0.511628	94	46	43	31	43	in EWC
Chr 12	104128031	G	A	SNV	0	0	0	0	0.411765	104	41	59	44	51	in EWC
Chr 12	105053567	A	T	SNV	0	0.428571	0.0952381	0.0217391	0.0731707	61	35	42	46	41	in EWC
Chr 12	107367303	A	G	SNV	0	0	0	0.56	0	97	43	24	25	36	in EWC
Chr 12	107536178	T	C	SNV	0	0.541667	0	0	0	70	24	33	29	47	in EWC
Chr 12	107609289	G	A	SNV	0	0.5	0	0	0	65	34	38	33	30	in EWC
Chr 12	107865665	T	C	SNV	0	0	0	0.5	0	76	52	36	44	30	in EWC
Chr 12	109239435	T	C	SNV	0	0	0	0.5	0	88	35	44	42	43	in EWC
Chr 12	112614932	G	GT	INDEL	0	0	0	0.407407	0	108	38	47	27	33	in EWC
Chr 12	113996027	T	C	SNV	0.00854701	0	0	0.607143	0	117	40	45	28	47	in EWC
Chr 12	116499302	T	C	SNV	0	0.705882	0	0	0	93	34	48	47	37	in EWC
Chr 12	116821662	A	T	SNV	0	0	0	0.466667	0	102	28	39	30	40	in EWC
Chr 12	116999976	T	A	SNV	0	0	0.387097	0	0	124	45	31	37	42	in EWC
Chr 12	117427546	T	C	SNV	0	0.513514	0	0	0	53	37	39	34	33	in EWC
Chr 12	118462105	A	C	SNV	0	0.6	0	0	0	98	25	37	33	45	in EWC
Chr 12	118914212	T	G	SNV	0	0.027027	0.4	0	0	62	37	30	34	41	in EWC
Chr 12	119869742	T	C	SNV	0	0	0.552632	0	0	82	27	38	32	35	in EWC
Chr 13	3804142	T	G	SNV	0	0.576923	0	0	0	94	26	44	43	50	in EWC
Chr 13	4247855	A	G	SNV	0	0	0.594595	0	0.025	144	39	37	27	40	in EWC
Chr 13	5113443	AATAATAACAAAATGACTC	A	INDEL	0	0.4	0	0	0	99	30	34	43	38	in EWC
Chr 13	8203733	C	G	SNV	0	0	0.565217	0	0	64	30	23	21	35	in EWC
Chr 13	9843606	C	T	SNV	0.178082	0	0	0.434783	0	73	34	41	46	40	in EWC	MosJ 25	0.178082	0.130601	0	0.000534474	0.52217	0.000689022
Chr 13	12170496	T	C	SNV	0	0.630435	0	0	0	72	46	36	48	53	in EWC
Chr 13	12388928	G	A	SNV	0	0	0	0	0.512821	103	36	47	32	39	in EWC
Chr 13	13235337	A	G	SNV	0	0	0	0.482759	0	118	42	34	58	38	in EWC
Chr 13	16105749	T	G	SNV	0	0	0	0.5	0	86	32	31	46	43	in EWC
Chr 13	16548243	T	C	SNV	0	0.333333	0	0	0	62	30	43	45	33	in EWC
Chr 13	17581104	T	G	SNV	0	0	0.47619	0	0	90	28	42	44	60	in EWC
Chr 13	18248858	T	A	SNV	0	0	0.487805	0	0	101	30	41	36	35	in EWC
Chr 13	19079235	A	C	SNV	0	0.466667	0	0	0	85	30	29	38	35	in EWC
Chr 13	19629497	G	A	SNV	0	0.5	0	0	0	93	38	36	28	47	in EWC
Chr 13	21235033	T	A	SNV	0	0	0	0.510638	0	106	38	49	47	42	in EWC
Chr 13	22304426	T	A	SNV	0	0	0	0	0.428571	86	46	49	39	42	in EWC
Chr 13	22347374	T	A	SNV	0	0	0	0	0.542857	107	35	35	52	35	in EWC
Chr 13	23432416	C	T	SNV	0	0	0.0222222	0	0.44898	105	42	45	45	49	in EWC
Chr 13	26808224	T	TG	INDEL	0	0.526316	0	0	0	92	19	42	36	40	in EWC
Chr 13	29603439	A	C	SNV	0	0.666667	0.0232558	0	0	107	30	43	48	48	in EWC
Chr 13	30228853	A	G	SNV	0	0	0	0	0.514286	99	38	37	35	35	in EWC
Chr 13	31081813	C	T	SNV	0	0	0	0.428571	0	97	33	27	35	29	in EWC
Chr 13	31569937	G	A	SNV	0	0	0.513514	0	0	87	42	37	37	42	in EWC
Chr 13	31753974	A	G	SNV	0	0	0	0.697674	0	91	38	41	43	41	in EWC
Chr 13	33614411	A	C	SNV	0	0	0	0.588235	0	76	40	23	34	28	in EWC
Chr 13	34045886	A	G	SNV	0	0	0	0	0.482143	92	36	48	41	56	in EWC
Chr 13	34253745	T	A	SNV	0	0.377778	0	0	0	63	45	38	49	57	in EWC
Chr 13	35087795	G	A	SNV	0	0	0	0	0.472222	84	39	36	49	36	in EWC
Chr 13	35442310	T	C	SNV	0	0.6	0	0	0	97	35	45	31	44	in EWC
Chr 13	36656631	A	T	SNV	0	0.37931	0	0	0	74	29	36	35	40	in EWC
Chr 13	38623002	G	A	SNV	0	0	0.333333	0	0	96	34	33	43	41	in EWC
Chr 13	39442657	AG	A	INDEL	0	0	0.432432	0	0	84	36	37	34	37	in EWC
Chr 13	39444124	GCCACAGATTCGTC	G	INDEL	0	0	0.37037	0	0	94	39	27	47	38	in EWC
Chr 13	40117301	C	T	SNV	0	0.515152	0	0	0	108	33	37	36	36	in EWC
Chr 13	41601495	G	A	SNV	0.326531	0	0	0.40625	0	98	40	36	32	45	in EWC	MosJ 27	0.333333	0.31533	0	0.00120337	0.509186	0
Chr 13	43752601	T	G	SNV	0	0.54902	0	0	0	83	51	41	47	52	in EWC
Chr 13	44045582	T	C	SNV	0	0	0	0	0.478261	78	43	34	44	46	in EWC
Chr 13	46210893	C	T	SNV	0	0	0	0	0.45	79	31	37	33	40	in EWC
Chr 13	46601402	T	G	SNV	0	0	0.411765	0	0	83	45	51	39	59	in EWC
Chr 13	46636870	T	C	SNV	0	0.470588	0.0238095	0	0	92	34	42	41	37	in EWC
Chr 13	48355910	T	G	SNV	0	0.0277778	0	0	0.545455	70	36	33	35	44	in EWC
Chr 13	48774887	A	C	SNV	0	0	0	0	0.509091	112	47	55	45	55	in EWC
Chr 13	49909111	A	C	SNV	0	0	0	0.466667	0	99	40	45	30	34	in EWC
Chr 13	50237761	T	G	SNV	0	0	0	0	0.470588	107	45	37	40	51	in EWC
Chr 13	52744135	G	A	SNV	0.0727273	0	0	0	0.487179	110	33	30	34	39	in EWC	MosJ 28	0.0789474	0.137304	0.000737735	0.00173886	0.00107773	0.501031
Chr 13	54567744	T	C	SNV	0	0.565217	0	0	0	113	46	46	52	51	in EWC
Chr 13	55357371	C	A	SNV	0	0	0	0.6	0	68	46	51	50	57	in EWC
Chr 13	56447633	C	T	SNV	0	0	0	0.404762	0	79	38	34	42	42	in EWC
Chr 13	58542425	C	T	SNV	0	0.5	0	0	0	89	42	35	28	46	in EWC
Chr 13	61576151	G	T	SNV	0	0.472222	0	0	0	84	36	29	41	39	in EWC
Chr 13	62849192	G	A	SNV	0	0	0	0	0.571429	104	58	41	43	49	in EWC
Chr 13	62920126	T	A	SNV	0	0.533333	0	0	0	105	30	40	44	38	in EWC
Chr 13	63545795	T	G	SNV	0	0	0	0.536585	0	85	52	50	41	38	in EWC
Chr 13	64955541	A	C	SNV	0	0	0	0.5	0	96	46	42	34	44	in EWC
Chr 13	67851646	A	C	SNV	0	0	0	0.485714	0	105	33	48	35	62	in EWC
Chr 13	68773866	A	G	SNV	0	0.571429	0	0	0	108	42	54	30	38	in EWC
Chr 13	69115189	C	T	SNV	0	0	0	0	0.485714	90	31	39	46	35	in EWC
Chr 13	70277450	T	G	SNV	0	0.0212766	0	0	0.388889	78	47	51	32	36	in EWC
Chr 13	71171613	T	C	SNV	0	0	0.604651	0	0	92	25	43	35	26	in EWC
Chr 13	71775449	C	A	SNV	0	0	0.6	0	0	122	26	40	30	38	in EWC
Chr 13	72010292	A	G	SNV	0	0	0	0	0.534884	82	35	37	32	43	in EWC
Chr 13	72353955	A	G	SNV	0	0	0	0.428571	0	71	28	34	42	31	in EWC
Chr 13	72354625	A	G	SNV	0	0.518519	0	0	0	80	27	21	21	31	in EWC
Chr 13	72729916	G	A	SNV	0	0.615385	0	0	0	100	39	30	62	37	in EWC
Chr 13	72877437	A	C	SNV	0	0	0	0.439024	0	88	43	41	41	44	in EWC
Chr 13	73241430	A	C	SNV	0	0.625	0	0	0	139	40	31	37	46	in EWC
Chr 13	75793645	G	A	SNV	0	0	0	0	0.5	93	41	44	30	46	in EWC
Chr 13	75919364	T	C	SNV	0	0.512821	0	0	0	74	39	56	46	48	in EWC
Chr 13	76032281	T	A	SNV	0	0	0	0	0.575	90	47	50	42	40	in EWC
Chr 13	76341844	T	C	SNV	0	0.6	0	0	0	78	25	35	35	39	in EWC
Chr 13	76759175	C	T	SNV	0	0	0	0.487805	0	77	32	41	41	33	in EWC
Chr 13	77176786	T	G	SNV	0	0	0.451613	0	0	108	36	31	35	34	in EWC
Chr 13	78483764	AAC	A	INDEL	0	0	0.514286	0	0	81	28	35	27	47	in EWC
Chr 13	78769576	A	C	SNV	0	0	0	0.538462	0.0294118	118	35	40	39	34	in EWC
Chr 13	78987870	A	G	SNV	0	0.52	0	0	0	81	25	30	33	26	in EWC
Chr 13	82003147	A	T	SNV	0	0	0	0.7	0	128	36	42	30	38	in EWC
Chr 13	82278375	T	G	SNV	0	0	0	0.473684	0	98	39	42	38	34	in EWC
Chr 13	84103548	A	C	SNV	0	0.516129	0	0	0	87	31	35	46	40	in EWC
Chr 13	84214351	C	T	SNV	0	0.444444	0	0.03125	0	104	36	44	32	43	in EWC
Chr 13	86206622	A	C	SNV	0	0	0	0.470588	0	82	37	46	51	44	in EWC
Chr 13	86469281	A	C	SNV	0	0	0	0	0.5	86	40	42	43	48	in EWC
Chr 13	86904950	T	A	SNV	0	0	0	0	0.565217	86	26	42	40	46	in EWC
Chr 13	87668284	C	T	SNV	0	0	0.5	0	0	109	23	34	27	26	in EWC
Chr 13	88149388	A	G	SNV	0	0	0	0	0.482759	97	24	34	35	29	in EWC
Chr 13	89551992	G	A	SNV	0	0	0	0.575758	0	123	43	39	33	53	in EWC
Chr 13	90593280	G	T	SNV	0	0	0	0.418605	0	114	34	43	43	46	in EWC
Chr 13	94401908	T	A	SNV	0	0.560976	0	0	0	129	41	39	39	42	in EWC
Chr 13	94478595	C	T	SNV	0	0	0	0	0.565217	102	44	40	36	46	in EWC
Chr 13	94807110	T	C	SNV	0	0.571429	0	0	0	88	56	46	46	47	in EWC
Chr 13	95137583	T	G	SNV	0	0.457143	0	0	0	86	35	39	49	51	in EWC
Chr 13	95527956	T	C	SNV	0	0.607143	0	0	0	101	28	45	34	40	in EWC
Chr 13	96458730	C	T	SNV	0	0	0.475	0	0	84	37	40	43	50	in EWC
Chr 13	98935754	T	G	SNV	0	0.518519	0	0	0	90	54	45	49	62	in EWC
Chr 13	99319442	G	A	SNV	0	0.543478	0	0	0	118	46	50	35	63	in EWC
Chr 13	100535265	T	C	SNV	0	0.710526	0	0	0	107	38	48	63	46	in EWC
Chr 13	101625884	G	A	SNV	0	0	0	0.421053	0	81	35	36	38	32	in EWC
Chr 13	105832412	A	C	SNV	0	0	0	0.451613	0	82	29	29	31	25	in EWC
Chr 13	105875517	T	C	SNV	0	0	0	0	0.413043	123	35	48	29	46	in EWC
Chr 13	105983388	T	A	SNV	0	0	0.444444	0	0	100	37	27	34	46	in EWC
Chr 13	106439567	A	G	SNV	0	0.5	0	0	0	105	34	40	29	36	in EWC
Chr 13	107940301	T	A	SNV	0	0.5	0	0	0	80	30	42	40	31	in EWC
Chr 13	107950784	T	C	SNV	0	0	0	0.574468	0	61	37	41	47	38	in EWC
Chr 13	110198234	A	C	SNV	0	0.0434783	0	0.594595	0.0408163	72	23	27	37	49	in EWC
Chr 13	110199552	G	A	SNV	0	0	0	0.589744	0	102	32	39	39	37	in EWC
Chr 13	112129765	G	A	SNV	0.00826446	0	0	0	0.564103	121	44	45	55	39	in EWC
Chr 13	114791235	A	G	SNV	0	0	0	0	0.46	101	43	51	50	50	in EWC
Chr 13	118411285	T	C	SNV	0.00943396	0	0	0	0.404762	106	33	36	45	42	in EWC
Chr 14	5892594	A	C	SNV	0	0.0333333	0.34375	0	0	108	30	32	41	50	in EWC
Chr 14	8638875	T	C	SNV	0	0.534884	0	0	0	109	43	49	46	51	in EWC
Chr 14	8822762	T	A	SNV	0	0	0.354839	0	0	99	42	31	33	48	in EWC
Chr 14	9019289	T	G	SNV	0	0	0.0285714	0	0.473684	99	41	35	29	38	in EWC
Chr 14	10357397	T	C	SNV	0	0.576923	0	0	0	97	26	20	38	34	in EWC
Chr 14	12815255	G	A	SNV	0	0	0	0.428571	0	57	30	37	35	34	in EWC
Chr 14	13145204	T	A	SNV	0	0.487179	0	0	0	97	39	38	41	39	in EWC
Chr 14	13289991	A	C	SNV	0.0117647	0	0	0.575758	0	85	28	26	33	27	in EWC
Chr 14	14734080	T	C	SNV	0	0	0	0.456522	0	94	55	35	46	43	in EWC
Chr 14	15045331	T	G	SNV	0	0	0.0212766	0	0.386364	77	32	47	42	44	in EWC
Chr 14	15843634	T	C	SNV	0	0	0.59375	0.0384615	0	72	25	32	26	45	in EWC
Chr 14	15974026	A	G	SNV	0	0	0.414634	0	0	86	33	41	46	42	in EWC
Chr 14	16802125	T	C	SNV	0	0	0	0.512821	0	76	31	31	39	44	in EWC
Chr 14	18871034	G	C	SNV	0	0.5	0	0	0	99	46	39	44	46	in EWC
Chr 14	19156323	T	G	SNV	0	0	0	0	0.571429	90	24	31	37	35	in EWC
Chr 14	19300958	G	A	SNV	0	0.432432	0	0	0	104	37	26	36	36	in EWC
Chr 14	23682828	C	T	SNV	0	0.527778	0	0	0	111	36	31	44	38	in EWC
Chr 14	23997357	T	G	SNV	0.0138889	0	0	0	0.491228	72	39	39	35	57	in EWC
Chr 14	24299998	T	G	SNV	0	0	0.382979	0	0	95	40	47	46	43	in EWC
Chr 14	24625887	A	T	SNV	0	0.522727	0	0	0	88	44	46	51	46	in EWC
Chr 14	26386551	C	T	SNV	0	0.409091	0	0	0	108	44	43	32	36	in EWC
Chr 14	28324584	G	T	SNV	0	0	0	0	0.560976	102	48	28	31	41	in EWC
Chr 14	28746156	A	C	SNV	0	0	0.567568	0	0	95	38	37	30	47	in EWC
Chr 14	29308213	A	C	SNV	0	0	0	0.416667	0	93	33	48	24	39	in EWC
Chr 14	31563668	T	C	SNV	0	0.560976	0	0	0	124	41	48	35	39	in EWC
Chr 14	31819941	T	C	SNV	0	0.413043	0	0	0	108	46	33	36	42	in EWC
Chr 14	32168449	CTCAGAAGTT	C	INDEL	0	0.4375	0	0	0	110	48	43	39	59	in EWC
Chr 14	32415591	T	A	SNV	0	0	0	0	0.5	128	44	45	46	44	in EWC
Chr 14	34538256	T	A	SNV	0	0.439024	0	0	0	89	41	43	47	50	in EWC
Chr 14	34664567	A	T	SNV	0	0	0.658537	0	0	79	38	41	35	50	in EWC
Chr 14	35238673	T	C	SNV	0	0	0.419355	0	0	95	24	31	42	46	in EWC
Chr 14	35260052	T	G	SNV	0	0	0	0	0.411765	80	32	35	33	34	in EWC
Chr 14	37586573	T	G	SNV	0	0	0	0.53125	0	102	33	24	32	45	in EWC
Chr 14	37990526	T	C	SNV	0	0	0.619048	0	0	109	32	42	30	29	in EWC
Chr 14	38802071	A	G	SNV	0	0	0.466667	0	0	119	31	30	25	28	in EWC
Chr 14	39407632	A	C	SNV	0	0.424242	0	0	0	112	33	32	27	30	in EWC
Chr 14	40242958	T	A	SNV	0	0	0	0.472222	0	105	32	34	36	35	in EWC
Chr 14	44175086	T	C	SNV	0	0	0	0	0.361111	107	42	37	28	36	in EWC
Chr 14	48552556	C	T	SNV	0	0	0	0	0.571429	97	33	45	45	42	in EWC
Chr 14	49451192	T	C	SNV	0	0.585366	0	0	0	118	41	46	46	42	in EWC
Chr 14	49889931	A	C	SNV	0	0	0	0	0.483871	115	45	58	44	31	in EWC
Chr 14	50120507	A	C	SNV	0	0.522727	0	0	0	57	44	35	40	48	in EWC
Chr 14	50577567	T	G	SNV	0	0	0	0.581395	0	81	38	28	43	25	in EWC
Chr 14	51373827	A	G	SNV	0	0	0.375	0	0	88	34	40	38	39	in EWC
Chr 14	52359904	C	T	SNV	0	0	0.571429	0	0.0285714	86	43	28	43	35	in EWC
Chr 14	55967358	C	T	SNV	0	0.486486	0	0	0	83	37	48	38	38	in EWC
Chr 14	58135135	A	T	SNV	0	0	0	0.384615	0	103	38	45	39	39	in EWC
Chr 14	58532310	A	C	SNV	0	0	0.512821	0	0	87	41	39	33	41	in EWC
Chr 14	60571699	T	G	SNV	0	0	0	0.527778	0	87	40	42	36	48	in EWC
Chr 14	63252403	G	T	SNV	0	0	0	0.555556	0	87	35	42	27	39	in EWC
Chr 14	63529694	C	A	SNV	0	0	0	0	0.531915	84	34	39	40	47	in EWC
Chr 14	63626916	A	C	SNV	0	0	0	0	0.369565	95	53	31	46	46	in EWC
Chr 14	63634713	A	T	SNV	0	0	0.432432	0	0	93	42	37	33	39	in EWC
Chr 14	67514631	G	A	SNV	0	0	0	0	0.382979	71	32	38	45	47	in EWC
Chr 14	78260602	G	A	SNV	0	0	0	0	0.585366	84	50	57	47	41	in EWC
Chr 14	80050000	C	A	SNV	0	0.037037	0	0	0.487805	91	27	44	32	41	in EWC
Chr 14	81783083	C	T	SNV	0	0	0	0.5	0	89	32	30	24	33	in EWC
Chr 14	81976359	T	C	SNV	0	0	0	0.409091	0	72	24	22	22	26	in EWC
Chr 14	82098583	C	T	SNV	0	0	0	0.571429	0	93	30	29	28	42	in EWC
Chr 14	83083863	C	T	SNV	0	0	0	0.566667	0	103	32	21	30	30	in EWC
Chr 14	83426308	A	G	SNV	0	0	0.564103	0	0	93	24	39	49	40	in EWC
Chr 14	83451279	G	T	SNV	0	0	0	0.483871	0	92	30	26	31	35	in EWC
Chr 14	84178076	G	T	SNV	0	0	0	0.675	0	100	20	29	40	26	in EWC
Chr 14	85121880	A	G	SNV	0	0	0.525	0	0	108	30	40	36	46	in EWC
Chr 14	86300900	T	A	SNV	0	0	0.555556	0	0	90	39	36	36	40	in EWC
Chr 14	87944857	T	G	SNV	0	0	0	0.375	0	100	32	22	40	30	in EWC
Chr 14	88096930	A	G	SNV	0	0	0	0	0.512195	96	27	38	31	41	in EWC
Chr 14	88304810	A	G	SNV	0	0	0.551724	0	0	108	32	29	28	34	in EWC
Chr 14	88494562	A	G	SNV	0	0	0.52	0	0	109	25	25	20	24	in EWC
Chr 14	88748754	T	A	SNV	0	0	0	0.515152	0	139	35	32	33	39	in EWC
Chr 14	88764244	C	T	SNV	0	0	0	0.391304	0	118	28	46	23	33	in EWC
Chr 14	89592470	AGCCTCAGTTGGAGAG	A	INDEL	0	0.5625	0	0	0	112	32	33	47	33	in EWC
Chr 14	91879976	T	A	SNV	0	0.612903	0	0	0	77	31	30	30	32	in EWC
Chr 14	92729292	C	T	SNV	0	0	0	0.486486	0	98	31	33	37	35	in EWC
Chr 14	92755405	C	A	SNV	0	0	0	0	0.454545	62	25	26	25	22	in EWC
Chr 14	93169742	A	C	SNV	0	0	0	0.571429	0	106	34	34	42	39	in EWC
Chr 14	93425876	G	A	SNV	0	0	0	0.333333	0	138	20	30	27	33	in EWC
Chr 14	93879377	C	T	SNV	0	0	0.40625	0	0	105	36	32	28	34	in EWC
Chr 14	95843909	T	C	SNV	0	0.451613	0	0	0	117	31	30	34	30	in EWC
Chr 14	96648133	T	A	SNV	0	0.53125	0	0	0	99	32	31	35	30	in EWC
Chr 14	96805436	G	A	SNV	0.11236	0.454545	0.375	0	0	89	22	24	22	33	in EWC	MosJ 30	0.11236	0.061008	0.507387	0.492537	0.000536049	0.000892857
Chr 14	96944514	G	A	SNV	0	0	0.542857	0	0	106	37	35	28	26	in EWC
Chr 14	97259481	T	A	SNV	0.00826446	0.473684	0	0	0	121	38	23	39	31	in EWC
Chr 14	97345410	T	C	SNV	0	0	0	0	0.586207	85	26	28	39	29	in EWC
Chr 14	97938441	G	A	SNV	0	0	0	0.53125	0	96	18	41	32	32	in EWC
Chr 14	98848917	G	T	SNV	0.00757576	0	0.0222222	0	0.642857	132	34	45	50	56	in EWC
Chr 14	100430264	T	A	SNV	0	0	0	0	0.552632	95	50	34	50	38	in EWC
Chr 14	100503819	G	A	SNV	0	0.461538	0	0	0	115	39	34	34	42	in EWC
Chr 14	102139376	A	C	SNV	0	0	0.525	0	0	117	36	40	44	34	in EWC
Chr 14	102763386	A	C	SNV	0	0	0.53125	0	0	83	20	32	38	32	in EWC
Chr 14	103998783	T	C	SNV	0	0	0	0	0.709677	120	46	50	37	31	in EWC
Chr 14	104402793	G	T	SNV	0	0	0	0	0.560976	112	30	33	43	41	in EWC
Chr 14	104847717	T	G	SNV	0	0	0.459459	0	0	109	36	37	45	40	in EWC
Chr 14	104972894	C	T	SNV	0	0	0	0	0.511628	91	29	30	42	43	in EWC
Chr 14	105789988	A	T	SNV	0	0	0	0	0.465116	95	34	51	34	43	in EWC
Chr 14	106654241	T	C	SNV	0	0.441176	0	0	0	96	34	32	23	36	in EWC
Chr 14	106775219	T	A	SNV	0	0	0	0	0.470588	67	30	33	45	34	in EWC
Chr 14	106786607	T	A	SNV	0	0	0.658537	0	0	100	25	41	29	30	in EWC
Chr 14	106881265	C	T	SNV	0	0	0.548387	0	0	91	39	31	28	34	in EWC
Chr 14	107379877	A	G	SNV	0	0	0	0	0.538462	92	32	41	36	39	in EWC
Chr 14	107971434	C	T	Multisite #2	0	0.451613	0	0	0	118	31	44	31	21	in EWC
Chr 14	107971451	G	T	Multisite #2	0	0.516129	0	0	0	116	31	43	32	20	in EWC
Chr 14	108094025	A	G	SNV	0.00813008	0.590909	0	0	0	123	22	25	33	42	in EWC
Chr 14	108337506	ATATGATTCTC	A	INDEL	0	0	0	0	0.521739	112	31	22	36	23	in EWC
Chr 14	108472587	G	A	SNV	0	0	0	0	0.5	76	32	29	19	22	in EWC
Chr 14	108829861	T	G	SNV	0	0	0	0.594595	0	74	28	23	37	36	in EWC
Chr 14	110053067	T	G	SNV	0	0	0	0	0.521739	97	21	28	25	23	in EWC
Chr 14	110705697	G	A	SNV	0	0	0	0	0.4	93	26	33	25	30	in EWC
Chr 14	111087396	T	A	SNV	0	0.357143	0	0	0	73	28	35	30	39	in EWC
Chr 14	111729655	T	G	SNV	0	0	0	0	0.488372	116	28	28	28	43	in EWC
Chr 14	112546234	A	C	SNV	0	0.375	0	0	0	108	24	36	23	33	in EWC
Chr 14	112883675	T	G	SNV	0	0.447368	0	0	0	128	38	42	29	26	in EWC
Chr 14	113042443	T	C	SNV	0	0	0	0.512821	0	109	37	30	39	39	in EWC
Chr 14	113153957	G	T	SNV	0	0	0	0	0.571429	126	32	28	27	35	in EWC
Chr 14	113320382	C	G	SNV	0	0	0.617647	0	0	102	23	34	19	35	in EWC
Chr 14	114032644	C	T	SNV	0	0	0	0	0.422222	102	34	31	33	45	in EWC
Chr 14	114859304	G	A	SNV	0	0	0	0.564103	0	83	40	35	39	37	in EWC
Chr 14	116949592	T	C	SNV	0	0	0	0.361111	0	119	39	33	36	33	in EWC
Chr 14	117002102	C	T	SNV	0.0105263	0	0	0	0.666667	95	27	26	27	39	in EWC
Chr 14	119352986	G	A	SNV	0	0	0	0.541667	0	96	37	57	48	42	in EWC
Chr 14	119896265	T	A	SNV	0	0	0	0	0.472222	86	30	49	39	36	in EWC
Chr 14	124064859	A	G	SNV	0	0	0	0.4	0	86	41	33	45	52	in EWC
Chr 15	3714791	A	C	SNV	0	0.487179	0	0	0	108	39	37	40	45	in EWC
Chr 15	5059208	T	G	SNV	0	0.444444	0	0	0	118	36	38	40	31	in EWC
Chr 15	5136662	A	C	SNV	0	0.487805	0	0	0	95	41	43	48	52	in EWC
Chr 15	8053599	A	G	SNV	0	0.444444	0	0	0	83	45	51	35	58	in EWC
Chr 15	9007428	G	A	SNV	0	0	0	0.611111	0	88	38	37	36	36	in EWC
Chr 15	10698414	G	GGGGCT	INDEL	0	0	0.5	0	0	96	30	34	57	47	in EWC
Chr 15	11341561	A	C	SNV	0	0	0	0.487179	0	67	44	26	39	34	in EWC
Chr 15	12614960	T	G	SNV	0	0.478261	0	0	0	86	46	42	47	41	in EWC
Chr 15	17038102	A	G	SNV	0	0.628571	0	0	0	114	35	25	36	51	in EWC
Chr 15	18925203	C	G	SNV	0	0	0	0	0.611111	94	34	32	29	36	in EWC
Chr 15	19434798	T	G	SNV	0	0	0	0.0294118	0.514286	117	27	38	34	35	in EWC
Chr 15	20788573	T	G	SNV	0	0	0.708333	0	0	115	29	24	22	36	in EWC
Chr 15	21907874	A	C	SNV	0	0	0	0.560976	0	101	32	32	41	47	in EWC
Chr 15	22520828	A	T	SNV	0	0	0	0	0.5	91	31	43	34	32	in EWC
Chr 15	22730279	G	A	SNV	0	0.529412	0	0	0	117	34	34	32	40	in EWC
Chr 15	22756822	C	A	SNV	0	0.0344828	0.558824	0	0	106	29	34	34	42	in EWC
Chr 15	22830749	A	T	SNV	0	0.558824	0	0	0	135	34	25	45	41	in EWC
Chr 15	23447956	A	T	SNV	0	0	0	0	0.5	77	28	33	39	26	in EWC
Chr 15	24120160	C	G	SNV	0	0	0	0	0.645161	101	33	38	30	31	in EWC
Chr 15	24557275	T	C	SNV	0	0.44	0	0	0	90	25	28	34	41	in EWC
Chr 15	25665601	T	C	SNV	0	0.555556	0	0	0	72	27	36	41	36	in EWC
Chr 15	26063319	T	G	SNV	0	0	0	0	0.514286	95	37	34	31	35	in EWC
Chr 15	26306021	G	A	SNV	0	0.5	0	0	0	95	44	39	29	31	in EWC
Chr 15	26382191	C	T	SNV	0	0	0.542857	0	0	97	40	35	27	45	in EWC
Chr 15	27599746	T	G	SNV	0	0	0	0.568182	0	114	40	30	44	39	in EWC
Chr 15	28482503	T	G	SNV	0	0	0	0.533333	0	94	29	39	30	33	in EWC
Chr 15	28797576	T	C	SNV	0	0	0	0.588235	0	118	20	30	34	24	in EWC
Chr 15	29863022	T	A	SNV	0	0	0	0.527778	0	92	34	33	36	36	in EWC
Chr 15	29958666	T	G	SNV	0	0	0	0	0.5625	58	33	35	33	32	in EWC
Chr 15	29979887	T	G	SNV	0	0.030303	0	0.55814	0	80	33	44	43	44	in EWC
Chr 15	30266444	C	G	SNV	0	0	0	0	0.625	98	34	48	39	40	in EWC
Chr 15	30410171	T	C	SNV	0	0.515152	0	0	0	79	33	33	35	41	in EWC
Chr 15	31912288	T	C	SNV	0	0	0	0	0.4375	97	31	43	46	32	in EWC
Chr 15	32370335	G	A	SNV	0	0	0	0	0.5625	92	41	41	31	32	in EWC
Chr 15	33704097	T	A	SNV	0	0	0	0.369565	0	83	32	38	46	55	in EWC
Chr 15	36837825	T	C	SNV	0	0.5625	0	0	0	70	48	58	47	44	in EWC
Chr 15	37055210	T	G	SNV	0	0	0	0.541667	0	92	41	49	48	46	in EWC
Chr 15	38732924	T	C	SNV	0	0.5	0	0	0	84	52	39	46	56	in EWC
Chr 15	38997104	T	G	SNV	0	0.636364	0	0	0	108	44	31	51	49	in EWC
Chr 15	40310857	T	C	SNV	0	0.589744	0	0	0	91	39	40	33	45	in EWC
Chr 15	40749650	T	G	SNV	0.010989	0.538462	0	0	0	91	26	23	35	37	in EWC
Chr 15	40939511	G	A	SNV	0	0.486486	0	0	0	124	37	32	29	46	in EWC
Chr 15	41254325	G	A	SNV	0	0	0	0.651163	0	92	42	56	43	44	in EWC
Chr 15	41602968	G	A	SNV	0	0.787879	0	0	0	71	33	58	49	50	in EWC
Chr 15	43351923	C	T	SNV	0	0	0	0	0.432432	73	34	25	33	37	in EWC
Chr 15	43376915	T	C	SNV	0	0	0	0.551724	0	76	30	43	29	45	in EWC
Chr 15	45180390	G	A	SNV	0	0	0.384615	0	0	122	35	26	33	41	in EWC
Chr 15	45180707	C	T	SNV	0	0	0.372093	0	0	116	42	43	37	30	in EWC
Chr 15	45973633	T	G	SNV	0	0	0	0.5	0	100	37	33	38	37	in EWC
Chr 15	46953785	T	A	SNV	0.00990099	0.578947	0	0	0	101	19	32	37	34	in EWC
Chr 15	48096228	C	A	SNV	0	0.03125	0	0.47619	0	95	32	23	21	40	in EWC
Chr 15	48676412	A	T	SNV	0	0.666667	0	0	0	98	30	31	41	42	in EWC
Chr 15	48763519	TC	AT	Multisite	0	0.571429	0	0	0	112	21	35	34	30	in EWC
Chr 15	51247864	C	T	SNV	0	0	0	0.382353	0	137	34	33	34	34	in EWC
Chr 15	53718683	G	A	SNV	0	0	0.540541	0	0	102	38	37	31	48	in EWC
Chr 15	55621465	T	G	SNV	0	0	0	0	0.551724	99	37	28	37	29	in EWC
Chr 15	56949403	T	G	SNV	0	0	0	0	0.468085	86	35	27	33	47	in EWC
Chr 15	57178197	A	T	SNV	0	0	0	0.648649	0	87	24	36	37	52	in EWC
Chr 15	61717062	T	C	SNV	0	0	0.025	0.545455	0	80	36	40	44	39	in EWC
Chr 15	65464686	T	C	SNV	0	0.432432	0	0	0	98	37	27	41	43	in EWC
Chr 15	66014229	A	G	SNV	0	0.62069	0	0	0	73	29	36	46	38	in EWC
Chr 15	70062533	T	C	SNV	0	0	0	0	0.478261	71	23	30	35	46	in EWC
Chr 15	70523745	C	T	SNV	0.0410959	0	0	0	0.448276	73	28	24	35	29	in EWC
Chr 15	70577792	T	C	SNV	0	0	0	0	0.5	99	28	31	25	26	in EWC
Chr 15	71017401	C	T	SNV	0	0	0	0	0.5	87	23	39	36	36	in EWC
Chr 15	71140060	T	C	SNV	0	0	0	0.514286	0	95	34	25	35	49	in EWC
Chr 15	71395370	A	G	SNV	0	0	0	0.44	0	81	40	38	25	38	in EWC
Chr 15	72152467	T	C	SNV	0	0.44186	0	0	0	95	43	37	35	33	in EWC
Chr 15	72788480	G	A	SNV	0	0.025641	0	0.413793	0	81	39	29	29	35	in EWC
Chr 15	72892780	G	A	SNV	0	0	0	0	0.40625	84	51	50	49	32	in EWC
Chr 15	74200674	T	G	SNV	0	0	0	0.595238	0	75	47	38	42	37	in EWC
Chr 15	74657068	T	G	SNV	0	0.54717	0	0	0	105	53	56	53	51	in EWC
Chr 15	76331233	C	T	SNV	0	0	0	0	0.47619	93	55	47	48	42	in EWC
Chr 15	79459978	T	G	SNV	0	0.4	0	0	0	104	60	57	50	50	in EWC
Chr 15	81056237	T	C	SNV	0	0.52381	0	0	0	88	42	43	49	37	in EWC
Chr 15	81199797	T	C	SNV	0	0.4	0	0	0	58	40	46	41	44	in EWC
Chr 15	82432799	G	A	SNV	0	0	0	0	0.5	97	40	36	45	38	in EWC
Chr 15	82699416	T	C	SNV	0	0.46	0	0	0	112	50	51	39	37	in EWC
Chr 15	82784232	T	A	SNV	0	0.45614	0	0	0	101	57	46	49	49	in EWC
Chr 15	84066082	T	G	SNV	0	0.534884	0	0	0	104	43	41	34	57	in EWC
Chr 15	84594182	T	G	SNV	0	0.454545	0	0	0	60	33	37	39	52	in EWC
Chr 15	84745608	G	A	SNV	0	0	0	0.521739	0	94	48	49	46	41	in EWC
Chr 15	86094189	T	A	SNV	0	0.595745	0	0	0	99	47	65	36	44	in EWC
Chr 15	86094235	T	C	SNV	0	0.37037	0	0	0	102	54	56	36	49	in EWC
Chr 15	86168158	T	C	SNV	0	0.512821	0	0	0	84	39	39	38	36	in EWC
Chr 15	86810717	T	G	SNV	0	0	0.4375	0	0	82	39	32	33	22	in EWC
Chr 15	87061114	A	G	SNV	0	0.37037	0	0	0	74	27	32	33	50	in EWC
Chr 15	87963777	G	A	SNV	0	0	0	0	0.530612	67	22	34	35	49	in EWC
Chr 15	88047865	A	C	SNV	0	0.478261	0	0	0	120	46	42	33	28	in EWC
Chr 15	88572149	G	A	SNV	0	0	0.520833	0	0	85	42	48	43	36	in EWC
Chr 15	89004472	T	A	SNV	0	0.571429	0	0	0	83	42	59	41	48	in EWC
Chr 15	89240375	A	T	SNV	0	0	0	0	0.439024	84	42	42	36	41	in EWC
Chr 15	89491150	T	G	SNV	0	0.52	0	0	0	107	50	42	53	63	in EWC
Chr 15	91511747	T	G	SNV	0	0.45	0	0	0	101	40	48	37	28	in EWC
Chr 15	91682052	T	A	SNV	0	0	0	0.382353	0	105	36	30	34	35	in EWC
Chr 15	92591798	T	G	SNV	0	0	0	0.346154	0	98	31	41	26	30	in EWC
Chr 15	94845219	A	G	SNV	0	0	0	0	0.52381	103	27	28	35	42	in EWC
Chr 15	95147536	A	G	SNV	0	0	0	0.375	0	78	44	36	32	32	in EWC
Chr 15	95682118	T	C	SNV	0	0.463415	0	0	0	100	41	42	55	50	in EWC
Chr 15	95844473	T	C	SNV	0	0.382979	0	0	0.0243902	74	47	49	38	41	in EWC
Chr 15	97223990	G	A	SNV	0	0	0.522727	0	0	70	41	44	36	34	in EWC
Chr 15	99068162	T	G	SNV	0	0.351852	0	0	0	65	54	39	52	56	in EWC
Chr 15	101444335	T	C	SNV	0	0.526316	0	0	0	79	38	47	34	50	in EWC
Chr 15	102213429	T	G	SNV	0	0.512195	0.0212766	0	0	71	41	47	41	51	in EWC
Chr 15	102248800	T	C	SNV	0.0108696	0.490196	0	0	0	92	51	46	39	46	in EWC
Chr 15	102378711	A	G	SNV	0	0.541667	0	0	0	88	48	57	51	61	in EWC
Chr 15	103553174	T	C	SNV	0	0	0.55814	0	0	84	44	43	52	41	in EWC
Chr 16	5214668	T	G	SNV	0	0.558824	0	0	0	94	34	49	48	39	in EWC
Chr 16	5385566	A	G	SNV	0	0	0.4375	0	0	110	46	32	45	42	in EWC
Chr 16	5890114	A	C	SNV	0	0	0.405405	0	0	90	36	37	33	31	in EWC
Chr 16	6234821	A	G	SNV	0	0	0	0.580645	0	82	30	31	31	36	in EWC
Chr 16	6378210	G	A	SNV	0	0.484848	0	0	0	125	33	32	32	32	in EWC
Chr 16	7927964	T	A	SNV	0	0	0	0.487805	0	65	27	30	41	34	in EWC
Chr 16	8276656	T	G	SNV	0	0	0	0.6	0	101	40	29	55	45	in EWC
Chr 16	8611662	G	A	SNV	0	0	0.454545	0	0	106	44	33	52	45	in EWC
Chr 16	9009327	T	C	SNV	0	0.628571	0	0	0	84	35	35	47	38	in EWC
Chr 16	11724328	T	C	SNV	0	0	0	0.414634	0	108	41	38	41	45	in EWC
Chr 16	11954373	T	G	SNV	0	0.391304	0	0	0	82	46	38	42	33	in EWC
Chr 16	12921181	G	A	SNV	0	0.333333	0	0	0	85	30	39	41	32	in EWC
Chr 16	12994350	T	G	SNV	0	0.459459	0	0	0	118	37	51	42	53	in EWC
Chr 16	14583767	T	G	SNV	0	0.444444	0	0	0	84	27	41	42	36	in EWC
Chr 16	14596459	T	C	SNV	0	0.648649	0	0	0	106	37	39	34	42	in EWC
Chr 16	14672143	C	T	SNV	0	0	0.481481	0	0	89	35	54	44	39	in EWC
Chr 16	14713595	T	G	SNV	0	0	0	0.517857	0	108	38	41	56	49	in EWC
Chr 16	16445115	A	C	SNV	0	0	0.434783	0	0	121	36	46	49	50	in EWC
Chr 16	16708409	T	G	SNV	0	0.489362	0	0	0	97	47	36	39	40	in EWC
Chr 16	19281756	T	G	SNV	0	0	0	0	0.404255	75	32	42	42	47	in EWC
Chr 16	19528792	A	C	SNV	0	0	0	0.560976	0	100	41	52	41	48	in EWC
Chr 16	20608916	T	C	SNV	0	0.490909	0	0	0	85	55	44	49	52	in EWC
Chr 16	21053642	T	C	SNV	0	0	0	0.586957	0	86	35	38	46	39	in EWC
Chr 16	22633299	A	C	SNV	0	0	0.515152	0	0	127	41	33	43	50	in EWC
Chr 16	22881901	T	G	SNV	0	0	0	0.555556	0.0204082	83	34	32	36	49	in EWC
Chr 16	24147389	T	A	SNV	0	0.348837	0	0	0	116	43	37	48	35	in EWC
Chr 16	24654774	G	A	SNV	0	0	0	0.387755	0	118	34	30	49	34	in EWC
Chr 16	24935011	T	C	SNV	0	0.452381	0	0	0	89	42	37	43	33	in EWC
Chr 16	25773347	T	C	SNV	0	0	0	0.525	0	108	32	25	40	34	in EWC
Chr 16	25986553	G	T	SNV	0	0	0	0.441176	0	113	35	39	34	41	in EWC
Chr 16	29400843	A	C	SNV	0	0	0	0.454545	0	106	34	30	44	37	in EWC
Chr 16	29674667	A	G	SNV	0	0	0	0	0.396226	88	52	43	46	53	in EWC
Chr 16	32316031	T	C	SNV	0	0.46	0	0	0	111	50	43	37	36	in EWC
Chr 16	35743038	G	A	SNV	0	0	0	0	0.48	102	36	54	39	50	in EWC
Chr 16	36564620	C	T	SNV	0	0	0	0.0232558	0.435897	110	47	36	43	39	in EWC
Chr 16	37260518	T	A	SNV	0	0.4	0	0	0	86	40	38	37	39	in EWC
Chr 16	38620997	T	C	SNV	0	0.435897	0	0	0	68	39	33	47	51	in EWC
Chr 16	39279808	T	G	SNV	0	0	0	0.4375	0	105	27	37	32	30	in EWC
Chr 16	39730914	T	G	SNV	0	0	0	0	0.472222	97	37	32	38	36	in EWC
Chr 16	39738610	A	T	SNV	0	0	0	0.470588	0	80	32	39	34	33	in EWC
Chr 16	40292282	A	C	SNV	0	0	0	0.607143	0	65	22	32	28	22	in EWC
Chr 16	40445279	A	G	SNV	0	0	0	0.511111	0	68	37	35	45	36	in EWC
Chr 16	44000877	C	T	SNV	0	0	0	0	0.378378	73	36	47	42	37	in EWC
Chr 16	46882536	T	C	SNV	0	0	0	0.487179	0	81	23	41	39	44	in EWC
Chr 16	48246437	T	A	SNV	0	0.607843	0	0	0	79	51	39	51	36	in EWC
Chr 16	48746917	T	C	SNV	0	0	0	0.512195	0	84	31	33	41	44	in EWC
Chr 16	49355397	C	T	SNV	0	0	0.452381	0	0	97	30	42	32	43	in EWC
Chr 16	50767049	A	C	SNV	0	0.486486	0	0	0	107	37	45	39	39	in EWC
Chr 16	52000147	A	C	SNV	0	0	0.545455	0	0	112	30	33	36	34	in EWC
Chr 16	52494575	A	C	SNV	0	0	0.555556	0	0	115	35	27	31	35	in EWC
Chr 16	53932104	A	G	SNV	0	0	0	0.5	0	85	25	31	24	32	in EWC
Chr 16	54493983	A	G	SNV	0	0	0	0.518519	0	99	38	39	27	23	in EWC
Chr 16	54637070	A	C	SNV	0.00952381	0	0.636364	0	0	105	32	22	47	27	in EWC
Chr 16	54848107	T	G	SNV	0	0	0	0.6	0	93	31	35	35	43	in EWC
Chr 16	56375700	T	C	SNV	0	0	0	0.473684	0	83	32	38	38	39	in EWC
Chr 16	56941187	T	C	SNV	0	0	0	0	0.585366	72	47	44	36	41	in EWC
Chr 16	57067950	A	C	SNV	0	0	0.416667	0	0.0285714	75	51	24	38	35	in EWC
Chr 16	58591508	A	C	SNV	0	0	0.447368	0	0	98	33	38	36	34	in EWC
Chr 16	59921014	C	G	SNV	0	0.631579	0	0	0	85	38	32	31	36	in EWC
Chr 16	60079476	A	G	SNV	0	0	0.488889	0	0	97	30	45	31	37	in EWC
Chr 16	60782592	T	G	SNV	0	0	0	0.5	0	87	30	29	44	26	in EWC
Chr 16	61231612	T	C	SNV	0	0.5	0	0	0	126	24	30	44	42	in EWC
Chr 16	61611057	A	T	SNV	0	0	0	0	0.484848	101	26	26	38	33	in EWC
Chr 16	62562001	A	G	SNV	0	0	0	0.548387	0	85	23	28	31	34	in EWC
Chr 16	63059981	G	T	SNV	0	0	0	0.488889	0	73	28	31	45	32	in EWC
Chr 16	63352076	A	G	SNV	0	0	0	0.48	0	79	25	39	25	23	in EWC
Chr 16	66690636	C	T	SNV	0	0.382979	0	0	0	127	47	20	33	29	in EWC
Chr 16	68046143	A	C	SNV	0	0	0.04	0	0.6	125	23	25	31	35	in EWC
Chr 16	68596883	T	A	SNV	0	0	0	0.416667	0	63	23	34	36	22	in EWC
Chr 16	68902581	G	A	SNV	0	0	0.433333	0	0	112	31	30	26	35	in EWC
Chr 16	68908126	A	C	SNV	0	0	0.547619	0	0.0357143	132	34	42	26	28	in EWC
Chr 16	69352573	C	T	SNV	0	0	0.433333	0	0	80	19	30	35	41	in EWC
Chr 16	69434076	T	G	SNV	0	0	0	0.4	0	101	31	19	30	28	in EWC
Chr 16	69796761	T	C	SNV	0	0	0.5	0	0	86	25	34	33	28	in EWC
Chr 16	70157494	T	G	SNV	0	0	0	0	0.631579	108	30	33	36	38	in EWC
Chr 16	70526391	T	A	SNV	0	0	0	0	0.628571	112	30	39	32	35	in EWC
Chr 16	70698682	GG	TT	Multisite	0	0	0.5	0	0	139	34	30	32	35	in EWC
Chr 16	70767940	A	C	SNV	0	0	0	0.638889	0	118	34	29	36	48	in EWC
Chr 16	71332241	T	G	SNV	0	0	0	0.475	0.0714286	96	33	26	40	28	in EWC
Chr 16	71622117	A	C	SNV	0	0.4375	0	0.0333333	0	121	32	29	30	43	in EWC
Chr 16	71674137	C	T	SNV	0	0	0	0.432432	0	119	45	32	37	38	in EWC
Chr 16	71693567	T	G	SNV	0	0	0.533333	0	0	109	26	30	27	25	in EWC
Chr 16	71698539	C	A	SNV	0	0	0.538462	0	0	106	28	39	44	42	in EWC
Chr 16	72522498	A	C	SNV	0	0	0	0.526316	0	101	42	41	38	39	in EWC
Chr 16	72577973	T	G	SNV	0	0.451613	0	0	0.0344828	93	31	34	40	29	in EWC
Chr 16	73827656	T	A	SNV	0	0	0.4375	0	0	96	30	32	41	30	in EWC
Chr 16	75124806	T	C	SNV	0	0	0.466667	0	0	96	36	30	35	34	in EWC
Chr 16	78149313	T	C	SNV	0	0.454545	0	0	0	75	33	37	32	27	in EWC
Chr 16	78332508	G	T	SNV	0	0.518519	0	0.03125	0	105	27	36	32	42	in EWC
Chr 16	78702569	T	C	SNV	0	0	0	0	0.555556	100	35	42	44	36	in EWC
Chr 16	79262260	C	A	SNV	0.021978	0	0	0.5	0	91	34	33	34	39	in EWC
Chr 16	80022676	A	T	SNV	0	0	0	0.482759	0	77	24	28	29	44	in EWC
Chr 16	80355806	T	G	SNV	0	0	0	0.517241	0	103	36	37	29	26	in EWC
Chr 16	80930092	A	T	SNV	0	0.464286	0	0	0	94	28	31	34	30	in EWC
Chr 16	81958220	T	C	SNV	0	0	0	0.475	0	119	33	25	40	32	in EWC
Chr 16	82325327	G	A	SNV	0	0	0.344828	0	0	97	32	29	35	38	in EWC
Chr 16	82738513	G	T	SNV	0	0	0.575758	0	0	111	28	33	34	41	in EWC
Chr 16	82773317	A	C	SNV	0	0	0	0.416667	0	102	25	41	36	35	in EWC
Chr 16	83135196	A	C	SNV	0	0	0	0.444444	0	97	25	36	27	31	in EWC
Chr 16	83224108	T	C	SNV	0	0	0.517241	0	0	125	24	29	31	33	in EWC
Chr 16	83496838	C	G	SNV	0	0	0	0.521739	0	86	30	36	23	37	in EWC
Chr 16	83570359	T	G	SNV	0	0	0.485714	0.030303	0	100	36	35	33	25	in EWC
Chr 16	83605077	T	A	SNV	0.00840336	0	0.595238	0	0	119	34	42	41	34	in EWC
Chr 16	83857384	T	C	SNV	0	0.517241	0	0	0	87	29	35	36	37	in EWC
Chr 16	83930196	A	G	SNV	0	0	0	0.594595	0	99	36	41	37	40	in EWC
Chr 16	83973406	T	C	SNV	0	0	0	0.405405	0	100	29	25	37	32	in EWC
Chr 16	84124300	A	G	SNV	0	0	0	0	0.6	127	32	47	27	35	in EWC
Chr 16	85963735	C	T	SNV	0	0	0	0.536585	0	118	38	37	41	41	in EWC
Chr 16	86896451	A	C	SNV	0	0	0	0.375	0	128	23	30	32	41	in EWC
Chr 16	86912016	C	G	SNV	0	0	0	0	0.5	82	30	35	38	42	in EWC
Chr 16	88458414	T	G	SNV	0	0	0	0	0.431818	96	43	35	32	44	in EWC
Chr 16	89225531	A	T	SNV	0	0	0.527778	0	0	79	30	36	39	43	in EWC
Chr 16	89652639	T	G	SNV	0	0	0	0.375	0	95	50	56	48	39	in EWC
Chr 16	90072207	T	C	SNV	0	0	0	0.465116	0	91	43	40	43	54	in EWC
Chr 16	93043947	G	A	SNV	0	0	0	0.4	0	84	32	31	40	37	in EWC
Chr 16	93223957	T	C	SNV	0	0.526316	0	0	0	65	38	37	32	30	in EWC
Chr 16	94727909	T	G	SNV	0	0.62	0	0	0	68	50	32	41	42	in EWC
Chr 16	95067299	T	G	SNV	0	0	0.558824	0	0	94	46	34	44	35	in EWC
Chr 16	95499054	A	C	SNV	0	0	0.441176	0	0	85	39	34	40	46	in EWC
Chr 16	96158502	T	G	SNV	0	0.4	0	0.0192308	0	95	50	60	52	46	in EWC
Chr 16	96546983	C	T	SNV	0	0	0	0	0.636364	101	24	45	35	44	in EWC
Chr 16	96813542	A	G	SNV	0	0.363636	0	0	0	133	44	37	42	37	in EWC
Chr 16	97399261	A	C	SNV	0	0	0	0.459459	0	91	41	48	37	46	in EWC
Chr 16	97957381	C	G	SNV	0	0	0	0	0.451613	78	45	40	51	31	in EWC
Chr 17	3623815	A	T	SNV	0	0	0	0.514286	0	80	23	38	35	31	in EWC
Chr 17	4234368	T	C	SNV	0	0.515152	0	0	0	107	33	33	37	46	in EWC
Chr 17	4334136	A	T	SNV	0	0	0	0.414634	0	66	34	36	41	38	in EWC
Chr 17	12817804	C	T	SNV	0	0	0.571429	0	0	107	51	42	43	29	in EWC
Chr 17	14121569	A	G	SNV	0	0.553191	0	0	0	58	47	46	40	31	in EWC
Chr 17	14170374	A	G	SNV	0	0	0	0	0.486486	69	34	33	42	37	in EWC
Chr 17	14484330	T	G	SNV	0	0	0	0.485714	0	96	43	51	35	53	in EWC
Chr 17	14511134	G	A	SNV	0	0	0	0.5	0	97	43	45	38	36	in EWC
Chr 17	15948323	A	G	SNV	0	0	0	0.425532	0	137	38	44	47	50	in EWC
Chr 17	16105645	C	A	SNV	0	0	0	0.674419	0	93	33	41	43	37	in EWC
Chr 17	16519926	T	C	SNV	0	0.636364	0	0	0	72	33	42	40	36	in EWC
Chr 17	16643671	A	G	SNV	0	0	0	0.630435	0	106	41	43	46	44	in EWC
Chr 17	17790293	C	A	SNV	0	0	0	0.540541	0	88	44	52	37	48	in EWC
Chr 17	17921728	A	C	SNV	0	0.542857	0	0	0	111	35	53	36	50	in EWC
Chr 17	17998738	T	A	SNV	0	0	0.472222	0	0	87	42	36	42	41	in EWC
Chr 17	18144960	A	C	SNV	0	0	0	0	0.65	94	37	35	58	40	in EWC
Chr 17	19041672	T	C	SNV	0	0	0	0	0.452381	96	36	37	35	42	in EWC
Chr 17	19151998	A	C	SNV	0	0	0	0.4	0	115	19	45	40	31	in EWC
Chr 17	19629954	T	A	SNV	0	0	0	0	0.482759	110	27	37	33	29	in EWC
Chr 17	19902555	T	G	SNV	0	0	0	0.511628	0	123	35	34	43	21	in EWC
Chr 17	20417178	A	G	SNV	0	0	0	0.7	0	86	38	30	20	36	in EWC
Chr 17	20501571	A	C	SNV	0	0	0	0	0.448276	106	36	36	42	29	in EWC
Chr 17	20505760	T	G	SNV	0	0	0.452381	0	0.0526316	93	31	42	43	38	in EWC
Chr 17	22059368	T	C	SNV	0	0	0.517241	0	0	114	42	58	47	55	in EWC
Chr 17	22775324	T	G	SNV	0	0	0	0.461538	0	82	41	52	39	47	in EWC
Chr 17	29033738	A	T	SNV	0.118812	0	0	0	0.517241	101	35	48	54	58	in EWC	MosJ 33	0.118812	0.109076	0.000600962	0.000849798	0.000798085	0.527759
Chr 17	29974618	A	G	SNV	0	0.586207	0	0	0	53	29	53	39	33	in EWC
Chr 17	30554494	T	C	SNV	0	0	0.454545	0	0	66	43	33	47	39	in EWC
Chr 17	31333993	C	T	SNV	0	0	0	0.386364	0	101	50	40	44	54	in EWC
Chr 17	33469904	T	G	SNV	0	0.0208333	0.472222	0	0	89	48	36	44	40	in EWC
Chr 17	33511173	A	G	SNV	0.0131579	0.470588	0	0	0	76	34	50	41	36	in EWC
Chr 17	36702129	A	G	SNV	0	0	0	0.488372	0	82	36	42	43	36	in EWC
Chr 17	38841979	T	G	SNV	0	0	0.486486	0	0	89	23	37	32	31	in EWC
Chr 17	39032010	A	C	SNV	0	0	0	0.619048	0	97	41	49	42	32	in EWC
Chr 17	39063726	G	A	SNV	0	0	0.466667	0	0	104	35	30	31	41	in EWC
Chr 17	39471101	T	G	SNV	0	0	0	0.6	0	108	28	44	30	38	in EWC
Chr 17	40001347	T	C	SNV	0	0	0	0.387097	0	97	27	40	31	44	in EWC
Chr 17	40028058	T	G	SNV	0	0	0.555556	0	0	88	44	45	35	40	in EWC
Chr 17	40431723	A	T	SNV	0	0.432432	0	0	0	100	37	41	47	48	in EWC
Chr 17	40526847	A	C	SNV	0	0	0	0.47619	0	96	54	51	42	35	in EWC
Chr 17	41513112	A	T	SNV	0	0.487179	0	0	0	100	39	43	41	52	in EWC
Chr 17	41970664	A	C	SNV	0	0	0.413793	0	0	104	28	29	47	32	in EWC
Chr 17	43695609	T	G	SNV	0	0.55814	0	0	0	87	43	52	44	43	in EWC
Chr 17	45538198	C	T	SNV	0	0.537037	0	0	0	83	54	54	57	44	in EWC
Chr 17	48285830	G	A	SNV	0	0	0	0	0.452381	88	42	46	34	42	in EWC
Chr 17	48461291	A	G	SNV	0	0.531915	0	0	0	92	47	55	42	42	in EWC
Chr 17	49491857	C	T	SNV	0	0	0	0.441176	0	97	33	27	34	36	in EWC
Chr 17	51929173	A	G	SNV	0	0	0	0.575758	0	95	31	39	33	26	in EWC
Chr 17	52260161	A	G	SNV	0	0	0	0.428571	0	95	38	28	28	23	in EWC
Chr 17	52938928	A	G	SNV	0	0	0.4	0	0	98	47	50	37	35	in EWC
Chr 17	54435992	A	C	SNV	0	0	0	0.583333	0	87	40	29	24	39	in EWC
Chr 17	54491184	T	C	SNV	0	0	0	0	0.4	113	35	45	37	25	in EWC
Chr 17	54794398	A	G	SNV	0	0	0.394737	0	0	102	33	38	40	36	in EWC
Chr 17	55034413	T	G	SNV	0	0	0.578947	0	0	76	29	38	32	30	in EWC
Chr 17	55235563	T	A	SNV	0	0	0	0	0.545455	101	20	26	33	33	in EWC
Chr 17	55399728	C	T	SNV	0	0.4	0	0	0	93	35	38	29	49	in EWC
Chr 17	55441768	T	A	SNV	0	0	0.513514	0	0	117	44	37	43	42	in EWC
Chr 17	55521400	A	C	SNV	0	0	0	0.4	0	100	32	40	35	54	in EWC
Chr 17	55609309	T	A	SNV	0	0	0	0	0.411765	86	36	43	55	51	in EWC
Chr 17	55687129	T	G	SNV	0	0	0.454545	0	0	85	29	33	34	35	in EWC
Chr 17	56070679	T	C	SNV	0	0.596154	0	0	0	94	52	39	43	53	in EWC
Chr 17	57217272	C	T	SNV	0	0.366667	0	0	0	110	30	47	38	39	in EWC
Chr 17	57785899	C	G	SNV	0	0	0.4	0	0	65	33	25	50	40	in EWC
Chr 17	58281713	T	G	SNV	0	0	0	0	0.431373	87	34	41	27	51	in EWC
Chr 17	58496366	A	T	SNV	0	0.44	0	0	0	99	25	27	29	33	in EWC
Chr 17	58766217	C	T	SNV	0	0.5	0	0	0	84	22	33	24	32	in EWC
Chr 17	58781852	T	G	SNV	0	0	0.518519	0	0	74	32	27	20	34	in EWC
Chr 17	58897830	T	G	SNV	0	0	0	0	0.484848	99	33	34	57	33	in EWC
Chr 17	58955887	T	G	SNV	0	0	0	0.481481	0	102	22	41	27	46	in EWC
Chr 17	60014534	A	C	SNV	0	0	0	0.571429	0	102	31	38	28	38	in EWC
Chr 17	60276597	T	A	SNV	0	0.652174	0	0	0	90	23	25	32	30	in EWC
Chr 17	62235857	A	C	SNV	0	0	0	0.5	0	119	39	26	32	29	in EWC
Chr 17	62639865	A	G	SNV	0	0	0	0.5625	0	79	37	35	32	33	in EWC
Chr 17	62735081	A	T	SNV	0	0	0	0	0.571429	84	21	29	40	21	in EWC
Chr 17	64881862	T	G	SNV	0	0.512821	0	0	0	117	39	36	36	43	in EWC
Chr 17	65080449	G	A	SNV	0	0	0	0	0.522727	95	42	29	42	44	in EWC
Chr 17	65421347	A	C	SNV	0	0	0.568182	0	0	102	32	44	47	46	in EWC
Chr 17	65492796	T	G	SNV	0	0.510204	0	0	0	108	49	55	49	50	in EWC
Chr 17	66562695	A	C	SNV	0	0	0	0	0.45098	89	50	54	40	51	in EWC
Chr 17	68816390	A	C	SNV	0	0	0	0.52381	0	86	35	34	42	42	in EWC
Chr 17	68868374	ATGG	A	INDEL	0	0	0.6	0	0	103	22	25	41	49	in EWC
Chr 17	69530298	A	C	SNV	0	0	0	0.487805	0	77	34	40	41	37	in EWC
Chr 17	71414043	A	C	SNV	0	0.5	0	0	0	102	36	43	54	56	in EWC
Chr 17	71573351	GT	G	INDEL	0	0.405405	0	0	0	90	37	41	40	37	in EWC
Chr 17	72285594	A	G	SNV	0	0	0	0.52381	0	102	31	34	21	46	in EWC
Chr 17	72884314	T	G	SNV	0	0.552632	0	0	0	99	38	39	54	41	in EWC
Chr 17	73485047	A	C	SNV	0	0.405405	0	0.0294118	0	83	37	32	34	22	in EWC
Chr 17	74401357	T	G	SNV	0	0.566038	0	0	0	78	53	38	35	52	in EWC
Chr 17	75709676	T	G	SNV	0	0	0.571429	0	0	90	33	42	43	40	in EWC
Chr 17	75882152	C	A	SNV	0	0	0.636364	0	0	105	38	33	30	34	in EWC
Chr 17	76269366	G	A	SNV	0	0.518519	0	0	0	117	27	34	23	41	in EWC
Chr 17	76319530	A	C	SNV	0	0	0	0.4	0	75	38	30	30	29	in EWC
Chr 17	76817806	A	G	SNV	0	0	0	0.5	0	97	27	20	36	33	in EWC
Chr 17	77974943	A	C	SNV	0	0.529412	0	0	0	82	17	28	22	35	in EWC
Chr 17	79528613	A	C	SNV	0	0.694444	0	0	0	115	36	45	31	45	in EWC
Chr 17	80318819	A	C	SNV	0.00925926	0.382979	0.04	0	0	108	47	50	43	38	in EWC
Chr 17	81254979	G	GT	Multisite #3	0	0	0	0.347826	0	81	37	31	23	51	in EWC
Chr 17	81254991	G	GTT	Multisite #3	0	0	0	0.533333	0	81	35	31	30	48	in EWC
Chr 17	81757596	A	G	SNV	0	0.511628	0	0	0	80	43	28	42	45	in EWC
Chr 17	81872267	G	T	SNV	0	0	0.470588	0	0	67	31	34	26	23	in EWC
Chr 17	82634752	A	G	SNV	0	0.571429	0	0	0	116	28	26	33	29	in EWC
Chr 17	83586515	T	G	SNV	0	0.463415	0	0	0.0169492	89	41	43	51	59	in EWC
Chr 17	84424721	T	G	SNV	0	0.52381	0	0	0	111	42	33	43	33	in EWC
Chr 17	84680966	T	A	SNV	0	0	0.694444	0	0	96	40	36	42	46	in EWC
Chr 17	86143512	T	C	SNV	0	0.6	0	0	0	99	40	39	52	37	in EWC
Chr 17	87174270	C	T	SNV	0	0	0.529412	0	0	66	41	51	46	39	in EWC
Chr 17	88772268	A	G	SNV	0	0.348837	0	0.0243902	0.0294118	80	43	35	41	34	in EWC
Chr 17	90220535	A	C	SNV	0	0.555556	0	0	0	111	27	31	34	32	in EWC
Chr 17	90795320	T	A	SNV	0.00909091	0	0.463415	0	0	110	25	41	37	50	in EWC
Chr 17	91201751	G	A	SNV	0	0	0	0.588235	0	113	31	22	34	40	in EWC
Chr 17	91519009	A	T	SNV	0	0	0	0.419355	0	106	34	37	31	29	in EWC
Chr 17	91824395	A	C	SNV	0	0	0	0.488889	0	101	23	28	45	27	in EWC
Chr 17	92027321	A	T	SNV	0	0	0	0.513514	0	102	29	33	37	31	in EWC
Chr 17	92207203	A	C	SNV	0	0	0.5625	0	0	86	28	32	42	31	in EWC
Chr 17	92704679	T	A	SNV	0	0	0	0.555556	0	96	35	28	36	41	in EWC
Chr 17	92965990	T	C	SNV	0	0	0.387097	0	0	75	22	31	39	35	in EWC
Chr 17	93276743	T	C	SNV	0	0	0	0.510638	0	111	42	38	47	41	in EWC
Chr 17	93876015	A	T	SNV	0	0	0	0	0.567568	106	27	36	37	37	in EWC
Chr 18	6279239	A	C	SNV	0	0.547619	0	0	0	106	42	45	36	32	in EWC
Chr 18	9577793	T	G	SNV	0	0.03125	0	0.575	0	73	32	42	40	32	in EWC
Chr 18	9712597	TCTTC	CCTTT	Multisite	0	0	0	0.526316	0	68	33	40	38	43	in EWC
Chr 18	12295945	C	T	SNV	0	0	0	0.532258	0	87	41	42	62	63	in EWC
Chr 18	13585003	A	G	SNV	0	0	0	0	0.565217	67	26	32	36	23	in EWC
Chr 18	14358618	A	G	SNV	0	0	0	0.509434	0	104	36	43	53	35	in EWC
Chr 18	15999439	A	C	SNV	0	0.375	0	0	0	94	32	31	28	38	in EWC
Chr 18	16300275	T	G	SNV	0	0.378378	0.027027	0	0	105	37	37	42	48	in EWC
Chr 18	16472210	A	G	SNV	0	0	0	0	0.59375	124	47	29	37	32	in EWC
Chr 18	16711801	A	C	SNV	0	0.548387	0	0	0	85	31	24	24	36	in EWC
Chr 18	17492365	A	C	SNV	0	0.358974	0	0	0	81	39	37	32	37	in EWC
Chr 18	18269877	A	C	SNV	0	0	0	0.552632	0	96	30	39	38	30	in EWC
Chr 18	18418161	G	A	SNV	0	0	0.0294118	0	0.410256	102	30	34	30	39	in EWC
Chr 18	18854200	A	G	SNV	0	0.392857	0	0	0	84	28	36	38	38	in EWC
Chr 18	19016236	T	C	SNV	0	0	0	0.414634	0	96	23	36	41	50	in EWC
Chr 18	19109384	A	G	SNV	0	0	0.5	0	0	113	25	24	44	44	in EWC
Chr 18	19501191	A	C	SNV	0	0.482759	0	0	0	118	29	33	39	37	in EWC
Chr 18	22587969	A	T	SNV	0	0	0	0.447368	0.030303	81	29	42	38	33	in EWC
Chr 18	22839889	A	C	SNV	0	0	0	0	0.538462	90	32	32	36	39	in EWC
Chr 18	23133115	T	G	SNV	0	0	0	0.419355	0	84	27	26	31	39	in EWC
Chr 18	25001757	A	G	SNV	0	0.473684	0.0196078	0	0	90	38	51	49	41	in EWC
Chr 18	26818829	T	C	SNV	0.010989	0.030303	0	0.0232558	0.529412	91	33	28	43	51	in EWC
Chr 18	27147733	T	G	SNV	0	0	0	0.458333	0	103	30	44	24	29	in EWC
Chr 18	29930164	A	T	SNV	0	0	0.472222	0	0	94	47	36	40	39	in EWC
Chr 18	30624834	A	C	SNV	0.0169492	0	0	0.48	0	59	38	25	25	38	in EWC
Chr 18	35110657	A	G	SNV	0	0.404762	0	0	0	93	42	41	35	53	in EWC
Chr 18	36453075	A	G	SNV	0	0.647059	0	0	0	90	34	41	47	49	in EWC
Chr 18	36996390	T	C	SNV	0	0	0	0	0.477273	68	34	30	29	44	in EWC
Chr 18	39300171	A	G	SNV	0	0.552632	0	0	0	121	38	31	21	29	in EWC
Chr 18	40804273	A	G	SNV	0	0.527778	0	0	0	83	36	33	29	34	in EWC
Chr 18	41066746	T	A	SNV	0	0	0	0.541667	0	106	24	26	24	37	in EWC
Chr 18	44078760	C	T	SNV	0	0	0	0.482759	0	86	34	56	29	38	in EWC
Chr 18	44338803	C	A	SNV	0	0	0.025641	0.435897	0	110	39	39	39	44	in EWC
Chr 18	45701789	A	C	SNV	0.00840336	0	0	0	0.5	119	40	37	67	32	in EWC
Chr 18	45759130	A	G	SNV	0	0.5	0	0	0	121	36	47	39	46	in EWC
Chr 18	46812526	C	T	SNV	0	0	0	0.5	0	99	34	43	34	62	in EWC
Chr 18	47987865	A	T	SNV	0	0.55	0	0	0	104	20	36	27	32	in EWC
Chr 18	48078117	T	C	SNV	0	0	0	0.484848	0	95	34	38	33	42	in EWC
Chr 18	48296428	T	G	SNV	0	0	0	0	0.5	103	34	32	35	48	in EWC
Chr 18	49831649	T	A	SNV	0	0	0	0.591837	0	105	40	34	49	37	in EWC
Chr 18	50048466	G	T	SNV	0	0	0	0.525	0	117	40	45	40	34	in EWC
Chr 18	52087038	A	G	SNV	0	0	0	0.466667	0	94	30	45	30	44	in EWC
Chr 18	53138335	A	C	SNV	0	0.422222	0	0.0222222	0	81	45	33	45	33	in EWC
Chr 18	54428754	G	A	SNV	0	0	0	0.530612	0	118	27	35	49	37	in EWC
Chr 18	57095088	C	A	SNV	0	0	0.545455	0	0	71	38	44	32	34	in EWC
Chr 18	57529471	A	G	SNV	0	0	0	0.487179	0	93	29	38	39	45	in EWC
Chr 18	58844150	A	C	SNV	0	0.464286	0	0.0333333	0	99	28	34	30	33	in EWC
Chr 18	60472148	A	C	SNV	0	0.53125	0.0212766	0.0625	0	105	32	47	32	30	in EWC
Chr 18	62604404	G	A	SNV	0	0	0	0.484848	0	82	41	31	33	35	in EWC
Chr 18	62726093	G	T	SNV	0	0.378378	0	0	0	95	37	33	41	29	in EWC
Chr 18	63282986	A	T	SNV	0	0	0	0.551724	0	103	29	38	29	40	in EWC
Chr 18	64598127	T	A	SNV	0	0	0	0	0.558824	67	43	30	36	34	in EWC
Chr 18	67672797	C	T	SNV	0	0	0	0	0.469388	105	42	41	49	49	in EWC
Chr 18	68218913	T	C	SNV	0	0	0.479167	0	0	67	35	48	39	34	in EWC
Chr 18	68972073	A	C	SNV	0	0	0.0204082	0.578947	0	89	40	49	38	37	in EWC
Chr 18	69852267	C	T	SNV	0	0	0	0	0.5	104	36	39	34	46	in EWC
Chr 18	69861604	GCCTCAGTCCATGCATTGC	G	INDEL	0	0	0	0	0.521739	89	29	34	25	23	in EWC
Chr 18	70816961	T	C	SNV	0	0	0	0	0.578947	92	42	28	42	38	in EWC
Chr 18	70854654	T	G	SNV	0	0.358974	0	0	0.0238095	105	39	42	43	42	in EWC
Chr 18	70912850	G	T	SNV	0	0	0	0	0.472222	100	37	33	50	36	in EWC
Chr 18	71584698	C	T	SNV	0	0.72973	0	0	0	119	37	37	43	34	in EWC
Chr 18	72103956	T	G	SNV	0	0	0	0.628571	0	125	30	32	35	42	in EWC
Chr 18	72619750	G	A	SNV	0	0	0	0.648649	0	107	29	24	37	32	in EWC
Chr 18	72780186	T	G	SNV	0	0	0	0	0.567568	110	31	31	31	37	in EWC
Chr 18	72811901	A	G	SNV	0	0	0	0	0.583333	106	36	37	29	36	in EWC
Chr 18	74484651	T	C	SNV	0	0.0263158	0.621622	0	0	59	38	37	43	34	in EWC
Chr 18	74955864	A	G	SNV	0	0	0	0	0.487805	74	39	29	42	41	in EWC
Chr 18	76382166	A	C	SNV	0	0	0.555556	0	0	53	34	45	38	34	in EWC
Chr 18	76852794	A	C	SNV	0	0	0	0.534884	0	109	36	47	43	45	in EWC
Chr 18	76978157	A	G	SNV	0	0	0.577778	0	0	94	43	45	44	37	in EWC
Chr 18	78157769	A	G	SNV	0	0.466667	0	0	0	76	30	54	36	42	in EWC
Chr 18	78569117	T	G	SNV	0	0	0.363636	0	0	111	32	33	36	33	in EWC
Chr 18	78818673	T	G	SNV	0	0	0	0.69697	0	92	34	30	33	47	in EWC
Chr 18	78926824	A	C	SNV	0	0	0	0.533333	0	87	28	32	30	37	in EWC
Chr 18	80309739	TC	CT	Multisite	0	0	0.567568	0	0	72	34	37	42	38	in EWC
Chr 18	80995550	A	G	SNV	0	0.75	0	0	0	78	28	30	37	46	in EWC
Chr 18	81105116	T	G	SNV	0	0	0.416667	0	0	101	32	36	31	35	in EWC
Chr 18	81416047	C	T	SNV	0	0	0.375	0	0	90	35	40	38	28	in EWC
Chr 18	81493266	G	T	SNV	0	0	0	0	0.473684	94	43	27	29	38	in EWC
Chr 18	85595694	T	G	SNV	0	0	0	0.407407	0	68	33	27	27	45	in EWC
Chr 18	85607745	A	C	SNV	0	0.55	0	0	0.027027	75	40	28	35	37	in EWC
Chr 18	85944592	G	T	SNV	0.00900901	0	0.047619	0	0.473684	111	29	21	40	38	in EWC
Chr 18	86112957	G	A	SNV	0	0	0	0.625	0	83	24	24	32	29	in EWC
Chr 18	87265680	A	T	SNV	0	0	0.478261	0	0	92	31	46	32	37	in EWC
Chr 18	87418131	T	G	SNV	0	0.533333	0	0	0	103	30	37	22	36	in EWC
Chr 18	87494149	A	C	SNV	0	0	0	0.571429	0	112	27	32	35	28	in EWC
Chr 19	4287511	G	A	SNV	0	0	0	0.482143	0	88	28	37	56	43	in EWC
Chr 19	7419175	T	G	SNV	0	0.588235	0	0	0	83	34	49	44	33	in EWC
Chr 19	7495976	G	C	SNV	0.15493	0	0	0.434783	0	71	52	48	46	52	in EWC	MosJ 35	0.15493	0.136322	0.0009298	0	0.500191	0
Chr 19	9066983	T	A	SNV	0	0	0	0.46	0	101	48	35	50	49	in EWC
Chr 19	9809911	A	G	SNV	0	0	0	0.512821	0	69	38	53	39	47	in EWC
Chr 19	10850137	T	G	SNV	0	0.574468	0	0	0	86	47	49	42	32	in EWC
Chr 19	11080266	A	T	SNV	0	0	0.509804	0	0	105	50	51	43	45	in EWC
Chr 19	11182646	C	A	SNV	0	0.0204082	0.394737	0	0	90	49	38	39	44	in EWC
Chr 19	11482051	A	G	SNV	0	0	0.483871	0	0	87	46	31	37	43	in EWC
Chr 19	11839247	T	G	SNV	0	0.5	0	0	0	92	44	40	29	51	in EWC
Chr 19	12654627	T	C	SNV	0	0.363636	0	0	0	94	44	38	27	37	in EWC
Chr 19	14108242	T	G	SNV	0	0	0	0.566667	0	87	35	38	30	42	in EWC
Chr 19	15469744	G	C	SNV	0	0	0	0	0.518519	85	29	35	45	27	in EWC
Chr 19	15511778	T	C	SNV	0	0.485714	0	0	0	117	35	40	36	42	in EWC
Chr 19	16145293	T	C	SNV	0	0.5	0	0	0	84	50	46	38	37	in EWC
Chr 19	17814325	C	A	SNV	0	0	0	0	0.542857	89	28	24	22	35	in EWC
Chr 19	19593090	T	A	SNV	0	0	0	0.413793	0	99	35	39	29	31	in EWC
Chr 19	24148118	A	G	SNV	0	0	0	0.466667	0	97	45	35	45	35	in EWC
Chr 19	26850743	T	G	SNV	0	0	0.52381	0	0	101	32	42	35	44	in EWC
Chr 19	27109683	A	G	SNV	0	0	0	0.571429	0	98	33	48	42	43	in EWC
Chr 19	28930722	T	G	SNV	0	0.411765	0	0	0	89	34	36	45	52	in EWC
Chr 19	29731396	G	A	SNV	0	0	0	0.542373	0	91	42	51	59	47	in EWC
Chr 19	29742837	CT	C	INDEL	0	0	0	0.446809	0	146	51	48	47	54	in EWC
Chr 19	32820533	T	G	SNV	0	0.472222	0	0	0	102	36	36	31	45	in EWC
Chr 19	33465400	C	T	SNV	0	0	0	0.371429	0	79	36	32	35	37	in EWC
Chr 19	33552056	A	T	SNV	0	0	0.571429	0	0	70	36	35	39	45	in EWC
Chr 19	33851137	A	G	SNV	0	0	0	0.5	0	95	22	25	26	36	in EWC
Chr 19	33871894	T	G	SNV	0	0.35	0	0	0	111	40	39	33	40	in EWC
Chr 19	34051353	T	G	SNV	0	0.62963	0	0	0	98	27	34	33	35	in EWC
Chr 19	35106757	T	G	SNV	0	0	0	0.677419	0	99	25	42	31	35	in EWC
Chr 19	35377754	T	C	SNV	0	0	0	0.588235	0	109	36	33	34	31	in EWC
Chr 19	35730343	A	C	SNV	0	0	0	0	0.516129	95	30	35	27	31	in EWC
Chr 19	36018469	G	A	SNV	0	0	0	0.551724	0	107	30	50	29	42	in EWC
Chr 19	36934856	T	G	SNV	0	0.529412	0	0	0	98	51	40	46	35	in EWC
Chr 19	39339745	T	G	SNV	0	0	0	0.609756	0	91	32	40	41	37	in EWC
Chr 19	39756882	A	C	SNV	0	0	0.525	0	0	108	40	40	38	38	in EWC
Chr 19	40165356	A	G	SNV	0	0	0	0	0.44898	102	40	34	43	49	in EWC
Chr 19	41679973	T	C	SNV	0	0.475	0	0	0	75	40	32	48	54	in EWC
Chr 19	42056978	T	C	SNV	0	0	0	0.0144928	0.433333	104	38	48	69	60	in EWC
Chr 19	43165361	TTCACTA	CTCACTC	Multisite	0	0.52381	0	0	0	74	42	27	29	36	in EWC
Chr 19	44146054	T	G	SNV	0.0123457	0	0	0	0.5	81	38	38	35	46	in EWC
Chr 19	44344852	T	C	SNV	0	0.565217	0.0212766	0	0	83	46	47	53	40	in EWC
Chr 19	46292496	G	T	SNV	0	0	0.508772	0	0	84	45	57	45	46	in EWC
Chr 19	49213652	A	C	SNV	0	0	0	0.5	0	104	23	21	24	30	in EWC
Chr 19	49773889	A	G	SNV	0	0.578947	0	0	0	102	19	25	31	32	in EWC
Chr 19	50046371	T	A	SNV	0	0	0	0.617647	0	123	27	34	34	36	in EWC
Chr 19	50264422	T	G	SNV	0	0	0.484848	0	0	86	29	33	29	27	in EWC
Chr 19	50369605	T	G	SNV	0	0	0	0	0.571429	127	25	35	29	35	in EWC
Chr 19	50770382	T	C	SNV	0	0	0	0.484848	0	109	22	43	33	33	in EWC
Chr 19	51454099	A	T	SNV	0	0	0	0.535714	0	82	25	32	28	23	in EWC
Chr 19	52556404	A	G	SNV	0	0	0	0.611111	0	100	32	32	36	32	in EWC
Chr 19	53457233	T	G	SNV	0	0.463415	0	0	0	77	41	52	41	45	in EWC
Chr 19	53483225	C	T	SNV	0	0	0	0	0.5	74	41	42	43	34	in EWC
Chr 19	53606140	T	C	SNV	0	0.584906	0	0	0	91	53	51	46	52	in EWC
Chr 19	54669455	A	C	SNV	0	0	0	0	0.575758	75	51	21	40	33	in EWC
Chr 19	56710076	A	T	SNV	0	0.5625	0	0	0	86	32	34	45	39	in EWC
Chr 19	56939567	A	T	SNV	0	0	0	0	0.381818	125	47	65	52	55	in EWC
Chr 19	58496167	T	A	SNV	0.0107527	0.433333	0	0	0	93	30	35	29	25	in EWC
Chr 19	58708857	T	C	SNV	0	0.611111	0	0	0	74	36	32	30	32	in EWC
Chr 19	59164136	A	C	SNV	0	0	0.515152	0	0	69	23	33	30	41	in EWC
Chr 19	59902241	T	C	SNV	0	0.551724	0	0	0	92	29	35	26	32	in EWC
Chr 19	60670371	G	C	SNV	0	0.47619	0	0	0	71	42	47	38	36	in EWC
Chr 2	3054259	G	T	SNV	0	0.525	0	0	0	82	40	31	41	38	in EWC
Chr 2	7302273	A	C	SNV	0	0	0.5	0.0333333	0	88	45	22	30	46	in EWC
Chr 2	7334001	T	C	SNV	0	0	0	0.533333	0	104	23	29	30	31	in EWC
Chr 2	7622794	C	T	SNV	0	0.533333	0	0	0	81	30	26	38	28	in EWC
Chr 2	8836716	T	G	SNV	0	0	0	0	0.485714	99	37	28	32	35	in EWC
Chr 2	9829450	A	G	SNV	0	0.547619	0	0.0263158	0	112	42	33	38	30	in EWC
Chr 2	9907032	C	T	SNV	0.00990099	0	0.40625	0	0	101	65	32	41	43	in EWC
Chr 2	9916360	G	A	SNV	0	0.675676	0	0	0	94	37	42	43	42	in EWC
Chr 2	11288660	A	C	SNV	0	0.517241	0.030303	0	0	106	29	33	37	46	in EWC
Chr 2	13185475	A	T	SNV	0	0.566667	0	0	0	106	30	47	47	27	in EWC
Chr 2	14736432	C	T	SNV	0	0	0	0.525	0	88	24	40	40	34	in EWC
Chr 2	14765744	A	G	SNV	0	0.59375	0	0	0	108	32	47	46	35	in EWC
Chr 2	14808815	A	C	SNV	0	0.5	0	0	0	81	28	33	31	36	in EWC
Chr 2	15215175	T	C	SNV	0	0	0	0.634146	0	94	36	39	41	40	in EWC
Chr 2	15240779	A	C	SNV	0	0	0.0263158	0.468085	0	106	28	38	47	27	in EWC
Chr 2	17361902	T	G	SNV	0	0.025	0	0.511111	0	103	40	46	45	39	in EWC
Chr 2	18407437	T	G	SNV	0	0	0	0.44898	0	88	42	40	49	47	in EWC
Chr 2	18424432	A	T	SNV	0	0.487805	0	0	0	76	41	54	50	49	in EWC
Chr 2	18709415	T	G	SNV	0	0	0	0.583333	0	89	35	37	48	51	in EWC
Chr 2	19135144	T	G	SNV	0	0.625	0	0	0	86	32	35	45	31	in EWC
Chr 2	21515582	A	C	SNV	0	0	0	0	0.354839	73	36	35	38	31	in EWC
Chr 2	23763386	T	G	SNV	0	0	0	0.538462	0	108	33	30	39	42	in EWC
Chr 2	25377755	A	T	SNV	0	0.6	0	0	0	98	50	44	62	50	in EWC
Chr 2	25583058	A	C	SNV	0	0.595745	0	0	0	104	47	61	58	57	in EWC
Chr 2	29497904	G	A	SNV	0	0	0.625	0	0	108	48	32	41	45	in EWC
Chr 2	32532047	C	T	SNV	0	0	0	0	0.481481	93	54	52	54	54	in EWC
Chr 2	36459862	C	A	SNV	0	0	0.555556	0	0	90	32	27	30	37	in EWC
Chr 2	36588207	T	C	SNV	0	0	0	0	0.564103	85	37	41	41	39	in EWC
Chr 2	36633616	T	C	SNV	0	0	0.439024	0	0	95	33	41	37	41	in EWC
Chr 2	36692755	T	A	SNV	0	0	0.568627	0	0	81	45	51	46	39	in EWC
Chr 2	37602249	A	C	SNV	0	0.514286	0	0	0	93	35	47	44	42	in EWC
Chr 2	39798782	T	G	SNV	0	0	0.466667	0	0	81	30	30	34	33	in EWC
Chr 2	40376887	T	G	SNV	0	0	0	0.458333	0	96	30	32	24	28	in EWC
Chr 2	40475846	T	A	SNV	0	0	0.470588	0	0	83	43	34	23	39	in EWC
Chr 2	40553952	A	G	SNV	0	0	0	0.410256	0	109	24	34	39	31	in EWC
Chr 2	40717274	T	C	SNV	0	0	0.583333	0	0	94	32	36	33	33	in EWC
Chr 2	41142236	A	C	SNV	0	0.484848	0	0	0.03125	120	33	35	29	32	in EWC
Chr 2	41829608	C	A	SNV	0	0	0	0	0.583333	97	34	34	37	36	in EWC
Chr 2	42723361	C	T	SNV	0.011236	0	0.605263	0	0	89	40	38	23	35	in EWC
Chr 2	42783516	T	C	SNV	0	0	0	0.53125	0	68	36	28	32	41	in EWC
Chr 2	43379245	C	G	SNV	0	0	0	0.7	0	129	48	36	30	48	in EWC
Chr 2	45490328	T	A	SNV	0	0	0.407407	0	0	136	34	27	41	33	in EWC
Chr 2	45807715	T	C	SNV	0	0	0	0.5	0	107	24	33	38	32	in EWC
Chr 2	46943816	A	G	SNV	0	0.5	0	0	0	104	34	27	27	29	in EWC
Chr 2	48393232	G	T	SNV	0	0	0.538462	0	0	92	47	39	32	37	in EWC
Chr 2	49428969	G	A	SNV	0	0	0	0	0.463415	105	32	37	48	41	in EWC
Chr 2	50725659	T	C	SNV	0	0	0	0.571429	0	77	39	51	35	37	in EWC
Chr 2	50837911	A	C	SNV	0	0.341463	0.0294118	0	0	83	41	34	46	31	in EWC
Chr 2	51402378	G	A	SNV	0	0	0	0.454545	0	99	37	32	33	32	in EWC
Chr 2	51420249	C	T	SNV	0	0	0	0.571429	0	119	27	34	35	45	in EWC
Chr 2	51430875	A	C	SNV	0	0.604167	0	0	0	122	48	37	32	45	in EWC
Chr 2	51832781	G	A	SNV	0	0.333333	0	0	0	62	30	39	43	42	in EWC
Chr 2	53389619	A	G	SNV	0	0	0	0.477273	0	115	28	28	44	38	in EWC
Chr 2	53402362	A	C	SNV	0	0.454545	0	0	0	76	33	47	33	36	in EWC
Chr 2	55709303	T	G	SNV	0	0	0	0.545455	0	90	27	34	33	36	in EWC
Chr 2	55769545	T	G	SNV	0	0	0.454545	0	0	107	37	22	37	37	in EWC
Chr 2	55851032	T	G	SNV	0	0	0	0	0.538462	116	35	36	28	26	in EWC
Chr 2	56893072	T	G	SNV	0	0.394737	0	0	0	106	38	39	41	51	in EWC
Chr 2	57037328	A	C	SNV	0	0	0	0.365385	0	57	32	43	52	37	in EWC
Chr 2	58409759	A	C	SNV	0	0.439024	0	0	0	104	41	37	42	37	in EWC
Chr 2	58821959	T	A	SNV	0.0142857	0	0.5	0	0	70	38	48	48	40	in EWC
Chr 2	59169435	T	C	SNV	0	0	0	0.53125	0	99	40	50	32	40	in EWC
Chr 2	62641841	A	G	SNV	0	0	0	0	0.414634	139	34	38	38	41	in EWC
Chr 2	62971548	G	A	SNV	0.00892857	0	0	0	0.46875	112	36	33	32	32	in EWC
Chr 2	65623218	A	C	SNV	0	0	0	0	0.382353	99	37	42	37	34	in EWC
Chr 2	65721095	T	G	SNV	0	0	0.526316	0	0	107	51	38	44	44	in EWC
Chr 2	66670975	A	G	SNV	0	0.368421	0	0	0	107	19	51	36	41	in EWC
Chr 2	67110302	C	T	SNV	0	0	0	0.545455	0	94	41	34	33	41	in EWC
Chr 2	68605379	A	C	SNV	0	0.5	0.0294118	0	0	89	28	34	32	48	in EWC
Chr 2	68967311	T	C	SNV	0	0	0.36	0	0	101	47	25	47	41	in EWC
Chr 2	71023047	A	G	SNV	0	0.444444	0	0	0	89	27	43	39	39	in EWC
Chr 2	72003156	A	G	SNV	0.0108696	0.590909	0	0	0	92	44	31	41	27	in EWC
Chr 2	72939537	A	T	SNV	0	0.52	0	0	0	106	50	35	35	53	in EWC
Chr 2	74925134	T	G	SNV	0	0	0.478261	0	0	114	27	46	52	61	in EWC
Chr 2	75807058	A	C	SNV	0	0.431373	0	0	0	95	51	60	32	42	in EWC
Chr 2	76323960	A	G	SNV	0	0.405405	0	0	0	94	37	59	49	53	in EWC
Chr 2	76480872	G	A	SNV	0	0	0	0	0.520833	105	34	39	36	48	in EWC
Chr 2	76515386	A	G	SNV	0	0.367347	0	0	0	87	49	60	63	52	in EWC
Chr 2	77051691	A	C	SNV	0	0.697674	0	0	0	99	43	40	43	38	in EWC
Chr 2	77115516	A	T	SNV	0	0	0	0	0.534884	97	33	36	40	43	in EWC
Chr 2	82224800	A	C	SNV	0	0	0	0	0.459459	117	28	34	38	37	in EWC
Chr 2	82811445	C	G	SNV	0	0	0	0.62069	0	107	26	21	29	32	in EWC
Chr 2	82848026	T	G	SNV	0	0.684211	0	0	0	113	19	24	39	33	in EWC
Chr 2	83908884	A	G	SNV	0	0.526316	0	0	0	111	38	39	39	31	in EWC
Chr 2	85908238	C	T	SNV	0	0	0	0	0.545455	82	27	25	25	33	in EWC
Chr 2	86689512	A	C	SNV	0	0	0.641026	0	0	122	36	39	37	46	in EWC
Chr 2	86870164	T	C	SNV	0	0	0	0.5625	0	98	28	30	32	32	in EWC
Chr 2	87081127	A	G	SNV	0	0	0	0.375	0	93	27	28	40	24	in EWC
Chr 2	89379232	T	G	SNV	0	0	0	0	0.44	74	34	25	26	25	in EWC
Chr 2	91783946	A	C	SNV	0	0.529412	0	0	0	93	34	46	42	64	in EWC
Chr 2	92070578	A	T	SNV	0	0.509804	0	0	0	59	51	48	52	34	in EWC
Chr 2	92173348	A	T	SNV	0	0.566667	0	0	0	65	30	41	45	32	in EWC
Chr 2	92645676	C	T	SNV	0	0	0	0	0.666667	89	44	47	45	39	in EWC
Chr 2	92862352	A	C	SNV	0	0.457143	0	0	0	96	35	42	40	53	in EWC
Chr 2	93274596	A	C	SNV	0	0.485714	0.0222222	0	0	86	35	45	41	45	in EWC
Chr 2	94686186	T	G	SNV	0	0.5625	0	0	0	87	32	42	33	30	in EWC
Chr 2	95440912	A	C	SNV	0	0	0	0	0.4	113	34	38	18	20	in EWC
Chr 2	95753506	A	C	SNV	0	0	0	0.423077	0	88	26	32	26	28	in EWC
Chr 2	96806207	T	G	SNV	0	0.36	0	0	0	62	25	35	28	41	in EWC
Chr 2	99220581	T	C	SNV	0	0	0.428571	0	0	107	17	21	31	36	in EWC
Chr 2	99243784	C	T	SNV	0	0	0.5	0	0	90	26	24	30	33	in EWC
Chr 2	99504140	A	C	SNV	0	0	0.592593	0	0	127	18	27	24	40	in EWC
Chr 2	99813175	A	C	SNV	0	0	0	0	0.5	120	30	27	33	28	in EWC
Chr 2	99814512	C	T	SNV	0	0	0.454545	0	0	62	34	33	26	39	in EWC
Chr 2	99822792	A	C	SNV	0	0	0.454545	0	0	117	30	33	32	45	in EWC
Chr 2	100096387	A	C	SNV	0	0	0	0.36	0	97	31	19	25	38	in EWC
Chr 2	100447698	C	T	SNV	0	0	0	0.586207	0	128	25	32	29	47	in EWC
Chr 2	100933318	A	C	SNV	0	0	0	0	0.56	114	32	32	25	25	in EWC
Chr 2	101001987	A	G	SNV	0	0.37037	0	0	0	96	27	37	32	42	in EWC
Chr 2	101229257	A	G	SNV	0	0	0	0	0.5	82	22	26	38	36	in EWC
Chr 2	101722716	G	A	SNV	0	0.351351	0	0	0	96	37	39	37	44	in EWC
Chr 2	102816893	A	C	SNV	0	0.521739	0	0	0	107	46	29	25	47	in EWC
Chr 2	102880902	G	A	SNV	0	0	0	0	0.486486	80	23	27	30	37	in EWC
Chr 2	102899513	A	T	SNV	0	0.5	0	0	0	104	30	43	41	41	in EWC
Chr 2	103341554	A	C	SNV	0	0	0	0	0.375	85	33	50	42	40	in EWC
Chr 2	103814603	T	C	SNV	0	0	0	0	0.52	95	43	44	41	50	in EWC
Chr 2	103933793	A	C	SNV	0	0.025641	0	0	0.5	94	39	42	36	42	in EWC
Chr 2	104401943	A	C	SNV	0	0.547619	0	0	0	78	42	38	44	49	in EWC
Chr 2	104537102	A	G	SNV	0	0	0	0.512195	0	79	24	40	41	35	in EWC
Chr 2	104670750	A	C	SNV	0.0108696	0.459459	0	0	0	92	37	47	39	30	in EWC
Chr 2	105272793	A	C	SNV	0	0	0.480769	0	0	78	47	52	44	47	in EWC
Chr 2	105325972	T	C	SNV	0	0	0.513514	0	0	97	39	37	47	54	in EWC
Chr 2	105505506	T	G	SNV	0	0	0	0.567568	0	87	33	29	37	48	in EWC
Chr 2	106155476	G	C	SNV	0	0	0	0	0.411765	81	34	35	36	34	in EWC
Chr 2	106235918	A	T	SNV	0	0	0	0	0.459459	85	36	38	34	37	in EWC
Chr 2	107015680	A	C	SNV	0	0	0	0.575758	0	90	39	47	33	37	in EWC
Chr 2	107771253	G	T	SNV	0	0.515152	0	0	0	85	33	31	33	31	in EWC
Chr 2	110585481	A	AT	INDEL	0	0	0	0.547619	0	76	22	26	42	33	in EWC
Chr 2	110920766	A	G	SNV	0	0	0.354839	0	0	137	23	31	35	28	in EWC
Chr 2	110923375	A	T	SNV	0.00877193	0	0	0	0.384615	114	30	25	32	26	in EWC
Chr 2	113006444	A	T	SNV	0	0	0	0.511628	0	97	26	46	43	52	in EWC
Chr 2	113054310	A	C	SNV	0	0	0	0.571429	0	101	37	37	28	42	in EWC
Chr 2	113174840	C	T	SNV	0	0	0	0.444444	0	114	35	34	36	30	in EWC
Chr 2	113207262	A	C	SNV	0	0.47619	0.030303	0.0294118	0	90	21	33	34	42	in EWC
Chr 2	115409265	A	C	SNV	0	0	0	0.435897	0	105	35	35	39	53	in EWC
Chr 2	115958669	A	C	SNV	0	0	0	0.365854	0	92	40	38	41	58	in EWC
Chr 2	116596671	A	G	SNV	0	0	0	0	0.548387	117	48	31	38	31	in EWC
Chr 2	116610861	A	G	SNV	0	0.590909	0	0	0	93	44	35	42	54	in EWC
Chr 2	116711250	A	C	SNV	0	0.46875	0	0	0	97	32	39	45	39	in EWC
Chr 2	118362226	A	T	SNV	0	0.366667	0	0	0	94	30	37	49	49	in EWC
Chr 2	118521034	A	C	SNV	0	0.540541	0.027027	0.02	0	97	37	37	50	52	in EWC
Chr 2	118630588	G	A	SNV	0	0.547619	0	0	0	97	42	42	45	33	in EWC
Chr 2	119972463	GC	TT	Multisite	0	0.475	0	0	0	61	40	40	40	55	in EWC
Chr 2	121735620	A	G	SNV	0	0	0	0.423077	0.0217391	100	46	55	52	46	in EWC
Chr 2	122958757	T	G	SNV	0	0	0	0.463415	0	76	36	26	41	53	in EWC
Chr 2	123588777	T	G	SNV	0	0	0	0.433333	0	96	30	39	30	44	in EWC
Chr 2	123596628	A	G	SNV	0	0	0	0	0.407407	99	29	47	37	27	in EWC
Chr 2	124648559	A	G	SNV	0	0.030303	0	0	0.619048	119	33	37	33	42	in EWC
Chr 2	124792637	G	A	SNV	0	0	0.5625	0	0	79	32	32	38	32	in EWC
Chr 2	126513400	T	G	SNV	0	0	0	0	0.333333	89	53	41	44	33	in EWC
Chr 2	129644114	A	G	SNV	0	0.48	0	0	0	106	50	32	47	36	in EWC
Chr 2	133085822	A	T	SNV	0	0	0	0.666667	0	87	35	36	21	38	in EWC
Chr 2	133604768	T	A	SNV	0	0.464286	0	0	0	106	28	34	43	38	in EWC
Chr 2	133749146	T	G	SNV	0	0.485714	0	0	0	90	35	28	45	31	in EWC
Chr 2	135111426	T	C	SNV	0	0	0.458333	0	0	79	36	24	31	48	in EWC
Chr 2	136151596	C	T	SNV	0	0	0	0	0.487805	98	38	48	46	41	in EWC
Chr 2	136250901	T	G	SNV	0	0.594595	0	0	0	106	37	30	28	42	in EWC
Chr 2	138549714	A	G	SNV	0	0.416667	0	0	0	58	24	29	30	31	in EWC
Chr 2	139025928	T	C	SNV	0	0	0.03125	0	0.391304	89	27	32	30	23	in EWC
Chr 2	139145601	T	C	SNV	0	0.517241	0	0	0	117	29	34	35	31	in EWC
Chr 2	139322232	T	G	SNV	0	0.642857	0	0	0	89	28	26	32	36	in EWC
Chr 2	140339556	G	A	SNV	0	0	0	0.5	0	88	43	40	50	44	in EWC
Chr 2	141389694	T	G	SNV	0	0.0344828	0	0.53125	0	114	29	32	32	31	in EWC
Chr 2	141855799	A	G	SNV	0	0	0	0.6	0	106	32	27	30	30	in EWC
Chr 2	143585943	A	C	SNV	0	0	0	0	0.566667	81	31	42	40	30	in EWC
Chr 2	144989702	T	C	SNV	0	0	0.547619	0	0	96	44	42	49	42	in EWC
Chr 2	145262328	A	T	SNV	0	0.543478	0	0	0	86	46	32	45	38	in EWC
Chr 2	148316647	A	C	SNV	0	0.605263	0	0	0	113	38	33	40	29	in EWC
Chr 2	148484488	C	T	SNV	0	0.466667	0	0	0	88	30	33	33	33	in EWC
Chr 2	149725152	A	T	SNV	0.00961538	0.0277778	0.413793	0	0	104	36	29	39	40	in EWC
Chr 2	150083436	A	C	SNV	0	0.393939	0	0	0	83	33	31	39	42	in EWC
Chr 2	152439741	A	T	SNV	0	0.5625	0	0	0	78	32	36	48	46	in EWC
Chr 2	152597822	A	C	SNV	0	0	0.0357143	0.392857	0	91	29	28	28	29	in EWC
Chr 2	152741842	A	G	SNV	0	0	0	0	0.666667	102	33	48	53	42	in EWC
Chr 2	152800591	G	A	SNV	0	0	0	0	0.438596	87	40	53	44	57	in EWC
Chr 2	153948446	A	G	SNV	0	0.468085	0	0	0	83	47	47	45	50	in EWC
Chr 2	154526003	A	C	SNV	0	0.583333	0	0	0	87	36	48	50	50	in EWC
Chr 2	154967710	A	G	SNV	0	0.55814	0	0	0	89	43	59	45	55	in EWC
Chr 2	155901239	A	G	SNV	0	0	0	0	0.5	88	48	58	52	56	in EWC
Chr 2	157092008	A	C	SNV	0	0	0	0.527273	0	80	52	43	55	61	in EWC
Chr 2	157214004	C	T	SNV	0	0	0	0.5	0	86	36	38	58	74	in EWC
Chr 2	158081898	A	T	SNV	0	0.529412	0	0	0	84	34	48	35	42	in EWC
Chr 2	161603629	C	A	SNV	0	0	0	0.65625	0	105	45	28	32	31	in EWC
Chr 2	162847913	T	A	SNV	0	0	0.433962	0	0	72	40	53	44	48	in EWC
Chr 2	164395922	A	G	SNV	0	0.533333	0	0	0	78	45	47	46	44	in EWC
Chr 2	166685228	A	G	SNV	0	0.5	0	0	0	94	48	44	48	46	in EWC
Chr 2	168042585	A	C	SNV	0	0.488372	0	0	0	77	43	44	42	51	in EWC
Chr 2	170588391	T	G	SNV	0	0	0.558824	0	0	104	40	34	30	41	in EWC
Chr 2	170955222	A	C	SNV	0	0	0.484848	0	0	81	38	33	44	54	in EWC
Chr 2	171557789	A	C	SNV	0.01	0	0.487805	0	0	100	32	41	38	44	in EWC
Chr 2	171668069	G	A	SNV	0	0	0	0	0.390244	98	47	42	40	41	in EWC
Chr 2	172165425	C	G	SNV	0	0	0	0.44898	0	109	40	39	49	35	in EWC
Chr 2	174873122	T	C	SNV	0	0	0.526316	0	0	72	33	38	34	51	in EWC
Chr 2	178329095	C	A	SNV	0.021978	0	0	0	0.5	91	39	41	30	36	in EWC
Chr 2	179646784	C	T	SNV	0	0	0	0.372093	0	61	34	39	43	37	in EWC
Chr 2	179763390	T	C	SNV	0	0	0.617647	0	0	101	36	34	42	29	in EWC
Chr 2	181832112	T	G	SNV	0	0	0.451613	0	0	109	37	31	42	49	in EWC
Chr 3	3107725	T	G	SNV	0	0	0	0.53125	0	83	36	29	32	37	in EWC
Chr 3	4359026	A	T	SNV	0	0	0.432432	0	0	98	22	37	37	41	in EWC
Chr 3	5489102	A	C	SNV	0	0	0	0	0.466667	118	29	29	33	45	in EWC
Chr 3	5845603	A	T	SNV	0	0	0	0.388889	0	99	22	29	36	35	in EWC
Chr 3	6052957	A	T	SNV	0	0	0	0.45	0	106	38	35	40	25	in EWC
Chr 3	6110518	T	G	SNV	0	0	0	0.678571	0	113	38	27	28	32	in EWC
Chr 3	6612249	T	A	SNV	0	0.526316	0	0	0	89	38	32	32	30	in EWC
Chr 3	6924232	T	C	SNV	0	0	0	0.457143	0	91	37	46	35	29	in EWC
Chr 3	7122730	A	G	SNV	0	0	0	0.580645	0	81	35	41	31	29	in EWC
Chr 3	9722501	G	A	SNV	0	0	0.533333	0	0	90	33	60	36	39	in EWC
Chr 3	10784304	T	C	SNV	0	0.435897	0	0	0	101	39	36	38	38	in EWC
Chr 3	10824266	A	G	SNV	0	0	0.5	0	0	59	32	36	31	28	in EWC
Chr 3	13350972	G	A	SNV	0	0	0	0	0.340909	89	32	41	36	44	in EWC
Chr 3	13385891	C	A	SNV	0.00917431	0.473684	0	0	0	109	19	38	35	27	in EWC
Chr 3	13880581	G	A	SNV	0	0	0	0	0.475	79	31	39	34	40	in EWC
Chr 3	16421233	G	T	SNV	0	0	0	0.71875	0	105	39	39	32	45	in EWC
Chr 3	17671426	CT	C	INDEL	0	0	0	0	0.590909	90	35	39	36	44	in EWC
Chr 3	18200514	G	T	SNV	0	0.0277778	0.333333	0	0	100	36	27	40	43	in EWC
Chr 3	18730814	A	T	SNV	0	0	0	0.5	0	117	38	36	38	34	in EWC
Chr 3	20882741	C	T	SNV	0	0	0.387755	0	0	92	39	49	33	35	in EWC
Chr 3	22659534	T	C	SNV	0	0	0.411765	0	0	73	38	51	31	46	in EWC
Chr 3	22766999	C	T	SNV	0	0	0	0.525	0	105	40	35	40	39	in EWC
Chr 3	23544840	GA	G	INDEL	0	0	0	0.37931	0	82	24	22	29	30	in EWC
Chr 3	23587019	T	A	SNV	0	0.366667	0	0	0	102	30	23	29	43	in EWC
Chr 3	25352760	A	C	SNV	0	0	0	0.36	0	104	32	29	25	30	in EWC
Chr 3	25461748	T	G	SNV	0	0	0	0	0.375	93	37	33	31	40	in EWC
Chr 3	25482107	T	G	SNV	0	0	0.457143	0	0	102	33	35	34	25	in EWC
Chr 3	25822365	G	T	SNV	0	0.341463	0	0	0	104	41	31	36	33	in EWC
Chr 3	26476121	A	G	SNV	0	0	0.470588	0	0	86	39	34	30	32	in EWC
Chr 3	26679026	A	G	SNV	0	0	0	0.37037	0	120	41	34	27	32	in EWC
Chr 3	27466968	G	T	SNV	0	0.0222222	0.520833	0	0	107	45	48	52	40	in EWC
Chr 3	27653917	T	A	SNV	0	0.342857	0	0	0	95	35	39	47	44	in EWC
Chr 3	27844604	T	G	SNV	0	0.457143	0	0	0	78	35	40	46	32	in EWC
Chr 3	28325582	A	T	SNV	0	0	0	0.560976	0	92	39	31	41	44	in EWC
Chr 3	32205325	T	G	SNV	0	0.4	0	0	0	97	55	48	30	40	in EWC
Chr 3	33111562	A	C	SNV	0	0	0	0	0.564103	105	37	50	47	39	in EWC
Chr 3	33271969	A	G	SNV	0	0.0285714	0.477273	0	0	126	35	44	35	35	in EWC
Chr 3	33419650	C	A	SNV	0	0	0.464286	0	0	81	35	28	44	36	in EWC
Chr 3	33680739	A	G	SNV	0	0	0.636364	0	0	100	33	44	41	37	in EWC
Chr 3	34088243	T	C	SNV	0	0.0204082	0	0	0.411765	96	49	42	47	51	in EWC
Chr 3	34397260	T	A	SNV	0	0	0	0	0.510638	84	49	35	42	47	in EWC
Chr 3	34641714	G	A	SNV	0	0	0	0	0.565217	95	38	39	39	46	in EWC
Chr 3	34935517	T	C	SNV	0	0.5	0	0	0	101	38	52	45	57	in EWC
Chr 3	35251036	T	G	SNV	0	0.538462	0	0	0	86	52	41	42	42	in EWC
Chr 3	36386862	T	G	SNV	0	0	0	0.477273	0	103	45	43	44	60	in EWC
Chr 3	36761600	A	C	SNV	0	0	0	0	0.447368	93	47	39	38	38	in EWC
Chr 3	36795649	T	C	SNV	0	0	0	0.48	0	69	32	47	50	47	in EWC
Chr 3	37430047	G	C	SNV	0	0.444444	0	0	0	136	36	31	35	63	in EWC
Chr 3	39649200	A	T	SNV	0	0.466667	0	0	0	92	30	39	37	34	in EWC
Chr 3	39968168	A	G	SNV	0	0.444444	0	0	0	117	27	43	25	38	in EWC
Chr 3	40057161	A	T	SNV	0	0	0	0.62069	0	117	37	46	29	40	in EWC
Chr 3	40216571	A	C	SNV	0	0.513514	0	0	0	96	37	31	36	46	in EWC
Chr 3	40775974	CTAT	C	INDEL	0	0.459459	0	0	0	86	37	46	40	43	in EWC
Chr 3	41625606	T	G	SNV	0	0.555556	0	0	0	119	36	51	41	62	in EWC
Chr 3	42469946	G	A	SNV	0	0	0.617647	0	0	95	34	34	39	39	in EWC
Chr 3	42733830	C	T	SNV	0	0	0	0	0.565217	104	25	23	38	23	in EWC
Chr 3	43181416	C	T	SNV	0	0	0	0.4375	0	77	27	43	32	31	in EWC
Chr 3	43391884	T	C	SNV	0	0	0	0	0.527778	95	20	25	46	36	in EWC
Chr 3	43454457	C	T	SNV	0	0	0.384615	0	0	97	31	26	36	31	in EWC
Chr 3	43633171	T	G	SNV	0	0.352941	0	0.0344828	0	77	17	24	29	39	in EWC
Chr 3	44494668	T	G	SNV	0	0.483871	0	0	0	102	31	29	23	29	in EWC
Chr 3	45362783	C	T	SNV	0	0	0	0.454545	0	118	22	33	33	32	in EWC
Chr 3	45709828	A	G	SNV	0	0	0.393939	0	0	103	28	33	33	39	in EWC
Chr 3	47130120	T	C	SNV	0	0	0	0.464286	0	110	24	35	28	37	in EWC
Chr 3	47144768	T	C	SNV	0	0	0	0.384615	0	98	28	30	26	27	in EWC
Chr 3	47267672	T	C	SNV	0	0	0	0.538462	0	101	31	46	26	36	in EWC
Chr 3	47724508	A	G	SNV	0	0	0	0.483871	0	92	35	25	31	36	in EWC
Chr 3	47804379	A	G	SNV	0	0	0	0.433333	0	103	32	40	30	32	in EWC
Chr 3	47821224	A	C	SNV	0	0	0	0	0.428571	144	29	39	23	35	in EWC
Chr 3	48210470	T	G	SNV	0	0.380952	0	0	0	87	42	37	23	29	in EWC
Chr 3	48672349	A	G	SNV	0	0.571429	0	0	0	81	35	27	36	30	in EWC
Chr 3	48924619	T	G	SNV	0	0	0	0.5	0	110	34	20	30	36	in EWC
Chr 3	49528338	T	C	SNV	0	0.451613	0	0	0	102	31	26	36	41	in EWC
Chr 3	50729185	A	C	SNV	0	0	0	0.361111	0	120	45	44	36	45	in EWC
Chr 3	51069935	G	A	SNV	0	0	0	0.027027	0.55	88	35	46	37	40	in EWC
Chr 3	51903990	T	A	SNV	0	0.46875	0	0	0	96	32	34	37	54	in EWC
Chr 3	52341210	A	G	SNV	0	0.465116	0	0	0	104	43	43	42	42	in EWC
Chr 3	54312236	T	G	SNV	0	0.384615	0	0.027027	0	92	39	30	37	31	in EWC
Chr 3	55290579	C	T	SNV	0	0	0	0	0.377778	75	27	49	27	45	in EWC
Chr 3	56065610	A	G	SNV	0	0	0.627907	0	0	96	29	43	35	40	in EWC
Chr 3	58220759	T	C	SNV	0	0	0	0.409091	0	91	33	38	44	40	in EWC
Chr 3	60248105	T	G	SNV	0	0	0	0.394737	0	116	30	39	38	40	in EWC
Chr 3	60934477	C	A	SNV	0	0	0	0.62963	0	116	29	30	27	27	in EWC
Chr 3	61727360	C	T	SNV	0	0	0	0.548387	0	64	42	38	31	36	in EWC
Chr 3	63767741	G	A	SNV	0	0.487805	0	0	0.025	104	41	48	45	40	in EWC
Chr 3	64421692	T	C	SNV	0	0	0	0.571429	0	86	39	26	35	40	in EWC
Chr 3	64704886	G	A	SNV	0.0120482	0	0	0	0.394737	83	33	31	30	38	in EWC
Chr 3	64750129	G	T	SNV	0	0	0	0.5	0	79	29	30	32	46	in EWC
Chr 3	65704603	A	C	SNV	0.0103093	0	0	0.520833	0	97	45	44	48	41	in EWC
Chr 3	66167417	T	C	SNV	0	0.447368	0	0	0	106	38	40	37	41	in EWC
Chr 3	67691919	T	G	SNV	0	0.409091	0	0	0	87	22	30	42	34	in EWC
Chr 3	67823468	A	C	SNV	0	0	0	0.59375	0	107	32	44	32	40	in EWC
Chr 3	68811203	A	C	Multisite #4	0	0	0.0212766	0.388889	0	81	59	47	36	43	in EWC
Chr 3	68811215	A	C	Multisite #4	0	0	0	0.368421	0	82	52	44	38	43	in EWC
Chr 3	68825629	A	C	SNV	0.00980392	0	0.0243902	0.487179	0	102	44	41	39	43	in EWC
Chr 3	69150873	T	G	SNV	0	0.44898	0	0	0	118	49	49	40	54	in EWC
Chr 3	69231160	T	G	SNV	0	0.5	0	0	0	62	40	29	32	35	in EWC
Chr 3	70042347	T	G	SNV	0	0	0.59375	0	0	79	39	32	32	35	in EWC
Chr 3	70135353	A	C	SNV	0	0	0	0.487805	0.0285714	110	36	31	41	35	in EWC
Chr 3	70433819	T	A	SNV	0	0.666667	0	0	0	108	30	32	30	29	in EWC
Chr 3	71023998	T	G	SNV	0	0	0.652174	0	0	93	25	23	36	33	in EWC
Chr 3	71193830	T	C	SNV	0	0	0	0.5	0	113	25	35	38	44	in EWC
Chr 3	71327858	A	C	SNV	0	0	0	0.444444	0	102	33	34	27	33	in EWC
Chr 3	71677130	C	G	SNV	0	0	0	0.458333	0	101	26	32	24	45	in EWC
Chr 3	72540786	G	A	SNV	0	0	0.588235	0	0	78	20	34	38	28	in EWC
Chr 3	72776980	T	G	SNV	0	0.518519	0	0	0	114	27	36	29	35	in EWC
Chr 3	73293802	G	T	SNV	0	0	0.0344828	0	0.675676	106	35	29	35	37	in EWC
Chr 3	73925205	A	C	SNV	0	0	0	0.571429	0	108	33	35	35	25	in EWC
Chr 3	74013764	A	G	SNV	0	0	0	0	0.636364	99	38	31	35	33	in EWC
Chr 3	74228933	T	C	SNV	0	0	0.513514	0	0	78	19	37	45	32	in EWC
Chr 3	74322374	T	C	SNV	0	0	0	0.538462	0	127	42	31	26	37	in EWC
Chr 3	74678179	C	G	SNV	0	0	0	0.454545	0	131	27	33	22	35	in EWC
Chr 3	75389034	T	G	SNV	0	0.444444	0	0	0	82	27	35	39	36	in EWC
Chr 3	75751144	G	C	SNV	0	0	0	0	0.552632	82	39	25	43	38	in EWC
Chr 3	76147661	A	T	SNV	0	0	0.595238	0	0	96	28	42	35	41	in EWC
Chr 3	78812693	A	G	SNV	0	0	0.6	0	0	107	36	35	34	33	in EWC
Chr 3	80206419	T	G	SNV	0	0.586207	0.03125	0	0	74	29	32	43	29	in EWC
Chr 3	82271140	A	C	SNV	0	0	0	0.566667	0	93	35	33	30	30	in EWC
Chr 3	87454902	A	G	SNV	0	0.5	0	0	0	101	24	43	38	38	in EWC
Chr 3	88502376	A	C	SNV	0	0.576923	0	0	0	78	52	48	55	52	in EWC
Chr 3	89074575	T	C	SNV	0	0.4	0	0	0	67	40	40	54	40	in EWC
Chr 3	89121510	T	C	SNV	0	0.557692	0	0	0	100	52	50	44	65	in EWC
Chr 3	89214737	T	A	SNV	0	0	0	0.621622	0	62	49	47	37	36	in EWC
Chr 3	89824371	A	T	SNV	0	0.487179	0	0	0	94	39	50	51	64	in EWC
Chr 3	90715827	T	C	SNV	0	0	0	0.512195	0	67	41	40	41	40	in EWC
Chr 3	91059145	T	A	SNV	0	0.475	0	0	0	118	40	43	49	48	in EWC
Chr 3	92722223	A	C	SNV	0	0	0	0.4	0	116	34	39	35	31	in EWC
Chr 3	92957207	A	G	SNV	0	0.433333	0	0	0	83	30	34	37	54	in EWC
Chr 3	93253946	T	C	SNV	0	0	0.511628	0	0	117	42	43	34	39	in EWC
Chr 3	93646527	T	C	SNV	0	0	0	0	0.535714	92	33	37	34	56	in EWC
Chr 3	94425422	T	G	SNV	0	0	0	0	0.555556	91	42	54	52	54	in EWC
Chr 3	95422256	T	C	SNV	0	0.622951	0	0	0	107	61	58	48	43	in EWC
Chr 3	96939267	C	T	SNV	0	0	0	0.512195	0	87	38	46	41	42	in EWC
Chr 3	97433028	T	G	SNV	0	0	0	0.410256	0	106	45	29	39	44	in EWC
Chr 3	98946833	T	G	SNV	0	0	0	0	0.606061	101	33	47	42	33	in EWC
Chr 3	101403116	A	C	SNV	0	0.472222	0	0	0	103	36	30	38	32	in EWC
Chr 3	102802756	T	G	SNV	0	0	0	0	0.457143	55	35	30	47	35	in EWC
Chr 3	105131632	T	A	SNV	0	0.483871	0	0.027027	0	81	31	33	37	31	in EWC
Chr 3	105479992	A	C	SNV	0	0	0	0.514286	0	101	38	34	35	42	in EWC
Chr 3	107151861	A	C	SNV	0	0.5	0.0243902	0	0	110	36	41	43	40	in EWC
Chr 3	108108481	T	G	SNV	0	0.583333	0	0.0196078	0	123	36	39	51	39	in EWC
Chr 3	108175840	T	G	SNV	0	0.341463	0	0	0	108	41	52	41	49	in EWC
Chr 3	108350173	T	G	SNV	0	0.340909	0	0	0	90	44	41	33	53	in EWC
Chr 3	109364827	T	G	SNV	0	0.485714	0	0	0	87	35	38	30	38	in EWC
Chr 3	110216729	A	C	SNV	0	0	0.641026	0	0	105	42	39	39	39	in EWC
Chr 3	110289705	G	A	SNV	0	0.388889	0	0	0	114	36	23	31	43	in EWC
Chr 3	111322769	G	A	SNV	0	0	0	0	0.588235	102	39	31	42	34	in EWC
Chr 3	112588356	T	G	SNV	0	0.0357143	0	0.482759	0	89	28	35	29	31	in EWC
Chr 3	112832121	T	A	SNV	0	0.40625	0	0	0	114	32	40	32	42	in EWC
Chr 3	114096915	C	A	SNV	0	0.481481	0	0	0	82	27	42	41	33	in EWC
Chr 3	117041322	C	A	SNV	0	0	0	0	0.434783	115	51	40	41	46	in EWC
Chr 3	117218491	A	G	SNV	0	0	0	0	0.428571	114	34	46	52	42	in EWC
Chr 3	117655455	T	A	SNV	0	0	0	0.372093	0	110	41	43	43	46	in EWC
Chr 3	118435650	G	A	SNV	0	0	0	0.541667	0	76	25	28	24	28	in EWC
Chr 3	118569456	A	G	SNV	0	0	0	0.628571	0	78	32	38	35	34	in EWC
Chr 3	118570459	C	T	SNV	0	0.545455	0	0	0	85	22	38	30	30	in EWC
Chr 3	118802796	A	C	SNV	0	0	0.666667	0	0	98	28	30	24	30	in EWC
Chr 3	118951921	T	C	SNV	0	0	0	0	0.59375	78	30	33	31	32	in EWC
Chr 3	119397441	A	G	SNV	0	0	0	0.513514	0	89	35	24	37	43	in EWC
Chr 3	123108057	C	A	SNV	0	0.418605	0	0	0	129	43	47	45	41	in EWC
Chr 3	124584245	A	T	SNV	0	0	0	0.535714	0	102	28	36	28	39	in EWC
Chr 3	128087039	G	A	SNV	0	0	0.4	0	0	81	41	35	45	38	in EWC
Chr 3	128103193	A	C	SNV	0	0	0.583333	0	0	94	37	48	43	38	in EWC
Chr 3	128115990	A	C	SNV	0	0	0	0.581818	0	99	36	45	55	30	in EWC
Chr 3	128988244	C	T	SNV	0	0	0	0.555556	0	120	31	20	45	35	in EWC
Chr 3	129701691	A	G	SNV	0	0	0	0	0.613636	107	49	41	38	44	in EWC
Chr 3	130520297	G	A	SNV	0	0	0	0.52381	0	68	33	31	42	23	in EWC
Chr 3	134639621	C	T	SNV	0	0	0	0	0.434783	83	33	36	27	23	in EWC
Chr 3	134792768	T	C	SNV	0	0	0.571429	0	0	79	31	21	26	26	in EWC
Chr 3	134967415	A	G	SNV	0	0	0.487805	0	0	110	27	41	41	40	in EWC
Chr 3	137725677	T	G	SNV	0	0.5	0	0	0	97	52	49	39	32	in EWC
Chr 3	138080018	T	G	SNV	0	0.395833	0	0	0	112	48	36	56	43	in EWC
Chr 3	138363599	A	C	SNV	0	0	0	0.627907	0	106	38	34	43	46	in EWC
Chr 3	138367653	G	A	SNV	0	0	0.522727	0	0	71	39	44	32	42	in EWC
Chr 3	139824952	T	C	SNV	0	0	0	0	0.571429	96	24	34	41	28	in EWC
Chr 3	140310281	A	G	SNV	0	0	0.388889	0	0	85	40	36	36	26	in EWC
Chr 3	140553983	G	A	SNV	0	0	0	0	0.472222	123	30	29	31	36	in EWC
Chr 3	141111548	A	G	SNV	0.0116279	0.5	0	0	0	86	38	31	36	39	in EWC
Chr 3	141172717	G	A	SNV	0	0	0	0	0.55102	117	29	37	31	49	in EWC
Chr 3	141334841	G	A	SNV	0	0	0	0.609756	0	107	26	41	41	47	in EWC
Chr 3	141579488	G	A	SNV	0	0	0.451613	0	0	104	33	31	34	37	in EWC
Chr 3	141633504	A	G	SNV	0	0	0.44	0	0	97	35	25	36	42	in EWC
Chr 3	141814652	T	C	SNV	0	0	0	0	0.630435	118	32	31	44	46	in EWC
Chr 3	142209505	T	G	SNV	0	0	0	0.578947	0	122	43	38	57	49	in EWC
Chr 3	142278454	G	A	SNV	0	0	0	0	0.568182	131	37	37	38	44	in EWC
Chr 3	143094085	A	C	SNV	0	0	0.464286	0	0	121	39	28	48	32	in EWC
Chr 3	145391743	A	C	SNV	0	0	0	0	0.409091	128	28	37	51	44	in EWC
Chr 3	145561249	C	T	SNV	0	0.442308	0	0	0	77	52	53	51	58	in EWC
Chr 3	145837235	A	G	SNV	0	0	0	0.529412	0	107	41	40	34	43	in EWC
Chr 3	146916746	T	C	SNV	0	0	0	0.575758	0	68	39	35	33	32	in EWC
Chr 3	147120883	G	T	SNV	0	0	0	0.448276	0	98	39	42	29	28	in EWC
Chr 3	147197232	T	G	SNV	0	0	0	0.534884	0	94	37	32	43	36	in EWC
Chr 3	147618932	T	G	SNV	0	0	0	0.52	0	68	30	26	25	37	in EWC
Chr 3	147813212	A	G	SNV	0	0	0	0	0.367347	112	29	33	20	49	in EWC
Chr 3	148032530	G	A	SNV	0	0	0	0	0.433333	79	17	39	35	30	in EWC
Chr 3	149059936	T	C	SNV	0	0.0238095	0	0.6	0.0217391	70	42	32	35	46	in EWC
Chr 3	150253102	T	C	SNV	0	0	0	0.53125	0	101	34	29	32	25	in EWC
Chr 3	150529800	C	A	SNV	0.123077	0	0	0.555556	0	130	31	36	45	33	in EWC	MosJ 4	0.122137	0.133882	0.00192678	0	0.472277	0
Chr 3	150688030	T	A	SNV	0	0	0.576923	0	0	109	31	26	23	28	in EWC
Chr 3	152698773	T	C	SNV	0	0	0	0.585366	0	104	39	29	41	40	in EWC
Chr 3	154021879	T	G	SNV	0	0	0	0.487805	0	89	31	47	41	45	in EWC
Chr 3	154038410	A	G	SNV	0	0.509804	0	0	0	93	51	37	63	46	in EWC
Chr 3	154724736	A	T	SNV	0	0	0.708333	0	0	72	41	24	28	42	in EWC
Chr 3	155242114	A	G	SNV	0	0	0.4	0	0	73	36	35	30	42	in EWC
Chr 3	155467939	A	G	SNV	0	0.37931	0	0	0	117	29	31	29	37	in EWC
Chr 3	155794823	A	C	SNV	0	0	0	0.451613	0	81	23	23	31	23	in EWC
Chr 3	156094012	A	G	SNV	0	0.657143	0	0	0	109	35	28	24	38	in EWC
Chr 3	156813786	T	C	SNV	0	0	0	0	0.527778	114	32	29	40	36	in EWC
Chr 3	157147128	C	A	SNV	0	0	0.585366	0	0	91	33	41	37	45	in EWC
Chr 3	157542251	G	A	SNV	0.0887097	0	0.545455	0	0	124	43	33	43	59	in EWC	MosJ 5	0.0806452	0.0426929	0.000843882	0.491335	0.000573394	0.00123001
Chr 3	157925816	A	G	SNV	0	0.604167	0	0	0	68	48	27	51	45	in EWC
Chr 3	158384087	A	C	SNV	0	0	0.48	0	0	96	35	50	35	44	in EWC
Chr 4	8029356	A	G	SNV	0	0	0.416667	0	0	87	30	24	16	30	in EWC
Chr 4	8341434	A	G	SNV	0	0	0	0.54717	0	98	48	37	53	50	in EWC
Chr 4	10362687	A	C	SNV	0	0	0.392857	0	0	50	25	28	49	31	in EWC
Chr 4	10560711	T	C	SNV	0	0	0.604651	0.0222222	0	118	44	43	45	53	in EWC
Chr 4	10720233	A	G	SNV	0	0	0	0.5	0	90	35	39	36	59	in EWC
Chr 4	11795489	C	G	SNV	0	0	0	0	0.488889	108	43	44	36	45	in EWC
Chr 4	14284160	G	T	SNV	0	0	0	0.457143	0	85	32	41	35	39	in EWC
Chr 4	15888390	A	G	SNV	0	0	0	0.652174	0	99	34	42	23	36	in EWC
Chr 4	16790400	T	C	SNV	0	0	0	0	0.372093	106	32	29	30	43	in EWC
Chr 4	17157453	G	C	SNV	0	0	0	0.4	0	42	19	17	20	34	in EWC
Chr 4	17180763	T	G	SNV	0	0	0	0.541667	0	97	32	27	24	28	in EWC
Chr 4	17419090	T	G	SNV	0	0	0.516129	0	0	95	34	31	32	31	in EWC
Chr 4	17947490	T	C	SNV	0	0	0	0	0.414634	104	31	36	26	41	in EWC
Chr 4	18030813	G	A	SNV	0	0.46875	0	0	0	126	32	27	32	36	in EWC
Chr 4	18472691	A	C	SNV	0	0	0.422222	0	0	90	41	45	51	32	in EWC
Chr 4	18678762	T	G	SNV	0	0	0	0.521739	0	127	41	42	46	41	in EWC
Chr 4	18752680	A	G	SNV	0	0	0	0.5	0	104	38	33	34	38	in EWC
Chr 4	18965245	T	A	SNV	0	0	0	0.631579	0	99	32	31	19	34	in EWC
Chr 4	19009156	A	C	SNV	0	0	0	0.512821	0	82	32	44	39	33	in EWC
Chr 4	19720891	T	A	SNV	0	0.575758	0	0	0	87	33	41	49	36	in EWC
Chr 4	20314657	A	G	SNV	0	0	0	0	0.514286	128	25	24	42	35	in EWC
Chr 4	20470098	A	C	SNV	0	0	0	0.548387	0	103	25	36	31	21	in EWC
Chr 4	21907992	T	G	SNV	0	0.509091	0	0	0.0166667	121	55	38	56	60	in EWC
Chr 4	21932258	C	T	SNV	0	0	0	0.413043	0	116	52	44	46	41	in EWC
Chr 4	22654859	A	G	SNV	0	0	0	0	0.513514	57	32	29	34	37	in EWC
Chr 4	23636072	C	T	SNV	0	0	0	0	0.529412	101	31	33	35	34	in EWC
Chr 4	25587214	A	C	SNV	0	0	0	0.513514	0	107	31	38	37	37	in EWC
Chr 4	26665135	A	T	SNV	0	0	0	0.645161	0	89	28	31	31	26	in EWC
Chr 4	27380546	C	T	SNV	0	0	0.545455	0	0	88	32	33	28	28	in EWC
Chr 4	27956784	A	G	SNV	0	0	0.461538	0	0	108	34	39	35	31	in EWC
Chr 4	28199329	A	C	SNV	0	0	0	0.464286	0	97	31	39	28	34	in EWC
Chr 4	28401399	T	A	SNV	0	0	0	0.605263	0	65	31	31	38	33	in EWC
Chr 4	29491906	T	G	SNV	0	0	0	0.5	0	127	35	34	32	30	in EWC
Chr 4	29936683	C	A	SNV	0	0.428571	0	0	0	84	28	34	24	23	in EWC
Chr 4	30383379	T	G	SNV	0	0	0	0	0.625	87	16	34	34	32	in EWC
Chr 4	33410578	T	C	SNV	0	0	0	0.454545	0	87	41	36	44	53	in EWC
Chr 4	33844475	A	C	SNV	0	0	0	0.484848	0	78	33	36	33	27	in EWC
Chr 4	34236480	C	T	SNV	0	0.414634	0	0	0	84	41	38	30	49	in EWC
Chr 4	35417332	T	C	SNV	0	0	0	0.609756	0	109	48	46	41	50	in EWC
Chr 4	35946612	T	G	SNV	0	0	0	0	0.464286	94	29	27	33	28	in EWC
Chr 4	36325690	A	G	SNV	0	0	0	0.580645	0	88	26	34	31	35	in EWC
Chr 4	36493707	T	G	SNV	0	0.484848	0	0	0	104	33	35	30	35	in EWC
Chr 4	36625889	A	C	SNV	0	0	0	0.525	0	118	28	31	40	27	in EWC
Chr 4	36943487	A	C	SNV	0	0	0	0.481481	0	114	20	22	27	34	in EWC
Chr 4	37354690	G	A	SNV	0	0	0	0.354839	0	116	30	36	31	38	in EWC
Chr 4	37380523	C	G	SNV	0	0	0	0	0.625	101	25	23	29	32	in EWC
Chr 4	38799070	A	T	SNV	0	0	0	0.435897	0	93	28	35	39	21	in EWC
Chr 4	39615656	A	G	SNV	0	0.565217	0	0	0	103	23	41	37	39	in EWC
Chr 4	40555001	A	C	SNV	0	0	0	0.478261	0	68	46	49	46	32	in EWC
Chr 4	44782035	C	G	SNV	0	0	0.441176	0	0	121	42	34	44	44	in EWC
Chr 4	45287120	T	C	SNV	0	0.609756	0	0	0	68	41	33	52	46	in EWC
Chr 4	47325388	T	G	SNV	0	0.536585	0	0	0	86	41	31	44	35	in EWC
Chr 4	47366314	C	T	SNV	0	0.0208333	0	0	0.37037	97	48	31	31	27	in EWC
Chr 4	48059078	AATTGC	A	INDEL	0	0	0	0	0.404762	100	44	43	43	42	in EWC
Chr 4	49122828	G	A	SNV	0	0	0	0	0.446809	74	40	39	29	47	in EWC
Chr 4	49959584	G	T	SNV	0	0.517241	0	0	0	77	29	49	35	34	in EWC
Chr 4	50144167	A	C	SNV	0	0	0	0.461538	0	108	47	24	39	43	in EWC
Chr 4	50337527	T	G	SNV	0	0	0	0.521739	0	95	26	23	23	36	in EWC
Chr 4	51228143	A	G	SNV	0	0.516129	0	0	0	103	31	25	33	40	in EWC
Chr 4	51637388	T	A	SNV	0	0	0.5	0	0	90	31	44	35	38	in EWC
Chr 4	51637730	G	A	SNV	0	0	0	0.5	0	106	26	40	34	38	in EWC
Chr 4	51797226	T	C	SNV	0	0	0.533333	0	0	119	45	30	43	37	in EWC
Chr 4	52041042	T	A	SNV	0	0	0	0	0.418605	101	54	31	37	43	in EWC
Chr 4	53432933	T	C	SNV	0	0	0	0	0.534884	90	35	41	45	43	in EWC
Chr 4	54899620	G	C	SNV	0	0	0	0	0.509804	76	52	60	48	51	in EWC
Chr 4	55789594	T	G	SNV	0	0.0285714	0	0.444444	0	75	35	45	45	33	in EWC
Chr 4	58199326	G	C	SNV	0	0	0.547619	0	0	110	37	42	40	36	in EWC
Chr 4	63344230	T	C	SNV	0	0.612903	0	0	0	93	31	39	36	29	in EWC
Chr 4	63851471	C	T	SNV	0	0.434783	0	0	0	113	23	27	35	45	in EWC
Chr 4	64006376	T	G	SNV	0	0	0	0.558824	0	89	30	38	34	35	in EWC
Chr 4	65668616	C	G	SNV	0	0	0.558824	0	0	74	25	34	20	33	in EWC
Chr 4	67470463	T	G	SNV	0	0	0	0.62963	0	105	31	28	27	25	in EWC
Chr 4	68248085	T	G	SNV	0	0	0	0.6	0	94	25	39	45	38	in EWC
Chr 4	68949920	A	T	SNV	0	0	0	0.5	0	117	24	41	34	34	in EWC
Chr 4	69845983	T	A	SNV	0	0	0	0	0.488372	86	36	39	33	43	in EWC
Chr 4	70091686	A	G	SNV	0	0	0	0.538462	0	104	40	32	26	34	in EWC
Chr 4	72674601	C	A	SNV	0	0.342857	0.0344828	0	0	94	35	29	31	27	in EWC
Chr 4	72718474	T	G	SNV	0	0	0.025	0.527778	0	87	37	40	36	32	in EWC
Chr 4	73494456	A	T	SNV	0	0	0	0.571429	0	84	40	36	28	35	in EWC
Chr 4	74589270	T	C	SNV	0	0	0.541667	0	0	83	37	48	41	42	in EWC
Chr 4	74736771	A	G	SNV	0	0	0	0	0.382353	68	30	26	44	34	in EWC
Chr 4	74795851	T	G	SNV	0	0	0	0	0.465116	80	32	27	28	43	in EWC
Chr 4	74896341	A	G	SNV	0	0	0	0.451613	0	71	25	20	31	45	in EWC
Chr 4	75095347	A	G	SNV	0	0	0	0.5	0	84	31	29	32	55	in EWC
Chr 4	75818532	A	C	SNV	0	0	0	0	0.5	87	44	26	49	32	in EWC
Chr 4	76423242	T	G	SNV	0	0	0	0	0.515152	116	33	39	38	33	in EWC
Chr 4	76599562	ATTTGT	ATTGG	Multisite	0	0	0	0.382353	0	112	31	42	34	30	in EWC
Chr 4	76816731	A	G	SNV	0	0	0	0.552632	0	90	33	40	38	35	in EWC
Chr 4	76860302	C	A	SNV	0	0	0	0.625	0	52	26	31	24	35	in EWC
Chr 4	78693411	A	T	SNV	0	0	0.0384615	0.514286	0.0238095	111	25	26	35	42	in EWC
Chr 4	78989675	A	C	SNV	0	0.0344828	0	0.605263	0	94	29	34	38	34	in EWC
Chr 4	79792755	A	T	SNV	0	0.0285714	0	0	0.470588	92	35	20	30	34	in EWC
Chr 4	81168718	T	C	SNV	0	0	0	0.634146	0	85	40	33	41	40	in EWC
Chr 4	81396476	G	C	SNV	0	0	0	0.351351	0	59	40	31	37	22	in EWC
Chr 4	81659643	C	T	SNV	0	0	0	0.4	0	93	35	39	35	36	in EWC
Chr 4	82030975	T	G	SNV	0	0	0	0	0.387755	92	46	39	41	49	in EWC
Chr 4	84126464	GGGGAA	G	INDEL	0	0	0.692308	0	0	100	37	39	46	43	in EWC
Chr 4	84502187	T	C	SNV	0	0.55	0	0	0	109	40	36	44	49	in EWC
Chr 4	86201733	G	A	SNV	0	0.547619	0	0	0	85	42	51	36	51	in EWC
Chr 4	86343987	A	C	SNV	0	0.0277778	0	0.545455	0	107	36	37	33	37	in EWC
Chr 4	86400511	A	C	SNV	0	0	0	0.538462	0	103	46	34	39	30	in EWC
Chr 4	88072227	T	A	SNV	0	0.466667	0	0	0	96	30	41	43	36	in EWC
Chr 4	89195589	G	A	SNV	0	0	0.511628	0	0	114	39	43	47	42	in EWC
Chr 4	90138741	T	G	SNV	0	0.592593	0	0	0	116	27	31	28	39	in EWC
Chr 4	90249641	A	C	SNV	0.0147059	0	0	0	0.4	68	23	26	20	20	in EWC
Chr 4	90251773	T	A	SNV	0	0	0	0.459459	0	115	33	27	37	33	in EWC
Chr 4	91107422	A	C	SNV	0	0	0	0.6	0	81	30	30	30	45	in EWC
Chr 4	91666221	A	G	SNV	0	0.5	0	0	0	107	30	28	36	35	in EWC
Chr 4	92776509	G	C	SNV	0	0.576923	0	0	0	85	26	37	24	32	in EWC
Chr 4	93049731	A	T	SNV	0	0	0.46875	0	0	122	34	32	30	47	in EWC
Chr 4	93165381	T	C	SNV	0	0	0.583333	0	0	91	36	36	25	39	in EWC
Chr 4	95088620	A	T	SNV	0	0	0	0.589744	0	111	47	47	39	46	in EWC
Chr 4	95925342	G	T	SNV	0	0	0	0.409091	0	90	31	31	44	40	in EWC
Chr 4	96294986	T	C	SNV	0	0	0	0.633333	0	118	34	22	30	37	in EWC
Chr 4	96825634	T	G	SNV	0	0	0	0.451613	0	79	27	32	31	35	in EWC
Chr 4	98795940	C	T	SNV	0	0	0	0.542857	0	109	36	42	35	36	in EWC
Chr 4	99323851	C	T	SNV	0	0	0	0.425	0	81	32	54	40	45	in EWC
Chr 4	99455583	A	C	SNV	0	0	0	0.625	0	89	40	41	48	51	in EWC
Chr 4	100144161	T	C	SNV	0	0	0	0.444444	0	75	33	31	45	39	in EWC
Chr 4	100281059	T	G	SNV	0	0	0	0	0.571429	96	38	36	40	42	in EWC
Chr 4	101026675	G	T	SNV	0	0	0	0.357143	0	84	30	31	28	38	in EWC
Chr 4	101209954	T	G	SNV	0	0.509804	0	0	0	127	51	65	37	42	in EWC
Chr 4	101883380	A	G	SNV	0	0.44898	0	0	0	95	49	40	28	52	in EWC
Chr 4	102377221	C	A	SNV	0.010989	0	0	0	0.516129	91	37	41	24	31	in EWC
Chr 4	102426459	A	G	SNV	0	0	0	0.390244	0	126	41	27	41	37	in EWC
Chr 4	103651260	T	A	SNV	0	0	0.638889	0	0	100	25	36	26	31	in EWC
Chr 4	104782007	A	T	SNV	0.00970874	0	0	0.592593	0	103	45	36	27	48	in EWC
Chr 4	104793637	T	C	SNV	0.0106383	0	0	0.516129	0	94	41	45	31	44	in EWC
Chr 4	105661275	A	C	SNV	0	0	0.0181818	0	0.473684	102	25	55	33	38	in EWC
Chr 4	106499033	T	A	SNV	0	0	0.516129	0	0	76	31	31	43	47	in EWC
Chr 4	107468727	G	A	SNV	0	0	0	0	0.621622	78	39	44	35	37	in EWC
Chr 4	107500944	T	C	SNV	0	0.673913	0	0	0	75	46	45	27	39	in EWC
Chr 4	107810897	T	A	SNV	0	0.589744	0	0	0	111	39	59	54	32	in EWC
Chr 4	107961816	A	G	SNV	0	0.0243902	0	0.613636	0	87	41	35	44	49	in EWC
Chr 4	110212801	T	G	SNV	0	0	0.633333	0	0	87	39	30	36	53	in EWC
Chr 4	110776302	T	A	SNV	0	0	0.4	0	0	79	31	35	33	44	in EWC
Chr 4	112793817	T	C	SNV	0	0	0.517241	0	0	86	29	29	32	38	in EWC
Chr 4	113742400	T	A	SNV	0	0	0	0.6	0	103	31	36	30	30	in EWC
Chr 4	114838516	C	T	SNV	0	0	0	0	0.447368	63	37	28	34	38	in EWC
Chr 4	114876626	T	A	SNV	0	0	0.655172	0	0	87	22	29	32	39	in EWC
Chr 4	115039628	TC	T	INDEL	0.207921	0.552632	0.413043	0	0.522727	101	38	46	46	44	in EWC	MosJ 37	0.207921	0.178727	0.503529	0.490602	0.000708592	0.512281
Chr 4	116050665	G	T	SNV	0.0405405	0	0	0	0.5	74	45	40	40	50	in EWC	MosJ 122		0.112815	0.00224641	0.00186382	0.00136513	0.486863
Chr 4	118902368	T	C	SNV	0	0	0.425926	0	0	54	45	54	38	41	in EWC
Chr 4	121367184	T	G	SNV	0	0.512195	0	0	0	111	41	52	54	32	in EWC
Chr 4	124283067	T	G	SNV	0	0	0.571429	0	0	57	42	42	41	48	in EWC
Chr 4	124499975	C	T	SNV	0	0	0	0	0.517857	98	38	44	59	56	in EWC
Chr 4	124704414	G	C	SNV	0	0.354839	0	0	0	75	31	50	50	52	in EWC
Chr 4	125084862	G	A	SNV	0	0	0.432432	0	0	106	52	37	39	42	in EWC
Chr 4	125813229	A	T	SNV	0	0	0	0	0.414634	76	40	47	41	41	in EWC
Chr 4	126397381	T	A	SNV	0	0	0	0	0.555556	83	65	57	55	63	in EWC
Chr 4	127492665	C	T	SNV	0	0	0.446809	0	0	100	36	47	63	45	in EWC
Chr 4	129279003	T	C	SNV	0	0.5	0	0	0	79	42	47	46	41	in EWC
Chr 4	129729178	A	G	SNV	0	0	0.480769	0	0	72	44	52	44	43	in EWC
Chr 4	129809362	T	C	SNV	0	0.521739	0	0	0	87	46	38	56	40	in EWC
Chr 4	130259404	T	G	SNV	0	0.608696	0	0	0	67	46	38	38	35	in EWC
Chr 4	130703080	C	T	SNV	0	0	0	0	0.490196	73	32	47	43	51	in EWC
Chr 4	131529636	G	T	SNV	0	0.571429	0	0	0	90	42	52	30	37	in EWC
Chr 4	134683542	T	G	SNV	0	0.545455	0	0	0	89	44	45	53	49	in EWC
Chr 4	135142965	T	A	SNV	0	0.452381	0	0	0	121	42	47	44	43	in EWC
Chr 4	136928608	T	C	SNV	0.0133333	0	0	0.35	0	75	45	43	40	39	in EWC
Chr 4	137481355	T	C	SNV	0	0.581395	0	0	0.0204082	106	43	44	49	49	in EWC
Chr 4	139449570	G	A	SNV	0	0	0.436364	0	0	88	39	55	41	40	in EWC
Chr 4	139473498	T	A	SNV	0	0	0	0	0.404255	101	45	58	61	47	in EWC
Chr 4	139874376	T	A	SNV	0	0	0.534884	0	0	85	28	43	49	38	in EWC
Chr 4	140081456	A	T	SNV	0	0	0	0.528302	0	88	41	49	53	45	in EWC
Chr 4	140165435	C	A	SNV	0	0.5	0	0	0	74	28	49	30	45	in EWC
Chr 4	140530661	A	G	SNV	0	0	0	0	0.44	81	25	54	49	50	in EWC
Chr 4	143656424	A	C	SNV	0	0	0	0.477273	0	90	41	41	44	58	in EWC
Chr 4	143690208	T	G	SNV	0	0	0	0.447368	0	95	38	30	38	48	in EWC
Chr 4	143694699	T	C	SNV	0	0	0	0	0.4	95	32	28	32	30	in EWC
Chr 4	143948135	T	A	SNV	0	0	0.5	0	0	94	41	28	48	43	in EWC
Chr 4	148283815	G	T	SNV	0	0	0	0.5	0	111	29	44	42	51	in EWC
Chr 4	153046235	T	G	SNV	0	0	0	0.651163	0	85	44	38	43	55	in EWC
Chr 5	5111200	A	G	SNV	0	0.463415	0	0	0	86	41	30	42	53	in EWC
Chr 5	5821270	A	C	SNV	0	0	0	0.490196	0	85	34	49	51	39	in EWC
Chr 5	6990234	G	A	SNV	0	0	0.513514	0	0	115	28	37	30	37	in EWC
Chr 5	7022710	T	C	SNV	0	0	0	0	0.388889	115	26	34	39	36	in EWC
Chr 5	10252541	T	C	SNV	0	0.441176	0	0	0	83	34	22	33	30	in EWC
Chr 5	10828232	C	T	SNV	0	0	0.59375	0	0	80	31	32	22	33	in EWC
Chr 5	11153932	T	G	SNV	0	0.5	0	0	0.0434783	88	30	30	40	23	in EWC
Chr 5	12054790	A	G	SNV	0	0	0	0	0.608696	93	25	33	24	46	in EWC
Chr 5	12145474	T	A	SNV	0	0.5	0	0	0	62	32	36	28	35	in EWC
Chr 5	12411537	T	G	SNV	0	0.518519	0	0	0	110	27	41	36	38	in EWC
Chr 5	12758903	G	T	SNV	0	0	0	0.4	0	117	45	41	50	48	in EWC
Chr 5	13021661	T	G	SNV	0	0	0	0.408163	0	117	36	47	49	41	in EWC
Chr 5	13125320	T	C	SNV	0	0	0	0	0.342857	81	28	27	25	35	in EWC
Chr 5	13263579	CT	C	INDEL	0	0	0	0	0.478261	100	35	50	45	46	in EWC
Chr 5	13657592	A	G	SNV	0	0	0	0.0263158	0.34375	92	32	30	38	32	in EWC
Chr 5	14348314	A	G	SNV	0	0	0	0.625	0	113	29	30	40	38	in EWC
Chr 5	17235850	A	C	SNV	0	0	0	0.486486	0	76	40	31	37	45	in EWC
Chr 5	18202700	A	T	SNV	0	0.447368	0	0	0	103	38	26	25	49	in EWC
Chr 5	18599356	G	C	SNV	0	0	0	0	0.473684	94	38	39	37	38	in EWC
Chr 5	19340787	A	C	SNV	0	0.5	0	0	0	137	26	37	39	50	in EWC
Chr 5	23068445	T	G	SNV	0	0	0	0.511628	0	117	43	41	43	57	in EWC
Chr 5	23615894	T	A	SNV	0	0.581395	0	0	0	79	43	54	52	50	in EWC
Chr 5	23896710	A	T	SNV	0	0	0.516129	0	0	110	49	62	43	57	in EWC
Chr 5	24316284	A	T	SNV	0	0.489796	0	0	0	98	49	60	53	57	in EWC
Chr 5	25452510	A	G	SNV	0.238095	0	0	0.5	0	105	49	42	46	49	in EWC	MosJ 7	0.240741	0.134648	0.00241838	0.00134318	0.512961	0.00158898
Chr 5	26603643	C	A	SNV	0	0.447368	0	0	0	87	38	45	30	45	in EWC
Chr 5	28023801	T	C	SNV	0	0.53125	0	0	0	81	32	49	35	46	in EWC
Chr 5	28640055	A	C	SNV	0	0	0	0	0.481481	89	36	40	38	54	in EWC
Chr 5	28649804	T	G	SNV	0	0	0.0222222	0.428571	0	106	34	45	42	35	in EWC
Chr 5	30475582	A	C	SNV	0	0.459459	0	0	0	93	37	42	38	35	in EWC
Chr 5	30508703	T	G	SNV	0	0	0	0.390244	0	96	37	46	41	32	in EWC
Chr 5	35188521	T	G	SNV	0	0.568627	0	0.0232558	0	90	51	40	43	40	in EWC
Chr 5	36339527	A	T	SNV	0	0.425	0	0	0	87	40	45	38	40	in EWC
Chr 5	37613792	C	T	SNV	0	0	0	0.52	0	90	31	50	50	45	in EWC
Chr 5	39417091	T	G	SNV	0	0	0	0.615385	0	114	31	30	39	37	in EWC
Chr 5	39431816	T	A	SNV	0	0	0	0	0.344828	83	30	33	31	29	in EWC
Chr 5	39894711	T	C	SNV	0	0	0.560976	0	0	136	24	41	42	34	in EWC
Chr 5	42047484	T	G	SNV	0	0	0	0	0.48	80	28	22	23	25	in EWC
Chr 5	42134662	A	C	SNV	0	0.666667	0	0	0	98	24	28	35	30	in EWC
Chr 5	42545286	A	G	SNV	0	0.481481	0	0	0	71	27	31	29	36	in EWC
Chr 5	45484022	C	T	SNV	0	0.611111	0	0	0	120	36	33	34	45	in EWC
Chr 5	45562413	A	G	SNV	0	0	0.512821	0	0	107	37	39	34	43	in EWC
Chr 5	47903000	T	C	SNV	0	0	0	0.48	0	99	34	31	25	25	in EWC
Chr 5	47948360	CG	C	INDEL	0	0	0	0.583333	0	98	34	38	24	35	in EWC
Chr 5	49014186	G	A	SNV	0	0	0	0	0.5	123	31	32	32	32	in EWC
Chr 5	49377979	A	C	SNV	0	0	0.609756	0	0	107	49	41	33	40	in EWC
Chr 5	50619494	A	G	SNV	0	0.47619	0	0	0	124	21	30	30	34	in EWC
Chr 5	51359046	G	A	SNV	0	0.441176	0	0	0	87	34	29	36	48	in EWC
Chr 5	53830470	T	A	SNV	0	0	0	0.6	0	64	41	50	45	39	in EWC
Chr 5	53927311	G	T	SNV	0	0.514286	0	0	0	84	35	46	44	33	in EWC
Chr 5	55269038	T	G	SNV	0	0	0	0	0.566667	106	30	31	44	30	in EWC
Chr 5	55284072	C	T	SNV	0	0	0	0.7	0	109	29	36	20	37	in EWC
Chr 5	55517070	T	G	SNV	0	0	0	0	0.540541	87	33	27	31	37	in EWC
Chr 5	55804433	A	G	SNV	0	0	0	0.609756	0	97	36	45	41	34	in EWC
Chr 5	56065326	T	C	SNV	0	0	0.416667	0	0	80	23	24	27	33	in EWC
Chr 5	56522157	A	C	SNV	0	0	0.464286	0	0	124	29	28	27	37	in EWC
Chr 5	57520799	T	A	SNV	0.00961538	0	0	0	0.571429	104	29	29	30	28	in EWC	MosJ 94		0.0139116	0.000223895	0.00028026	0.000214387	0.488485
Chr 5	57963388	A	C	SNV	0	0	0	0	0.413793	72	24	28	35	29	in EWC
Chr 5	58263268	G	A	SNV	0	0	0.461538	0	0	82	30	26	29	27	in EWC
Chr 5	58371991	A	C	SNV	0	0	0	0	0.625	91	36	34	29	32	in EWC
Chr 5	58692994	G	T	SNV	0	0	0.378378	0	0	117	28	37	34	37	in EWC
Chr 5	58839563	A	T	SNV	0	0	0.571429	0.0294118	0	111	26	21	34	25	in EWC
Chr 5	58910052	T	C	SNV	0	0	0	0	0.513514	94	35	36	42	37	in EWC
Chr 5	59163405	T	C	SNV	0	0	0.030303	0.5	0	123	33	33	30	33	in EWC
Chr 5	59164220	C	T	SNV	0	0	0	0.357143	0	86	26	38	28	34	in EWC
Chr 5	59383071	A	C	SNV	0	0	0	0.516129	0	106	32	30	31	42	in EWC
Chr 5	59947755	C	A	SNV	0	0	0	0	0.55814	75	34	44	30	43	in EWC
Chr 5	61019770	A	C	SNV	0	0	0	0.65625	0	69	33	37	32	34	in EWC
Chr 5	61696521	G	C	SNV	0.288462	0	0	0.576923	0	104	26	30	26	34	in EWC	MosJ 9	0.288462	0.146552	0.000347102	0	0.493158	0.000260281
Chr 5	61852641	A	T	SNV	0	0	0	0	0.470588	105	25	32	39	34	in EWC
Chr 5	62446189	A	C	SNV	0	0	0	0.407407	0	70	25	31	27	23	in EWC
Chr 5	62480445	A	G	SNV	0	0	0.527778	0	0	82	32	36	33	42	in EWC
Chr 5	62601879	C	T	SNV	0	0	0.44	0	0	131	28	25	33	31	in EWC
Chr 5	63208371	T	C	SNV	0	0	0	0.414634	0	87	40	27	41	30	in EWC
Chr 5	63297294	T	A	SNV	0	0	0	0.372093	0	116	25	21	43	42	in EWC
Chr 5	66883590	T	G	SNV	0	0	0	0.0188679	0.6	104	49	40	53	40	in EWC
Chr 5	67193672	A	C	SNV	0	0	0	0	0.555556	88	39	36	37	27	in EWC
Chr 5	69989674	T	C	SNV	0	0	0	0.457143	0	101	24	37	35	31	in EWC
Chr 5	70108372	A	G	SNV	0	0.481481	0	0	0	136	27	26	32	31	in EWC
Chr 5	70556702	A	T	SNV	0	0	0	0.529412	0	56	30	21	34	21	in EWC
Chr 5	73537679	G	A	SNV	0	0	0.435897	0	0	95	36	39	38	39	in EWC
Chr 5	74580337	T	C	SNV	0	0	0	0	0.545455	119	42	53	39	55	in EWC
Chr 5	74871724	T	C	SNV	0	0	0	0.470588	0	75	33	31	34	43	in EWC
Chr 5	75453447	A	G	SNV	0	0.583333	0	0	0	81	36	60	42	52	in EWC
Chr 5	78924171	T	G	SNV	0	0	0	0	0.6	101	31	41	38	30	in EWC
Chr 5	79785900	C	A	SNV	0	0.4	0	0	0	58	20	26	24	37	in EWC
Chr 5	80181943	T	C	SNV	0	0	0	0.439024	0	106	32	48	41	31	in EWC
Chr 5	80421131	A	C	SNV	0	0.514286	0	0	0	89	35	26	31	31	in EWC
Chr 5	80673241	T	G	SNV	0	0	0	0.545455	0	95	33	25	22	26	in EWC
Chr 5	80744765	A	T	SNV	0	0.64	0	0.03125	0	88	25	29	32	38	in EWC
Chr 5	81090433	A	G	SNV	0	0	0	0.393939	0	122	26	33	33	42	in EWC
Chr 5	82005365	T	G	SNV	0	0	0	0	0.631579	126	38	27	36	38	in EWC
Chr 5	82997871	G	T	SNV	0	0	0.5	0	0	114	25	26	28	36	in EWC
Chr 5	83448422	T	G	SNV	0	0	0	0	0.555556	89	18	29	34	27	in EWC
Chr 5	83997799	A	C	SNV	0	0	0	0	0.407407	88	23	37	27	27	in EWC
Chr 5	84556158	G	T	SNV	0	0.642857	0	0	0	89	28	32	35	39	in EWC
Chr 5	85400674	G	A	SNV	0	0.5	0	0	0	94	24	30	33	32	in EWC
Chr 5	86098240	GTAAGTACTACTCAAC	G	INDEL	0	0	0	0	0.404255	85	39	46	44	47	in EWC
Chr 5	89856118	G	A	SNV	0	0	0	0	0.441176	94	27	39	28	34	in EWC
Chr 5	90767633	C	T	SNV	0	0	0.514286	0	0	98	33	35	45	39	in EWC
Chr 5	91613824	A	G	SNV	0	0	0.0285714	0.340909	0	92	35	35	44	26	in EWC
Chr 5	91784158	C	T	SNV	0	0.477273	0	0	0	86	44	34	38	53	in EWC
Chr 5	93280851	T	G	SNV	0	0	0	0.625	0	109	37	39	48	35	in EWC
Chr 5	98212913	T	G	SNV	0	0.424242	0	0	0	94	33	38	36	42	in EWC
Chr 5	98702351	C	T	SNV	0	0	0	0	0.540541	115	33	23	33	37	in EWC
Chr 5	98887146	A	G	SNV	0	0	0	0.522727	0	101	40	34	44	40	in EWC
Chr 5	99269638	C	T	SNV	0	0	0	0	0.52381	115	27	30	31	42	in EWC
Chr 5	99742111	A	T	SNV	0	0	0.608696	0	0	89	38	46	22	39	in EWC
Chr 5	100687732	T	C	SNV	0	0.451613	0	0	0	100	31	40	42	42	in EWC
Chr 5	102585208	A	C	SNV	0	0	0	0.56	0	110	45	46	50	41	in EWC
Chr 5	102706047	A	G	SNV	0	0	0	0.484848	0	95	37	48	33	47	in EWC
Chr 5	104222084	T	G	SNV	0	0	0	0	0.469388	103	31	41	29	49	in EWC
Chr 5	106154039	T	C	SNV	0	0	0	0.594595	0	101	40	40	37	43	in EWC
Chr 5	108046642	G	T	SNV	0	0	0.333333	0	0	107	47	42	59	51	in EWC
Chr 5	109846062	T	G	SNV	0	0	0	0.538462	0	104	43	50	52	49	in EWC
Chr 5	111980230	C	T	SNV	0	0.40625	0	0	0	87	32	39	47	37	in EWC
[truncated: 706 more rows]

## Sheet: WGS of the offspring
Supplemental Data 2. List of somatic and germline mutations
					Valiant allele frequency of joint call by HaplotypeCaller *						Total read depth in the position								Valiant allele frequency
					VAF in WGS _100×	VAF in WGS _30×					Read depth in WGS _100×	Read depth in WGS _30×							VAF in WGS_100×	VAF in WGS_900×merge	VAF in amplicon sequence
#CHROM	POS	REF	ALT	TYPE	ConJ12 (100×)	Spouse #0718f1	Offspring #1027m1	Offspring #1027f1	Offspring #1027f2	Offspring #0624-2	ConJ12 (100×)	Spouse #0718f1	Offspring #1027m1	Offspring #1027f1	Offspring #1027f2	Offspring #0624-2	Mutations in the EWC region	Corresponding mosaic mutation	ConJ12 (100×)	ConJ12 (900×)	Spouse #0718f1	Offspring #1027m1	Offspring #1027f1	Offspring #1027f2	Offspring #0624-2	1
Chr 1	143539898	G	A	SNV	0	0	0	0	0	0.409091	65	37	34	36	41	22	in EWC
Chr 1	168246943	C	T	SNV	0	0	0	0.578947	0	0	118	42	38	38	54	36	in EWC
Chr 1	193125920	T	G	SNV	0.307692	0	0.5	0.363636	0	0	13	11	14	11	12	13	not in EWC
Chr 10	15875521	C	T	SNV	0	0	0.545455	0	0	0	85	36	44	39	45	29	in EWC
Chr 10	41868166	G	T	SNV	0	0	0	0.461538	0	0	102	40	35	26	47	30	in EWC
Chr 10	98220099	G	T	SNV	0	0	0	0.363636	0	0	92	18	17	11	16	28	not in EWC
Chr 10	104724009	G	A	SNV	0	0	0	0.538462	0	0	112	18	18	13	23	17	in EWC
Chr 10	106639317	C	G	SNV	0.0754717	0	0	0.666667	0	0	53	19	22	15	28	14	not in EWC	MosJ 56	0.0727273	0.135569	5.21866e-05	0	0.50092	0.000226881	0.000281057
Chr 10	112554099	C	A	SNV	0	0	0.545455	0	0	0	54	28	22	23	39	36	in EWC
Chr 11	37642617	A	T	SNV	0	0	0	0	0	0.384615	93	18	20	11	17	26	not in EWC
Chr 11	42650505	C	G	SNV	0	0	0.368421	0.564103	0	0.583333	96	29	38	39	27	24	in EWC	MosJ 83		0.0963455	0.000171462	0.494301	0.490522	0.000160158	0.502731
Chr 11	62597557	T	G	SNV	0	0.0571429	0	0.358974	0	0.0357143	48	35	29	39	32	28	not in EWC
Chr 11	104358280	C	T	SNV	0	0	0	0.352941	0	0	31	18	17	17	17	12	not in EWC
Chr 12	77727493	T	C	SNV	0	0	0.387097	0	0	0	89	24	31	44	47	28	in EWC
Chr 12	100895767	G	A	SNV	0	0	0	0.340426	0	0	79	38	30	47	65	40	in EWC
Chr 12	105922975	C	A	SNV	0	0	0.390244	0.0188679	0	0	71	59	41	53	58	31	in EWC
Chr 13	23581720	G	A	SNV	0.0392157	0	0	0.605263	0.487179	0.451613	102	25	26	38	39	31	not in EWC	MosJ 85		0.1425	0.00179131	0.00171571	0.482581	0.497858	0.50105
Chr 13	30174029	C	G	SNV	0	0	0	0	0	0.617647	91	44	31	38	41	34	in EWC
Chr 13	41601495	G	A	SNV	0.326531	0	0	0.393939	0.5	0	98	30	30	33	42	28	in EWC	MosJ 27	0.333333	0.31533	0.00275229	0.000809127	0.479144	0.481613	0.00163934
Chr 13	48878615	C	A	SNV	0	0	0	0	0.567568	0.0263158	85	58	54	67	74	38	in EWC
Chr 13	48940559	C	T	SNV	0	0	0.564103	0	0	0	80	41	39	40	56	40	in EWC
Chr 13	49899151	G	C	SNV	0	0	0.404762	0	0	0	103	42	42	44	46	37	in EWC
Chr 13	55198683	CG	AT	Multisite	0	0	0	0	0	0.52381	61	43	27	48	43	21	in EWC
Chr 13	75637999	G	T	SNV	0	0	0	0	0.333333	0	103	19	14	13	9	18	in EWC
Chr 13	84119729	A	G	SNV	0	0	0	0	0	0.444444	71	23	22	24	31	18	not in EWC
Chr 13	87219901	C	T	SNV	0	0	0	0	0.558824	0	107	23	23	23	34	28	not in EWC
Chr 13	93863818	CTCTCTC	GTCTCTG	Multisite	0	0	0	0	0	0.375	41	35	29	46	40	24	not in EWC
Chr 13	118300904	G	C	SNV	0	0	0	0	0.625	0	74	22	41	21	16	20	in EWC
Chr 14	53972970	ATATATATGTTTG	A	INDEL	0	0	0	0	0	0.421053	74	10	15	18	22	19	in EWC
Chr 14	64106542	G	C	SNV	0	0	0	0	0.363636	0	76	31	38	38	66	22	in EWC
Chr 14	107194100	G	A	SNV	0	0	0	0	0.625	0	60	18	18	24	32	15	not in EWC
Chr 14	124774722	G	A	SNV	0	0	0	0	0	0.333333	103	22	16	25	27	27	in EWC
Chr 15	30191837	G	A	SNV	0	0	0	0	0	0.37037	95	28	34	20	27	27	in EWC
Chr 15	71966133	T	A	SNV	0	0	0.047619	0.380952	0	0	16	22	21	21	16	14	not in EWC
Chr 15	95805006	C	T	SNV	0	0	0.454545	0	0	0	102	40	55	74	67	39	in EWC
Chr 16	20982022	A	C	SNV	0	0.0540541	0.037037	0.344828	0	0	59	37	27	29	28	24	not in EWC
Chr 17	38840615	G	T	SNV	0	0	0.333333	0	0	0	86	9	9	16	24	24	in EWC
Chr 17	40295234	C	T	SNV	0	0	0	0.407407	0	0	68	17	21	27	13	23	in EWC
Chr 17	53013749	G	T	SNV	0	0	0	0	0.037037	0.411765	56	12	24	12	27	17	not in EWC
Chr 17	70912839	T	A	SNV	0	0	0.0731707	0.423729	0	0	117	48	41	59	55	29	in EWC
Chr 17	77846054	CTGAAC	CTTAAAT	Multisite	0	0.075	0	0	0.527778	0	72	40	42	35	36	18	in EWC
Chr 17	84890355	A	C	SNV	0	0.0227273	0	0	0.04	0.333333	51	44	51	35	50	24	in EWC
Chr 18	7861764	A	T	SNV	0	0	0	0	0.588235	0	111	35	29	26	34	25	in EWC
Chr 18	11932586	C	T	SNV	0	0	0	0	0	0.571429	78	33	24	21	29	28	not in EWC
Chr 18	80810274	A	T	SNV	0	0	0	0	0	0.619048	100	38	15	35	35	21	in EWC
Chr 19	5097714	G	A	SNV	0	0	0	0.511628	0	0	42	41	29	43	45	26	not in EWC
Chr 2	27227127	G	A	SNV	0	0	0	0	0.484848	0	81	56	56	57	66	38	in EWC
Chr 2	32700321	C	T	SNV	0	0	0	0	0	0.55814	79	57	55	61	56	43	in EWC
Chr 2	154696261	A	T	SNV	0	0	0	0.5625	0	0	95	57	56	48	62	32	in EWC
Chr 2	156831942	G	A	SNV	0	0	0	0.531915	0	0	83	49	54	47	59	46	in EWC
Chr 2	162222415	T	A	SNV	0	0	0	0	0.625	0	89	35	22	36	40	23	in EWC
Chr 2	166195674	G	T	SNV	0	0	0.5	0	0	0	45	29	32	31	32	24	not in EWC
Chr 3	3021555	G	C	SNV	0	0	0	0	0.59375	0	83	63	56	78	64	29	not in EWC
Chr 3	21487544	A	G	SNV	0	0	0	0	0.472222	0	87	29	39	36	36	24	not in EWC
Chr 3	33638977	A	C	SNV	0	0	0	0	0	0.354839	81	39	31	45	36	31	in EWC
Chr 3	41468447	A	G	SNV	0	0	0	0	0.619048	0	80	27	16	25	21	30	in EWC
Chr 3	42842841	C	A	SNV	0	0	0.5	0.0666667	0	0	87	17	12	15	16	15	in EWC
Chr 3	43180517	G	A	SNV	0.0531915	0	0.615385	0.615385	0.473684	0.611111	94	12	13	26	19	18	in EWC	MosJ 2	0.0531915	0.160177	0.00285633	0.496666	0.489836	0.503427	0.505145
Chr 3	53560867	T	C	SNV	0	0	0	0	0	0.586207	64	46	48	34	55	29	in EWC
Chr 3	74062518	A	C	SNV	0	0	0	0	0.375	0	26	22	28	13	16	30	not in EWC
Chr 3	116029427	C	T	SNV	0	0	0	0.421053	0	0	107	35	43	38	42	22	in EWC
Chr 3	142056304	A	C	SNV	0	0	0	0	0	0.6	112	20	16	16	22	25	in EWC
Chr 4	38579210	C	G	SNV	0	0	0	0	0.428571	0	99	20	29	13	21	21	not in EWC
Chr 4	38748878	ACCT	A	INDEL	0	0	0	0.516129	0	0	113	10	19	31	16	20	in EWC
Chr 4	43639935	CGTGTGTGTGTGTGTGCGTGCGT	C	INDEL	0.272727	0	0.444444	0	0	0	11	38	36	28	38	28	not in EWC
Chr 4	115380763	G	A	SNV	0	0	0	0	0.431818	0	96	37	29	36	44	23	in EWC
Chr 5	78717370	T	A	SNV	0	0	0	0.548387	0	0	98	22	18	31	24	19	in EWC
Chr 5	114637727	G	A	SNV	0	0	0	0	0	0.44898	80	59	46	51	74	49	in EWC
Chr 5	116653758	C	T	SNV	0.0340909	0	0.5	0.511628	0	0	88	46	40	43	46	23	not in EWC	MosJ 84		0.134303	0.00846024	0.485063	0.479809	0.00671697	0.00656413
Chr 5	133821770	C	T	SNV	0.0142857	0	0	0.512821	0	0	70	39	52	39	35	30	in EWC
Chr 6	3239984	G	C	SNV	0	0	0	0	0	0.4	84	33	31	19	39	25	in EWC
Chr 6	4728416	CAGACCCATAACT	C	INDEL	0	0	0.6	0	0	0	69	32	30	25	33	24	in EWC
Chr 6	23653418	C	T	SNV	0	0	0	0	0.423077	0	95	29	37	26	26	34	in EWC
Chr 6	32459090	C	G	SNV	0.298969	0	0	0	0.512195	0	97	45	30	36	41	29	in EWC	MosJ 11	0.292929	0.300086	0.00127119	0.000686278	0.000619371	0.507673	0.000809225
Chr 6	39031537	G	C	SNV	0	0	0	0	0.372549	0	85	46	38	39	51	37	in EWC
Chr 6	68460125	G	A	SNV	0	0	0	0	0.46875	0	106	21	24	25	32	26	in EWC
Chr 6	74000800	C	T	SNV	0	0	0.545455	0	0	0	80	33	33	33	39	33	not in EWC
Chr 6	146428509	CA	C	INDEL	0	0	0	0	0	0.5	103	43	37	47	52	36	in EWC
Chr 7	14728786	C	T	SNV	0	0	0	0.470588	0	0	44	32	37	34	37	29	not in EWC	MosJ 91		0.0303644	0.00118146	0.0012481	0.499643	0.00104349	0.00151925
Chr 7	20787091	T	C	SNV	0	0.0588235	0	0.411765	0	0	71	17	13	17	21	12	not in EWC
Chr 7	28160560	GTCAGA	G	INDEL	0	0	0.483871	0	0	0	67	19	31	28	27	18	not in EWC
Chr 7	28475964	G	T	SNV	0	0	0.59375	0	0	0	92	34	32	35	46	43	in EWC
Chr 7	101660281	A	T	SNV	0	0	0.425532	0	0	0	78	38	47	37	58	35	in EWC
Chr 7	112869815	G	C	SNV	0	0.0322581	0	0	0.5	0	45	31	41	45	52	21	not in EWC
Chr 7	120122086	C	T	SNV	0	0	0.512195	0	0	0	95	54	41	58	64	42	in EWC
Chr 7	130554810	A	G	SNV	0.0133333	0	0.48	0	0	0	75	21	25	14	18	15	in EWC
Chr 7	133062332	C	A	SNV	0	0	0	0	0.0222222	0.47619	94	54	56	36	45	42	in EWC
Chr 8	67522089	G	A	SNV	0	0	0.588235	0	0	0	99	32	34	35	50	29	in EWC
Chr 8	105247446	C	A	SNV	0	0	0	0	0.395833	0	94	40	38	47	48	29	in EWC
Chr 8	117728055	G	A	SNV	0	0	0.363636	0.0833333	0.05	0	19	17	11	12	20	13	not in EWC
Chr 9	5336158	A	G	SNV	0	0	0	0	0.44	0	106	22	23	25	25	16	in EWC
Chr 9	38124126	C	T	SNV	0	0	0.466667	0	0	0	95	26	30	30	18	11	not in EWC
Chr 9	53691795	T	A	SNV	0	0	0	0	0	0.64	77	49	44	34	41	25	in EWC
Chr 9	54375185	G	A	SNV	0	0	0.574074	0	0	0	98	38	54	56	60	31	in EWC
Chr 9	63121269	G	A	SNV	0	0	0	0	0.037037	0.5	77	29	21	24	27	18	not in EWC
Chr 9	76716060	T	A	SNV	0	0.075	0	0.425532	0	0	98	40	34	47	45	33	in EWC
Chr 9	89698615	G	T	SNV	0	0	0	0	0.589744	0	100	33	41	50	39	25	in EWC
Chr 9	89867928	C	T	SNV	0	0	0	0	0	0.583333	67	32	39	39	39	24	in EWC
				1
* We called variants by following criteria in the analysis of offspring of mouse ConJ12.
For variants within the EWC region,
1) VAF of >33% and <67% in each individual.
2) VAF of <35% in mouse ConJ12 (father of offspring) and VAF of <10％ in its spouse (mother of offspring).
3) Variants supported by both forward and reverse strand reads (at least one "ALT" in both strands).
For variants outside the EWC region,
1) VAF of >33% and <67% in each individual.
2) VAF of <35% in mouse ConJ12 (father of offspring) and VAF of <10％ in its spouse (mother of offspring).
3) Variants with a depth greater than 10 in all samples.
4) Variants supported by both forward and reverse strand reads (at least one "ALT" in both strands).
5) Exclude variants with one or more "ALT" reads found in all four offspring.
6) Exclude variants with one or more "ALT" reads in both ConJ12 and its spouse.
7) Exclude variants with VAFs of >10% and <33% in multiple samples of offspring.
