# Supplementary material for: Early embryonic mutations reveal dynamics of somatic and germ cell lineages in mice
Source: HighWire-hosted journal article supplement (doi:10.1101/gr.276363.121), 2022-05-09
Supplement: Supplemental_Data_3.xlsx [file Supplemental_Data_3.xlsx]

## Sheet: PCR condition
Supplemental Data 3. PCR conditions for amplicon-based targeted sequencing
	#	Chr	Pos		REF	ALT	VAF tail	VAF testis	Target size	Overhang(L)	seq_L	pos_primerL	Overhang(R)	seq_R	pos_primerR	Annealing Tm for PCR	Individual PCR (Enzyme)	Redesigned primer set
ConB23	#1	4	143311480	snp	G	A	0.0540541		403	TCGTCGGCAGCGTCAGATGTGTATAAGAGACAG	AGAAAGAGAAAAGAGCAGGAGC	143311412	GTCTCGTGGGCTCGGAGATGTGTATAAGAGACAG	TCAATTCCAAGAACTCCAGGGG	143311814	66℃	-	-
ConB23	#2	6	69604918	snp	A	C	0.0561798		479	TCGTCGGCAGCGTCAGATGTGTATAAGAGACAG	GAGTTAGTGAGTGTTGCTGCG	69604791	GTCTCGTGGGCTCGGAGATGTGTATAAGAGACAG	TGCATCATGAACAAGCCTTTGG	69605269	66℃	-	-
ConB23	#5	10	100917722	snp	G	T	0.0612245		403	TCGTCGGCAGCGTCAGATGTGTATAAGAGACAG	AAGAAGAAAAGGACAAATGAGCC	100917640	GTCTCGTGGGCTCGGAGATGTGTATAAGAGACAG	AATTTGAGTATATGACCAGAGAACTG	100918042	60℃	-	-
ConB23	#6	2	20934560	snp	T	G	0.0746269		427	TCGTCGGCAGCGTCAGATGTGTATAAGAGACAG	ACTCCTGGTAGCAGAAAACAAAAC	20934467	GTCTCGTGGGCTCGGAGATGTGTATAAGAGACAG	ACGAGAACCAGGATTTAGGGC	20934893	63℃	-	-
ConB23	#9	6	60830987	snp	C	G	0.0849057		400	TCGTCGGCAGCGTCAGATGTGTATAAGAGACAG	CCTACATAAATATCACCAGCTTCCAC	60830919	GTCTCGTGGGCTCGGAGATGTGTATAAGAGACAG	AACTGGCCAGACTGTGTGAC	60831318	60℃	-	-
ConB23	#10	X	40850187	snp	C	T	0.0851064		400	TCGTCGGCAGCGTCAGATGTGTATAAGAGACAG	CAGGTTAGTAGGACAACCATTGC	40850131	GTCTCGTGGGCTCGGAGATGTGTATAAGAGACAG	ACTAGTTAGCACTGAGTCTACTCC	40850530	60℃	-	-
ConB23	#11	12	77658730	snp	T	A	0.0882353		422	TCGTCGGCAGCGTCAGATGTGTATAAGAGACAG	ACACACACATACACACAGTGC	77658661	GTCTCGTGGGCTCGGAGATGTGTATAAGAGACAG	CCATAGCCCTGCCAGCTAAG	77659082	63℃	-	-
ConB23	#12	2	47215631	snp	G	T	0.0897436		400	TCGTCGGCAGCGTCAGATGTGTATAAGAGACAG	AGAGTCAAGAGCTACAGGGTAC	47215527	GTCTCGTGGGCTCGGAGATGTGTATAAGAGACAG	AGAAGAACAAAGTCAAAGTGTGG	47215926	66℃	-	-
ConB23	#13	12	99045087	snp	G	C	0.0909091		402	TCGTCGGCAGCGTCAGATGTGTATAAGAGACAG	GATGGGGTGAGGACTGATGG	99045000	GTCTCGTGGGCTCGGAGATGTGTATAAGAGACAG	ACAAGGTCTGACAAAAAGTTCAG	99045401	60℃	-	-
ConB23	#14	13	97554893	snp	T	A	0.0918367		402	TCGTCGGCAGCGTCAGATGTGTATAAGAGACAG	GTGGCTCTCCTCAAGGTCTC	97554786	GTCTCGTGGGCTCGGAGATGTGTATAAGAGACAG	AGAAAGCCTGGTCCCTTTCAC	97555187	60℃	-	-
ConB23	#15	3	47271707	snp	C	A	0.0957447		430	TCGTCGGCAGCGTCAGATGTGTATAAGAGACAG	AGGGCACAGTGACTGTATCTAC	47271630	GTCTCGTGGGCTCGGAGATGTGTATAAGAGACAG	ACTCAAGCAGGCAAACAAGC	47272059	60℃	-	-
ConB23	#17	9	19412175	snp	A	G	0.103448		410	TCGTCGGCAGCGTCAGATGTGTATAAGAGACAG	TGTCACATGTCCTCTCATGGG	19412077	GTCTCGTGGGCTCGGAGATGTGTATAAGAGACAG	AAGCAGCTAGGCACATCCAC	19412486	60℃	-	-
ConB23	#18	X	104429236	snp	A	T	0.106383		478	TCGTCGGCAGCGTCAGATGTGTATAAGAGACAG	TGGAGCCATCTTAAAATTTTGCTC	104429111	GTCTCGTGGGCTCGGAGATGTGTATAAGAGACAG	CACAGAGAAACCCTGTCTCG	104429588	60℃	-	-
ConB23	#19	18	21819951	snp	G	T	0.106667		451	TCGTCGGCAGCGTCAGATGTGTATAAGAGACAG	TGGTTGCTAATTTTCTCCCTCAG	21819849	GTCTCGTGGGCTCGGAGATGTGTATAAGAGACAG	AGGCTAGCCTGGAAAACTGG	21820299	60℃	-	-
ConB23	#20	4	69469458	snp	A	G	0.107527		444	TCGTCGGCAGCGTCAGATGTGTATAAGAGACAG	AGAGCAGTAAGATATCCACAGGG	69469363	GTCTCGTGGGCTCGGAGATGTGTATAAGAGACAG	TGTTTGTTCTGACACAGTCTTATAG	69469806	63℃	-	-
ConB23	#21	3	94900762	snp	C	T	0.109375		424	TCGTCGGCAGCGTCAGATGTGTATAAGAGACAG	AGCTGAAGCAGACACAGGTG	94900679	GTCTCGTGGGCTCGGAGATGTGTATAAGAGACAG	CTCGAGTCAGCAGGAAGGAC	94901102	66℃	-	-
ConB23	#22	5	118769585	snp	C	G	0.120879		430	TCGTCGGCAGCGTCAGATGTGTATAAGAGACAG	GCTGCATTGTGTAGGTCACTG	118769466	GTCTCGTGGGCTCGGAGATGTGTATAAGAGACAG	TGCCTCATCTTTAGGCACAGG	118769895	63℃	-	-
ConB23	#24	12	99132221	snp	G	T	0.155556		401	TCGTCGGCAGCGTCAGATGTGTATAAGAGACAG	AGTGCTTCAAATGGAGATTATGGAG	99132153	GTCTCGTGGGCTCGGAGATGTGTATAAGAGACAG	AACTAACGCAGGGCCTAGTG	99132553	66℃	-	-
ConB23	#25	12	99140750	snp	C	A	0.179487		412	TCGTCGGCAGCGTCAGATGTGTATAAGAGACAG	CAGCCCTCCCACGTCAATC	99140671	GTCTCGTGGGCTCGGAGATGTGTATAAGAGACAG	GCAGGCTGAGGTGAACTCTG	99141082	66℃	-	-
ConB23	#26	6	21434032	snp	C	G	0.192661		412	TCGTCGGCAGCGTCAGATGTGTATAAGAGACAG	TGGACTTATGAAGCTCTGGC	21433969	GTCTCGTGGGCTCGGAGATGTGTATAAGAGACAG	GTTGGTCTGGAATTGGCATCC	21434380	60℃	-	-
ConB23	#28	15	54848437	snp	T	G	0.235955		417	TCGTCGGCAGCGTCAGATGTGTATAAGAGACAG	TGCATGGGGAGTAAAGACACTC	54848312	GTCTCGTGGGCTCGGAGATGTGTATAAGAGACAG	TCCTCAGGAAAGCCATGCAC	54848728	60℃	-	-
ConB23	#30	6	23822367	snp	A	G	0.277228		406	TCGTCGGCAGCGTCAGATGTGTATAAGAGACAG	ACTGGTAGCAAATCCTCTCAC	23822283	GTCTCGTGGGCTCGGAGATGTGTATAAGAGACAG	AGGCAGGGTATCTCACTTAAGC	23822688	60℃	-	-
ConB23	#31	4	21959891	snp	C	T	0.342342		440	TCGTCGGCAGCGTCAGATGTGTATAAGAGACAG	TTATGCTGTTGGAAGCCTCC	21959804	GTCTCGTGGGCTCGGAGATGTGTATAAGAGACAG	TGGAGAATCCATCATGGTACGC	21960243	66℃	-	-
ConB23	#34	15	72448744	indel	GT	G	0.097561		400	TCGTCGGCAGCGTCAGATGTGTATAAGAGACAG	TCCAAATTGGCAATGTGATTGAG	72448656	GTCTCGTGGGCTCGGAGATGTGTATAAGAGACAG	GTAGCAGCAGAGGCAAGATG	72449055	63℃	-	-
ConB23	#35	3	147251890	indel	GT	G	0.185714		401	TCGTCGGCAGCGTCAGATGTGTATAAGAGACAG	TATGCCTGAGCCCTAGTGTG	147251834	GTCTCGTGGGCTCGGAGATGTGTATAAGAGACAG	AGGGACCCTTGAGAGCAAATAAG	147252234	60℃	-	-
ConB23	#37	6	129867463	snp	G	C	0.075		416	TCGTCGGCAGCGTCAGATGTGTATAAGAGACAG	gctcggtccaccatttcact	129867378	GTCTCGTGGGCTCGGAGATGTGTATAAGAGACAG	atagggtggtggcctcctag	129867793	60℃	-	-
ConB23	#38	16	41786834	snp	T	G	0.1		401	TCGTCGGCAGCGTCAGATGTGTATAAGAGACAG	GGAAAAATGGATCGCAGGCC	41786784	GTCTCGTGGGCTCGGAGATGTGTATAAGAGACAG	CCTACCCAGTGCCATCTCAC	41787184	63℃	-	-
ConB23	#42	8	52004504	snp	C	A	0.0746269		407	TCGTCGGCAGCGTCAGATGTGTATAAGAGACAG	ccaggcacaaaagaacacaca	52004421	GTCTCGTGGGCTCGGAGATGTGTATAAGAGACAG	tctcctggagattggcctct	52004827	63℃	-	-
ConB23	#43	10	123946087	snp	C	T	0.193548		404	TCGTCGGCAGCGTCAGATGTGTATAAGAGACAG	AAGGCACATGGAACCTAGGA	123945977	GTCTCGTGGGCTCGGAGATGTGTATAAGAGACAG	ACTCAGAAAAGCAGGCAGACT	123946380	63℃	-	-
ConB23	#45	2	75787115	snp	C	T	0.0412371		401	TCGTCGGCAGCGTCAGATGTGTATAAGAGACAG	ACAAAATGCCTGTAACTCTAGCACTG	75787002	GTCTCGTGGGCTCGGAGATGTGTATAAGAGACAG	ACTGTGTGTGTTGGGTATGTGTGTG	75787402	66℃	Takara EX Taq Hot Start	-
ConB23	#48	12	117745716	snp	C	T	0.0421053		410	TCGTCGGCAGCGTCAGATGTGTATAAGAGACAG	ACTCACACACATGCACACACTCAC	117745653	GTCTCGTGGGCTCGGAGATGTGTATAAGAGACAG	TGCTTCAATCTCTCCCCTTAAGCTC	117746062	66℃	Takara EX Taq Hot Start	-
ConB23	#49	15	58307386	snp	G	A	0.0430108		403	TCGTCGGCAGCGTCAGATGTGTATAAGAGACAG	AGTCTGTAATGACTCAGTGGCCAC	58307312	GTCTCGTGGGCTCGGAGATGTGTATAAGAGACAG	TCTGGGAGAAGGCAGAACTTGACC	58307714	66℃	Takara EX Taq Hot Start	-
ConB23	#54	1	105890306	snp	G	A	0.0490196		400	TCGTCGGCAGCGTCAGATGTGTATAAGAGACAG	CCTACAGAGCTGAGTGGTGAATGTTG	105890226	GTCTCGTGGGCTCGGAGATGTGTATAAGAGACAG	GGAGATGGCTCAGTGGCTCAGG	105890625	66℃	-	-
ConB23	#60	11	113342466	indel	GGT	G	0.0434783		402	TCGTCGGCAGCGTCAGATGTGTATAAGAGACAG	GGTAACTCCGTCCTGTGTGTGTTC	113342417	GTCTCGTGGGCTCGGAGATGTGTATAAGAGACAG	CCAACCTTCTAACAACTGCACCCC	113342818	66℃	Takara EX Taq Hot Start	-
ConB23	#62	1	145925285	snp	A	G	0.149123		237	GTCTCGTGGGCTCGGAGATGTGTATAAGAGACAG	TTTCTTCTGGGTCTGCCATGAACTC	145925118	TCGTCGGCAGCGTCAGATGTGTATAAGAGACAG	TGTGAGATCTGTCTTTCTGCtttgtc	145925354	69℃	-	-
ConB23	#80	13	87886068	snp	A	C	0.0561798		211	TCGTCGGCAGCGTCAGATGTGTATAAGAGACAG	gattgaggcagaattgtttgggcag	87885985	GTCTCGTGGGCTCGGAGATGTGTATAAGAGACAG	AATGTCCAACAACTGCAGCCAATAG	87886195	69℃	-	-
ConB23	#82	14	86131940	snp	G	A	0.0666667		288	TCGTCGGCAGCGTCAGATGTGTATAAGAGACAG	agaaagaacctgggacgagaaaacc	86131895	GTCTCGTGGGCTCGGAGATGTGTATAAGAGACAG	cctgccttaaccacttgttgacatg	86132182	72℃	-	-
ConC31	#2	1	100654069	snp	G	A	0.30303		282	GTCTCGTGGGCTCGGAGATGTGTATAAGAGACAG	CCCTTGTAAGGTCTCTAGACGCAAC	100653857	TCGTCGGCAGCGTCAGATGTGTATAAGAGACAG	ATATTGCATCCACAGGAGCTGATGG	100654138	63℃	-	-
ConC31	#3	1	124010062	snp	G	A	0.0555556		279	GTCTCGTGGGCTCGGAGATGTGTATAAGAGACAG	agtaccccagagcttgtgtctctag	124009857	TCGTCGGCAGCGTCAGATGTGTATAAGAGACAG	atgccctgaaatcttagctacagcc	124010135	66℃	-	-
ConC31	#4	1	130818778	snp	C	T	0.0510204		274	GTCTCGTGGGCTCGGAGATGTGTATAAGAGACAG	CTGCCTTTTGGAATTTGGGGAAGTG	130818570	TCGTCGGCAGCGTCAGATGTGTATAAGAGACAG	TACCTGAGGGCTAGTGTCTGAACTC	130818843	66℃	-	-
ConC31	#5	1	142596953	snp	C	A	0.0526316		270	TCGTCGGCAGCGTCAGATGTGTATAAGAGACAG	ttgttgaacatcagtggaaggaggg	142596857	GTCTCGTGGGCTCGGAGATGTGTATAAGAGACAG	atccacttgtcactgagtgcatacc	142597126	69℃	-	-
ConC31	#6	1	148821870	snp	C	G	0.0425532		200	GTCTCGTGGGCTCGGAGATGTGTATAAGAGACAG	ATGAATTTGGAATTGAGCCAGGTCC	148821759	TCGTCGGCAGCGTCAGATGTGTATAAGAGACAG	taaCATCGTCAATAGAAGCCAGCCC	148821958	66℃	-	-
ConC31	#7	1	174783857	snp	A	G	0.0408163		300	GTCTCGTGGGCTCGGAGATGTGTATAAGAGACAG	ACCAACTTCAATTTCTTAAATGGAggg	174783661	TCGTCGGCAGCGTCAGATGTGTATAAGAGACAG	accacaaaacaaagagtaactaaaccttag	174783960	63℃	-	-
ConC31	#8	2	87573610	snp	A	C	0.0681818		300	TCGTCGGCAGCGTCAGATGTGTATAAGAGACAG	ACTGTTAGAGTGGTCCAGATATTTAGC	87573544	GTCTCGTGGGCTCGGAGATGTGTATAAGAGACAG	TTACCCTGGGGATACATTCCTTGCC	87573843	63℃	-	-
ConC31	#9	3	59038529	snp	G	A	0.0888889		289	TCGTCGGCAGCGTCAGATGTGTATAAGAGACAG	TCTCTTCTCATCTCCCCCAAAGTCC	59038486	GTCTCGTGGGCTCGGAGATGTGTATAAGAGACAG	GCATTCTTCAAAGACTACAGGTGCC	59038774	63℃	-	-
ConC31	#10	3	71549988	snp	G	A	0.04		298	GTCTCGTGGGCTCGGAGATGTGTATAAGAGACAG	tgctctacaatgctatcttgactgc	71549799	TCGTCGGCAGCGTCAGATGTGTATAAGAGACAG	ACTGACTTCATAGCAGATGTGTGCC	71550096	69℃	-	-
ConC31	#11	4	13334924	snp	G	A	0.08		280	TCGTCGGCAGCGTCAGATGTGTATAAGAGACAG	cacaggctggtaacctcagtgaatc	13334874	GTCTCGTGGGCTCGGAGATGTGTATAAGAGACAG	cacacacacacacacacaAATCTCC	13335153	66℃	-	-
ConC31	#12	4	23886338	snp	T	C	0.12766		214	GTCTCGTGGGCTCGGAGATGTGTATAAGAGACAG	AGATTTAACTGAGGGCCTTTCCATGG	23886208	TCGTCGGCAGCGTCAGATGTGTATAAGAGACAG	AACTCAGATGCTTTTCCTCTGTTGC	23886421	63℃	-	-
ConC31	#13	4	28182068	snp	T	C	0.394737		212	TCGTCGGCAGCGTCAGATGTGTATAAGAGACAG	agtttctctgtgtgcttctggtgtc	28182013	GTCTCGTGGGCTCGGAGATGTGTATAAGAGACAG	aaggtcaggaattcaaggcccatac	28182224	69℃	-	-
ConC31	#14	4	33960413	snp	C	T	0.197368		295	GTCTCGTGGGCTCGGAGATGTGTATAAGAGACAG	CTTCCATTCACCAATTCACTCAGGAATTC	33960179	TCGTCGGCAGCGTCAGATGTGTATAAGAGACAG	agcctttgaaactgtaagcccaaataaac	33960473	63℃	-	-
ConC31	#15	4	54234247	snp	G	A	0.0917431		290	GTCTCGTGGGCTCGGAGATGTGTATAAGAGACAG	AGCATCTCTACCCTCTCAGTGTGAG	54234094	TCGTCGGCAGCGTCAGATGTGTATAAGAGACAG	TTATGGGATGCCAGCCTCATCTTTC	54234383	66℃	-	-
ConC31	#16	4	65972739	snp	C	T	0.0537634		205	TCGTCGGCAGCGTCAGATGTGTATAAGAGACAG	AATGACATCAGGTCCCTAGGTCTCC	65972686	GTCTCGTGGGCTCGGAGATGTGTATAAGAGACAG	TAACCATCTAGTATTTGGGCCAGGC	65972890	63℃	-	-
ConC31	#17	4	69459480	snp	T	A	0.0932203		238	TCGTCGGCAGCGTCAGATGTGTATAAGAGACAG	GAAGTGTGAGGCATCTTCTCTCCAG	69459411	GTCTCGTGGGCTCGGAGATGTGTATAAGAGACAG	tgaccctgtacccatttctaacctc	69459648	63℃	-	-
ConC31	#18	4	96812294	snp	C	A	0.0471698		293	GTCTCGTGGGCTCGGAGATGTGTATAAGAGACAG	aagaaagaaggcacaagcaaggatg	96812089	TCGTCGGCAGCGTCAGATGTGTATAAGAGACAG	aacctgataaacagcttcagtgcac	96812381	63℃	-	-
ConC31	#19	4	133438457	snp	C	T	0.390625		297	TCGTCGGCAGCGTCAGATGTGTATAAGAGACAG	gagtgacttctgtgttgtctcaggg	133438392	GTCTCGTGGGCTCGGAGATGTGTATAAGAGACAG	ctcagttcagctcagacttctggag	133438688	63℃	-	-
ConC31	#20	5	114461155	snp	T	C	0.0481928		237	TCGTCGGCAGCGTCAGATGTGTATAAGAGACAG	TCAGGGAGGGAGTTTTCCTAGGAAG	114461109	GTCTCGTGGGCTCGGAGATGTGTATAAGAGACAG	CTGTGGCTGAGGAACTAGTTCACTG	114461345	63℃	-	-
ConC31	#21	6	65556640	snp	C	G	0.402597		299	TCGTCGGCAGCGTCAGATGTGTATAAGAGACAG	ggatctgagacagcattagggaagc	65556555	GTCTCGTGGGCTCGGAGATGTGTATAAGAGACAG	tctcacctgtgaagactagtctcgg	65556853	69℃	-	-
ConC31	#22	6	71759873	snp	A	T	0.397959		293	TCGTCGGCAGCGTCAGATGTGTATAAGAGACAG	tattttatGGgtatggatgttttgcctgc	71759767	GTCTCGTGGGCTCGGAGATGTGTATAAGAGACAG	AGAGTATAGCCAAAAGGAGTTATTCAGCG	71760059	63℃	-	-
ConC31	#23	6	99684612	snp	G	T	0.0454545		202	GTCTCGTGGGCTCGGAGATGTGTATAAGAGACAG	ATGGTGGCTCTCTCTGTCCTATACC	99684491	TCGTCGGCAGCGTCAGATGTGTATAAGAGACAG	agcacctaaagaatgacacccaagg	99684692	63℃	-	-
ConC31	#24	6	120789904	snp	C	T	0.363636		289	GTCTCGTGGGCTCGGAGATGTGTATAAGAGACAG	TGTAAGCACACCTCATACTGCCATG	120789665	TCGTCGGCAGCGTCAGATGTGTATAAGAGACAG	AAGCTTCAAGAATACAGCCTGAggg	120789953	63℃	-	-
ConC31	#25	7	26506357	snp	G	T	0.0384615		287	TCGTCGGCAGCGTCAGATGTGTATAAGAGACAG	taaggctgtaatgaagatagtggagcatg	26506263	GTCTCGTGGGCTCGGAGATGTGTATAAGAGACAG	tcaaaagaagcctgagattattccacctc	26506549	66℃	-	-
ConC31	#26	7	28171943	snp	G	A	0.109756		285	TCGTCGGCAGCGTCAGATGTGTATAAGAGACAG	CAGACGTTTGCTGACTGATTGTTGG	28171814	GTCTCGTGGGCTCGGAGATGTGTATAAGAGACAG	TTGAGATTCATCAACCCAGGCTGTC	28172098	63℃	-	-
ConC31	#27	7	89164333	snp	C	T	0.0987654		248	GTCTCGTGGGCTCGGAGATGTGTATAAGAGACAG	ACCTTCCCATTACCCCACAAATCAC	89164189	TCGTCGGCAGCGTCAGATGTGTATAAGAGACAG	AAGCTGAATCAAAATGTCTGCTGGG	89164436	69℃	-	-
ConC31	#28	8	41684566	snp	A	G	0.182927		210	GTCTCGTGGGCTCGGAGATGTGTATAAGAGACAG	atgaatgtgggtgcccttgaatttg	41684405	TCGTCGGCAGCGTCAGATGTGTATAAGAGACAG	acactacctcaaagtaaaaggctgg	41684614	69℃	-	-
ConC31	#29	8	43469172	snp	C	T	0.0384615		295	GTCTCGTGGGCTCGGAGATGTGTATAAGAGACAG	atatgtatgccagcagaaggtgtgg	43468938	TCGTCGGCAGCGTCAGATGTGTATAAGAGACAG	TCGTGGCTTTCTCACACTATTAGCC	43469232	66℃	-	-
ConC31	#30	8	53296152	snp	A	G	0.0449438		285	TCGTCGGCAGCGTCAGATGTGTATAAGAGACAG	catcttgctagtgtgtgcaatgctg	53296103	GTCTCGTGGGCTCGGAGATGTGTATAAGAGACAG	ccagttagaacaccggatatcagcg	53296387	66℃	-	-
ConC31	#31	8	70314038	snp	T	C	0.0384615		230	GTCTCGTGGGCTCGGAGATGTGTATAAGAGACAG	GACATGCtcagtagtggacctttcc	70313880	TCGTCGGCAGCGTCAGATGTGTATAAGAGACAG	ctgcccggcCTGTATttagtttttg	70314109	63℃	-	-
ConC31	#32	8	94623337	snp	T	C	0.0576923		232	GTCTCGTGGGCTCGGAGATGTGTATAAGAGACAG	AGAAGACAATGTTGACACCCACCAG	94623141	TCGTCGGCAGCGTCAGATGTGTATAAGAGACAG	CCATGACACTGGAGTCGACAGTAAG	94623372	72℃	-	-
ConC31	#33	8	109983714	snp	T	A	0.393258		290	GTCTCGTGGGCTCGGAGATGTGTATAAGAGACAG	gcacctccaatgttgagttggtttc	109983556	TCGTCGGCAGCGTCAGATGTGTATAAGAGACAG	gaagacatcaggaaaggaggccatc	109983845	63℃	-	-
ConC31	#34	9	64772398	snp	G	A	0.0595238		278	TCGTCGGCAGCGTCAGATGTGTATAAGAGACAG	aagtgtttgagagtggatggagctg	64772338	GTCTCGTGGGCTCGGAGATGTGTATAAGAGACAG	tgagtactggaattgcaggcatgag	64772615	66℃	-	-
ConC31	#35	9	97584803	snp	A	T	0.037037		228	TCGTCGGCAGCGTCAGATGTGTATAAGAGACAG	GATATGTGAGCACTCTGAGATGGGC	97584690	GTCTCGTGGGCTCGGAGATGTGTATAAGAGACAG	AATGTCAGACCGAGGGTGAAACATC	97584917	66℃	-	-
ConC31	#36	10	22035063	snp	C	T	0.369863		275	GTCTCGTGGGCTCGGAGATGTGTATAAGAGACAG	GCAGCAGCGATTTAGGAAATCAAGG	22034844	TCGTCGGCAGCGTCAGATGTGTATAAGAGACAG	GAGGTGTTGGAGATAAAGCTCAGGG	22035118	63℃	-	-
ConC31	#38	10	54462770	snp	C	A	0.402299		248	GTCTCGTGGGCTCGGAGATGTGTATAAGAGACAG	actatacaaggatggacaccacgtc	54462558	TCGTCGGCAGCGTCAGATGTGTATAAGAGACAG	tcctgagatggattcctgtaagcag	54462805	63℃	-	-
ConC31	#39	10	81145162	snp	A	T	0.0416667		271	TCGTCGGCAGCGTCAGATGTGTATAAGAGACAG	ACAGAAGGGTGAGAAGAAAATCCGG	81145062	GTCTCGTGGGCTCGGAGATGTGTATAAGAGACAG	AAGAGAAGGGCAAGTCTAGGAGGAG	81145332	63℃	-	-
ConC31	#40	10	101367929	snp	C	T	0.0952381		300	TCGTCGGCAGCGTCAGATGTGTATAAGAGACAG	TGTTCGTCCCCCTTTTCTTACCAAC	101367805	GTCTCGTGGGCTCGGAGATGTGTATAAGAGACAG	gaagtgctgaattctgggcattgtg	101368104	63℃	-	-
ConC31	#41	11	104607828	snp	C	G	0.15873		266	GTCTCGTGGGCTCGGAGATGTGTATAAGAGACAG	GCCCGTTGAGGAAAAGAATGAAACC	104607638	TCGTCGGCAGCGTCAGATGTGTATAAGAGACAG	GTAAACTTTGCAATCTTCCCCAGCC	104607903	63℃	-	-
ConC31	#42	12	91680366	snp	A	G	0.0377358		216	GTCTCGTGGGCTCGGAGATGTGTATAAGAGACAG	AACAGAAACGCCAGGTAGTTCTCTG	91680240	TCGTCGGCAGCGTCAGATGTGTATAAGAGACAG	AATGAGGAAGTTGAGCAAGGAGGTG	91680455	63℃	-	-
ConC31	#43	12	110677949	snp	T	C	0.0421053		241	GTCTCGTGGGCTCGGAGATGTGTATAAGAGACAG	GAGTCTCAGAGGCCTTATCTAGGGG	110677826	TCGTCGGCAGCGTCAGATGTGTATAAGAGACAG	aggcaggtggatttctgagttcaag	110678066	72℃	-	-
ConC31	#44	13	48081740	snp	T	A	0.0576923		277	GTCTCGTGGGCTCGGAGATGTGTATAAGAGACAG	AGCATCACACTGAACTCAATAGGGC	48081586	TCGTCGGCAGCGTCAGATGTGTATAAGAGACAG	agaacccaaagctcagctcatcttc	48081862	63℃	-	-
ConC31	#45	13	48503783	snp	A	G	0.0666667		235	GTCTCGTGGGCTCGGAGATGTGTATAAGAGACAG	agatagccagacctccatccagatc	48503589	TCGTCGGCAGCGTCAGATGTGTATAAGAGACAG	tggtggtttgaataggaatggctcc	48503823	66℃	-	-
ConC31	#46	13	82363212	snp	C	A	0.039604		265	GTCTCGTGGGCTCGGAGATGTGTATAAGAGACAG	CAGGAGTCTTTCAGGAGACCATGTG	82363042	TCGTCGGCAGCGTCAGATGTGTATAAGAGACAG	aatgccgtatagctggatcttgtgg	82363306	63℃	-	-
ConC31	#47	13	86043856	snp	T	C	0.0673077		242	TCGTCGGCAGCGTCAGATGTGTATAAGAGACAG	TCTTTCTTGCAATTGTCCTGTAGGC	86043751	GTCTCGTGGGCTCGGAGATGTGTATAAGAGACAG	AGGATTACTTGTTGGCAGGGAAAGG	86043992	69℃	-	-
ConC31	#48	14	59995897	snp	A	G	0.0465116		246	GTCTCGTGGGCTCGGAGATGTGTATAAGAGACAG	TCCCACAAAACCATCTCTTCAGCTC	59995737	TCGTCGGCAGCGTCAGATGTGTATAAGAGACAG	ggcaggtggatttctgagttctagg	59995982	69℃	-	-
ConC31	#49	14	63058987	snp	G	A	0.0531915		220	TCGTCGGCAGCGTCAGATGTGTATAAGAGACAG	tgggatcaggacagaatttctaacag	63058939	GTCTCGTGGGCTCGGAGATGTGTATAAGAGACAG	acagaaagaattgaagaggggctgg	63059158	63℃	-	-
ConC31	#50	14	107286734	snp	A	C	0.277778		200	TCGTCGGCAGCGTCAGATGTGTATAAGAGACAG	acttctactactactactactactgctgc	107286664	GTCTCGTGGGCTCGGAGATGTGTATAAGAGACAG	ttcaatagtacttcccaagctctgcc	107286863	63℃	-	-
ConC31	#51	15	29487549	snp	A	T	0.165049		252	GTCTCGTGGGCTCGGAGATGTGTATAAGAGACAG	gagatgtgggatgtggagcagttg	29487380	TCGTCGGCAGCGTCAGATGTGTATAAGAGACAG	TCTCTCCTCTCTTTTTCTTCCTTTTCG	29487631	63℃	-	-
ConC31	#52	15	86468203	snp	C	T	0.185484		269	GTCTCGTGGGCTCGGAGATGTGTATAAGAGACAG	actgttctctctgggtagctctctc	86467994	TCGTCGGCAGCGTCAGATGTGTATAAGAGACAG	cagattcctgagttcatggtcagcc	86468262	69℃	-	-
ConC31	#53	16	96593359	snp	G	A	0.0875		270	GTCTCGTGGGCTCGGAGATGTGTATAAGAGACAG	TCTTGGGAGCTGCTCATTTTAGCTG	96593129	TCGTCGGCAGCGTCAGATGTGTATAAGAGACAG	GCCTCCATACCTACGAATGGACTTC	96593398	63℃	-	-
ConC31	#54	17	19461459	snp	C	T	0.0531915		287	TCGTCGGCAGCGTCAGATGTGTATAAGAGACAG	ctgttggtgatggcttgcatctatg	19461423	GTCTCGTGGGCTCGGAGATGTGTATAAGAGACAG	tgggaggagtatgggggattttagg	19461709	66℃	-	-
ConC31	#55	17	54646345	snp	T	C	0.0545455		276	GTCTCGTGGGCTCGGAGATGTGTATAAGAGACAG	tgaggaaaaccaatagccctgagtg	54646164	TCGTCGGCAGCGTCAGATGTGTATAAGAGACAG	gtccctgtgccctttagttagtctg	54646439	72℃	-	-
ConC31	#56	17	67312714	snp	A	G	0.04		291	GTCTCGTGGGCTCGGAGATGTGTATAAGAGACAG	AAACACAGTCTTCCACCTTGTCCAC	67312555	TCGTCGGCAGCGTCAGATGTGTATAAGAGACAG	TAACGTGAACCACTGAATCAGCTCC	67312845	63℃	-	-
ConC31	#57	19	52141357	snp	T	C	0.043956		257	TCGTCGGCAGCGTCAGATGTGTATAAGAGACAG	cacacacacacactcactcactcac	52141244	GTCTCGTGGGCTCGGAGATGTGTATAAGAGACAG	gagaaagggctacttctgggacttg	52141500	69℃	-	-
ConC31	#58	1	132748767	indel	TCA	T	0.0470588		207	GTCTCGTGGGCTCGGAGATGTGTATAAGAGACAG	AGAGTTCTAAGGAGAGGAAGGAGCC	132748687	TCGTCGGCAGCGTCAGATGTGTATAAGAGACAG	gaaaacagggcttctttgcatccag	132748893	69℃	-	-
ConC31	#59	2	106453736	indel	ATG	A	0.038835		243	TCGTCGGCAGCGTCAGATGTGTATAAGAGACAG	AAATGATTTGGTTAGTACAGTGGTGC	106453650	GTCTCGTGGGCTCGGAGATGTGTATAAGAGACAG	catgtcttgttgtctgctgtcatgc	106453892	66℃	-	-
ConC31	#60	4	10302144	indel	TTG	T	0.0506329		287	TCGTCGGCAGCGTCAGATGTGTATAAGAGACAG	TGTTTGTTTGTGGGTTTGGTGGTAG	10302101	GTCTCGTGGGCTCGGAGATGTGTATAAGAGACAG	cccagaacccatataacagcaggac	10302387	69℃	-	-
ConC31	#61	5	137507964	indel	AGT	A	0.0338983		227	GTCTCGTGGGCTCGGAGATGTGTATAAGAGACAG	ctgaaaaCCAGTCAACCAACCAACC	137507846	TCGTCGGCAGCGTCAGATGTGTATAAGAGACAG	caggagtGGGCATCCCTGAATtatg	137508072	72℃	-	-
ConC31	#62	10	31906029	indel	T	TA	0.113636		268	TCGTCGGCAGCGTCAGATGTGTATAAGAGACAG	GCCAATCCTCTTACCCTATACAGAGC	31905985	GTCTCGTGGGCTCGGAGATGTGTATAAGAGACAG	AGGGTTTCCTCTTTCGTCTCATTGG	31906252	63℃	-	-
ConC31	#63	12	71367219	indel	TTG	T	0.0384615		280	GTCTCGTGGGCTCGGAGATGTGTATAAGAGACAG	TTGAGTGGAAAACTGGGGGTTTAGG	71367078	TCGTCGGCAGCGTCAGATGTGTATAAGAGACAG	TCACACTGGACCATTTTGGATCAGG	71367357	63℃	-	-
ConC31	#64	13	57896160	indel	GCA	G	0.047619		263	TCGTCGGCAGCGTCAGATGTGTATAAGAGACAG	ctctgtctctctctgcctctctctc	57896123	GTCTCGTGGGCTCGGAGATGTGTATAAGAGACAG	actcggctttaagagaagtggttgg	57896385	66℃	-	-
ConC31	#65	17	15711449	indel	GGT	G	0.0416667		209	GTCTCGTGGGCTCGGAGATGTGTATAAGAGACAG	AGGTTGAGTTTCCATCCTTAGCCAC	15711364	TCGTCGGCAGCGTCAGATGTGTATAAGAGACAG	gaaacagggtttctccgtatagccc	15711572	63℃	-	-
ConC31	#66	18	89624190	indel	AAC	A	0.036036		240	TCGTCGGCAGCGTCAGATGTGTATAAGAGACAG	AAGCTTTCCTTTGATCCCCCAAGAG	89624128	GTCTCGTGGGCTCGGAGATGTGTATAAGAGACAG	TGCTTACTTGAAAAATCACAGACACC	89624367	63℃	-	-
ConC31	#71	3	74485640	snp	C	A	0.0645161		297	GTCTCGTGGGCTCGGAGATGTGTATAAGAGACAG	GCAGCTTTGTGGCCTAGTATGTTTG	74485384	TCGTCGGCAGCGTCAGATGTGTATAAGAGACAG	taaggtcagacaagggtgaatggtg	74485680	63℃	-	-
ConC31	#72	3	136328074	snp	G	A	0.152941		274	GTCTCGTGGGCTCGGAGATGTGTATAAGAGACAG	ataaagtttgcaagaccaatgggcc	136327849	TCGTCGGCAGCGTCAGATGTGTATAAGAGACAG	AGAGCCTTCAGTTGGTCTAAGTTGC	136328122	69℃	-	-
ConC31	#80	10	44856767	snp	T	A	0.198473		278	GTCTCGTGGGCTCGGAGATGTGTATAAGAGACAG	accacactcaagaccaaattcccag	44856577	TCGTCGGCAGCGTCAGATGTGTATAAGAGACAG	GGACAAGAGTCTCCCCTTCAACTTG	44856854	66℃	-	-
ConC31	#85	14	27565350	snp	G	A	0.0588235		307	TCGTCGGCAGCGTCAGATGTGTATAAGAGACAG	atgttctctcagaaatgggcctgac	27565313	GTCTCGTGGGCTCGGAGATGTGTATAAGAGACAG	atgacccaagcatagctgttcagag	27565619	69℃	-	-
ConD31	#1	1	136327613	snp	C	T	0.0458015		255	GTCTCGTGGGCTCGGAGATGTGTATAAGAGACAG	tggaggcatttctcaactgaggttc	136327394	TCGTCGGCAGCGTCAGATGTGTATAAGAGACAG	GTTTAGAGCAATGCCTGACACAGAC	136327648	69℃	-	-
ConD31	#2	1	138873847	snp	G	C	0.0918367		259	TCGTCGGCAGCGTCAGATGTGTATAAGAGACAG	cctgcaagctctactggtccaatag	138873795	GTCTCGTGGGCTCGGAGATGTGTATAAGAGACAG	tgagggagggaggcacttatctatg	138874053	66℃	-	-
ConD31	#3	1	144262087	snp	T	C	0.038835		281	GTCTCGTGGGCTCGGAGATGTGTATAAGAGACAG	tgtgtgtgtggtgttgtgtCTTTTC	144261861	TCGTCGGCAGCGTCAGATGTGTATAAGAGACAG	cagaggtcctgagttcaattcccag	144262141	72℃	-	-
ConD31	#4	1	150165598	snp	G	A	0.354839		211	GTCTCGTGGGCTCGGAGATGTGTATAAGAGACAG	CGCCTTAGGTCCAGACAGCTTATTC	150165454	TCGTCGGCAGCGTCAGATGTGTATAAGAGACAG	AGGCTTTCACTTGAACTCAGGTCTG	150165664	66℃	-	-
ConD31	#5	2	56018049	snp	G	A	0.11236		262	TCGTCGGCAGCGTCAGATGTGTATAAGAGACAG	GCACTCAGAACTGATTGTCATGCAC	56017950	GTCTCGTGGGCTCGGAGATGTGTATAAGAGACAG	GTTCCCTCAAGAGTGATGCCTGATC	56018211	69℃	-	-
ConD31	#6	2	83290239	snp	C	G	0.397059		296	GTCTCGTGGGCTCGGAGATGTGTATAAGAGACAG	gaggattaggaggaggaggagaagg	83290018	TCGTCGGCAGCGTCAGATGTGTATAAGAGACAG	tagtactaggattacaggcaggccc	83290313	72℃	-	-
ConD31	#7	2	103040166	snp	T	C	0.0258065		298	TCGTCGGCAGCGTCAGATGTGTATAAGAGACAG	gcagaccgacactagaattgattacg	103040065	GTCTCGTGGGCTCGGAGATGTGTATAAGAGACAG	TCACCAGTCACATACATTTCCCAGG	103040362	66℃	-	-
ConD31	#8	2	111942370	snp	C	T	0.119403		295	GTCTCGTGGGCTCGGAGATGTGTATAAGAGACAG	ggagaaatgcctcagagatatgggc	111942215	TCGTCGGCAGCGTCAGATGTGTATAAGAGACAG	tctttgtttagctctgagccccatg	111942509	69℃	-	-
ConD31	#9	2	122725286	snp	T	G	0.0740741		222	GTCTCGTGGGCTCGGAGATGTGTATAAGAGACAG	GCAGCGTGAATGTAAAATCTGGGAC	122725114	TCGTCGGCAGCGTCAGATGTGTATAAGAGACAG	AGACATGTTCACCACTGACGTAACC	122725335	66℃	-	-
ConD31	#10	2	126883330	snp	A	T	0.4		285	TCGTCGGCAGCGTCAGATGTGTATAAGAGACAG	tttgaaggggaaactaggaaagggg	126883267	GTCTCGTGGGCTCGGAGATGTGTATAAGAGACAG	CTCCCACCACAGTAGCACAGAATTC	126883551	66℃	-	-
ConD31	#11	2	135155379	snp	C	T	0.0454545		289	GTCTCGTGGGCTCGGAGATGTGTATAAGAGACAG	gccttccattttctctgtgcaagtg	135155141	TCGTCGGCAGCGTCAGATGTGTATAAGAGACAG	ttctgcatttccaaccaactgctag	135155429	66℃	-	-
ConD31	#12	3	51357156	snp	C	G	0.4		224	TCGTCGGCAGCGTCAGATGTGTATAAGAGACAG	CAGATTGTGtgtggaggtcagttcc	51357062	GTCTCGTGGGCTCGGAGATGTGTATAAGAGACAG	TCATTCATCCTGTTTCCACCGGAAG	51357285	69℃	-	-
ConD31	#13	3	66473715	snp	G	T	0.040404		260	GTCTCGTGGGCTCGGAGATGTGTATAAGAGACAG	aggagtaggcttggtatttttgaggc	66473565	TCGTCGGCAGCGTCAGATGTGTATAAGAGACAG	tgagcaccatacccttgtttatggg	66473824	66℃	-	-
ConD31	#14	3	99914989	snp	A	T	0.0952381		208	GTCTCGTGGGCTCGGAGATGTGTATAAGAGACAG	TTGAAATCATCTAAGCTCCCAGCCC	99914819	TCGTCGGCAGCGTCAGATGTGTATAAGAGACAG	AACAAAGTCAGGAGAGGCCAGAAAC	99915026	72℃	-	-
ConD31	#15	3	109053695	snp	G	A	0.0392157		291	GTCTCGTGGGCTCGGAGATGTGTATAAGAGACAG	TTCTTGTttgttttggttgctgggg	109053497	TCGTCGGCAGCGTCAGATGTGTATAAGAGACAG	AATGTGAGTAAGGGTGTTGCTCTGG	109053787	72℃	-	-
ConD31	#16	3	138886740	snp	A	T	0.05		264	GTCTCGTGGGCTCGGAGATGTGTATAAGAGACAG	ttccaaaggactggagtttggttcc	138886607	TCGTCGGCAGCGTCAGATGTGTATAAGAGACAG	tgtcttcactctgctgtttccttgg	138886870	69℃	-	-
ConD31	#17	3	149287519	snp	G	A	0.039604		264	TCGTCGGCAGCGTCAGATGTGTATAAGAGACAG	agctgttatcttccccaagtccaac	149287399	GTCTCGTGGGCTCGGAGATGTGTATAAGAGACAG	GTGCCAAGTGCTGTTAAGGACATTG	149287662	69℃	-	-
ConD31	#18	4	50260090	snp	A	G	0.0338983		233	TCGTCGGCAGCGTCAGATGTGTATAAGAGACAG	CCCAAGAGTCTATTCACAGCTCAGC	50260051	GTCTCGTGGGCTCGGAGATGTGTATAAGAGACAG	ACATATCAGTGCAGTAGGACTCTGG	50260283	69℃	-	-
ConD31	#19	4	76849980	snp	C	T	0.154639		247	TCGTCGGCAGCGTCAGATGTGTATAAGAGACAG	GTAAGGTGCCTTGGTTTTGGACTTC	76849861	GTCTCGTGGGCTCGGAGATGTGTATAAGAGACAG	gtaacagcagccatggatgaaaacc	76850107	69℃	-	-
ConD31	#20	4	88430829	snp	T	G	0.059322		291	GTCTCGTGGGCTCGGAGATGTGTATAAGAGACAG	TGGATGTCAGTTTTGGAGTGGCTAC	88430623	TCGTCGGCAGCGTCAGATGTGTATAAGAGACAG	AGCTCACTAGAAGGGGAAGTTAGGG	88430913	66℃	-	-
ConD31	#21	4	117318438	snp	A	G	0.0704225		259	TCGTCGGCAGCGTCAGATGTGTATAAGAGACAG	ACACACCAATGAAATCCTCTCCACC	117318333	GTCTCGTGGGCTCGGAGATGTGTATAAGAGACAG	CACAGTGGTGGGAGTTAGAGACATG	117318591	69℃	-	-
ConD31	#22	4	135452915	snp	G	A	0.0487805		214	TCGTCGGCAGCGTCAGATGTGTATAAGAGACAG	CCCCATCGAGGAAATAAAGAGGGTG	135452841	GTCTCGTGGGCTCGGAGATGTGTATAAGAGACAG	CAACAGCAACAACAGCAACAAAACC	135453054	66℃	-	-
ConD31	#23	5	5616083	snp	A	G	0.0373832		312	GTCTCGTGGGCTCGGAGATGTGTATAAGAGACAG	ATGAGATAGCATTTTCCTTTTTGCCTTGG	5615886	TCGTCGGCAGCGTCAGATGTGTATAAGAGACAG	CATTTTCATTACATCAGCAGTAGCCAGAC	5616197	66℃	-	-
ConD31	#24	5	19185810	snp	A	T	0.0333333		248	GTCTCGTGGGCTCGGAGATGTGTATAAGAGACAG	AGCTGCTAAAACTGAGTATGAGAACCC	19185646	TCGTCGGCAGCGTCAGATGTGTATAAGAGACAG	CTATGGAGGAATGGGCCACTCTTG	19185893	66℃	-	-
ConD31	#25	5	20399869	snp	T	C	0.118812		340	GTCTCGTGGGCTCGGAGATGTGTATAAGAGACAG	TTATCTTAGTTAGCCCTTCTCACCTCCTC	20399663	TCGTCGGCAGCGTCAGATGTGTATAAGAGACAG	gagGATACCCAGagatagataggggaaag	20400002	69℃	-	-
ConD31	#26	5	58458295	snp	C	A	0.0366972		295	TCGTCGGCAGCGTCAGATGTGTATAAGAGACAG	TTTCAAGCCACACCAAGGAATTCTC	58458258	GTCTCGTGGGCTCGGAGATGTGTATAAGAGACAG	AGATGACAAACCTGCCTGATTGGAC	58458552	66℃	-	-
ConD31	#27	6	16747920	snp	G	T	0.028777		200	GTCTCGTGGGCTCGGAGATGTGTATAAGAGACAG	ATCGTCTCCCATTCTCTTTTGCCTC	16747809	TCGTCGGCAGCGTCAGATGTGTATAAGAGACAG	attgaggaggggaaactgggatagg	16748008	69℃	-	-
ConD31	#28	6	34331719	snp	C	T	0.113924		209	GTCTCGTGGGCTCGGAGATGTGTATAAGAGACAG	GCCAAAGGAGAGCAAGAAAAGGAAC	34331580	TCGTCGGCAGCGTCAGATGTGTATAAGAGACAG	tgtgacgatgtgtgagaatggtcag	34331788	66℃	-	-
ConD31	#29	6	74398281	snp	T	G	0.12381		269	TCGTCGGCAGCGTCAGATGTGTATAAGAGACAG	tgttgagacaatccACGGAGATTAC	74398161	GTCTCGTGGGCTCGGAGATGTGTATAAGAGACAG	TGACTAAGAGTGAAGAGGCTGTTGC	74398429	66℃	-	-
ConD31	#30	6	108196869	snp	A	G	0.0444444		241	TCGTCGGCAGCGTCAGATGTGTATAAGAGACAG	tggacctccttatctcttctgcctc	108196825	GTCTCGTGGGCTCGGAGATGTGTATAAGAGACAG	TGATTGACAGTTCCGGTCTTCACAG	108197065	69℃	-	-
ConD31	#31	7	115118470	snp	C	T	0.105691		239	TCGTCGGCAGCGTCAGATGTGTATAAGAGACAG	TCGTGAGCCTTCTAGACCCTGTATC	115118361	GTCTCGTGGGCTCGGAGATGTGTATAAGAGACAG	TTTGCTGGGTCCAGAGTGATGAAAG	115118599	69℃	-	-
ConD31	#32	8	14901273	snp	C	T	0.0687023		263	TCGTCGGCAGCGTCAGATGTGTATAAGAGACAG	CAGGAAGAAGCCAGAGCCATCTATG	14901191	GTCTCGTGGGCTCGGAGATGTGTATAAGAGACAG	ctgagctctctctctaacccTAGGC	14901453	66℃	-	-
ConD31	#33	8	60776001	snp	G	T	0.0555556		251	GTCTCGTGGGCTCGGAGATGTGTATAAGAGACAG	CCAAGGTTTCCTGTGGTAGAACTCC	60775787	TCGTCGGCAGCGTCAGATGTGTATAAGAGACAG	AGCCAGCTTCCCTAATTCTGATGAC	60776037	66℃	-	-
ConD31	#34	9	56019324	snp	G	A	0.0507246		208	TCGTCGGCAGCGTCAGATGTGTATAAGAGACAG	aaattcctaggcagatggttggacg	56019235	GTCTCGTGGGCTCGGAGATGTGTATAAGAGACAG	ttctaagaaggggcaaagtgtccac	56019442	72℃	-	-
ConD31	#35	10	96794416	snp	C	T	0.12605		227	GTCTCGTGGGCTCGGAGATGTGTATAAGAGACAG	atgccatcatgtcctccctttcttc	96794284	TCGTCGGCAGCGTCAGATGTGTATAAGAGACAG	ctctcatgaggcctcaacatcagac	96794510	66℃	-	-
ConD31	#36	10	107997189	snp	A	G	0.0377358		212	GTCTCGTGGGCTCGGAGATGTGTATAAGAGACAG	gagttccagtcctgacttcctttgg	107997038	TCGTCGGCAGCGTCAGATGTGTATAAGAGACAG	tcatggctaacagcattgtacctgg	107997249	69℃	-	-
ConD31	#37	11	36086105	snp	C	T	0.0853659		280	TCGTCGGCAGCGTCAGATGTGTATAAGAGACAG	GTGGGAAGAAGAACAGAGACACTCG	36086022	GTCTCGTGGGCTCGGAGATGTGTATAAGAGACAG	tgcagacatacataaaggactggcc	36086301	66℃	-	-
ConD31	#38	12	10183123	snp	C	T	0.378378		227	TCGTCGGCAGCGTCAGATGTGTATAAGAGACAG	TTTCCTAAGGCGAAACAGAAGGACC	10183062	GTCTCGTGGGCTCGGAGATGTGTATAAGAGACAG	TTTCTTGGGCTTCTCTTTCTGGACC	10183288	69℃	-	-
ConD31	#39	12	34577688	snp	G	A	0.0521739		214	GTCTCGTGGGCTCGGAGATGTGTATAAGAGACAG	agtagctgagagtttgcaactgatcc	34577574	TCGTCGGCAGCGTCAGATGTGTATAAGAGACAG	catgcttgcctctctctcatctctc	34577787	69℃	-	-
ConD31	#40	13	87764913	snp	T	C	0.0298507		235	GTCTCGTGGGCTCGGAGATGTGTATAAGAGACAG	gcttctggttttgggatttgactgg	87764729	TCGTCGGCAGCGTCAGATGTGTATAAGAGACAG	attcttcccttccattccatctgtc	87764963	66℃	-	-
ConD31	#41	13	96273179	snp	G	T	0.25		220	GTCTCGTGGGCTCGGAGATGTGTATAAGAGACAG	gatgatttatcaggggcctcatccc	96273019	TCGTCGGCAGCGTCAGATGTGTATAAGAGACAG	caggatgtcataatggagggttggg	96273238	72℃	-	-
ConD31	#42	14	70679080	snp	G	A	0.401961		264	TCGTCGGCAGCGTCAGATGTGTATAAGAGACAG	tacattctgtagcacacacccacac	70679021	GTCTCGTGGGCTCGGAGATGTGTATAAGAGACAG	ccctggagctttctctgtaaaccag	70679284	69℃	-	-
ConD31	#43	14	103141831	snp	G	T	0.0392157		237	TCGTCGGCAGCGTCAGATGTGTATAAGAGACAG	TCATAGTCAGAAGTGAAACCGTGCC	103141758	GTCTCGTGGGCTCGGAGATGTGTATAAGAGACAG	AAACACATCAGTCCCCTCTTCAAGC	103141994	69℃	-	-
ConD31	#44	15	5485823	snp	G	A	0.134831		297	GTCTCGTGGGCTCGGAGATGTGTATAAGAGACAG	gctctacaaggcagtgatctgtgag	5485562	TCGTCGGCAGCGTCAGATGTGTATAAGAGACAG	cccctcccactttatcctcccattc	5485858	66℃	-	-
ConD31	#45	15	30653664	snp	T	G	0.0357143		215	GTCTCGTGGGCTCGGAGATGTGTATAAGAGACAG	GGGGTGTTCTCACTGTAAAGACCAG	30653507	TCGTCGGCAGCGTCAGATGTGTATAAGAGACAG	TTGCTACTGTAAAGTGGAGGTGCTG	30653721	69℃	-	-
ConD31	#46	15	41354477	snp	A	T	0.4		218	TCGTCGGCAGCGTCAGATGTGTATAAGAGACAG	TCTTTAGCAAAGCCTGTACCTCGTG	41354417	GTCTCGTGGGCTCGGAGATGTGTATAAGAGACAG	ctttgtgttGCCTTCCATAACTGCG	41354634	69℃	-	-
ConD31	#47	15	41354478	snp	C	T	0.4		218	TCGTCGGCAGCGTCAGATGTGTATAAGAGACAG	TCTTTAGCAAAGCCTGTACCTCGTG	41354417	GTCTCGTGGGCTCGGAGATGTGTATAAGAGACAG	ctttgtgttGCCTTCCATAACTGCG	41354634	69℃	-	-
ConD31	#48	15	52615284	snp	C	G	0.0519481		282	GTCTCGTGGGCTCGGAGATGTGTATAAGAGACAG	CACTAGTGGTGCCTTATCAGAACCC	52615085	TCGTCGGCAGCGTCAGATGTGTATAAGAGACAG	ACTCGGGATAAGACATGTTACGAAC	52615366	69℃	-	-
ConD31	#49	15	94775216	snp	G	T	0.0449438		220	TCGTCGGCAGCGTCAGATGTGTATAAGAGACAG	gtgggcgctgggaacaaatattttg	94775171	GTCTCGTGGGCTCGGAGATGTGTATAAGAGACAG	taaactgacctaccatggcttccac	94775390	66℃	-	-
ConD31	#50	15	98890966	snp	C	A	0.162162		261	TCGTCGGCAGCGTCAGATGTGTATAAGAGACAG	tcctggaagtcactctgtagaccag	98890904	GTCTCGTGGGCTCGGAGATGTGTATAAGAGACAG	ATTTAAAATCAGACGCACGCACGAC	98891164	72℃	-	-
ConD31	#51	16	39992189	snp	G	T	0.0454545		283	GTCTCGTGGGCTCGGAGATGTGTATAAGAGACAG	AGTTGCTGTAAAGGGAAAGGGTGAG	39992034	TCGTCGGCAGCGTCAGATGTGTATAAGAGACAG	TCTGCCCTCAGTTGTAAGGAAACAC	39992316	66℃	-	-
ConD31	#52	16	41924133	snp	C	T	0.109375		285	TCGTCGGCAGCGTCAGATGTGTATAAGAGACAG	ATCTCTGGGCAAGGAGAAGAAATGC	41924076	GTCTCGTGGGCTCGGAGATGTGTATAAGAGACAG	AAACCTCCTCAACTGGCTCTTTCTC	41924360	66℃	-	-
ConD31	#53	17	13238705	snp	C	T	0.256281		295	TCGTCGGCAGCGTCAGATGTGTATAAGAGACAG	gagcaaggaatcaggagctgtcatg	13238657	GTCTCGTGGGCTCGGAGATGTGTATAAGAGACAG	TGAACTCAGGGCTTAATGGCAAGAG	13238951	72℃	-	-
ConD31	#54	17	40193064	snp	T	A	0.0505051		302	GTCTCGTGGGCTCGGAGATGTGTATAAGAGACAG	tcacccctgagtttgattatttccttcag	40192803	TCGTCGGCAGCGTCAGATGTGTATAAGAGACAG	ccaacattcacgtggaaactgaacaatac	40193104	69℃	-	-
ConD31	#55	17	55935469	snp	G	C	0.0380952		258	TCGTCGGCAGCGTCAGATGTGTATAAGAGACAG	tgtaaaattagactgtgggtgtgcc	55935390	GTCTCGTGGGCTCGGAGATGTGTATAAGAGACAG	TGACTGTAAAATTTCAGACGGGGGC	55935647	72℃	-	-
ConD31	#56	17	64929799	snp	G	A	0.112676		339	GTCTCGTGGGCTCGGAGATGTGTATAAGAGACAG	tccgttagtgggcagataaaatcgtatac	64929557	TCGTCGGCAGCGTCAGATGTGTATAAGAGACAG	aggactcctttcctttctaaggtcaaatg	64929895	66℃	-	-
ConD31	#57	18	39315000	snp	C	T	0.0875		297	TCGTCGGCAGCGTCAGATGTGTATAAGAGACAG	CTTCCTTGGACAGAGTATCAAGCCC	39314957	GTCTCGTGGGCTCGGAGATGTGTATAAGAGACAG	TCATGTAAGTCAGGTAACCGCATGC	39315253	66℃	-	-
ConD31	#58	18	66993284	snp	G	T	0.0694444		229	GTCTCGTGGGCTCGGAGATGTGTATAAGAGACAG	ATGGAGGAGGGAGTACAGATGTGTG	66993141	TCGTCGGCAGCGTCAGATGTGTATAAGAGACAG	GTTGTTAGAGCCAAATGTGCACAGG	66993369	69℃	-	-
ConD31	#59	19	14987098	snp	A	G	0.0322581		216	GTCTCGTGGGCTCGGAGATGTGTATAAGAGACAG	caacgaattagaaagggcaatcggc	14986982	TCGTCGGCAGCGTCAGATGTGTATAAGAGACAG	tgggttcatttctgggcttcaattc	14987197	72℃	-	-
ConD31	#60	X	11081028	snp	C	T	0.0784314		263	TCGTCGGCAGCGTCAGATGTGTATAAGAGACAG	GCAGAGAGGTGAGTGGAATCTTCTG	11080937	GTCTCGTGGGCTCGGAGATGTGTATAAGAGACAG	GGGGAGGGGAAACAATATCCAAGAC	11081199	66℃	-	-
ConD31	#61	1	133954268	indel	T	TC	0.397727		252	GTCTCGTGGGCTCGGAGATGTGTATAAGAGACAG	GGACAGAGTAGGAAGGGAGATAGCC	133954125	TCGTCGGCAGCGTCAGATGTGTATAAGAGACAG	accactgtgaaaagggtcatctgac	133954376	66℃	KAPA HiFi HS ReadyMix	-
ConD31	#62	4	136436317	indel	TCA	T	0.0470588		305	TCGTCGGCAGCGTCAGATGTGTATAAGAGACAG	CCAGCTTTTATAATTTGAGTGGTTGGACC	136436226	GTCTCGTGGGCTCGGAGATGTGTATAAGAGACAG	GAGCACTTTCCATTTTATAAAAGGCCTCC	136436530	66℃	-	-
ConD31	#63	6	13940241	indel	GTA	G	0.0561798		285	GTCTCGTGGGCTCGGAGATGTGTATAAGAGACAG	ctactcattgtcactccatgccctc	13940074	TCGTCGGCAGCGTCAGATGTGTATAAGAGACAG	TGGATATTGTGCATCCTAGGCCAAC	13940358	69℃	-	-
ConD31	#64	6	52505771	indel	TC	T	0.0336134		300	GTCTCGTGGGCTCGGAGATGTGTATAAGAGACAG	CTTAAGGCATTTTACCCTCTAAATCCTTC	52505548	TCGTCGGCAGCGTCAGATGTGTATAAGAGACAG	AAAGCTCCATTGGAAGAGTGACAGC	52505847	66℃	-	-
ConD31	#65	7	110222112	indel	TC	T	0.0481928		289	TCGTCGGCAGCGTCAGATGTGTATAAGAGACAG	GTCCTCACTCTTCCTCAGGCCTC	110222000	GTCTCGTGGGCTCGGAGATGTGTATAAGAGACAG	TGAGGAGGACTCTGCAAAAGCAATG	110222288	66℃	KAPA HiFi HS ReadyMix	-
ConD31	#66	9	29134960	indel	CTA	C	0.036036		286	TCGTCGGCAGCGTCAGATGTGTATAAGAGACAG	TCCTGTTTTGGGGGTTTGCATTTTC	29134840	GTCTCGTGGGCTCGGAGATGTGTATAAGAGACAG	AATGTAGCTGGGTGTTGAGACCTTC	29135125	69℃	-	-
ConD31	#67	9	38429079	indel	CTA	C	0.036036		284	TCGTCGGCAGCGTCAGATGTGTATAAGAGACAG	ttcataactcccctaggtgcacaac	38428972	GTCTCGTGGGCTCGGAGATGTGTATAAGAGACAG	AAATTGGCTTCATGAAATCACACCG	38429255	69℃	-	-
ConD31	#68	10	68105148	indel	ATG	A	0.0380952		296	GTCTCGTGGGCTCGGAGATGTGTATAAGAGACAG	CATTTTGACTCAACTTAGCAGCGGG	68104949	TCGTCGGCAGCGTCAGATGTGTATAAGAGACAG	GCCTTTCTCTCTCCTTCTGAGCAAC	68105244	69℃	-	-
ConD31	#69	10	123331493	indel	GAT	G	0.0512821		255	GTCTCGTGGGCTCGGAGATGTGTATAAGAGACAG	tgtctgtaccagatgggattacccc	123331377	TCGTCGGCAGCGTCAGATGTGTATAAGAGACAG	gtgtttgtgtctgtttgtcactccg	123331631	66℃	-	-
ConD31	#70	12	11138036	indel	TAG	T	0.0555556		231	GTCTCGTGGGCTCGGAGATGTGTATAAGAGACAG	tctcttaggtggggaggttacaagg	11137907	TCGTCGGCAGCGTCAGATGTGTATAAGAGACAG	accctggcacatcaaatctctTCTC	11138137	66℃	-	-
ConD31	#71	14	39935542	indel	CTG	C	0.0493827		274	GTCTCGTGGGCTCGGAGATGTGTATAAGAGACAG	AGACTAGGGAAGTGTGACAAAGCTG	39935321	TCGTCGGCAGCGTCAGATGTGTATAAGAGACAG	CTTCACCCCACTTGGACATGGac	39935594	66℃	-	-
ConD31	#72	1	48415014	snp	C	T	0.102941		249	GTCTCGTGGGCTCGGAGATGTGTATAAGAGACAG	cactaagagaacgcaaatgacagcc	48414839	TCGTCGGCAGCGTCAGATGTGTATAAGAGACAG	agttggcattctgttcttgtgtctg	48415087	72℃	-	-
ConD31	#73	2	64414025	snp	T	C	0.0566038		288	TCGTCGGCAGCGTCAGATGTGTATAAGAGACAG	AGATCTTTAGAAGGTGTCACACTGTGTTG	64413968	GTCTCGTGGGCTCGGAGATGTGTATAAGAGACAG	TTCCCCCTTCATTTTGTATTTAGGATCCC	64414255	66℃	-	-
ConD31	#74	4	135416708	snp	T	A	0.0555556		266	GTCTCGTGGGCTCGGAGATGTGTATAAGAGACAG	TTCCTCTTCAGTTTCGCTCTCACAG	135416516	TCGTCGGCAGCGTCAGATGTGTATAAGAGACAG	attagagttcaaggtcagcctcagc	135416781	66℃	-	-
ConD31	#75	6	100490799	snp	T	C	0.0508475		278	GTCTCGTGGGCTCGGAGATGTGTATAAGAGACAG	tagggttgtgtctgtgtgtggaaag	100490568	TCGTCGGCAGCGTCAGATGTGTATAAGAGACAG	ccttggtcttggtgtctcttcacag	100490845	66℃	-	-
ConD31	#76	7	5650260	snp	C	T	0.0508475		223	TCGTCGGCAGCGTCAGATGTGTATAAGAGACAG	aggctcacaaacaaccagcaatttc	5650172	GTCTCGTGGGCTCGGAGATGTGTATAAGAGACAG	GGAACCACATGTTAACATAGAGAGGC	5650394	66℃	-	-
ConD31	#77	7	112347934	snp	G	T	0.0508475		245	GTCTCGTGGGCTCGGAGATGTGTATAAGAGACAG	GCTAAGTGGCCTATCAGAGCTCATC	112347801	TCGTCGGCAGCGTCAGATGTGTATAAGAGACAG	ctggagagatggctcagcagttaag	112348045	72℃	-	-
ConD31	#78	7	132205273	snp	C	T	0.0508475		308	TCGTCGGCAGCGTCAGATGTGTATAAGAGACAG	CTCCACCACTAATTGCACTAATTGTTCAC	132205197	GTCTCGTGGGCTCGGAGATGTGTATAAGAGACAG	gactatacagagaaaccctgtctcgaaac	132205504	66℃	-	-
ConD31	#79	8	108710104	snp	G	T	0.0526316		239	TCGTCGGCAGCGTCAGATGTGTATAAGAGACAG	CAGTCATTAGGAAGTTCCCTGAGCC	108709993	GTCTCGTGGGCTCGGAGATGTGTATAAGAGACAG	CGCATTGACAATAACCATGAGCAGG	108710231	66℃	-	-
ConD31	#80	8	124989720	snp	G	A	0.0526316		274	GTCTCGTGGGCTCGGAGATGTGTATAAGAGACAG	TTGGGAAGAAAATAAAGGGGGTGGG	124989510	TCGTCGGCAGCGTCAGATGTGTATAAGAGACAG	cagacattttgtgagctgctgtgtg	124989783	72℃	-	-
ConD31	#81	11	117236614	snp	A	G	0.0545455		221	TCGTCGGCAGCGTCAGATGTGTATAAGAGACAG	gtggaggtcagaggacaacttgaag	117236526	GTCTCGTGGGCTCGGAGATGTGTATAAGAGACAG	TCTGGTACTCTCACACCCCATATCC	117236746	66℃	-	-
ConD31	#82	X	13154706	snp	C	T	0.0566038		210	TCGTCGGCAGCGTCAGATGTGTATAAGAGACAG	TCCATTGGAACTTCTCTCTTCAAGGG	13154590	GTCTCGTGGGCTCGGAGATGTGTATAAGAGACAG	TCTCATGCCTCAAAACCTACAGTGG	13154799	66℃	-	-
ConD31	#83	X	17687208	snp	A	G	0.0545455		287	TCGTCGGCAGCGTCAGATGTGTATAAGAGACAG	gccttttaatggctgtgagacccac	17687157	GTCTCGTGGGCTCGGAGATGTGTATAAGAGACAG	caacttgatatcctcctgcctcagc	17687443	69℃	-	-
ConD31	#84	X	52577255	snp	A	G	0.0508475		288	GTCTCGTGGGCTCGGAGATGTGTATAAGAGACAG	TCACTCATGGTCAGGGTTTGTGTTC	52577080	TCGTCGGCAGCGTCAGATGTGTATAAGAGACAG	AATTTCGGTTTTGGTGATGTGCTGG	52577367	66℃	-	-
ConD31	#85	X	160518676	snp	C	A	0.0526316		244	TCGTCGGCAGCGTCAGATGTGTATAAGAGACAG	TAGCTAACGGAAGAGCAAATCCAGC	160518587	GTCTCGTGGGCTCGGAGATGTGTATAAGAGACAG	ACCAATTTCAGCTCTGTATCTCAACAC	160518830	66℃	-	-
ConD31	#86	11	6527640	indel	CA	C	0.0540541		294	GTCTCGTGGGCTCGGAGATGTGTATAAGAGACAG	ACAGCAGCCAGATTTCTACCATCTG	6527407	TCGTCGGCAGCGTCAGATGTGTATAAGAGACAG	TGGGTCTCCGGTGTTGAAGTAAAAC	6527700	66℃	-	-
ConE29	#1	1	25345165	snp	G	A	0.176991		231	TCGTCGGCAGCGTCAGATGTGTATAAGAGACAG	GCATGTCATAGGCACATTAGCAAGC	25345072	GTCTCGTGGGCTCGGAGATGTGTATAAGAGACAG	TCTAGCCTCGAGTGGGATTAAGGAG	25345302	63℃	-	-
ConE29	#2	1	45849251	snp	G	T	0.0462963		297	GTCTCGTGGGCTCGGAGATGTGTATAAGAGACAG	tgaaagacagacacaccctaagcac	45849079	TCGTCGGCAGCGTCAGATGTGTATAAGAGACAG	actctgacaggcttgttcaactcag	45849375	60℃	-	-
ConE29	#3	1	99352116	snp	G	A	0.242424		222	TCGTCGGCAGCGTCAGATGTGTATAAGAGACAG	CAATGCTTGCATTCCCAGTTTTGTG	99352026	GTCTCGTGGGCTCGGAGATGTGTATAAGAGACAG	ACTGGTGTCACTGTATGTTCActctg	99352247	60℃	-	-
ConE29	#4	1	148901472	snp	T	G	0.0322581		243	TCGTCGGCAGCGTCAGATGTGTATAAGAGACAG	GGAGAGAAGTTTTGGTCAgtggagc	148901410	GTCTCGTGGGCTCGGAGATGTGTATAAGAGACAG	tctcagatggccaccaatgaaagac	148901652	72℃	-	-
ConE29	#5	2	37992414	snp	A	G	0.030303		290	TCGTCGGCAGCGTCAGATGTGTATAAGAGACAG	CTTCTTTGCAGCAGCTATGAAAGGC	37992323	GTCTCGTGGGCTCGGAGATGTGTATAAGAGACAG	AGAAGATAGACTCCCTTCTGCCTCC	37992612	66℃	-	-
ConE29	#6	2	64080077	snp	G	A	0.383721		215	GTCTCGTGGGCTCGGAGATGTGTATAAGAGACAG	AGCAAACACGTCTCTCAGTATAGCG	64079919	TCGTCGGCAGCGTCAGATGTGTATAAGAGACAG	TGGATTTAAAAGAAAGGGGCCCAGG	64080133	63℃	-	-
ConE29	#7	2	165324579	snp	T	C	0.060241		261	TCGTCGGCAGCGTCAGATGTGTATAAGAGACAG	ACCTCATGGAGAAAACTCCCTTGTG	165324530	GTCTCGTGGGCTCGGAGATGTGTATAAGAGACAG	atacaggagttcaaaaccagcctgg	165324790	66℃	-	-
ConE29	#8	2	178525015	snp	C	T	0.176471		239	GTCTCGTGGGCTCGGAGATGTGTATAAGAGACAG	tcctgcaagttaccctctatcctcc	178524857	TCGTCGGCAGCGTCAGATGTGTATAAGAGACAG	TGAGTACTCTTCCCCACTGTGCTTC	178525095	66℃	-	-
ConE29	#9	3	13523218	snp	A	T	0.0659341		235	GTCTCGTGGGCTCGGAGATGTGTATAAGAGACAG	gcttgctcttctgtcccttgtagag	13523030	TCGTCGGCAGCGTCAGATGTGTATAAGAGACAG	actacaacccagaaatggaggacac	13523264	63℃	-	-
ConE29	#10	3	76456627	snp	C	T	0.122807		296	TCGTCGGCAGCGTCAGATGTGTATAAGAGACAG	TGATTTTATGAAAATTCCCAACATGCACAC	76456585	GTCTCGTGGGCTCGGAGATGTGTATAAGAGACAG	ACTAAGCCTGACAAAAGAATAGGGAgttc	76456880	60℃	-	-
ConE29	#11	3	78125220	snp	G	A	0.403509		278	TCGTCGGCAGCGTCAGATGTGTATAAGAGACAG	cctaggttttctgtccagggttgtc	78125146	GTCTCGTGGGCTCGGAGATGTGTATAAGAGACAG	tgagtcctaaataccccctcacctg	78125423	66℃	-	-
ConE29	#12	3	119354358	Multi	C	A	0.0561798		316	GTCTCGTGGGCTCGGAGATGTGTATAAGAGACAG	TAATGTGAATTGGGAAGTCTGTCTCTGTC	119354142	TCGTCGGCAGCGTCAGATGTGTATAAGAGACAG	GAAAGATTGACAAAGAGGATCATGGTGTG	119354457	69℃	-	yes
ConE29	#12	3	119354359	Multi	C	T	0.0561798
ConE29	#12	3	119354360	Multi	T	A	0.0561798
ConE29	#14	4	141207551	snp	A	G	0.0373832		270	GTCTCGTGGGCTCGGAGATGTGTATAAGAGACAG	ATAAACAGCAAAGCAGAGAGGGGTG	141207317	TCGTCGGCAGCGTCAGATGTGTATAAGAGACAG	AGACACACATGAAATAAggggctgg	141207586	66℃	-	-
ConE29	#15	5	55107459	snp	G	A	0.0609756		313	GTCTCGTGGGCTCGGAGATGTGTATAAGAGACAG	ACTCAATATTTTGGAACCATGTGGTGC	55107283	TCGTCGGCAGCGTCAGATGTGTATAAGAGACAG	AGATCTTAGTAAAATGCCTGGGCTGG	55107595	66℃	-	-
ConE29	#17	5	87260846	snp	C	T	0.0490196		245	GTCTCGTGGGCTCGGAGATGTGTATAAGAGACAG	ctgaccaagtatgtttcatcccggg	87260698	TCGTCGGCAGCGTCAGATGTGTATAAGAGACAG	gttgatgttggctactggtttgctg	87260942	72℃	-	-
ConE29	#18	6	56146478	snp	T	A	0.0350877		289	TCGTCGGCAGCGTCAGATGTGTATAAGAGACAG	TTTGGCTGAAAGTAAAATGCGAGCG	56146410	GTCTCGTGGGCTCGGAGATGTGTATAAGAGACAG	GTTTGTTTACTTGTGGGAAGCTCGC	56146698	63℃	-	-
ConE29	#19	6	62354930	snp	C	A	0.361446		294	GTCTCGTGGGCTCGGAGATGTGTATAAGAGACAG	CCTTGTCTAGAGGGAAGAATGCAGG	62354711	TCGTCGGCAGCGTCAGATGTGTATAAGAGACAG	atcactggaaagagaggcccatttg	62355004	66℃	-	-
ConE29	#20	6	125700572	snp	C	T	0.30303		296	TCGTCGGCAGCGTCAGATGTGTATAAGAGACAG	gaccgggtagggaacttgttttcag	125700517	GTCTCGTGGGCTCGGAGATGTGTATAAGAGACAG	CAAACATCTCCTGTCTCTGACCACC	125700812	66℃	-	-
ConE29	#21	6	129447258	snp	T	A	0.039604		296	GTCTCGTGGGCTCGGAGATGTGTATAAGAGACAG	GATGCATTCATTGTGCTTAGCCCTG	129447043	TCGTCGGCAGCGTCAGATGTGTATAAGAGACAG	GGCTTTTCCACTGTGTGAATGACAG	129447338	63℃	-	-
ConE29	#22	6	135443495	snp	C	T	0.0506329		246	TCGTCGGCAGCGTCAGATGTGTATAAGAGACAG	ttagtatcacgcatgtctgcttccc	135443417	GTCTCGTGGGCTCGGAGATGTGTATAAGAGACAG	AGGCACCAAGGGAGAAATAATGGAC	135443662	60℃	-	-
ConE29	#23	7	64551510	snp	A	T	0.366667		257	GTCTCGTGGGCTCGGAGATGTGTATAAGAGACAG	TACTTTTAGCCCCAGGGACACATTG	64551318	TCGTCGGCAGCGTCAGATGTGTATAAGAGACAG	ATTGACTGGACACTCACTAAGCAGC	64551574	63℃	-	-
ConE29	#24	7	71611779	snp	T	G	0.37234		266	TCGTCGGCAGCGTCAGATGTGTATAAGAGACAG	AAGGAGAGGGGTGTTATAGGAGCAG	71611741	GTCTCGTGGGCTCGGAGATGTGTATAAGAGACAG	ACATTGGATCAGAAGAGACAGCCAC	71612006	63℃	-	-
ConE29	#25	9	58222237	snp	C	T	0.135417		282	GTCTCGTGGGCTCGGAGATGTGTATAAGAGACAG	CAAATGTGTATGCAGGTGTGAACCG	58222037	TCGTCGGCAGCGTCAGATGTGTATAAGAGACAG	tcttatacacccaaagaccgtgtgc	58222318	63℃	-	-
ConE29	#26	10	28977291	snp	G	T	0.108696		250	GTCTCGTGGGCTCGGAGATGTGTATAAGAGACAG	aggaggggaaaagtgaaccatgttc	28977080	TCGTCGGCAGCGTCAGATGTGTATAAGAGACAG	gatgatgccctttctactggaggtg	28977329	63℃	-	-
ConE29	#27	10	39087487	snp	G	A	0.0985915		290	TCGTCGGCAGCGTCAGATGTGTATAAGAGACAG	CCTCACTTCTTATACTTCCCCGCAG	39087395	GTCTCGTGGGCTCGGAGATGTGTATAAGAGACAG	TTCACCAAGTAGTGTAGGCATGCAC	39087684	63℃	-	-
ConE29	#28	10	74068152	snp	T	A	0.0377358		218	TCGTCGGCAGCGTCAGATGTGTATAAGAGACAG	ATCACCACAGCTAGAAGGCTAATAC	74068101	GTCTCGTGGGCTCGGAGATGTGTATAAGAGACAG	GATAAGAGCACACAGAAGGGAGGTG	74068318	63℃	-	-
ConE29	#29	11	44432732	snp	G	A	0.4		237	GTCTCGTGGGCTCGGAGATGTGTATAAGAGACAG	GTCGCTTTGAATTCCTTCTTTGGGC	44432602	TCGTCGGCAGCGTCAGATGTGTATAAGAGACAG	CCTCACTAATGATGACAGCTCCAGG	44432838	60℃	-	-
ConE29	#30	12	5264106	snp	G	A	0.0416667		206	TCGTCGGCAGCGTCAGATGTGTATAAGAGACAG	TTTCCCCTACATGCTGCCTTTAACC	5264014	GTCTCGTGGGCTCGGAGATGTGTATAAGAGACAG	GAGGGGTAGAAAGCCTAAAAGCCAG	5264219	72℃	-	-
ConE29	#31	13	98726073	snp	G	A	0.320755		222	TCGTCGGCAGCGTCAGATGTGTATAAGAGACAG	AAACTGCTAGAGCACCAGTGTTCTC	98726015	GTCTCGTGGGCTCGGAGATGTGTATAAGAGACAG	TTTCTTTGCAGGTTCTGGATCCCTC	98726236	63℃	-	-
ConE29	#32	13	114638313	snp	T	G	0.178571		349	GTCTCGTGGGCTCGGAGATGTGTATAAGAGACAG	AAGACAATCAAAAGATAAGCTGGATAGATC	114638036	TCGTCGGCAGCGTCAGATGTGTATAAGAGACAG	CACTATCTCCTATATGTCAAGCATTATGC	114638384	60℃	-	-
ConE29	#33	14	46535464	snp	T	A	0.112069		287	TCGTCGGCAGCGTCAGATGTGTATAAGAGACAG	AAACTACCCCAGGCTTACGAAAAGG	46535391	GTCTCGTGGGCTCGGAGATGTGTATAAGAGACAG	ATCGGAAGTCCTTAAAAGGGAAGCC	46535677	72℃	-	-
ConE29	#34	15	52716246	snp	A	T	0.045977		270	GTCTCGTGGGCTCGGAGATGTGTATAAGAGACAG	AATGGGATTGCTTTGACTCTGTTGG	52716046	TCGTCGGCAGCGTCAGATGTGTATAAGAGACAG	actgttatctgtgcaaaaatgaggg	52716315	60℃	-	-
ConE29	#35	17	61160293	snp	C	A	0.376471		264	GTCTCGTGGGCTCGGAGATGTGTATAAGAGACAG	TTGAGGCATATGGAGCTTTAACCAG	61160078	TCGTCGGCAGCGTCAGATGTGTATAAGAGACAG	AACACTAGGTTTTGGTGGTGGTGG	61160341	60℃	-	-
ConE29	#36	17	67375394	snp	C	T	0.142857		267	TCGTCGGCAGCGTCAGATGTGTATAAGAGACAG	ATTAAACCTGGATGACTCTCCCTGC	67375311	GTCTCGTGGGCTCGGAGATGTGTATAAGAGACAG	TGGGAACGTCAGACCTTCAGAAAAG	67375577	63℃	-	-
ConE29	#37	19	41435769	snp	G	A	0.173077		260	TCGTCGGCAGCGTCAGATGTGTATAAGAGACAG	caagaacttttcctggagtcccctc	41435655	GTCTCGTGGGCTCGGAGATGTGTATAAGAGACAG	ggggaagtggacctgtttagaaagg	41435914	66℃	-	-
ConE29	#38	X	17263418	snp	G	A	0.0892857		300	TCGTCGGCAGCGTCAGATGTGTATAAGAGACAG	ctaaccagtacgcccagagcttatg	17263324	GTCTCGTGGGCTCGGAGATGTGTATAAGAGACAG	TCTTCTGTCCCTTTTGCAGACTCAC	17263623	63℃	-	-
ConE29	#39	1	50163205	indel	CTG	C	0.047619		300	TCGTCGGCAGCGTCAGATGTGTATAAGAGACAG	ACTTTCCAACACAAGGTACAAAGGG	50163135	GTCTCGTGGGCTCGGAGATGTGTATAAGAGACAG	gccaggtattctgctgtagagttgg	50163434	63℃	-	-
ConE29	#40	2	115504708	indel	GGT	G	0.0454545		247	GTCTCGTGGGCTCGGAGATGTGTATAAGAGACAG	agcctgaagagactagaagaggacc	115504527	TCGTCGGCAGCGTCAGATGTGTATAAGAGACAG	GATGTGCACTTGCCCCTACAAAATG	115504773	63℃	-	-
ConE29	#41	3	45410593	indel	A	AT	0.0352113		296	GTCTCGTGGGCTCGGAGATGTGTATAAGAGACAG	TATGTGTGCATTCTTCCCGTTCCAC	45410363	TCGTCGGCAGCGTCAGATGTGTATAAGAGACAG	TTCCAGGATGCAGGGTGAATAACAG	45410658	60℃	-	-
ConE29	#43	9	22562484	indel	GGA	G	0.0425532		293	GTCTCGTGGGCTCGGAGATGTGTATAAGAGACAG	cccaccCTAACCCGAACTCTTAATG	22562362	GTCTCGTGGGCTCGGAGATGTGTATAAGAGACAG	AAGAAAAAGCATTGGGTCTGCACAC	22562654	66℃	-	-
ConE29	#45	15	86084597	indel	TTG	T	0.0506329		288	TCGTCGGCAGCGTCAGATGTGTATAAGAGACAG	tgagagcgtacgtcttgatcctagg	86084544	GTCTCGTGGGCTCGGAGATGTGTATAAGAGACAG	TGTTAAGCtggctgtgttgtaggag	86084831	63℃	-	-
ConE29	#46	2	150673355	snp	C	A	0.0535714		214	TCGTCGGCAGCGTCAGATGTGTATAAGAGACAG	acacagagaacaccactatgcttgg	150673302	GTCTCGTGGGCTCGGAGATGTGTATAAGAGACAG	ccactattgggccatatccttagcc	150673515	63℃	-	-
ConE29	#48	2	177966280	snp	A	G	0.381579		184	TCGTCGGCAGCGTCAGATGTGTATAAGAGACAG	gataactgccaattgtgccaacacc	177966223	GTCTCGTGGGCTCGGAGATGTGTATAAGAGACAG	ttgtgatgaaaactgcatggtgctg	177966406	72℃	-	-
ConE29	#61	17	13309458	snp	G	A	0.300518		350	TCGTCGGCAGCGTCAGATGTGTATAAGAGACAG	TAAGAGTTCAAATCATGTGGGACTGAAC	13309401	GTCTCGTGGGCTCGGAGATGTGTATAAGAGACAG	TCACAGAACCAATGACACACTTGAAAGG	13309750	60℃	-	-
ConE29	#64	13	98741882	indel	CG	C	0.0645161		210	TCGTCGGCAGCGTCAGATGTGTATAAGAGACAG	aagtttgcaagaccagcctctcttc	98741800	GTCTCGTGGGCTCGGAGATGTGTATAAGAGACAG	atgctcacagtcagctattggatgg	98742009	72℃	-	-
ConE29	#65	6	133347305	snp	G	T	0.0614035		397	GTCTCGTGGGCTCGGAGATGTGTATAAGAGACAG	CGATCAACATTTTCTCCAAAGTGGCAGG	133346972	TCGTCGGCAGCGTCAGATGTGTATAAGAGACAG	gcatgggaggtctttccatcttctgag	133347368	69℃	-	yes
ConJ12	#1	2	30001023	snp	T	C	0.0816327		290	GTCTCGTGGGCTCGGAGATGTGTATAAGAGACAG	AGCAGAGTTGTCAGGAACATGAAGG	30000867	TCGTCGGCAGCGTCAGATGTGTATAAGAGACAG	TCTTCCACCTGTTTCATACGCAGAG	30001156	63℃	-	-
ConJ12	#2	3	43180517	snp	G	A	0.0531915		291	GTCTCGTGGGCTCGGAGATGTGTATAAGAGACAG	tgttcagaggggaaatgggaaaagg	43180302	TCGTCGGCAGCGTCAGATGTGTATAAGAGACAG	gaggcctgatttgttgattctgtgc	43180592	63℃	-	-
ConJ12	#3	3	44980310	snp	T	G	0.0697674		300	GTCTCGTGGGCTCGGAGATGTGTATAAGAGACAG	CTATCATATCAGCCATGATCTCCTGCATC	44980098	TCGTCGGCAGCGTCAGATGTGTATAAGAGACAG	ttccaactcagttcttcaaagagttaggg	44980397	63℃	-	-
ConJ12	#4	3	150529800	snp	C	A	0.122137		246	GTCTCGTGGGCTCGGAGATGTGTATAAGAGACAG	aaCTCAAGCCAAAGGACTCTGGAAC	150529638	TCGTCGGCAGCGTCAGATGTGTATAAGAGACAG	AGCTTCAAGTTATTGATTTCCTGCAG	150529883	60℃	-	-
ConJ12	#5	3	157542251	snp	G	A	0.0806452		270	GTCTCGTGGGCTCGGAGATGTGTATAAGAGACAG	CAAACCTTGGAAGTTGCCTGTTCTG	157542032	TCGTCGGCAGCGTCAGATGTGTATAAGAGACAG	TCTGGACTCTCTGGAAGCAATTAGC	157542301	60℃	-	-
ConJ12	#6	4	28411309	snp	T	G	0.0538462		296	TCGTCGGCAGCGTCAGATGTGTATAAGAGACAG	CCACAAAATCACTTGAGCCTTGGTG	28411186	GTCTCGTGGGCTCGGAGATGTGTATAAGAGACAG	TGAATAGGGTATGTGGAAGGTAAGC	28411481	63℃	-	-
ConJ12	#7	5	25452510	snp	A	G	0.240741		300	TCGTCGGCAGCGTCAGATGTGTATAAGAGACAG	TTAGCGGAACTGTGTTAGTGCAGAG	25452458	GTCTCGTGGGCTCGGAGATGTGTATAAGAGACAG	CAGTGTAATCTGTGCAATGCCCAAG	25452757	63℃	-	-
ConJ12	#8	5	38864983	snp	A	T	0.11236		206	TCGTCGGCAGCGTCAGATGTGTATAAGAGACAG	AAAAGACAGGATGCTTCCCTTCCAG	38864899	GTCTCGTGGGCTCGGAGATGTGTATAAGAGACAG	GACCAAAGACGTTTCAAATGCCAGG	38865104	63℃	-	-
ConJ12	#9	5	61696521	snp	G	C	0.288462		293	TCGTCGGCAGCGTCAGATGTGTATAAGAGACAG	tcacctgaggaataccaaatggctg	61696455	GTCTCGTGGGCTCGGAGATGTGTATAAGAGACAG	atatgcccaggggatgaattgtagg	61696747	63℃	-	-
ConJ12	#10	5	118040448	snp	T	G	0.278689		280	TCGTCGGCAGCGTCAGATGTGTATAAGAGACAG	TTTCCAGAGAAATGTGAAGTGCAGAATTC	118040358	GTCTCGTGGGCTCGGAGATGTGTATAAGAGACAG	atgagtacactatatctgtcttcaggcac	118040637	63℃	-	-
ConJ12	#11	6	32459090	snp	C	G	0.292929		277	TCGTCGGCAGCGTCAGATGTGTATAAGAGACAG	agctctGGAACTATGTGGCCTTTTC	32458978	GTCTCGTGGGCTCGGAGATGTGTATAAGAGACAG	TGGAATTAACGGACCCTTTGAGCTC	32459254	66℃	-	-
ConJ12	#12	6	51631763	snp	T	C	0.184211		348	TCGTCGGCAGCGTCAGATGTGTATAAGAGACAG	AACTGTACAAGGTCACAACATAGGAGATG	51631665	GTCTCGTGGGCTCGGAGATGTGTATAAGAGACAG	TATGACTTAACTAATCCTGCACTAAGGCG	51632012	63℃	-	-
ConJ12	#13	6	132883301	snp	T	C	0.0727273		257	TCGTCGGCAGCGTCAGATGTGTATAAGAGACAG	tctctgtaccaataccatgcgttattt	132883189	GTCTCGTGGGCTCGGAGATGTGTATAAGAGACAG	atttaaagtggccatcttaccaaaagc	132883445	66℃	-	yes
ConJ12	#14	6	136872764	snp	G	T	0.0740741		240	GTCTCGTGGGCTCGGAGATGTGTATAAGAGACAG	ACAACCAAATGACTGTTTCTTCGCG	136872619	TCGTCGGCAGCGTCAGATGTGTATAAGAGACAG	CAGTCCCCCTTTTTCTGACTGTACC	136872858	60℃	-	-
ConJ12	#15	8	60387990	snp	G	C	0.102041		202	GTCTCGTGGGCTCGGAGATGTGTATAAGAGACAG	tgctttacaatggacagatgcaaaaagag	60387847	TCGTCGGCAGCGTCAGATGTGTATAAGAGACAG	TCTATTTCAGTTTCAGAGGCTAGGAGGAG	60388048	66℃	-	yes
ConJ12	#16	10	70832975	snp	G	T	0.0481928		270	TCGTCGGCAGCGTCAGATGTGTATAAGAGACAG	CTGCTGCCTTCTCCTTATTACTCGC	70832880	GTCTCGTGGGCTCGGAGATGTGTATAAGAGACAG	ACCGACAGACAAACATTCCTCTCAG	70833149	63℃	-	-
ConJ12	#17	10	72899626	snp	C	A	0.0720721		298	TCGTCGGCAGCGTCAGATGTGTATAAGAGACAG	AGGAAACCACAAGCAAACCCTAGAG	72899586	GTCTCGTGGGCTCGGAGATGTGTATAAGAGACAG	tctcaatgatccTCCAAAACCCAGC	72899883	63℃	-	-
ConJ12	#18	10	74493454	snp	C	T	0.0727273		213	TCGTCGGCAGCGTCAGATGTGTATAAGAGACAG	AGTCAGATTGTCATGCTGAGTGTGG	74493344	GTCTCGTGGGCTCGGAGATGTGTATAAGAGACAG	TGCATGTGATTTTTGTTTTCTGTGC	74493556	60℃	-	-
ConJ12	#19	10	108791757	snp	G	A	0.303797		289	GTCTCGTGGGCTCGGAGATGTGTATAAGAGACAG	ACTTCATTTTACACTATGAGTTCATGCTG	108791509	TCGTCGGCAGCGTCAGATGTGTATAAGAGACAG	TGTTACAATGAACTTTCTTCTTTACTCTGC	108791797	60℃	-	-
ConJ12	#20	11	13758835	snp	G	A	0.152174		258	GTCTCGTGGGCTCGGAGATGTGTATAAGAGACAG	cagaaaggccattgacttgtgtgag	13758637	TCGTCGGCAGCGTCAGATGTGTATAAGAGACAG	actagacaagtctttccactctcgc	13758894	66℃	-	-
ConJ12	#21	11	18256148	snp	T	A	0.0795455		305	GTCTCGTGGGCTCGGAGATGTGTATAAGAGACAG	ctattggagcaataaagacaccaaccaac	18255956	TCGTCGGCAGCGTCAGATGTGTATAAGAGACAG	catgttgcttacactGTATccctgaaaac	18256260	69℃	-	yes
ConJ12	#22	11	104258701	Multi	G	T	0.0943396		350	GTCTCGTGGGCTCGGAGATGTGTATAAGAGACAG	CTGTGGTTTCATTGACAAGGCAGTG	104258486	TCGTCGGCAGCGTCAGATGTGTATAAGAGACAG	TCTTCTTCCTGCAGAGATCTGTTGC	104258835	63℃	-	-
ConJ12	#22	11	104258702	Multi	A	C	0.0943396
ConJ12	#22	11	104258705	Multi	T	C	0.0943396
ConJ12	#22	11	104258708	Multi	G	A	0.0961538
ConJ12	#22	11	104258712	Multi	G	A	0.0961538
ConJ12	#22	11	104258714	Multi	G	A	0.1
ConJ12	#22	11	104258709	Multi	T	TCATTAAA	0.0961538
ConJ12	#22	11	104258715	Multi	ATGGGACGG	A	0.0925926
ConJ12	#23	11	118789688	snp	C	T	0.111111		282	GTCTCGTGGGCTCGGAGATGTGTATAAGAGACAG	aaaaacttggtccctttgctgcatc	118789480	TCGTCGGCAGCGTCAGATGTGTATAAGAGACAG	actggagtgaagctgacctactagg	118789761	63℃	-	-
ConJ12	#24	12	7461932	snp	G	T	0.369231		296	TCGTCGGCAGCGTCAGATGTGTATAAGAGACAG	gagtgactgagaggaaaggacggag	7461791	GTCTCGTGGGCTCGGAGATGTGTATAAGAGACAG	TAACTCCAACCTCTTAGCCAACTGC	7462086	63℃	-	-
ConJ12	#25	13	9843606	snp	C	T	0.178082		218	GTCTCGTGGGCTCGGAGATGTGTATAAGAGACAG	aagcatttaacggaagagaggaggc	9843450	TCGTCGGCAGCGTCAGATGTGTATAAGAGACAG	caatttcagaggggagaggatcgtg	9843667	63℃	-	-
ConJ12	#26	13	12831393	snp	T	C	0.184116		202	GTCTCGTGGGCTCGGAGATGTGTATAAGAGACAG	tacttaagcaataggtcgctgtccg	12831262	TCGTCGGCAGCGTCAGATGTGTATAAGAGACAG	aaggacacttggacactcaaccttc	12831463	72℃	-	-
ConJ12	#27	13	41601495	snp	G	A	0.333333		300	TCGTCGGCAGCGTCAGATGTGTATAAGAGACAG	TCCCATCACCTTGAATCTTTCCTGC	41601426	GTCTCGTGGGCTCGGAGATGTGTATAAGAGACAG	ataggtgagggaggactctgtcaag	41601725	60℃	-	-
ConJ12	#28	13	52744135	snp	G	A	0.0789474		226	TCGTCGGCAGCGTCAGATGTGTATAAGAGACAG	CATGAAGGTCTAGTTCAGCAGGGTG	52744020	GTCTCGTGGGCTCGGAGATGTGTATAAGAGACAG	ATCATCCAACCAGGTCTTGTCCAAC	52744245	63℃	-	-
ConJ12	#29	13	116214725	snp	C	A	0.393617		205	GTCTCGTGGGCTCGGAGATGTGTATAAGAGACAG	AAGGTTAAGTTCTCTGCAGGCAGAC	116214569	TCGTCGGCAGCGTCAGATGTGTATAAGAGACAG	TCCCACTTCCAAACAGAGATGCTTG	116214773	60℃	-	-
ConJ12	#30	14	96805436	snp	G	A	0.11236		256	GTCTCGTGGGCTCGGAGATGTGTATAAGAGACAG	gagacagtcatctaaccaggcagtg	96805282	TCGTCGGCAGCGTCAGATGTGTATAAGAGACAG	ACAGGGAAGTAGATGCAAGCATTCC	96805537	63℃	-	-
ConJ12	#31	15	86837882	snp	T	G	0.30303		222	GTCTCGTGGGCTCGGAGATGTGTATAAGAGACAG	CTGTGAAGTGCAACATTTACTGAGACTTC	86837717	TCGTCGGCAGCGTCAGATGTGTATAAGAGACAG	ATCCCATCTCTCCCATAAGACTATAGCAG	86837938	66℃	-	yes
ConJ12	#32	16	56485892	snp	G	A	0.38		280	GTCTCGTGGGCTCGGAGATGTGTATAAGAGACAG	agaagatctgacaccttcctttggC	56485735	TCGTCGGCAGCGTCAGATGTGTATAAGAGACAG	cctgacatcttctggactctgcatg	56486014	63℃	-	-
ConJ12	#33	17	29033738	snp	A	T	0.118812		300	TCGTCGGCAGCGTCAGATGTGTATAAGAGACAG	CACTACATGCCTAGCAGACCTCAAC	29033686	GTCTCGTGGGCTCGGAGATGTGTATAAGAGACAG	ctttgatcccagcactctgaaggag	29033985	66℃	-	-
ConJ12	#34	18	31002810	snp	A	G	0.0530973		284	TCGTCGGCAGCGTCAGATGTGTATAAGAGACAG	AACTCTAGACAATGCTAGGCCTTGG	31002709	GTCTCGTGGGCTCGGAGATGTGTATAAGAGACAG	GAAGAGAGGAGGAATGGCAAAGAGC	31002992	63℃	-	-
ConJ12	#35	19	7495976	snp	G	C	0.15493		257	TCGTCGGCAGCGTCAGATGTGTATAAGAGACAG	gtggatttctcagttcaaagccagc	7495890	GTCTCGTGGGCTCGGAGATGTGTATAAGAGACAG	CAATCCCTAGCAGCACAAACCAAAC	7496146	66℃	-	-
ConJ12	#36	1	63682287	indel	G	GCTAT	0.327273		296	TCGTCGGCAGCGTCAGATGTGTATAAGAGACAG	TCTCTACCTGTACATCTACCCCTACC	63682249	GTCTCGTGGGCTCGGAGATGTGTATAAGAGACAG	tccttctggacctgtgagtttaaacc	63682544	60℃	-	-
ConJ12	#37	4	115039628	indel	TC	T	0.207921		245	GTCTCGTGGGCTCGGAGATGTGTATAAGAGACAG	TCCCCTTCCCTCAAATTCTTCAGTG	115039468	TCGTCGGCAGCGTCAGATGTGTATAAGAGACAG	ATAAAAGTTCAGAGAGCATGGGGGC	115039712	66℃	-	-
ConJ12	#38	5	60254092	indel	AT	A	0.0891089		275	TCGTCGGCAGCGTCAGATGTGTATAAGAGACAG	aagaaaacacaaatgacagcctgcg	60254003	GTCTCGTGGGCTCGGAGATGTGTATAAGAGACAG	ttgcttgaggtggtactatgtgtgc	60254277	66℃	-	-
ConJ12	#39	6	95877200	indel	A	ATATC	0.129032		297	GTCTCGTGGGCTCGGAGATGTGTATAAGAGACAG	TTTTGGCTTTGGTTTTTGGAGGCAG	95877001	TCGTCGGCAGCGTCAGATGTGTATAAGAGACAG	tgtgtgtgtgtgtgtgtgtTTATGC	95877297	66℃	-	-
ConJ12	#40	6	101850462	indel	GA	G	0.0860215		269	TCGTCGGCAGCGTCAGATGTGTATAAGAGACAG	TCTGTTTGTCATTGCCTTGTTTGTGG	101850400	GTCTCGTGGGCTCGGAGATGTGTATAAGAGACAG	ttggctcttgagctttctccttagc	101850668	63℃	-	-
ConJ12	#42	11	17786233	indel	TTA	T	0.271186		226	GTCTCGTGGGCTCGGAGATGTGTATAAGAGACAG	TCACAAGTCTCCCTAATGCACATGG	17786117	TCGTCGGCAGCGTCAGATGTGTATAAGAGACAG	tcccagcaaacaaattgtggcttac	17786342	66℃	-	-
ConJ12	#45	15	69937436	indel	AT	A	0.0864198		276	GTCTCGTGGGCTCGGAGATGTGTATAAGAGACAG	GCTGTCTGTATCTCTACGACTTGCC	69937302	TCGTCGGCAGCGTCAGATGTGTATAAGAGACAG	AGATGTGAAGTCTGTAGGAAGCAGC	69937577	60℃	-	-
ConJ12	#46	17	19874753	indel	C	CTTCT	0.340426		296	GTCTCGTGGGCTCGGAGATGTGTATAAGAGACAG	GATGGCCCCATTCCTGGATCATG	19874587	TCGTCGGCAGCGTCAGATGTGTATAAGAGACAG	aCCAACCAAACAAGCAACCAACaag	19874882	66℃	-	-
ConJ12	#47	1	68268206	snp	G	A	0.0819672		294	GTCTCGTGGGCTCGGAGATGTGTATAAGAGACAG	AAAGGGAGACAGAGATGAACAGAGG	68268037	TCGTCGGCAGCGTCAGATGTGTATAAGAGACAG	tcaagtcttgagtagagcggaaggg	68268330	63℃	-	-
ConJ12	#48	3	33792358	snp	T	C	0.340909		255	GTCTCGTGGGCTCGGAGATGTGTATAAGAGACAG	AAAGCAGGATTTGGCTATCTCACCC	33792207	TCGTCGGCAGCGTCAGATGTGTATAAGAGACAG	tgtgtatcattgactatggcagggc	33792461	63℃	-	-
ConJ12	#49	4	147281720	snp	G	A	0.115942		288	TCGTCGGCAGCGTCAGATGTGTATAAGAGACAG	ACCAGCTGCTTTAATGAAGGCATTG	147281683	GTCTCGTGGGCTCGGAGATGTGTATAAGAGACAG	ACAGGTGAAGCATACATAGGCATGG	147281970	69℃	-	-
ConJ12	#50	8	20526483	snp	T	G	0.0526316		269	TCGTCGGCAGCGTCAGATGTGTATAAGAGACAG	ttgtgtgagttcctttgtgaatgtg	20526421	GTCTCGTGGGCTCGGAGATGTGTATAAGAGACAG	atggtccatcctttgatctcagcac	20526689	69℃	-	-
ConJ12	#51	8	34116766	snp	A	G	0.06		232	GTCTCGTGGGCTCGGAGATGTGTATAAGAGACAG	TGAGCATAAAAGTCACGGCTAACCC	34116584	TCGTCGGCAGCGTCAGATGTGTATAAGAGACAG	agaaatggcccagtggttaagagtg	34116815	72℃	-	-
ConJ12	#52	8	54428295	snp	A	G	0.0384615		211	TCGTCGGCAGCGTCAGATGTGTATAAGAGACAG	TGCTAGCAGAGGGTGAAGAAACAAG	54428187	GTCTCGTGGGCTCGGAGATGTGTATAAGAGACAG	AAATGGGAATTTGGCAAGTTGGAGC	54428397	63℃	-	-
ConJ12	#53	9	12444215	snp	C	T	0.0421053		217	TCGTCGGCAGCGTCAGATGTGTATAAGAGACAG	taatctgcgcatatgccaagggtag	12444106	GTCTCGTGGGCTCGGAGATGTGTATAAGAGACAG	acatctttaggagccagagcacaag	12444322	72℃	-	-
ConJ12	#54	9	13095123	snp	G	A	0.038835		270	TCGTCGGCAGCGTCAGATGTGTATAAGAGACAG	TGTGGCCATTATCACTTTTCCCTCC	13095013	GTCTCGTGGGCTCGGAGATGTGTATAAGAGACAG	ATTGTTTATGAAGCAGCTGACGTGG	13095282	63℃	-	-
ConJ12	#55	9	75750049	snp	T	C	0.0588235		320	TCGTCGGCAGCGTCAGATGTGTATAAGAGACAG	TATCACCTCTCCCTTCCATTAGCCC	75749948	GTCTCGTGGGCTCGGAGATGTGTATAAGAGACAG	AGCAGGCAAATAGGAGAAGAACCAG	75750267	69℃	-	-
ConJ12	#56	10	106639317	snp	C	G	0.0727273		247	GTCTCGTGGGCTCGGAGATGTGTATAAGAGACAG	agagttgtgactgtgggatggaaac	106639138	TCGTCGGCAGCGTCAGATGTGTATAAGAGACAG	aaggggaatgattgaagccctgaag	106639384	72℃	-	-
ConJ12	#57	12	107633730	snp	A	G	0.0833333		252	GTCTCGTGGGCTCGGAGATGTGTATAAGAGACAG	CCTGTATGTGGTGCATTTTCGTGtg	107633544	TCGTCGGCAGCGTCAGATGTGTATAAGAGACAG	gacctgaactcaaatgtccaggacc	107633795	69℃	-	-
ConJ12	#58	15	52878947	snp	T	G	0.0588235		214	TCGTCGGCAGCGTCAGATGTGTATAAGAGACAG	ataccgaatggcagagaaaaacctg	52878882	GTCTCGTGGGCTCGGAGATGTGTATAAGAGACAG	tttccagagtggttgtacaagcctg	52879095	72℃	-	-
ConJ12	#59	X	122693584	snp	A	C	0.0545455		312	GTCTCGTGGGCTCGGAGATGTGTATAAGAGACAG	atccacctgaccctttgaaggtaattatg	122693322	TCGTCGGCAGCGTCAGATGTGTATAAGAGACAG	aaaatacagagaaagggatggacatctgg	122693633	69℃	-	yes
ConJ12	#60	X	138560503	snp	A	G	0.0447761		296	GTCTCGTGGGCTCGGAGATGTGTATAAGAGACAG	GGGCCTCCATTTCTATCTCCACATG	138560251	TCGTCGGCAGCGTCAGATGTGTATAAGAGACAG	GAAAGTCTGTGTTAGCTAGGACCCC	138560546	63℃	-	-
ConJ12	#63	6	54432470	indel	GCA	G	0.0816327		293	TCGTCGGCAGCGTCAGATGTGTATAAGAGACAG	ctgacctccaGAAGTTCAGTGacac	54432427	GTCTCGTGGGCTCGGAGATGTGTATAAGAGACAG	CAAGTTTGGGACTCAAAGCAGACAC	54432719	63℃	-	-
ConJ12	#64	11	115711839	indel	CCT	C	0.0533333		236	GTCTCGTGGGCTCGGAGATGTGTATAAGAGACAG	cagcagttgagaatgtgcactgttc	115711682	TCGTCGGCAGCGTCAGATGTGTATAAGAGACAG	tgtctctctgagtgtgagtgggtag	115711917	69℃	-	-
ConJ12	#65	13	108699890	indel	CTG	C	0.0425532		224	GTCTCGTGGGCTCGGAGATGTGTATAAGAGACAG	AGTTCCAGGAGAGTATGGTAACTTGC	108699733	TCGTCGGCAGCGTCAGATGTGTATAAGAGACAG	GGGTGAACCTACATAGTGCATCCAC	108699956	63℃	-	-
ConJ12	#66	2	65276098	snp	G	A	0	0.04717	236	TCGTCGGCAGCGTCAGATGTGTATAAGAGACAG	ATTTTGAACTTAAACTACATGCCAGGC	65276022	GTCTCGTGGGCTCGGAGATGTGTATAAGAGACAG	GTTAGTCTCTTACAGTGACAGGGAAAG	65276257	69℃	-	-
ConJ12	#67	12	10106637	snp	G	C	0.01382	0.03399	209	GTCTCGTGGGCTCGGAGATGTGTATAAGAGACAG	cagagaacaagcgtttatgtggtgc	10106483	TCGTCGGCAGCGTCAGATGTGTATAAGAGACAG	TGAAGTTTGGTGGAAATGAGATGGC	10106691	72℃	-	-
ConJ12	#68	18	27437337	snp	T	A	0.03327	0.01318	329	GTCTCGTGGGCTCGGAGATGTGTATAAGAGACAG	CCTTAGAGAAGTGATCAACAGGATGAAGG	27437057	TCGTCGGCAGCGTCAGATGTGTATAAGAGACAG	CTTCTTGCAAGGCTTAATTACTGCTTGAG	27437385	66℃	-	-
ConJ12	#70	15	39038162	snp	T	A	0.04276	0.00894	297	TCGTCGGCAGCGTCAGATGTGTATAAGAGACAG	AGCGAGGTTTTCTTAGATACTTTGATCCC	39038022	GTCTCGTGGGCTCGGAGATGTGTATAAGAGACAG	TATGCAAGTTCTTCACTGTCTTCTCCTAC	39038318	69℃	-	-
ConJ12	#71	5	127791331	snp	G	A	0.00167	0.05387	294	GTCTCGTGGGCTCGGAGATGTGTATAAGAGACAG	TATGTCTGCTCCTTTGTCCATCTGC	127791134	TCGTCGGCAGCGTCAGATGTGTATAAGAGACAG	tgaaggcaaataggagaagactggc	127791427	69℃	-	-
ConJ12	#72	6	138556245	snp	A	T	0	0.05583	288	GTCTCGTGGGCTCGGAGATGTGTATAAGAGACAG	TACCACCATAAAGAGAAGTTCGCAGTTAG	138555998	TCGTCGGCAGCGTCAGATGTGTATAAGAGACAG	GGCAACATTTACAAAATAATGCAATGGTGG	138556285	66℃	-	-
ConJ12	#73	12	24393082	snp	G	A	0.00171	0.05191	306	TCGTCGGCAGCGTCAGATGTGTATAAGAGACAG	TACACTGCAACAGTCAGGGCATATG	24393038	GTCTCGTGGGCTCGGAGATGTGTATAAGAGACAG	TTGGCCCTGAATTCTCAAGGAACTC	24393343	66℃	-	-
ConJ12	#74	1	11382055	snp	G	C	0.05244	0.00338	347	TCGTCGGCAGCGTCAGATGTGTATAAGAGACAG	CTTTAACTGGAGGAAGTAGGTTACTGAGC	11381948	GTCTCGTGGGCTCGGAGATGTGTATAAGAGACAG	TGAGAAATAACCTTCCAAAATCCTGTCCC	11382294	69℃	-	-
ConJ12	#75	4	43528155	snp	C	T	0	0.05935	230	GTCTCGTGGGCTCGGAGATGTGTATAAGAGACAG	ttgcaaaagacccaggtttggtttc	43527995	TCGTCGGCAGCGTCAGATGTGTATAAGAGACAG	atcagtctggcctttgaactcgtag	43528224	72℃	-	-
ConJ12	#76	13	84930481	snp	G	A	0	0.1215	295	GTCTCGTGGGCTCGGAGATGTGTATAAGAGACAG	gtgttggcaaagatgttgtgtcctc	84930262	TCGTCGGCAGCGTCAGATGTGTATAAGAGACAG	TTACTGGTTCATCCTAGTGCGGTAC	84930556	72℃	-	-
ConJ12	#77	18	86920934	snp	T	A	0	0.12658	295	TCGTCGGCAGCGTCAGATGTGTATAAGAGACAG	TTAGACAATAGCCCACCATGCACTG	86920825	GTCTCGTGGGCTCGGAGATGTGTATAAGAGACAG	TAGATAGCCAGGAGGAGCAGAACTC	86921119	72℃	-	-
ConJ12	#78	X	115773248	snp	C	A	0	0.18352	223	GTCTCGTGGGCTCGGAGATGTGTATAAGAGACAG	ttccccagtgcccatatctttgatg	115773077	TCGTCGGCAGCGTCAGATGTGTATAAGAGACAG	tcaacaagggagctaaaaccagtgg	115773299	66℃	-	-
ConJ12	#79	4	113727133	snp	A	G	0.0223	0.16384	267	GTCTCGTGGGCTCGGAGATGTGTATAAGAGACAG	TCTTGTTCCCTTCCCCCTATCCTTC	113726981	TCGTCGGCAGCGTCAGATGTGTATAAGAGACAG	atcactcctctctctacttggagcc	113727247	69℃	-	-
ConJ12	#80	7	33525242	snp	T	G	0.02128	0.15922	290	TCGTCGGCAGCGTCAGATGTGTATAAGAGACAG	GCAGTCCTCTTACTAGCATGTGACC	33525140	GTCTCGTGGGCTCGGAGATGTGTATAAGAGACAG	ATGGTAGCTGAAGCATTTGATGGGG	33525429	72℃	-	-
ConJ12	#81	1	30848799	snp	G	A	0.0173	0.17547	332	GTCTCGTGGGCTCGGAGATGTGTATAAGAGACAG	ACATTCTTTTGCTGTTTTTCACTGGAGAG	30848509	TCGTCGGCAGCGTCAGATGTGTATAAGAGACAG	ACATGGAATATATTAGGATTGTGAgggcc	30848840	69℃	-	-
ConJ12	#82	1	184095585	snp	A	C	0.02555	0.16382	200	TCGTCGGCAGCGTCAGATGTGTATAAGAGACAG	gtgggaatttgtcgagctaagtgtc	184095528	GTCTCGTGGGCTCGGAGATGTGTATAAGAGACAG	gctgctgtttggctattttctcagg	184095727	69℃	-	-
ConJ12	#83	11	42650505	snp	C	G	0.00183	0.20463	255	TCGTCGGCAGCGTCAGATGTGTATAAGAGACAG	CCAGTGAGAGTTGTCTGACCTTTCC	42650429	GTCTCGTGGGCTCGGAGATGTGTATAAGAGACAG	GTGTTGCAGCTTGTGACTGAAGAAG	42650683	69℃	-	-
ConJ12	#84	5	116653758	snp	C	T	0.02491	0.25594	274	TCGTCGGCAGCGTCAGATGTGTATAAGAGACAG	tccatctatcacctattagccatctatc	116653685	GTCTCGTGGGCTCGGAGATGTGTATAAGAGACAG	gagatcctatccagtcagacagaaagac	116653958	66℃	-	-
ConJ12	#85	13	23581720	snp	G	A	0.06034	0.25429	296	TCGTCGGCAGCGTCAGATGTGTATAAGAGACAG	GGTCTTGGTAAGGGTGGTGCTAAG	23581629	GTCTCGTGGGCTCGGAGATGTGTATAAGAGACAG	AATGAGTACGTTTAGCCGCCGAATC	23581924	69℃	-	-
ConJ12	#86	19	17429587	snp	C	T	0	0.04364	274	TCGTCGGCAGCGTCAGATGTGTATAAGAGACAG	GGCTAATGCAGAATTGACCTTGCtg	17429524	GTCTCGTGGGCTCGGAGATGTGTATAAGAGACAG	aggagaaggagaaggaaggagaagg	17429797	72℃	-	-
ConJ12	#87	2	30751634	snp	C	T	0	0.05069	201	GTCTCGTGGGCTCGGAGATGTGTATAAGAGACAG	CACCCATTATCCAGCTGCAAAACTG	30751480	TCGTCGGCAGCGTCAGATGTGTATAAGAGACAG	GTAGAGGGTAGTAGTGGGCTATGGG	30751680	69℃	-	-
ConJ12	#88	13	92160294	snp	C	T	0.05342	0.00209	328	TCGTCGGCAGCGTCAGATGTGTATAAGAGACAG	gtgaggatcttatgcccacacctac	92160258	GTCTCGTGGGCTCGGAGATGTGTATAAGAGACAG	gatgcagagtttggaatttgcccag	92160585	72℃	-	-
ConJ12	#90	3	118238695	snp	C	A	0.00355	0.06154	288	TCGTCGGCAGCGTCAGATGTGTATAAGAGACAG	ataaagtttgcaaaaccaaggggcc	118238643	GTCTCGTGGGCTCGGAGATGTGTATAAGAGACAG	ggggagattatggggaacttttggg	118238930	64℃	-	-
ConJ12	#91	7	14728786	snp	C	T	0	0.06466	254	TCGTCGGCAGCGTCAGATGTGTATAAGAGACAG	cacagagcttctaaggaaaccccc	14728739	GTCTCGTGGGCTCGGAGATGTGTATAAGAGACAG	aaccaagatgtctgtgctgatgctc	14728992	72℃	-	-
ConJ12	#92	6	123248662	snp	G	A	0	0.09937	254	GTCTCGTGGGCTCGGAGATGTGTATAAGAGACAG	ACATGCTCACCTGCTTAGGAAAGTC	123248482	TCGTCGGCAGCGTCAGATGTGTATAAGAGACAG	TAGGCTTATGTGCTCTGACACCTTG	123248735	69℃	-	-
ConJ12	#93	14	122761461	snp	A	T	0.01555	0.00177	305	GTCTCGTGGGCTCGGAGATGTGTATAAGAGACAG	AGGATATGTGGTTAGGACTGGTTTTCATG	122761218	TCGTCGGCAGCGTCAGATGTGTATAAGAGACAG	AAATTAATCCCTTCCAAGCCAATTTCGTG	122761522	69℃	-	-
ConJ12	#94	5	57520799	snp	T	A	0.01391	0	259	GTCTCGTGGGCTCGGAGATGTGTATAAGAGACAG	gtctggcttgagcttttgaaacctc	57520582	TCGTCGGCAGCGTCAGATGTGTATAAGAGACAG	CCATGGGATGATACAGAAAGGAGACC	57520840	66℃	-	-
ConJ12	#95	X	79491580	snp	A	C	0.0177	0.00402	284	TCGTCGGCAGCGTCAGATGTGTATAAGAGACAG	ACCTGAATTGGTATACTAATCTGCAGAAGG	79491514	GTCTCGTGGGCTCGGAGATGTGTATAAGAGACAG	GAATCAGAGTACATACATCAGGGGAAGAC	79491797	66℃	Takara LA Taq Hot Start	-
ConJ12	#96	6	61292895	snp	G	A	0.01651	0	279	TCGTCGGCAGCGTCAGATGTGTATAAGAGACAG	CTTCACACAGACGGCACAAAAAGAG	61292840	GTCTCGTGGGCTCGGAGATGTGTATAAGAGACAG	CTATTGGTGACAGCCACTCTCACTG	61293118	69℃	TOYOBO KOD-FX-Neo	-
ConJ12	#97	6	61481094	snp	C	T	0.01882	0.00181	300	GTCTCGTGGGCTCGGAGATGTGTATAAGAGACAG	ttccctgagatgagtttcttgcagg	61480872	TCGTCGGCAGCGTCAGATGTGTATAAGAGACAG	tatctttccacgaatccagcccttc	61481171	69℃	TOYOBO KOD-FX-Neo	-
ConJ12	#98	10	97155225	snp	T	C	0.01132	0	283	TCGTCGGCAGCGTCAGATGTGTATAAGAGACAG	TCATAAAGAGCACCAGGATTCAACATTC	97155097	GTCTCGTGGGCTCGGAGATGTGTATAAGAGACAG	AATGTTTTTACATGCATTTCAAGGGTGG	97155379	69℃	-	-
ConJ12	#99	2	164195677	snp	G	A	0.01286	0	241	TCGTCGGCAGCGTCAGATGTGTATAAGAGACAG	TCTGTTGTACTTCATGTGGCTGTCC	164195575	GTCTCGTGGGCTCGGAGATGTGTATAAGAGACAG	atagtgcgaagacatagatgctggc	164195815	69℃	-	-
ConJ12	#100	X	134570635	snp	T	G	0.01301	0	209	TCGTCGGCAGCGTCAGATGTGTATAAGAGACAG	AGAAATGAGGATGTgggtgtgatgg	134570573	GTCTCGTGGGCTCGGAGATGTGTATAAGAGACAG	tatggcctcaatctcagaaatccgc	134570781	69℃	-	-
ConJ12	#101	2	39711459	snp	C	T	0.01308	0	300	GTCTCGTGGGCTCGGAGATGTGTATAAGAGACAG	accagacttagaaaaacaaatgtcacatg	39711218	TCGTCGGCAGCGTCAGATGTGTATAAGAGACAG	ACTGTCTTGTTTTCACAGCATAACTC	39711517	66℃	-	-
ConJ12	#102	3	102121874	snp	G	A	0.01318	0	216	TCGTCGGCAGCGTCAGATGTGTATAAGAGACAG	ATAACAAAGGCCTGATACAGCCCAG	102121783	GTCTCGTGGGCTCGGAGATGTGTATAAGAGACAG	TTCATAGCCACAGACACGGAATCAC	102121998	69℃	-	-
ConJ12	#103	7	101516067	snp	G	A	0.01344	0	286	GTCTCGTGGGCTCGGAGATGTGTATAAGAGACAG	AGTGTATCCACCAGCGAACATGAAG	101515839	TCGTCGGCAGCGTCAGATGTGTATAAGAGACAG	tgtggcctatgaatcctctttgGTG	101516124	69℃	-	-
ConJ12	#104	17	92102208	snp	G	C	0.01483	0	246	GTCTCGTGGGCTCGGAGATGTGTATAAGAGACAG	tggttcttcagtgttctagtctgcg	92102001	TCGTCGGCAGCGTCAGATGTGTATAAGAGACAG	ccaacaccaggaatgcatttcaagg	92102246	69℃	-	-
ConJ12	#105	6	106329759	snp	G	A	0.01513	0	340	TCGTCGGCAGCGTCAGATGTGTATAAGAGACAG	tcagaggttaggagcaagcactatttatg	106329720	GTCTCGTGGGCTCGGAGATGTGTATAAGAGACAG	TGAAAAATTCATTCACCATTCACCTGTCC	106330059	69℃	-	-
ConJ12	#106	7	26325272	snp	C	T	0.01454	0	206	GTCTCGTGGGCTCGGAGATGTGTATAAGAGACAG	ggctctggcatctctaacttcttgg	26325107	TCGTCGGCAGCGTCAGATGTGTATAAGAGACAG	gcaccatgggatgaaaaccaagaac	26325312	69℃	-	-
ConJ12	#107	1	87737181	snp	A	C	0.01525	0	265	TCGTCGGCAGCGTCAGATGTGTATAAGAGACAG	GGCAGAGTTGAGCCCTTGATAGATC	87737143	GTCTCGTGGGCTCGGAGATGTGTATAAGAGACAG	TCAACCCATGTATGAAGGCAGGTTC	87737407	69℃	-	-
ConJ12	#108	1	180795369	snp	T	G	0.01682	0.00228	300	GTCTCGTGGGCTCGGAGATGTGTATAAGAGACAG	aggccatcctaggatacaaaaagaaactc	180795147	TCGTCGGCAGCGTCAGATGTGTATAAGAGACAG	GTGACTTCAAAGTTGTCCTTGAATTCCAC	180795446	66℃	-	-
ConJ12	#109	14	119108078	snp	G	A	0.01969	0	283	TCGTCGGCAGCGTCAGATGTGTATAAGAGACAG	TGATAAGTAAAGATGGCCATGGATTCCTG	119107950	GTCTCGTGGGCTCGGAGATGTGTATAAGAGACAG	GTTATAGCTCTTATCCTTCACATCAGGGC	119108232	72℃	-	-
ConJ12	#110	16	81938367	snp	C	A	0.01502	0	217	TCGTCGGCAGCGTCAGATGTGTATAAGAGACAG	caggggatatgaagactgaactggc	81938281	GTCTCGTGGGCTCGGAGATGTGTATAAGAGACAG	ttgcagcctctggttcttaatccac	81938497	69℃	-	-
ConJ12	#113	3	144622373	snp	G	A	0.01832	0	393	GTCTCGTGGGCTCGGAGATGTGTATAAGAGACAG	gtgtccttctctccaggtaaaacgacatg	144622054	TCGTCGGCAGCGTCAGATGTGTATAAGAGACAG	aaccccgtccctatttaggagagttatcc	144622446	66℃	TOYOBO KOD-FX-Neo	-
ConJ12	#114	4	147500843	snp	C	T	0.00253	0.07212	379	TCGTCGGCAGCGTCAGATGTGTATAAGAGACAG	gtccacactttggtcttccttcttcttgaa	147500698	GTCTCGTGGGCTCGGAGATGTGTATAAGAGACAG	gggcatatatccagaagatgtcacaaccag	147501076	66℃	TOYOBO KOD-FX-Neo	-
ConJ12	#115	1	58092006	snp	G	A	0.01271	0.00163	236	GTCTCGTGGGCTCGGAGATGTGTATAAGAGACAG	ctcttggggatcaaaggaccctttc	58091822	TCGTCGGCAGCGTCAGATGTGTATAAGAGACAG	AAAATGGCCTTGGATTACCCTGGAG	58092057	71℃	-	-
ConJ12	#116	1	155244306	snp	A	C	0.02032	0.01822	265	TCGTCGGCAGCGTCAGATGTGTATAAGAGACAG	CCTCCATCCCCTCCATCCCTC	155244214	GTCTCGTGGGCTCGGAGATGTGTATAAGAGACAG	GCCTTTCACCTTCAAGCAAAGCTATG	155244478	70℃	KAPA HiFi HS ReadyMix	-
ConJ12	#117	1	166475459	snp	T	C	0.02717	0.0327	320	TCGTCGGCAGCGTCAGATGTGTATAAGAGACAG	actaatttcctaagttcggcgggtc	166475348	GTCTCGTGGGCTCGGAGATGTGTATAAGAGACAG	AACAAACACAACAGAGAACGTGCTG	166475667	69℃	-	-
ConJ12	#118	2	53925950	snp	T	C	0.01613	0.04375	191	TCGTCGGCAGCGTCAGATGTGTATAAGAGACAG	actaatttcctaagttcggcgggtc	53925887	GTCTCGTGGGCTCGGAGATGTGTATAAGAGACAG	atgcaactagagacacaagcttggg	53926077	70℃	KAPA HiFi HS ReadyMix	-
ConJ12	#120	2	178774279	snp	A	G	0.04186	0.03182	281	TCGTCGGCAGCGTCAGATGTGTATAAGAGACAG	gggacatacaagctatgggaggaag	178774166	GTCTCGTGGGCTCGGAGATGTGTATAAGAGACAG	ttcagactaatttcctaggtcccgc	178774446	69℃	-	-
ConJ12	#121	3	106922801	snp	G	C	0.01435	0.02461	294	GTCTCGTGGGCTCGGAGATGTGTATAAGAGACAG	gggctgaaatcaaccaagtggaaac	106922617	TCGTCGGCAGCGTCAGATGTGTATAAGAGACAG	tccctatgtaccacagtctcaggtc	106922910	69℃	-	-
ConJ12	#122	4	116050665	snp	G	T	0.11281	0.15752	271	GTCTCGTGGGCTCGGAGATGTGTATAAGAGACAG	gtcttcagagtgagttccaggacag	116050516	TCGTCGGCAGCGTCAGATGTGTATAAGAGACAG	CACTGTTGGCCAATAGCAGTCATTC	116050786	71℃	-	-
ConJ12	#123	5	26267831	snp	C	T	0.01508	0.01033	203	GTCTCGTGGGCTCGGAGATGTGTATAAGAGACAG	aaccccctataccatccatcttccc	26267706	TCGTCGGCAGCGTCAGATGTGTATAAGAGACAG	gattttcagagAggacccatggctc	26267908	66℃	TOYOBO KOD-FX-Neo	-
ConJ12	#124	5	67765158	snp	C	T	0.01218	0.00157	287	TCGTCGGCAGCGTCAGATGTGTATAAGAGACAG	ATCTTCCTCTAGGGTCCCACATCAG	67765121	GTCTCGTGGGCTCGGAGATGTGTATAAGAGACAG	TGCTGTATCCACTGAAGCTTGTCTC	67765407	71℃	-	-
ConJ12	#125	6	63544839	snp	G	A	0.0114	0.00191	295	TCGTCGGCAGCGTCAGATGTGTATAAGAGACAG	CGTGCAGAGAGTACCTGATGTTACC	63544726	GTCTCGTGGGCTCGGAGATGTGTATAAGAGACAG	TTCTTTCCcccatcatgacaaggtg	63545020	69℃	-	-
ConJ12	#126	9	81745263	indel	C	CT	0.03551	0.0499	247	TCGTCGGCAGCGTCAGATGTGTATAAGAGACAG	acaaacagatgggctttctccttcc	81745212	GTCTCGTGGGCTCGGAGATGTGTATAAGAGACAG	TGCTATGCAATGAGAAGCCTGTCTC	81745458	66℃	Takara LA Taq Hot Start	-
ConJ12	#127	9	112439672	snp	T	G	0.01006	0.00181	257	TCGTCGGCAGCGTCAGATGTGTATAAGAGACAG	ACAGATGAGTCTCCCCTCCGATTAG	112439574	GTCTCGTGGGCTCGGAGATGTGTATAAGAGACAG	TGGAGAAAATTTGGGAGGAACTGGG	112439830	69℃	-	-
ConJ12	#128	10	71603052	snp	G	A	0.01073	0.002	227	TCGTCGGCAGCGTCAGATGTGTATAAGAGACAG	ttctttctgctactcctcctcctcc	71602996	GTCTCGTGGGCTCGGAGATGTGTATAAGAGACAG	tggggaaagttcagtcttcagcatc	71603222	69℃	-	-
ConJ12	#131	13	32333391	snp	C	T	0.01364	0.00177	299	GTCTCGTGGGCTCGGAGATGTGTATAAGAGACAG	ATCCCTCATGAAAAGCGAGAGTCAC	32333182	TCGTCGGCAGCGTCAGATGTGTATAAGAGACAG	TGAGCCATGCCAGTTAATTCTTTGG	32333480	69℃	-	-
ConJ12	#132	19	19705504	snp	G	A	0.01373	0.00188	212	TCGTCGGCAGCGTCAGATGTGTATAAGAGACAG	AGGTGTCCACTGCTCATTATCAAGG	19705402	GTCTCGTGGGCTCGGAGATGTGTATAAGAGACAG	AAGAACCGATGCTACCGATCATGTC	19705613	71℃	-	-
ConJ12	#133	X	9509504	snp	T	A	0.02778	0.02326	295	TCGTCGGCAGCGTCAGATGTGTATAAGAGACAG	cctatgtaccgcagtctcaagttcc	9509368	GTCTCGTGGGCTCGGAGATGTGTATAAGAGACAG	gcagtgggagggggtatagtatagg	9509662	69℃	-	-
							VAFs are results of WGS										-' means multiplex PCR using KAPA Fast Multiplex PCR Kits	-' means multiplex PCR using KAPA Fast Multiplex PCR Kits
							1	1
